# Supplementary material for: The LINC complex transmits integrin-dependent tension to the nuclear lamina and represses epidermal differentiation
Source: eLife. 2021 Mar 29;10:e58541. doi: 10.7554/eLife.58541 (PMC8051949; doi:10.7554/eLife.58541)
Supplement: Supplementary file 4. — Tab 1 lists genes for which ATAC-seq peaks are present in WT but absent in Sun dKO MKCs, and Tab 2 lists genes for which ATAC-seq peaks are present in Sun dKO but absent in WT MKCs. [file elife-58541-supp4.xlsx]

## Sheet: WT-specific genes ATAC peaks
Chr	Start	End	Strand	Peak Score	Focus Ratio/Region Size	Annotation	Detailed Annotation	Distance to TSS	Nearest PromoterID	Entrez ID	Nearest Unigene	Nearest Refseq	Nearest Ensembl	Gene Name	Gene Alias	Gene Description	Gene Type
chr9	37207968	37208631	+	1000	NA	promoter-TSS (NM_001310096)	promoter-TSS (NM_001310096)	-17	NM_001310096	66279	Mm.41451	NM_025464	ENSMUSG00000032121	Tmem218	1810021J13Rik|AV004931	transmembrane protein 218	protein-coding
chr17	36866898	36867485	+	773	NA	promoter-TSS (NM_001177872)	promoter-TSS (NM_001177872)	-4	NM_001024134	69097	Mm.307027	NM_001024134	ENSMUSG00000050747	Trim15	1810012B10Rik	tripartite motif-containing 15	protein-coding
chr4	125066491	125067080	+	813	NA	exon (NM_175246, exon 1 of 4)	exon (NM_175246, exon 1 of 4)	113	NM_001356560	76793	Mm.22548	NM_175246	ENSMUSG00000050213	Snip1	2410133M08Rik	Smad nuclear interacting protein 1	protein-coding
chr13	77135348	77135819	+	895	NA	promoter-TSS (NM_001145676)	promoter-TSS (NM_001145676)	47	NM_001145676	72371	Mm.81475	NM_028215	ENSMUSG00000071252	2210408I21Rik	-	RIKEN cDNA 2210408I21 gene	protein-coding
chr8	20996137	20997075	+	567	NA	Intergenic	RMER19B|LTR|ERVK	-28939	NM_183253	66298	Mm.482941	NM_183253	ENSMUSG00000074447	Defa21	2010016B13Rik|Defcr21	defensin, alpha, 21	protein-coding
chr10	22202912	22203590	+	621	NA	intron (NM_009018, intron 6 of 6)	intron (NM_009018, intron 6 of 6)	29349	NM_009018	19370	Mm.439724	NM_009018		Raet1c	RAE-1gamma	retinoic acid early transcript gamma	protein-coding
chr11	5098634	5099695	+	1000	NA	promoter-TSS (NM_001362618)	promoter-TSS (NM_001362618)	-68	NM_001283061	14030	Mm.142822	NM_007968	ENSMUSG00000009079	Ewsr1	Ews|Ewsh	Ewing sarcoma breakpoint region 1	protein-coding
chrX	75416294	75416779	+	1000	NA	promoter-TSS (NM_145956)	promoter-TSS (NM_145956)	48	NM_001294277	105886298	Mm.16366	NM_010839	ENSMUSG00000090110	Cmc4	Mtcp1nb|p8MTCP1	C-x(9)-C motif containing 4	protein-coding
chr16	17146854	17148017	+	705	NA	promoter-TSS (NM_001306169)	promoter-TSS (NM_001306169)	-206	NM_001306169	76872	Mm.101656	NM_029779	ENSMUSG00000022768	Ccdc116	4930432J16Rik	coiled-coil domain containing 116	protein-coding
chr17	71684018	71684455	+	540	NA	intron (NM_177087, intron 1 of 19)	intron (NM_177087, intron 1 of 19)	10975	NM_177087	320159	Mm.187372	NM_177087	ENSMUSG00000045761	Togaram2	4632412N22Rik|Fam179a	TOG array regulator of axonemal microtubules 2	protein-coding
chr18	46597267	46597831	+	874	NA	promoter-TSS (NM_010120)	promoter-TSS (NM_010120)	-14	NM_025698	66676	Mm.296043	NM_025698	ENSMUSG00000033184	Tmed7	3930401E15Rik|5830493P14Rik|AU044611|AW545765|TRAM	transmembrane p24 trafficking protein 7	protein-coding
chr15	31602064	31602364	+	1000	NA	promoter-TSS (NM_001356313)	promoter-TSS (NM_001356313)	98	NM_026546	68073	Mm.119185	NM_026546	ENSMUSG00000039065	Atpsckmt	A930016P21Rik|AA987072|Fam173b|mFam173b	ATP synthase C subunit lysine N-methyltransferase	protein-coding
chr12	11178868	11179077	+	567	NA	Intergenic	Intergenic	25530	NR_131083	77442	Mm.159922	NR_131083	ENSMUSG00000112041	9530020I12Rik	-	RIKEN cDNA 9530020I12 gene	ncRNA
chr5	43375513	43376060	+	758	NA	Intergenic	Intergenic	-139783	NM_001135172	109323	Mm.275553	NM_175425	ENSMUSG00000061535	C1qtnf7	5530401N20Rik|8430425G24Rik|Adig|Ctrp7	C1q and tumor necrosis factor related protein 7	protein-coding
chr11	79030661	79031443	+	626	NA	non-coding (NR_045873, exon 5 of 6)	non-coding (NR_045873, exon 5 of 6)	7455	NR_045873	790910	Mm.440410	NR_045873		Gm11201	-	predicted gene 11201	ncRNA
chr3	53463524	53464023	+	709	NA	promoter-TSS (NM_172501)	promoter-TSS (NM_172501)	-22	NM_173382	212127	Mm.491292	NM_173382	ENSMUSG00000049504	Proser1	2810046L04Rik|9330161F11	proline and serine rich 1	protein-coding
chr10	70440633	70441301	+	640	NA	promoter-TSS (NM_001143776)	promoter-TSS (NM_001143776)	57	NM_024244	71721	Mm.477813	NM_024244	ENSMUSG00000043259	Fam13c	1200015N20Rik|C030038O19Rik|mKIAA1796	family with sequence similarity 13, member C	protein-coding
chr6	91452030	91452365	+	544	NA	Intergenic	Intergenic	11210	NR_038153	69798	Mm.229265	NR_038153	ENSMUSG00000100680	1810044D09Rik	-	RIKEN cDNA 1810044D09 gene	ncRNA
chr7	44815554	44816703	+	844	NA	promoter-TSS (NM_053074)	promoter-TSS (NM_053074)	40	NM_053074	18226	Mm.2565	NM_053074	ENSMUSG00000109511	Nup62	D7Ertd649e|Nupc1|p62	nucleoporin 62	protein-coding
chr8	70041986	70043194	+	582	NA	promoter-TSS (NM_001368391)	promoter-TSS (NM_001368391)	144	NM_028993	74549	Mm.269061	NM_028993	ENSMUSG00000031858	Mau2	9130404D08Rik|A930019L04Rik|C77863|C79014|EG665649|Gm7730|Mau-2|mKIAA0892	MAU2 sister chromatid cohesion factor	protein-coding
chr17	33182148	33182431	+	630	NA	Intergenic	RMER13B|LTR|ERVK	5873	NM_010998	100038859	Mm.246543	NM_010998	ENSMUSG00000094891	Olfr55	IF6|MOR267-17|MOR267-20	olfactory receptor 55	protein-coding
chr4	141663505	141664644	+	1000	NA	promoter-TSS (NM_001347237)	promoter-TSS (NM_001347237)	72	NM_001347237	69582	Mm.33220	NM_001033150	ENSMUSG00000028917	Plekhm2	2310034J19Rik|AI854247|mKIAA0842	pleckstrin homology domain containing, family M (with RUN domain) member 2	protein-coding
chr5	128432294	128433379	+	702	NA	5' UTR (NM_172885, exon 1 of 9)	5' UTR (NM_172885, exon 1 of 9)	241	NM_172885	243274	Mm.447698	NM_172885	ENSMUSG00000034310	Tmem132d	C630028F04Rik	transmembrane protein 132D	protein-coding
chr5	21645260	21646427	+	1000	NA	promoter-TSS (NM_026034)	promoter-TSS (NM_026034)	-163	NM_001363422	67211	Mm.260782	NM_026034	ENSMUSG00000038525	Armc10	2810037C14Rik|Svh	armadillo repeat containing 10	protein-coding
chr4	124850068	124851385	+	1000	NA	promoter-TSS (NM_001142727)	promoter-TSS (NM_001142727)	4	NM_001142727	68920	Mm.272397	NM_001142727	ENSMUSG00000078570	1110065P20Rik	C530005M16Rik	RIKEN cDNA 1110065P20 gene	protein-coding
chr11	74897814	74898293	+	591	NA	promoter-TSS (NM_197943)	promoter-TSS (NM_197943)	-27	NM_177325	104662	Mm.220843	NM_177325	ENSMUSG00000038335	Tsr1	AU040765|AW550801|mKIAA1401	TSR1 20S rRNA accumulation	protein-coding
chr1	91179729	91180180	+	628	NA	5' UTR (NM_016894, exon 1 of 3)	5' UTR (NM_016894, exon 1 of 3)	132	NM_001168392	51801	Mm.3272	NM_016894	ENSMUSG00000034353	Ramp1	9130218E19Rik	receptor (calcitonin) activity modifying protein 1	protein-coding
chr3	34649575	34650013	+	596	NA	promoter-TSS (NM_011443)	promoter-TSS (NM_011443)	-201	NM_011443	20674	Mm.65396	NM_011443	ENSMUSG00000074637	Sox2	Sox-2|lcc|ysb	SRY (sex determining region Y)-box 2	protein-coding
chr8	105936924	105937338	+	625	NA	intron (NM_013640, intron 4 of 7)	intron (NM_013640, intron 4 of 7)	1261	NM_013640	19171	Mm.787	NM_013640	ENSMUSG00000031897	Psmb10	Mecl-1|Mecl1	proteasome (prosome, macropain) subunit, beta type 10	protein-coding
chr11	78751397	78751859	+	1000	NA	exon (NM_197989, exon 1 of 1)	exon (NM_197989, exon 1 of 1)	101	NM_197989	69109	Mm.341420	NM_197989	ENSMUSG00000049489	Ccnq	1810009O10Rik|Fam58a|Fam58b	cyclin Q	protein-coding
chr11	59847903	59848578	+	718	NA	exon (NM_134029, exon 1 of 5)	exon (NM_134029, exon 1 of 5)	167	NM_134029	103850	Mm.41761	NM_134029	ENSMUSG00000032615	Nt5m	2010013E09Rik|AI846937|dNT-2	5',3'-nucleotidase, mitochondrial	protein-coding
chr10	107775301	107775999	+	545	NA	intron (NM_001370989, intron 51 of 57)	Lx2|LINE|L1	-55709	NM_001081432	237523	Mm.391418	NM_001081432	ENSMUSG00000035916	Ptprq	R-PTP-Q	protein tyrosine phosphatase, receptor type, Q	protein-coding
chr11	75190384	75190677	+	788	NA	promoter-TSS (NM_144491)	promoter-TSS (NM_144491)	-47	NM_144491	116905	Mm.41496	NM_144491	ENSMUSG00000078789	Dph1	2310011M22Rik|4930488F09Rik|AW551873|Dph2l1|Ovca1	diphthamide biosynthesis 1	protein-coding
chr8	25016541	25017664	+	1000	NA	promoter-TSS (NM_027194)	promoter-TSS (NM_027194)	-109	NM_027194	69742	Mm.28626	NM_027194	ENSMUSG00000031556	Tm2d2	2410018G23Rik|Blp1	TM2 domain containing 2	protein-coding
chr7	45526066	45526482	+	556	NA	promoter-TSS (NM_008654)	promoter-TSS (NM_008654)	-6	NM_008654	17872	Mm.4048	NM_008654	ENSMUSG00000040435	Ppp1r15a	9630030H21|Gadd34|Myd116	protein phosphatase 1, regulatory subunit 15A	protein-coding
chr5	24383409	24383754	+	848	NA	TTS (NM_001002897)	TTS (NM_001002897)	8562	NM_001002897	213948	Mm.332252	NM_001002897	ENSMUSG00000038295	Atg9b	Apg912|Apg9l2|Apgdc2|Gm574|Nos3as|eONE|sONE	autophagy related 9B	protein-coding
chr10	118294003	118294416	+	593	NA	exon (NM_054079, exon 3 of 5)	exon (NM_054079, exon 3 of 5)	829	NM_054079	116849	Mm.213193	NM_054079	ENSMUSG00000090461	Iltifb	IL-22b|IL-TIFb|Il22b	interleukin 10-related T cell-derived inducible factor beta	protein-coding
chr1	181015723	181015896	+	549	NA	intron (NM_001312918, intron 1 of 8)	intron (NM_001312918, intron 1 of 8)	1760	NM_010145	13849	Mm.9075	NM_010145	ENSMUSG00000038776	Ephx1	EH|Eph-1|Eph1|Epxh1|mEH	epoxide hydrolase 1, microsomal	protein-coding
chr16	38088229	38089750	+	1000	NA	promoter-TSS (NM_019827)	promoter-TSS (NM_019827)	-12	NM_019827	56637	Mm.394930	NM_019827	ENSMUSG00000022812	Gsk3b	7330414F15Rik|8430431H08Rik|C86142|GSK-3|GSK-3beta|GSK3	glycogen synthase kinase 3 beta	protein-coding
chr17	27082915	27083987	+	656	NA	intron (NM_080553, intron 2 of 57)	intron (NM_080553, intron 2 of 57)	-7794	NR_106142	102465779		NR_106142	ENSMUSG00000098826	Mir7677	Gm27400|mmu-mir-7677	microRNA 7677	ncRNA
chr19	47090273	47091155	+	951	NA	promoter-TSS (NM_011053)	promoter-TSS (NM_011053)	-52	NM_011053	18572	Mm.41166	NM_011053	ENSMUSG00000025047	Pdcd11	1110021I22Rik|ALG-4|Pdcd7|mKIAA0185	programmed cell death 11	protein-coding
chr15	93398033	93398699	+	1000	NA	promoter-TSS (NM_001285864)	promoter-TSS (NM_001285864)	16	NM_001358749	223828	Mm.74208	NM_146062	ENSMUSG00000036167	Pphln1	CR|HSPC206|HSPC232	periphilin 1	protein-coding
chr10	127030233	127030966	+	635	NA	exon (NM_025537, exon 2 of 6)	exon (NM_025537, exon 2 of 6)	215	NM_025537	66399	Mm.29900	NM_025537	ENSMUSG00000040521	Tsfm	2310050B20Rik|9430024O13Rik|EF-TS|EF-Tsmt	Ts translation elongation factor, mitochondrial	protein-coding
chr2	13558550	13559061	+	557	NA	Intergenic	Intergenic	-14141	NM_010067	13434	Mm.6979	NM_010067	ENSMUSG00000026723	Trdmt1	Dnmt2|Rnmt2	tRNA aspartic acid methyltransferase 1	protein-coding
chr1	179711117	179711386	+	543	NA	intron (NM_001370897, intron 12 of 22)	intron (NM_001370897, intron 12 of 22)	33949	NM_001370897	383592		NM_001370897	ENSMUSG00000087236	Kif28	Gm1305|Kif28p	kinesin family member 28	protein-coding
chr2	93035633	93036547	+	585	NA	intron (NM_001177536, intron 1 of 6)	intron (NM_001177536, intron 1 of 6)	6742	NR_110333	433456	Mm.235231	NM_001002794	ENSMUSG00000075027	4631405J19Rik	-	RIKEN cDNA 4631405J19 gene	ncRNA
chr2	74704727	74705953	+	864	NA	promoter-TSS (NM_008276)	promoter-TSS (NM_008276)	-149	NM_008276	15437	Mm.280673	NM_008276	ENSMUSG00000027102	Hoxd8	4921540P06Rik|AI047735|Hox-4.3|Hox-5.4	homeobox D8	protein-coding
chr13	98262870	98263396	+	695	NA	promoter-TSS (NM_001271389)	promoter-TSS (NM_001271389)	57	NM_001271389	68558	Mm.209642	NM_023472	ENSMUSG00000021661	Ankra2	1110004M18Rik|Ankra	ankyrin repeat, family A (RFXANK-like), 2	protein-coding
chr17	35896832	35897556	+	583	NA	TTS (NM_001347378)	TTS (NM_001347378)	184	NM_001033630	69662	Mm.260159	NM_001033630	ENSMUSG00000050705	2310061I04Rik	-	RIKEN cDNA 2310061I04 gene	protein-coding
chr1	29819008	29819247	+	553	NA	Intergenic	Intergenic	319709	NR_157038	102633704		NR_157037		Gm31465	-	predicted gene, 31465	ncRNA
chr10	22273315	22273828	+	571	NA	promoter-TSS (NM_001177775)	promoter-TSS (NM_001177775)	97	NM_001177775	667281	Mm.484254	NM_001177775	ENSMUSG00000075297	H60b	EG667281	histocompatibility 60b	protein-coding
chr3	95133689	95134149	+	550	NA	promoter-TSS (NM_001163573)	promoter-TSS (NM_001163573)	93	NM_001163573	69269	Mm.182944	NM_027013	ENSMUSG00000092607	Scnm1	3110001I17Rik|Scnm1-ps	sodium channel modifier 1	protein-coding
chr17	8305761	8306108	+	582	NA	intron (NR_073374, intron 1 of 4)	intron (NR_073374, intron 1 of 4)	-5154	NM_001357890	106489	Mm.311080	NM_134114	ENSMUSG00000073468	Sft2d1	5630401J11Rik|AA409698	SFT2 domain containing 1	protein-coding
chr4	156203018	156203800	+	604	NA	non-coding (NR_030671, exon 1 of 1)	non-coding (NR_030671, exon 1 of 1)	125	NR_030671	100382	Mm.461024	NR_030671		AW011738	-	expressed sequence AW011738	ncRNA
chr5	110839435	110840221	+	1000	NA	promoter-TSS (NM_001359835)	promoter-TSS (NM_001359835)	-51	NR_153348	100900	Mm.200231	NM_153571	ENSMUSG00000043510	Hscb	AI325508|AW049829|Hsc20	HscB iron-sulfur cluster co-chaperone	protein-coding
chr4	155868819	155869852	+	1000	NA	promoter-TSS (NM_028020)	promoter-TSS (NM_028020)	105	NM_024472	79554	Mm.25556	NM_024472	ENSMUSG00000029073	Cptp	Gltpd1	ceramide-1-phosphate transfer protein	protein-coding
chr19	53943852	53945278	+	1000	NA	promoter-TSS (NM_001195348)	promoter-TSS (NM_001195348)	62	NM_001195348	100503572	Mm.375091	NM_001195338	ENSMUSG00000084957	Bbip1	2310002J21Rik|2610002B11Rik|4930560M04Rik|Ncrna00081	BBSome interacting protein 1	protein-coding
chr10	117045345	117046515	+	594	NA	exon (NM_146242, exon 1 of 1)	exon (NM_146242, exon 1 of 1)	589	NM_146242	237560	Mm.37320	NM_146242	ENSMUSG00000060187	Lrrc10	D330003I11Rik|Hrlrrp|Serdin1	leucine rich repeat containing 10	protein-coding
chr5	119741208	119741443	+	548	NA	Intergenic	Intergenic	-50107	NR_040416	433944	Mm.491053	NR_040416	ENSMUSG00000086847	Tbx3os2	Gm16065	T-box 3, opposite strand 2	ncRNA
chr3	100162116	100162740	+	1000	NA	promoter-TSS (NM_010269)	promoter-TSS (NM_010269)	-21	NM_175552	269470	Mm.24591	NM_175552	ENSMUSG00000033285	Wdr3	AW546279|D030020G18Rik	WD repeat domain 3	protein-coding
chr4	32800141	32800583	+	835	NA	intron (NM_175364, intron 1 of 2)	CpG	103	NM_175364	108755	Mm.1182	NM_175364	ENSMUSG00000045854	Lyrm2	2610208E05Rik	LYR motif containing 2	protein-coding
chr4	35089672	35090266	+	680	NA	intron (NM_178061, intron 1 of 3)	intron (NM_178061, intron 1 of 3)	-62086	NM_199157	387510	Mm.386929	NM_199157	ENSMUSG00000042993	Ifnk	-	interferon kappa	protein-coding
chr1	155529277	155529545	+	595	NA	Intergenic	Intergenic	-2300	NR_132128	433367	Mm.359304	NR_132128	ENSMUSG00000073535	Gm5532	EG433367	predicted gene 5532	ncRNA
chr7	125581358	125581770	+	754	NA	Intergenic	Intergenic	-21865	NM_021887	60504	Mm.155643	NM_021887	ENSMUSG00000030745	Il21r	NILR	interleukin 21 receptor	protein-coding
chr10	80199512	80199812	+	546	NA	intron (NR_038088, intron 1 of 4)	intron (NR_038088, intron 1 of 4)	20180	NM_007909	13637	Mm.1478	NM_007909	ENSMUSG00000003070	Efna2	CEK7L|Elf1|Epl6|Eplg6|Lerk6	ephrin A2	protein-coding
chr3	9250135	9251908	+	618	NA	5' UTR (NM_177660, exon 1 of 6)	5' UTR (NM_177660, exon 1 of 6)	454	NM_177660	229055	Mm.103262	NM_177660	ENSMUSG00000069114	Zbtb10	4832414A18|AU021107|RINZF	zinc finger and BTB domain containing 10	protein-coding
chr4	129608554	129608954	+	689	NA	TTS (NM_029748)	TTS (NM_029748)	5518	NM_001195730	100504491	Mm.482597	NM_001195730	ENSMUSG00000078552	Dcdc2b	Gm12964|Gm1366	doublecortin domain containing 2b	protein-coding
chr5	24586450	24586973	+	768	NA	promoter-TSS (NM_133913)	promoter-TSS (NM_133913)	-33	NR_155297	100910	Mm.140672	NM_133913	ENSMUSG00000038181	Chpf2	2010209O12Rik|AW060945|Gm42230|mKIAA1402|mir-671	chondroitin polymerizing factor 2	protein-coding
chr9	20642483	20643417	+	951	NA	promoter-TSS (NM_025401)	promoter-TSS (NM_025401)	72	NR_153857	66177	Mm.390165	NM_025401	ENSMUSG00000084786	Ubl5	1110030M22Rik|beacon	ubiquitin-like 5	protein-coding
chr4	117019228	117019948	+	1000	NA	intron (NM_001111277, intron 1 of 11)	CpG	186	NM_175135	108067	Mm.34612	NM_175135	ENSMUSG00000028683	Eif2b3	1190002P15Rik	eukaryotic translation initiation factor 2B, subunit 3	protein-coding
chr15	59373737	59374648	+	542	NA	promoter-TSS (NM_026746)	promoter-TSS (NM_026746)	-5	NM_153548	223593	Mm.218665	NM_153548	ENSMUSG00000022350	Washc5	AL022848|C76463|E430025E21Rik|strumpellin	WASH complex subunit 5	protein-coding
chr4	127324857	127325126	+	655	NA	TTS (NM_008126)	TTS (NM_008126)	4134	NM_008126	14620	Mm.90003	NM_008126	ENSMUSG00000042367	Gjb3	Cnx31|Cx31|D4Wsu144e|Gjb-3	gap junction protein, beta 3	protein-coding
chr13	55592996	55593279	+	699	NA	promoter-TSS (NM_026211)	promoter-TSS (NM_026211)	2	NM_026211	67511	Mm.45233	NM_026211	ENSMUSG00000058569	Tmed9	2400003B06Rik	transmembrane p24 trafficking protein 9	protein-coding
chr10	127091180	127091901	+	741	NA	intron (NM_001033263, intron 18 of 18)	CpG-1581	12633	NM_001033263	216439	Mm.336761	NM_001033263	ENSMUSG00000025422	Agap2	AGAP-2|Centg1|PIKE|cnt-g1|mKIAA0167	ArfGAP with GTPase domain, ankyrin repeat and PH domain 2	protein-coding
chr1	88134523	88134971	+	690	NA	promoter-TSS (NM_145079)	promoter-TSS (NM_145079)	-62	NM_145079	94284	Mm.300095	NM_145079	ENSMUSG00000054545	Ugt1a6a	UDPGT|UDPGT 1-6|UGT1-06|UGT1.6|Ugt1a6|Ugt1a7	UDP glucuronosyltransferase 1 family, polypeptide A6A	protein-coding
chr4	3574501	3575200	+	1000	NA	promoter-TSS (NM_028097)	promoter-TSS (NM_028097)	3	NR_149728	72098	Mm.441135	NM_028097	ENSMUSG00000028232	Tmem68	2010300G19Rik|AA408325|AW123402	transmembrane protein 68	protein-coding
chr2	174932764	174933067	+	588	NA	Intergenic	Intergenic	134854	NM_001085546	664987		NM_001085546	ENSMUSG00000078905	Gm14393	-	predicted gene 14393	protein-coding
chr19	59459110	59459757	+	567	NA	promoter-TSS (NR_002863)	promoter-TSS (NR_002863)	743	NM_010132	13797	Mm.245394	NM_010132	ENSMUSG00000043969	Emx2	Pdo	empty spiracles homeobox 2	protein-coding
chr15	83297202	83297618	+	559	NA	Intergenic	Intergenic	44448	NR_162786	114483639		NR_162786		Mir12186	mmu-mir-12186	microRNA mir-12186	ncRNA
chr11	76285506	76285909	+	706	NA	intron (NM_008750, intron 1 of 7)	intron (NM_008750, intron 1 of 7)	41971	NM_183263	67390	Mm.24886	NM_183263	ENSMUSG00000038046	Mrm3	4833420N02Rik|AI255153|HC90|Rnmtl1	mitochondrial rRNA methyltransferase 3	protein-coding
chr2	30237072	30238073	+	1000	NA	promoter-TSS (NR_028299)	promoter-TSS (NR_028299)	59	NR_028299	67350	Mm.402683	NR_028299		1700084E18Rik	-	RIKEN cDNA 1700084E18 gene	ncRNA
chr8	3630958	3631204	+	617	NA	promoter-TSS (NM_011503)	promoter-TSS (NM_011503)	-28	NM_001357168	20911	Mm.7247	NM_011503	ENSMUSG00000004626	Stxbp2	C79054|Munc-18-2|Munc-18b|Munc18b|Sxtbp2|Sxtp2|Unc18-2|Unc18b|muSec1	syntaxin binding protein 2	protein-coding
chr11	57913880	57914107	+	561	NA	Intergenic	Intergenic	-81846	NM_008213	15110	Mm.4746	NM_008213	ENSMUSG00000037335	Hand1	Ehand1|Hxt|Th1|Thing1|bHLHa27|eHAND	heart and neural crest derivatives expressed 1	protein-coding
chr7	39204966	39205849	+	658	NA	Intergenic	Intergenic	207753	NM_177890	330513	Mm.67238	NM_177890	ENSMUSG00000053742	Gm5114	4921507A12|EG330513	predicted gene 5114	protein-coding
chr6	65380950	65381537	+	543	NA	promoter-TSS (NM_175524)	promoter-TSS (NM_175524)	-51	NM_175524	243407	Mm.389758	NM_175524	ENSMUSG00000029917	Qrfprl	C130060K24Rik	pyroglutamylated RFamide peptide receptor like	protein-coding
chr17	68273528	68274441	+	598	NA	intron (NM_177278, intron 1 of 20)	intron (NM_177278, intron 1 of 20)	187	NM_177278	320858	Mm.137356	NM_177278	ENSMUSG00000041565	L3mbtl4	A730037L19Rik|D930040M24Rik	L3MBTL4 histone methyl-lysine binding protein	protein-coding
chr7	127511825	127512985	+	1000	NA	non-coding (NR_024331, exon 1 of 1)	non-coding (NR_024331, exon 1 of 1)	422	NM_001304266	100043597	Mm.428042	NM_175144	ENSMUSG00000053877	Srcap	B930091H02Rik|D030022P06Rik|F630004O05Rik	Snf2-related CREBBP activator protein	protein-coding
chr2	140170188	140171281	+	909	NA	promoter-TSS (NM_001081090)	promoter-TSS (NM_001081090)	88	NM_027093	69487	Mm.287921	NM_027093	ENSMUSG00000027384	Ndufaf5	2310003L22Rik	NADH:ubiquinone oxidoreductase complex assembly factor 5	protein-coding
chr2	130423782	130424898	+	665	NA	promoter-TSS (NM_178762)	promoter-TSS (NM_178762)	20	NM_001362651	80743	Mm.276092	NM_030559	ENSMUSG00000027411	Vps16	1810074M16Rik|mVPS16	VSP16 CORVET/HOPS core subunit	protein-coding
chr2	163644642	163645544	+	1000	NA	promoter-TSS (NM_012032)	promoter-TSS (NM_012032)	50	NM_012032	26943	Mm.218473	NM_012032	ENSMUSG00000017707	Serinc3	AA959945|AA960047|AIGP1|DIFF33|TMS-1|Tde1	serine incorporator 3	protein-coding
chr15	79140920	79141531	+	812	NA	promoter-TSS (NM_001310576)	promoter-TSS (NM_001310576)	26	NM_001310581	27660	Mm.390827	NM_138581	ENSMUSG00000033029	1700088E04Rik	ESTJ0827E04	RIKEN cDNA 1700088E04 gene	protein-coding
chr5	137313868	137314922	+	644	NA	promoter-TSS (NM_011639)	promoter-TSS (NM_011639)	-154	NM_011639	22051	Mm.27063	NM_011639	ENSMUSG00000023348	Trip6	-	thyroid hormone receptor interactor 6	protein-coding
chr7	19149720	19149961	+	752	NA	promoter-TSS (NM_026943)	promoter-TSS (NM_026943)	2	NM_026943	107686	Mm.29135	NM_026943	ENSMUSG00000040824	Snrpd2	1810009A06Rik|SMD2	small nuclear ribonucleoprotein D2	protein-coding
chr5	34288156	34288811	+	568	NA	promoter-TSS (NM_001370805)	promoter-TSS (NM_001370805)	-159	NM_001015039	231125	Mm.113388	NM_001015039	ENSMUSG00000037224	Zfyve28	9630058O20Rik|Gm146|mKIAA1643	zinc finger, FYVE domain containing 28	protein-coding
chr6	3424687	3424916	+	544	NA	Intergenic	Intergenic	-25230	NM_010156	209086	Mm.196013	NM_010156	ENSMUSG00000047735	Samd9l	AA175286|ESTM25|mKIAA2005	sterile alpha motif domain containing 9-like	protein-coding
chr4	154963965	154964839	+	584	NA	intron (NM_172990, intron 1 of 18)	CpG	279	NR_131230	269614	Mm.30042	NM_172990	ENSMUSG00000029056	Pank4	D030031I12Rik|R75150	pantothenate kinase 4	protein-coding
chr8	124897435	124898522	+	729	NA	promoter-TSS (NM_001111141)	promoter-TSS (NM_001111141)	84	NM_001111141	244666	Mm.482915	NM_001111141	ENSMUSG00000031986	Sprtn	Gm505	SprT-like N-terminal domain	protein-coding
chr5	38277120	38277842	+	566	NA	promoter-TSS (NM_172709)	promoter-TSS (NM_172709)	77	NM_172709	21906	Mm.204765	NM_172709	ENSMUSG00000051596	Otop1	A530025J20Rik|Otp1|tlt	otopetrin 1	protein-coding
chr10	80855094	80855466	+	883	NA	promoter-TSS (NM_175195)	promoter-TSS (NM_175195)	5	NM_175195	73218	Mm.3285	NM_175195	ENSMUSG00000035206	Sppl2b	3110056O03Rik|AW550292|PSL1	signal peptide peptidase like 2B	protein-coding
chrX	107455901	107456497	+	895	NA	Intergenic	Lx|LINE|L1	-52839	NM_008409	16431	Mm.193	NM_008409	ENSMUSG00000031239	Itm2a	AW108051|Bricd2a|E25|Itm2	integral membrane protein 2A	protein-coding
chr1	93981007	93981196	+	556	NA	Intergenic	Intergenic	-9404	NM_001039219	619597	Mm.417228	NM_001039219	ENSMUSG00000073608	Gal3st2c	EG619597|Gm219|Gm6086	galactose-3-O-sulfotransferase 2C	protein-coding
chr8	45975042	45975623	+	1000	NA	promoter-TSS (NM_138668)	promoter-TSS (NM_138668)	-80	NM_001033148	69479	Mm.158282	NM_001033148	ENSMUSG00000071103	1700029J07Rik	-	RIKEN cDNA 1700029J07 gene	protein-coding
chr13	55727158	55727653	+	784	NA	promoter-TSS (NM_028281)	promoter-TSS (NM_028281)	37	NM_028281	72562	Mm.28145	NM_028281	ENSMUSG00000021496	Pcbd2	2700061N24Rik|Dcoh2|Dcohm	pterin 4 alpha carbinolamine dehydratase/dimerization cofactor of hepatocyte nuclear factor 1 alpha (TCF1) 2	protein-coding
chr11	58979681	58980027	+	715	NA	intron (NM_053168, intron 1 of 5)	intron (NM_053168, intron 1 of 5)	1761	NM_053168	94091	Mm.248049	NM_053168	ENSMUSG00000020455	Trim11	-	tripartite motif-containing 11	protein-coding
chr4	147936536	147936909	+	870	NA	promoter-TSS (NM_011122)	promoter-TSS (NM_011122)	54	NM_011122	18822	Mm.23951	NM_011122	ENSMUSG00000019055	Plod1	2410042F05Rik|AI854890|AV007929|Lh1|Plod	procollagen-lysine, 2-oxoglutarate 5-dioxygenase 1	protein-coding
chr17	23673418	23673989	+	1000	NA	promoter-TSS (NM_181821)	promoter-TSS (NM_181821)	95	NM_181821	353502	Mm.359030	NM_181821	ENSMUSG00000023904	Hcfc1r1	HPIP	host cell factor C1 regulator 1 (XPO1-dependent)	protein-coding
chrX	72987132	72987514	+	630	NA	promoter-TSS (NM_001109043)	promoter-TSS (NM_001109043)	-16	NM_009549	22673	Mm.1161	NM_009549	ENSMUSG00000031351	Zfp185	P1|Znf185	zinc finger protein 185	protein-coding
chr3	135825427	135825741	+	719	NA	promoter-TSS (NM_001135150)	promoter-TSS (NM_001135150)	-73	NM_001135149	67547	Mm.30239	NM_026228	ENSMUSG00000053897	Slc39a8	4933419D20Rik|AA986696|BIGM103|ZIP-8|Zip8	solute carrier family 39 (metal ion transporter), member 8	protein-coding
chr17	28328159	28328807	+	770	NA	promoter-TSS (NM_001357628)	promoter-TSS (NM_001357628)	12	NM_011287	19896	Mm.336955	NM_011287	ENSMUSG00000037805	Rpl10a	CsA-19|Nedd6	ribosomal protein L10A	protein-coding
chr7	3401001	3401282	+	593	NA	intron (NM_133190, intron 1 of 3)	intron (NM_133190, intron 1 of 3)	7099	NM_133190	81905	Mm.357990	NM_133190	ENSMUSG00000053395	Cacng8	-	calcium channel, voltage-dependent, gamma subunit 8	protein-coding
chr11	101119488	101120247	+	1000	NA	promoter-TSS (NM_028933)	promoter-TSS (NM_028933)	-26	NM_026501	67998	Mm.33881	NM_026501	ENSMUSG00000017802	Retreg3	1300010M03Rik|4933404C01Rik|AI551748|Fam134c	reticulophagy regulator family member 3	protein-coding
chr8	107056585	107057137	+	899	NA	promoter-TSS (NM_001164472)	promoter-TSS (NM_001164472)	-16	NM_025391	66164	Mm.334789	NM_025391	ENSMUSG00000031917	Nip7	1110017C15Rik|6330509M23Rik|AA408773|AA410017|PEachy	NIP7, nucleolar pre-rRNA processing protein	protein-coding
chr15	79804155	79805119	+	701	NA	promoter-TSS (NM_030689)	promoter-TSS (NM_030689)	72	NM_030689	73340	Mm.38438	NM_030689	ENSMUSG00000022421	Nptxr	1200009K17Rik|1700036C17Rik|5730406O18Rik|AI452369|AI785356|D15Bwg0580e|NPR|Npcd	neuronal pentraxin receptor	protein-coding
chr2	29060121	29060695	+	713	NA	intron (NM_009442, intron 1 of 11)	CpG	145	NM_009442	22130	Mm.252195	NM_009442	ENSMUSG00000026803	Ttf1	AV245725|TTF-1|TTF-I	transcription termination factor, RNA polymerase I	protein-coding
chr6	134406998	134407531	+	647	NA	intron (NM_025778, intron 2 of 6)	intron (NM_025778, intron 2 of 6)	-3849	NR_153848	102639979		NR_153848		4933406J09Rik	Gm44293	RIKEN cDNA 4933406J09 gene	ncRNA
chr19	5359079	5359943	+	558	NA	Intergenic	Intergenic	6852	NM_001038231	23825	Mm.358649	NM_011793	ENSMUSG00000024844	Banf1	Baf|Bcrp1|L2bp1/Baf	barrier to autointegration factor 1	protein-coding
chr9	37613308	37614070	+	712	NA	promoter-TSS (NM_011734)	promoter-TSS (NM_011734)	31	NM_011449	20686	Mm.8637	NM_011449	ENSMUSG00000001948	Spa17	Sp17	sperm autoantigenic protein 17	protein-coding
chr13	34037469	34037731	+	568	NA	promoter-TSS (NM_026512)	promoter-TSS (NM_026512)	-41	NM_026512	68021	Mm.140243	NM_026512	ENSMUSG00000038286	Bphl	2010012D11Rik|5730533B08Rik|AI115341	biphenyl hydrolase-like (serine hydrolase, breast epithelial mucin-associated antigen)	protein-coding
chr10	105573646	105575582	+	698	NA	promoter-TSS (NR_038032)	promoter-TSS (NR_038032)	63	NR_038032	327812	Mm.191660	NR_038032	ENSMUSG00000085282	Gm15663	9330159K06	predicted gene 15663	ncRNA
chr2	147373366	147373954	+	649	NA	intron (NM_008780, intron 4 of 4)	intron (NM_008780, intron 4 of 4)	8666	NM_008780	18503	Mm.315502	NM_008780	ENSMUSG00000037034	Pax1	Pax-1|hbs|hunchback|un|undulated|wt	paired box 1	protein-coding
chr3	90537254	90537453	+	554	NA	promoter-TSS (NM_001356608)	promoter-TSS (NM_001356608)	99	NM_001356606	67860	Mm.331185	NM_026416	ENSMUSG00000074457	S100a16	2300002L21Rik|AI325039|AI663996|DT1P1A7|S100F	S100 calcium binding protein A16	protein-coding
chr8	106150031	106150776	+	743	NA	promoter-TSS (NM_133792)	promoter-TSS (NM_133792)	49	NM_001357319	192654	Mm.284770	NM_133792	ENSMUSG00000031903	Pla2g15	ACS|C87498|LLPL|Lpla2|Lypla3	phospholipase A2, group XV	protein-coding
chr5	138186924	138187264	+	544	NA	promoter-TSS (NM_178612)	promoter-TSS (NM_178612)	132	NM_001356601	21343	Mm.248517	NM_009315	ENSMUSG00000036980	Taf6	80kDa|AW549759|TAF(II)80|TAFII70|Taf2e|p80	TATA-box binding protein associated factor 6	protein-coding
chr5	20925542	20925800	+	617	NA	intron (NM_001080977, intron 2 of 7)	intron (NM_001080977, intron 2 of 7)	-25318	NR_030699	320770	Mm.491217	NR_030699	ENSMUSG00000101013	A630072M18Rik	Aptr	RIKEN cDNA A630072M18 gene	ncRNA
chr2	10080062	10081011	+	1000	NA	promoter-TSS (NM_020615)	promoter-TSS (NM_020615)	-26	NM_020615	11949	Mm.12677	NM_020615	ENSMUSG00000025781	Atp5c1	1700094F02Rik|Atp5f1c	ATP synthase, H+ transporting, mitochondrial F1 complex, gamma polypeptide 1	protein-coding
chr8	85025182	85025672	+	848	NA	promoter-TSS (NM_019652)	promoter-TSS (NM_019652)	-140	NM_001357203	56495	Mm.41475	NM_019652	ENSMUSG00000052456	Asna1	1810048H22Rik|ArsA	arsA arsenite transporter, ATP-binding, homolog 1 (bacterial)	protein-coding
chr17	57105211	57106003	+	633	NA	exon (NM_009404, exon 1 of 3)	exon (NM_009404, exon 1 of 3)	222	NM_009404	21950	Mm.41171	NM_009404	ENSMUSG00000035678	Tnfsf9	4-1BB-L|4-1BBL|AI848817|Cd137l|Ly63l	tumor necrosis factor (ligand) superfamily, member 9	protein-coding
chr6	66106633	66108043	+	593	NA	Intergenic	RMER1A|Other|Other	154767	NM_001161773	67653	Mm.389756	NM_001161773	ENSMUSG00000036463	4930544G11Rik	-	RIKEN cDNA 4930544G11 gene	protein-coding
chr8	84832116	84832604	+	700	NA	promoter-TSS (NR_033145)	promoter-TSS (NR_033145)	78	NM_183358	102060	Mm.489649	NM_183358	ENSMUSG00000033751	Gadd45gip1	2310040G17Rik|AI425883|Crif1|MRP-L59|Plinp1	growth arrest and DNA-damage-inducible, gamma interacting protein 1	protein-coding
chr11	100472129	100472958	+	670	NA	exon (NM_172565, exon 1 of 2)	exon (NM_172565, exon 1 of 2)	239	NR_155072	217194	Mm.183320	NM_172565	ENSMUSG00000048732	Klhl11	BC011167	kelch-like 11	protein-coding
chr19	5473757	5474056	+	714	NA	promoter-TSS (NM_021474)	promoter-TSS (NM_021474)	-784	NM_021474	58859	Mm.276367	NM_021474	ENSMUSG00000024909	Efemp2	0610011K11Rik|Fbln4|MBP1	epidermal growth factor-containing fibulin-like extracellular matrix protein 2	protein-coding
chr17	78936728	78937413	+	1000	NA	promoter-TSS (NM_028611)	promoter-TSS (NM_028611)	0	NM_001024806	12607	Mm.24169	NM_009882	ENSMUSG00000024081	Cebpz	AI848081|CBF2|Cbf|Cebpa-rs1	CCAAT/enhancer binding protein zeta	protein-coding
chr14	25527360	25527651	+	730	NA	intron (NM_183208, intron 2 of 23)	intron (NM_183208, intron 2 of 23)	-6934	NR_037236	100526533		NR_037236	ENSMUSG00000093081	Mir3075	mir-3075|mmu-mir-3075	microRNA 3075	ncRNA
chr5	137921530	137921770	+	551	NA	promoter-TSS (NM_007819)	promoter-TSS (NM_007819)	-31	NM_007819	13113	Mm.289886	NM_007819	ENSMUSG00000029727	Cyp3a13	IIIAm2	cytochrome P450, family 3, subfamily a, polypeptide 13	protein-coding
chr17	34836499	34837190	+	809	NA	promoter-TSS (NM_001163770)	promoter-TSS (NM_001163770)	59	NM_019442	54402	Mm.440064	NM_019442	ENSMUSG00000061207	Stk19	G11|RP1	serine/threonine kinase 19	protein-coding
chr13	67813706	67814285	+	894	NA	intron (NM_198322, intron 1 of 3)	CpG	179	NM_198322	212569	Mm.358842	NM_198322	ENSMUSG00000030446	Zfp273	6820416H06Rik|Rslcan1	zinc finger protein 273	protein-coding
chr11	78512020	78512418	+	985	NA	promoter-TSS (NM_026389)	promoter-TSS (NM_026389)	-51	NM_199199	195040	Mm.383431	NM_199199	ENSMUSG00000051232	Tmem199	AI316787|AI848469|R74819	transmembrane protein 199	protein-coding
chr19	39882443	39882867	+	759	NA	intron (NM_001104525, intron 1 of 8)	RLTR44C|LTR|ERVK	4114	NM_001104525	100043108	Mm.482331	NM_001104525	ENSMUSG00000092008	Cyp2c69	AI098658	cytochrome P450, family 2, subfamily c, polypeptide 69	protein-coding
chr3	65666113	65666530	+	636	NA	promoter-TSS (NM_001166659)	promoter-TSS (NM_001166659)	93	NM_001166659	624866	Mm.296317	NM_001037923	ENSMUSG00000074579	Lekr1	EG546798|EG624866|Gm6534	leucine, glutamate and lysine rich 1	protein-coding
chr13	55936905	55937770	+	731	NA	Intergenic	Intergenic	-105912	NM_011097	18740	Mm.135195	NM_011097	ENSMUSG00000021506	Pitx1	Bft|P-OTX|Potx|Ptx1	paired-like homeodomain transcription factor 1	protein-coding
chr6	38960993	38961373	+	558	NA	intron (NM_011539, intron 3 of 12)	intron (NM_011539, intron 3 of 12)	42197	NM_011539	21391	Mm.4054	NM_011539	ENSMUSG00000029925	Tbxas1	CYP5|CYP5A1|THAS|TS|TXAS|TXS	thromboxane A synthase 1, platelet	protein-coding
chr11	119913349	119914058	+	688	NA	promoter-TSS (NM_001085498)	promoter-TSS (NM_001085498)	-107	NM_001085498	208092	Mm.306673	NM_001085498	ENSMUSG00000025371	Chmp6	2400004G01Rik	charged multivesicular body protein 6	protein-coding
chr1	96805336	96805769	+	790	NA	Intergenic	Intergenic	-65574	NR_131964	329217	Mm.108566	NR_131964		Panct2	9530060I07|EG329217|Gm5101	pluripotency-associated noncoding transcript 2	ncRNA
chr7	100285307	100285852	+	619	NA	promoter-TSS (NM_177161)	promoter-TSS (NM_177161)	59	NM_177161	320452	Mm.150294	NM_177161	ENSMUSG00000051048	P4ha3	D930031A02Rik	procollagen-proline, 2-oxoglutarate 4-dioxygenase (proline 4-hydroxylase), alpha polypeptide III	protein-coding
chr5	24602498	24603273	+	842	NA	promoter-TSS (NM_025891)	promoter-TSS (NM_025891)	-883	NM_025891	66993	Mm.436539	NM_025891	ENSMUSG00000028949	Smarcd3	1500001J14Rik|2210409C08Rik|BAF60C	SWI/SNF related, matrix associated, actin dependent regulator of chromatin, subfamily d, member 3	protein-coding
chr4	128776853	128777270	+	828	NA	intron (NM_001081098, intron 8 of 8)	intron (NM_001081098, intron 8 of 8)	17803	NM_001009819	215493	Mm.300900	NM_001009819	ENSMUSG00000028794	A3galt2	Gm433|iGb3|iGb3S	alpha 1,3-galactosyltransferase 2 (isoglobotriaosylceramide synthase)	protein-coding
chr12	116077174	116078096	+	625	NA	promoter-TSS (NM_009511)	promoter-TSS (NM_009511)	-91	NM_009511	22355	Mm.395245	NM_009511	ENSMUSG00000011171	Vipr2	VPAC2|VPAC2R|Vip2	vasoactive intestinal peptide receptor 2	protein-coding
chr15	84121172	84121413	+	717	NA	intron (NM_029427, intron 2 of 9)	intron (NM_029427, intron 2 of 9)	1883	NM_029427	75772	Mm.159565	NM_029427	ENSMUSG00000018868	Pnpla5	4833426H19Rik|GS2L	patatin-like phospholipase domain containing 5	protein-coding
chr3	106547225	106548177	+	542	NA	promoter-TSS (NM_001286987)	promoter-TSS (NM_001286987)	-76	NM_001357818	99712	Mm.429443	NM_133869	ENSMUSG00000040774	Cept1	9930118K05Rik|mCEPT1	choline/ethanolaminephosphotransferase 1	protein-coding
chr5	112342738	112343270	+	863	NA	promoter-TSS (NM_027323)	promoter-TSS (NM_027323)	36	NM_027323	70118	Mm.172947	NM_027323	ENSMUSG00000029346	Srrd	2810002G02Rik|Srr1	SRR1 domain containing	protein-coding
chr18	38918568	38919042	+	562	NA	promoter-TSS (NM_010197)	promoter-TSS (NM_010197)	-106	NM_010197	14164	Mm.241282	NM_010197	ENSMUSG00000036585	Fgf1	Dffrx|Fam|Fgf-1|Fgfa	fibroblast growth factor 1	protein-coding
chr9	64179134	64179694	+	749	NA	TTS (NM_024212)	TTS (NM_024212)	117	NM_183316	330959	Mm.24082	NM_183316	ENSMUSG00000032398	Snapc5	2010103A03Rik	small nuclear RNA activating complex, polypeptide 5	protein-coding
chr6	85868219	85868823	+	580	NA	intron (NM_053096, intron 2 of 2)	intron (NM_053096, intron 2 of 2)	616	NM_053096	93673	Mm.24251	NM_053096	ENSMUSG00000033634	Nat8f2	Cml2	N-acetyltransferase 8 (GCN5-related) family member 2	protein-coding
chr17	35258222	35258487	+	621	NA	Intergenic	Intergenic	-4740	NM_010380	14964	Mm.439675	NM_010380	ENSMUSG00000073411	H2-D1	H-2D|H2-D|H2-K1	histocompatibility 2, D region locus 1	protein-coding
chr3	108383680	108383923	+	625	NA	promoter-TSS (NM_019976)	promoter-TSS (NM_019976)	-3	NM_001190161	56742	Mm.389499	NM_019976	ENSMUSG00000068744	Psrc1	5430413I02Rik|AL033312|Dda3	proline/serine-rich coiled-coil 1	protein-coding
chr15	35937876	35938330	+	669	NA	intron (NM_053071, intron 1 of 3)	CpG	143	NM_053071	12864	Mm.548	NM_053071	ENSMUSG00000014313	Cox6c	-	cytochrome c oxidase subunit 6C	protein-coding
chr4	139716493	139716868	+	692	NA	Intergenic	Intergenic	63142	NM_031873	83770	Mm.190612	NM_031873	ENSMUSG00000028738	Tas1r2	Gpr71|T1r2|TR2	taste receptor, type 1, member 2	protein-coding
chr2	152766393	152766775	+	746	NA	intron (NM_001289739, intron 3 of 4)	intron (NM_001289739, intron 3 of 4)	12411	NM_053091	84682	Mm.196668	NM_053091	ENSMUSG00000009876	Cox4i2	Cox4b|CoxIV-2	cytochrome c oxidase subunit 4I2	protein-coding
chr9	109037979	109039417	+	572	NA	exon (NM_001284332, exon 1 of 6)	exon (NM_001284332, exon 1 of 6)	131	NM_025858	66940	Mm.196533	NM_025858	ENSMUSG00000025647	Shisa5	2310008D10Rik|6430628I05Rik|Scotin|mShisa5	shisa family member 5	protein-coding
chr7	140792399	140792718	+	564	NA	Intergenic	RMER1A|Other|Other	-4704	NM_001143765	74075	Mm.46102	NM_001143765	ENSMUSG00000025480	Syce1	4933406J07Rik	synaptonemal complex central element protein 1	protein-coding
chr13	48878534	48878905	+	707	NA	TTS (NM_001033268)	TTS (NM_001033268)	-7834	NM_011078	18676	Mm.486213	NM_011078	ENSMUSG00000038025	Phf2	GRC5	PHD finger protein 2	protein-coding
chrX	7573994	7574928	+	888	NA	promoter-TSS (NM_138605)	promoter-TSS (NM_138605)	-180	NM_138605	54646	Mm.148163	NM_138605	ENSMUSG00000039556	Ppp1r3f	DXImx48e|R3F|RF3|Sfc15	protein phosphatase 1, regulatory subunit 3F	protein-coding
chr4	148087722	148088243	+	655	NA	promoter-TSS (NM_001301281)	promoter-TSS (NM_001301281)	82	NM_009642	11610	Mm.46247	NM_009642	ENSMUSG00000029007	Agtrap	3300002E14Rik|AT1R|Atrap|D4Wsu124e	angiotensin II, type I receptor-associated protein	protein-coding
chr14	8080134	8080721	+	876	NA	5' UTR (NM_025938, exon 1 of 6)	5' UTR (NM_025938, exon 1 of 6)	114	NM_001348727	109729085	Mm.210048	NM_001348727		Htd2	-	hydroxyacyl-thioester dehydratase type 2	protein-coding
chr2	170496966	170497655	+	686	NA	promoter-TSS (NM_009996)	promoter-TSS (NM_009996)	-165	NM_009996	13081	Mm.6575	NM_009996	ENSMUSG00000038567	Cyp24a1	24-OHase|CP24|Cyp24	cytochrome P450, family 24, subfamily a, polypeptide 1	protein-coding
chr11	120727000	120727441	+	590	NA	promoter-TSS (NM_026428)	promoter-TSS (NM_026428)	64	NM_026428	67880	Mm.231091	NM_026428	ENSMUSG00000039450	Dcxr	0610038K04Rik|1810027P18Rik|XR	dicarbonyl L-xylulose reductase	protein-coding
chr8	3621164	3621594	+	1000	NA	promoter-TSS (NM_026156)	promoter-TSS (NM_026156)	-83	NM_026156	67439	Mm.23739	NM_026156	ENSMUSG00000019470	Xab2	0610041O14Rik|AV025587	XPA binding protein 2	protein-coding
chr8	123224707	123224961	+	871	NA	promoter-TSS (NM_194446)	promoter-TSS (NM_194446)	-7	NM_194446	234854	Mm.190984	NM_194444	ENSMUSG00000033862	Cdk10	BC017131	cyclin-dependent kinase 10	protein-coding
chr3	14381742	14382039	+	722	NA	Intergenic	Intergenic	18773	NR_033591	622229	Mm.486084	NR_033591		Gm6300	EG622229	solute carrier family 7 (cationic amino acid transporter, y+ system), member pseudogene	pseudo
chr1	71652622	71653890	+	1000	NA	promoter-TSS (NM_001276412)	promoter-TSS (NM_001276412)	-22	NM_001276408	14268	Mm.193099	NM_010233	ENSMUSG00000026193	Fn1	E330027I09|Fn|Fn-1	fibronectin 1	protein-coding
chr9	57708791	57709011	+	724	NA	intron (NM_153799, intron 1 of 6)	CpG	332	NM_153799	353190	Mm.268104	NM_153799	ENSMUSG00000038957	Edc3	AA517853|Lsm16|Yjdc	enhancer of mRNA decapping 3	protein-coding
chr1	18323168	18323680	+	603	NA	Intergenic	RMER17B|LTR|ERVK	-58286	NM_001040027	77673	Mm.99530	NM_183124	ENSMUSG00000067773	Defb41	9230102D03Rik|BD-17|Bd-41|Defb16|Defb17|Gm15386	defensin beta 41	protein-coding
chr6	71313036	71313698	+	612	NA	Intergenic	Intergenic	-9421	NM_009858	12526	Mm.333148	NM_009858	ENSMUSG00000053044	Cd8b1	Cd8b|Ly-3|Ly-C|Lyt-3	CD8 antigen, beta chain 1	protein-coding
chr4	134510888	134511322	+	671	NA	TTS (NM_001285845)	TTS (NM_001285845)	106	NM_001081099	69885	Mm.141592	NM_001081099	ENSMUSG00000078521	Aunip	2610002D18Rik|Clhc1	aurora kinase A and ninein interacting protein	protein-coding
chr2	129800307	129801128	+	950	NA	exon (NM_001038635, exon 1 of 3)	exon (NM_001038635, exon 1 of 3)	200	NM_183262	67333	Mm.389329	NM_183262	ENSMUSG00000037885	Stk35	1700054C12Rik|CLIK1|Stk35l1	serine/threonine kinase 35	protein-coding
chr13	22006354	22006579	+	553	NA	intron (NM_019429, intron 7 of 11)	intron (NM_019429, intron 7 of 11)	3275	NM_019429	54373	Mm.32043	NM_019429	ENSMUSG00000006179	Prss16	AI448615|TSSP	protease, serine 16 (thymus)	protein-coding
chr5	108668953	108669559	+	787	NA	TTS (NM_001310692)	TTS (NM_001310692)	5540	NM_001310692	231583	Mm.440571	NM_174870	ENSMUSG00000046959	Slc26a1	Sat1	solute carrier family 26 (sulfate transporter), member 1	protein-coding
chr4	43025459	43025967	+	639	NA	promoter-TSS (NM_020035)	promoter-TSS (NM_020035)	61	NM_020035	56703	Mm.143738	NM_020035	ENSMUSG00000028454	Pigo	PIG-O	phosphatidylinositol glycan anchor biosynthesis, class O	protein-coding
chr11	68901286	68901874	+	900	NA	promoter-TSS (NR_003373)	promoter-TSS (NR_003373)	-9	NR_003373	100034726	Mm.3229	NR_003373	ENSMUSG00000062353	Gm15772	Rpl26|SIG-20	ribosomal protein L26 pseudogene	pseudo
chr8	72570598	72571502	+	1000	NA	promoter-TSS (NM_144534)	promoter-TSS (NM_144534)	-2	NM_172396	66818	Mm.22565	NM_172396	ENSMUSG00000044600	Smim7	9130011J15Rik	small integral membrane protein 7	protein-coding
chr12	113075188	113075400	+	714	NA	TTS (NM_001291445)	TTS (NM_001291445)	792	NM_029381	75671	Mm.23377	NM_029381	ENSMUSG00000012211	Tex22	1700028O09Rik|AV210422|Tep22	testis expressed gene 22	protein-coding
chr4	42184364	42185321	+	736	NA	intron (NR_033123, intron 2 of 4).2	CpG	-16238	NM_001100596	100038993	Mm.458019	NM_001100596	ENSMUSG00000095623	Gm2002	-	predicted gene 2002	protein-coding
chr11	58816782	58817313	+	680	NA	exon (NM_146536, exon 1 of 1)	exon (NM_146536, exon 1 of 1)	119	NM_146536	258529	Mm.377555	NM_146536	ENSMUSG00000070438	Olfr313	MOR222-2	olfactory receptor 313	protein-coding
chr15	99505459	99506094	+	601	NA	intron (NM_001038658, intron 11 of 11)	intron (NM_001038658, intron 11 of 11)	22389	NM_001038658	72393	Mm.39760	NM_028224	ENSMUSG00000023011	Faim2	2900002L20Rik|Lfg|Lfg2|NMP25|Nmp35|Tmbim2	Fas apoptotic inhibitory molecule 2	protein-coding
chr7	63212075	63212738	+	564	NA	intron (NM_007390, intron 1 of 9)	CpG-13190	120	NM_007390	11441	Mm.113464	NM_007390	ENSMUSG00000030525	Chrna7	Acra7|alpha7|nAchR	cholinergic receptor, nicotinic, alpha polypeptide 7	protein-coding
chr2	127335845	127336690	+	830	NA	exon (NM_010090, exon 1 of 4)	exon (NM_010090, exon 1 of 4)	108	NM_010090	13537	Mm.4729	NM_010090	ENSMUSG00000027368	Dusp2	PAC1	dual specificity phosphatase 2	protein-coding
chr15	101454685	101455069	+	594	NA	TTS (NM_025487)	TTS (NM_025487)	7132	NM_025487	66322	Mm.158111	NM_025487	ENSMUSG00000063971	Krt88	1700011A15Rik	keratin 88	protein-coding
chr14	56811198	56812252	+	1000	NA	promoter-TSS (NM_144842)	promoter-TSS (NM_144842)	-9	NR_136882	219105	Mm.473172	NM_144842	ENSMUSG00000040123	Zmym5	9830124H08Rik	zinc finger, MYM-type 5	protein-coding
chr15	73919196	73919985	+	662	NA	Intergenic	Intergenic	-79919	NM_001033365	268816	Mm.440635	NM_001033365	ENSMUSG00000072487	Mroh5	Gm628	maestro heat-like repeat family member 5	protein-coding
chr6	38481803	38482302	+	601	NA	intron (NM_177185, intron 9 of 16)	intron (NM_177185, intron 9 of 16)	-25273	NR_106130	102466843		NR_106130	ENSMUSG00000098285	Mir7670	Gm27707|mmu-mir-7670	microRNA 7670	ncRNA
chr10	20220717	20221125	+	679	NA	intron (NM_001358787, intron 1 of 17)	intron (NM_001358787, intron 1 of 17)	12482	NM_001101561	621697	Mm.440587	NM_001101561		Rpl32l	EG621697|Gm6251	ribosomal protein L32-like	protein-coding
chr2	127433507	127434588	+	652	NA	intron (NM_001081089, intron 15 of 21)	intron (NM_001081089, intron 15 of 21)	8848	NM_001081089	215456	Mm.440454	NM_001081089	ENSMUSG00000046338	Gpat2	A530057A03Rik|Gm116|xGPAT1	glycerol-3-phosphate acyltransferase 2, mitochondrial	protein-coding
chr7	80269584	80270147	+	590	NA	5' UTR (NM_178070, exon 1 of 23)	5' UTR (NM_178070, exon 1 of 23)	210	NM_178070	233405	Mm.322870	NM_178070	ENSMUSG00000030534	Vps33b	-	vacuolar protein sorting 33B	protein-coding
chr5	90785726	90786697	+	579	NA	exon (NM_203320, exon 1 of 4)	exon (NM_203320, exon 1 of 4)	110	NM_203320	330122	Mm.244289	NM_203320	ENSMUSG00000029379	Cxcl3	Dcip1|Gm1960	chemokine (C-X-C motif) ligand 3	protein-coding
chr19	60861302	60861565	+	631	NA	promoter-TSS (NM_053198)	promoter-TSS (NM_053198)	-5	NM_053198	94281	Mm.48179	NM_053198	ENSMUSG00000063698	Sfxn4	-	sideroflexin 4	protein-coding
chr7	44952385	44953109	+	823	NA	exon (NM_011651, exon 6 of 11)	exon (NM_011651, exon 6 of 11)	9507	NM_001077591	22116	Mm.84502	NM_011651	ENSMUSG00000059891	Tsks	Stk22s1|Tssks1	testis-specific serine kinase substrate	protein-coding
chr17	56584119	56585076	+	1000	NA	promoter-TSS (NM_001163300)	promoter-TSS (NM_001163300)	-12	NM_001355463	224902	Mm.214973	NM_001029979	ENSMUSG00000042625	Safb2	AA389433|AI255170|mKIAA0138	scaffold attachment factor B2	protein-coding
chr11	74371553	74372004	+	562	NA	Intergenic	Intergenic	7107	NM_001011851	258153	Mm.376124	NM_001011851	ENSMUSG00000058275	Olfr412	MOR127-5P	olfactory receptor 412	protein-coding
chr9	97017989	97019164	+	693	NA	promoter-TSS (NM_145134)	promoter-TSS (NM_145134)	-221	NM_145134	211949	Mm.491271	NM_145134	ENSMUSG00000046997	Spsb4	D030068E18Rik|SSB-4|Ssb4	splA/ryanodine receptor domain and SOCS box containing 4	protein-coding
chr6	13288387	13288904	+	606	NA	Intergenic	MLT1G3|LTR|ERVL-MaLR	-63680	NM_001013757	232585	Mm.389082	NM_001013757	ENSMUSG00000079679	Vwde	Gm467	von Willebrand factor D and EGF domains	protein-coding
chr13	37557192	37557480	+	644	NA	Intergenic	Intergenic	211991	NM_010745	17084	Mm.2639	NM_010745	ENSMUSG00000021423	Ly86	MD-1|MD1|ly86_tv2	lymphocyte antigen 86	protein-coding
chr10	70244601	70245916	+	605	NA	promoter-TSS (NM_025807)	promoter-TSS (NM_025807)	-18	NM_025807	66859	Mm.19325	NM_025807	ENSMUSG00000037762	Slc16a9	1200003C15Rik|4930425B13Rik|AI552636	solute carrier family 16 (monocarboxylic acid transporters), member 9	protein-coding
chr9	21592717	21593504	+	550	NA	promoter-TSS (NM_001205157)	promoter-TSS (NM_001205157)	-279	NM_001359299	74766	Mm.475712	NM_138303	ENSMUSG00000032182	Yipf2	1300010K09Rik	Yip1 domain family, member 2	protein-coding
chr2	143545617	143546338	+	558	NA	promoter-TSS (NM_008792)	promoter-TSS (NM_008792)	-156	NM_008792	18549	Mm.294493	NM_008792	ENSMUSG00000027419	Pcsk2	6330411F23Rik|AI839700|Nec-2|Nec2|PC2|Phpp-2|SPC2	proprotein convertase subtilisin/kexin type 2	protein-coding
chr4	49520624	49521711	+	1000	NA	promoter-TSS (NM_145547)	promoter-TSS (NM_145547)	-9	NM_145547	230162	Mm.186994	NM_145547	ENSMUSG00000039634	Zfp189	BB131811|C430015I23Rik	zinc finger protein 189	protein-coding
chr12	36156243	36157551	+	1000	NA	promoter-TSS (NM_146033)	promoter-TSS (NM_146033)	-72	NM_025840	66912	Mm.288669	NM_025840	ENSMUSG00000020547	Bzw2	1110001I24Rik|Bdm2|HSPC028	basic leucine zipper and W2 domains 2	protein-coding
chr6	83156257	83156509	+	798	NA	promoter-TSS (NM_001362119)	promoter-TSS (NM_001362119)	-4	NM_001362119	75659	Mm.130665	NM_023790	ENSMUSG00000030032	Wdr54	1700030E05Rik	WD repeat domain 54	protein-coding
chr4	12906672	12907328	+	1000	NA	intron (NM_173746, intron 1 of 4)	CpG	163	NM_001171801	208820	Mm.12057	NM_173746	ENSMUSG00000055963	Triqk	C130086A10|Gm11818	triple QxxK/R motif containing	protein-coding
chr15	80024421	80024878	+	574	NA	Intergenic	Intergenic	-9672	NM_011057	18591	Mm.144089	NM_011057	ENSMUSG00000000489	Pdgfb	PDGF-2|PDGF-B|Sis|c-sis	platelet derived growth factor, B polypeptide	protein-coding
chr12	5446075	5446375	+	580	NA	Intergenic	RMER1B|Other|Other	70505	NR_015579	72669	Mm.10434	NM_028318		2810032G03Rik	AI461720	RIKEN cDNA 2810032G03 gene	ncRNA
chr11	58867159	58867480	+	736	NA	promoter-TSS (NM_172403)	promoter-TSS (NM_172403)	79	NM_172403	69944	Mm.32118	NM_172403	ENSMUSG00000020491	2810021J22Rik	AI449137	RIKEN cDNA 2810021J22 gene	protein-coding
chr6	91829018	91829335	+	613	NA	Intergenic	Intergenic	-21783	NM_001159507	243547	Mm.333264	NM_001033353	ENSMUSG00000030098	Grip2	-	glutamate receptor interacting protein 2	protein-coding
chr19	12401139	12401376	+	806	NA	intron (NR_030566, intron 3 of 3)	RMER6C|LTR|ERVK	6992	NM_146684	258679	Mm.271520	NM_146684	ENSMUSG00000046650	Olfr1440	MOR215-1	olfactory receptor 1440	protein-coding
chr4	108071317	108071749	+	977	NA	intron (NM_011327, intron 11 of 15)	intron (NM_011327, intron 11 of 15)	-15824	NR_105823	102465213		NR_105823	ENSMUSG00000098980	Mir6397	Gm28004|mmu-mir-6397	microRNA 6397	ncRNA
chr9	47703219	47703794	+	650	NA	intron (NM_001025600, intron 1 of 8)	intron (NM_001025600, intron 1 of 8)	114702	NR_046048	100038460	Mm.447649	NR_046048		Gm10677	-	predicted gene 10677	ncRNA
chr9	56505929	56506788	+	652	NA	Intergenic	Intergenic	87739	NM_025812	66867	Mm.150856	NM_025812	ENSMUSG00000032329	Hmg20a	1200004E06Rik|5730490E10Rik|Hmgxb1|Ibraf	high mobility group 20A	protein-coding
chr11	11844373	11844927	+	579	NA	intron (NM_001190448, intron 7 of 14)	intron (NM_001190448, intron 7 of 14)	-23473	NR_045178	73321	Mm.443306	NR_045178	ENSMUSG00000086391	1700042O10Rik	-	RIKEN cDNA 1700042O10 gene	ncRNA
chr8	107096196	107096710	+	833	NA	promoter-TSS (NM_001286200)	promoter-TSS (NM_001286200)	92	NR_104410	21750	Mm.6402	NM_009353	ENSMUSG00000031921	Terf2	TRF2	telomeric repeat binding factor 2	protein-coding
chr11	99879252	99879760	+	633	NA	exon (NM_001101613, exon 1 of 1)	exon (NM_001101613, exon 1 of 1)	319	NM_001101613	670533	Mm.459090	NM_001101613	ENSMUSG00000059845	Gm11567	-	predicted gene 11567	protein-coding
chr3	107895667	107895923	+	609	NA	promoter-TSS (NM_010360)	promoter-TSS (NM_010360)	-59	NM_010360	14866	Mm.282351	NM_010360	ENSMUSG00000004032	Gstm5	-	glutathione S-transferase, mu 5	protein-coding
chr19	41980840	41981929	+	1000	NA	promoter-TSS (NM_028152)	promoter-TSS (NM_028152)	-248	NM_028152	72199	Mm.218940	NM_028152	ENSMUSG00000025159	Mms19	2410001K24Rik|2610042O15Rik|AI316855|C79368|C86341|Mms19l	MMS19 cytosolic iron-sulfur assembly component	protein-coding
chr11	103697324	103698108	+	832	NA	promoter-TSS (NM_019650)	promoter-TSS (NM_019650)	7	NM_001362854	56494	Mm.195451	NM_019650	ENSMUSG00000020946	Gosr2	2310032N09Rik|C76855|Gs27|SNARE|membrin	golgi SNAP receptor complex member 2	protein-coding
chr4	130297279	130297496	+	547	NA	Intergenic	Intergenic	-11351	NM_010174	14077	Mm.388886	NM_010174	ENSMUSG00000028773	Fabp3	Fabph-1|Fabph-4|Fabph1|Fabph4|H-FABP|Mdgi	fatty acid binding protein 3, muscle and heart	protein-coding
chr1	60097877	60098780	+	1000	NA	promoter-TSS (NM_001285463)	promoter-TSS (NM_001285463)	81	NM_001285463	241066	Mm.276441	NM_139150	ENSMUSG00000026017	Carf	Als2cr8|ECBRC-FC1|ECBRC-FC2	calcium response factor	protein-coding
chr11	59505250	59506821	+	759	NA	non-coding (NR_015585, exon 1 of 5)	non-coding (NR_015585, exon 1 of 5)	382	NR_015585	74476	Mm.440257	NR_015585	ENSMUSG00000072893	4933439C10Rik	2610028M21Rik	RIKEN cDNA 4933439C10 gene	ncRNA
chr10	41490249	41490710	+	735	NA	promoter-TSS (NM_028430)	promoter-TSS (NM_028430)	40	NM_028430	73075	Mm.359762	NM_028430	ENSMUSG00000078451	Ppil6	2900084F20Rik	peptidylprolyl isomerase (cyclophilin)-like 6	protein-coding
chr9	49485715	49486299	+	554	NA	intron (NM_172770, intron 1 of 21)	intron (NM_172770, intron 1 of 21)	218	NM_172770	235330	Mm.177413	NM_172770	ENSMUSG00000040219	Ttc12	E330017O07Rik	tetratricopeptide repeat domain 12	protein-coding
chr15	102331500	102332176	+	547	NA	TTS (NM_027044)	TTS (NM_027044)	129	NM_021713	60315	Mm.251638	NM_021713	ENSMUSG00000001285	Myg1	0610023A07Rik|2810433J21Rik|5830429P19Rik|AI325965|Gamm1	melanocyte proliferating gene 1	protein-coding
chr15	79176951	79177180	+	727	NA	intron (NR_029470, intron 2 of 4)	intron (NR_029470, intron 2 of 4)	10999	NR_029470	100041655	Mm.483310	NR_029470	ENSMUSG00000075555	Gm10863	-	predicted gene 10863	ncRNA
chr6	143475470	143476117	+	590	NA	Intergenic	Intergenic	59715	NR_155418	75904	Mm.414916	NR_155418	ENSMUSG00000084971	4930579D09Rik	-	RIKEN cDNA 4930579D09 gene	ncRNA
chr10	29030019	29030609	+	741	NA	Intergenic	Intergenic	-44008	NM_026336	67719	Mm.440480	NM_026336	ENSMUSG00000015519	2310057J18Rik	2210414P04Rik|Leg1	RIKEN cDNA 2310057J18 gene	protein-coding
chr11	53737089	53737844	+	581	NA	Intergenic	Intergenic	16672	NM_010558	16191	Mm.4461	NM_010558	ENSMUSG00000036117	Il5	Il-5	interleukin 5	protein-coding
chr5	147388574	147389003	+	635	NA	intron (NM_010229, intron 1 of 23)	RMER15|LTR|ERVL	11701	NM_010229	14255	Mm.194	NM_010229	ENSMUSG00000042817	Flt3	B230315G04|CD135|Flk-2|Flk2|Flt-3|Ly72|wmfl	FMS-like tyrosine kinase 3	protein-coding
chr13	60936492	60936800	+	870	NA	promoter-TSS (NM_001145799)	promoter-TSS (NM_001145799)	-21	NM_007796	13024	Mm.482089	NM_007796	ENSMUSG00000044258	Ctla2a	Ctla-2a	cytotoxic T lymphocyte-associated protein 2 alpha	protein-coding
chr13	90922703	90922902	+	772	NA	promoter-TSS (NM_024175)	promoter-TSS (NM_024175)	-320	NM_024175	66475	Mm.306302	NM_024175	ENSMUSG00000049517	Rps23	2410044J15Rik	ribosomal protein S23	protein-coding
chr12	84772755	84773767	+	1000	NA	promoter-TSS (NM_028863)	promoter-TSS (NM_028863)	-9	NM_028863	74316	Mm.25719	NM_028863	ENSMUSG00000021241	Isca2	0710001C05Rik|5730594E03Rik|Hbld1	iron-sulfur cluster assembly 2	protein-coding
chr4	149445100	149445847	+	898	NA	Intergenic	CpG	9495	NM_022020	63954	Mm.46023	NM_022020	ENSMUSG00000028996	Rbp7	1110002J23Rik|CRBP-III	retinol binding protein 7, cellular	protein-coding
chr9	65605519	65605796	+	661	NA	Intergenic	Intergenic	18483	NM_172453	208084	Mm.211032	NM_172453	ENSMUSG00000041064	Pif1	4631410M14|AI449441	PIF1 5'-to-3' DNA helicase	protein-coding
chr11	3648493	3649799	+	1000	NA	promoter-TSS (NM_001159288)	promoter-TSS (NM_001159288)	-291	NM_001363202	74522	Mm.139127	NM_198162	ENSMUSG00000034543	Morc2a	8430403M08Rik|Zcwcc1	microrchidia 2A	protein-coding
chr4	62524959	62525587	+	741	NA	promoter-TSS (NM_177607)	promoter-TSS (NM_177607)	-96	NM_001356420	214106	Mm.73212	NM_177607	ENSMUSG00000058046	4933430I17Rik	bN189G18.7	RIKEN cDNA 4933430I17 gene	protein-coding
chr17	12118943	12119341	+	663	NA	promoter-TSS (NM_026644)	promoter-TSS (NM_026644)	-142	NM_026644	68262	Mm.258300	NM_026644	ENSMUSG00000023827	Agpat4	1500003P24Rik	1-acylglycerol-3-phosphate O-acyltransferase 4 (lysophosphatidic acid acyltransferase, delta)	protein-coding
chr9	56937399	56938010	+	931	NA	exon (NM_133976, exon 1 of 1)	exon (NM_133976, exon 1 of 1)	204	NM_133976	102462	Mm.12864	NM_133976	ENSMUSG00000032288	Imp3	1190002L16Rik|AI256594	IMP3, U3 small nucleolar ribonucleoprotein	protein-coding
chr14	16249122	16249663	+	1000	NA	promoter-TSS (NM_001359882)	promoter-TSS (NM_001359882)	78	NM_001362432	59007	Mm.258381	NM_021504	ENSMUSG00000021785	Ngly1	1110002C09Rik|PNGase|Png1	N-glycanase 1	protein-coding
chr2	178414092	178415167	+	745	NA	promoter-TSS (NM_001085501)	promoter-TSS (NM_001085501)	95	NM_001081289	71532	Mm.40216	NM_001081289	ENSMUSG00000070476	Fam217b	9030418K01Rik|AI851938	family with sequence similarity 217, member B	protein-coding
chr5	24425083	24425361	+	778	NA	promoter-TSS (NM_009207)	promoter-TSS (NM_009207)	-10	NM_009207	20535	Mm.4580	NM_009207	ENSMUSG00000028962	Slc4a2	Ae2|B3RP	solute carrier family 4 (anion exchanger), member 2	protein-coding
chr16	4719260	4719500	+	653	NA	promoter-TSS (NM_026393)	promoter-TSS (NM_026393)	-24	NM_001290763	67824	Mm.28451	NM_026393	ENSMUSG00000063445	Nmral1	1110025F24Rik|AI256624	NmrA-like family domain containing 1	protein-coding
chr2	172370504	172371228	+	1000	NA	promoter-TSS (NM_024199)	promoter-TSS (NM_024199)	-137	NM_024199	67337	Mm.26944	NM_024199	ENSMUSG00000027498	Cstf1	1700057K18Rik|AI788832	cleavage stimulation factor, 3' pre-RNA, subunit 1	protein-coding
chr13	34344603	34345570	+	664	NA	promoter-TSS (NM_001033167)	promoter-TSS (NM_001033167)	96	NM_001033167	73102	Mm.23932	NM_001033167	ENSMUSG00000038267	Slc22a23	3110004L20Rik	solute carrier family 22, member 23	protein-coding
chr16	37539643	37540205	+	1000	NA	promoter-TSS (NM_001042499)	promoter-TSS (NM_001042499)	30	NM_001042499	67657	Mm.28158	NM_026297	ENSMUSG00000022827	Rabl3	4930553C05Rik|AA958834	RAB, member RAS oncogene family-like 3	protein-coding
chr15	75703976	75704526	+	675	NA	promoter-TSS (NM_001163465)	promoter-TSS (NM_001163465)	-37	NM_001163465	14787	Mm.57052	NM_008164	ENSMUSG00000022580	Rhpn1	BB023497|Grbp|Rhophilin|mKIAA1929	rhophilin, Rho GTPase binding protein 1	protein-coding
chr6	48554626	48555014	+	668	NA	promoter-TSS (NM_001110160)	promoter-TSS (NM_001110160)	21	NM_001110160	243371	Mm.290764	NM_177736	ENSMUSG00000073096	Lrrc61	BC027309	leucine rich repeat containing 61	protein-coding
chr1	97769650	97770564	+	1000	NA	promoter-TSS (NM_001310773)	promoter-TSS (NM_001310773)	-15	NM_173760	227399	Mm.220817	NM_173760	ENSMUSG00000040648	Ppip5k2	AW555814|Cfap160|D330021B20|Hisppd1|Vip2|mKIAA0433	diphosphoinositol pentakisphosphate kinase 2	protein-coding
chr8	26118946	26119871	+	1000	NA	promoter-TSS (NM_207659)	promoter-TSS (NM_207659)	40	NM_001357292	77733	Mm.291906	NM_029965	ENSMUSG00000013878	Rnf170	6720407G21Rik|AI481227	ring finger protein 170	protein-coding
chr2	76406314	76407270	+	587	NA	intron (NM_145525, intron 1 of 26)	CpG	284	NM_001290733	99031	Mm.240435	NM_145525	ENSMUSG00000042359	Osbpl6	1110062M20Rik|AI596402|ORP-6|mKIAA4128	oxysterol binding protein-like 6	protein-coding
chr9	37833490	37833821	+	711	NA	Intergenic	Intergenic	-21165	NM_146417	258412	Mm.115804	NM_146417	ENSMUSG00000066749	Olfr877	MOR161-5	olfactory receptor 877	protein-coding
chr13	100492292	100492591	+	566	NA	promoter-TSS (NR_153794)	promoter-TSS (NR_153794)	-47	NR_153794	23894	Mm.272533	NM_022011	ENSMUSG00000021639	Gtf2h2	44kDa|BTF2 p44|BTF2-p44|Btf2p44|p44	general transcription factor II H, polypeptide 2	protein-coding
chrX	7670382	7671515	+	566	NA	intron (NM_019755, intron 1 of 4)	intron (NM_019755, intron 1 of 4)	442	NM_019755	18824	Mm.18565	NM_019755	ENSMUSG00000031146	Plp2	mIMA4	proteolipid protein 2	protein-coding
chr4	134974973	134975838	+	586	NA	Intergenic	Intergenic	44425	NM_026780	68592	Mm.29989	NM_026780	ENSMUSG00000028821	Syf2	1110018L13Rik|Cbpin|D4Bwg1551e|Gcipip|Ntc31|mp29|p29	SYF2 homolog, RNA splicing factor (S. cerevisiae)	protein-coding
chr9	35559343	35559582	+	737	NA	promoter-TSS (NM_013932)	promoter-TSS (NM_013932)	902	NM_023292	67049	Mm.425574	NM_023292	ENSMUSG00000032103	Pus3	2610020J05Rik|5730412F04Rik	pseudouridine synthase 3	protein-coding
chr4	134128513	134129135	+	632	NA	promoter-TSS (NM_080559)	promoter-TSS (NM_080559)	-91	NM_080559	73723	Mm.22240	NM_080559	ENSMUSG00000028843	Sh3bgrl3	1110004L05Rik|AU022188	SH3 domain binding glutamic acid-rich protein-like 3	protein-coding
chr13	83715047	83715299	+	644	NA	Intergenic	Intergenic	-6208	NR_152244	320203	Mm.245636	NM_177100	ENSMUSG00000050334	C130071C03Rik	2810449C10Rik|ECONEXIN|EyeLinc1|Visc-1	RIKEN cDNA C130071C03 gene	ncRNA
chr15	78927956	78928442	+	872	NA	intron (NM_008495, intron 2 of 3)	CpG	1474	NM_008495	16852	Mm.43831	NM_008495	ENSMUSG00000068220	Lgals1	AA410090|Gal-1|Galbp|L-14.5|L14|Lect14|galectin-1	lectin, galactose binding, soluble 1	protein-coding
chr3	103682472	103682771	+	636	NA	Intergenic	Intergenic	55380	NM_133859	99543	Mm.211535	NM_133859	ENSMUSG00000027848	Olfml3	2810002E22Rik|AI115209|AW550633|HNOEL-iso|ONT3|mONT3	olfactomedin-like 3	protein-coding
chr19	8798365	8798710	+	721	NA	promoter-TSS (NM_026329)	promoter-TSS (NM_026329)	20	NM_026329	67710	Mm.22117	NM_026329	ENSMUSG00000071662	Polr2g	2410046K11Rik|A230108L04Rik|C76415|RBP7|Rpo2-7l	polymerase (RNA) II (DNA directed) polypeptide G	protein-coding
chr9	73039273	73039909	+	749	NA	promoter-TSS (NM_001308425)	promoter-TSS (NM_001308425)	108	NM_018889	55981	Mm.139905	NM_018889	ENSMUSG00000079469	Pigb	Pig-b	phosphatidylinositol glycan anchor biosynthesis, class B	protein-coding
chr1	75191658	75192463	+	1000	NA	promoter-TSS (NM_026187)	promoter-TSS (NM_026187)	-50	NM_001288612	245860	Mm.238266	NM_001003917	ENSMUSG00000033124	Atg9a	AU019532|Apg9l1|Atg9|Atg9l1	autophagy related 9A	protein-coding
chr15	33083008	33083326	+	665	NA	promoter-TSS (NM_018755)	promoter-TSS (NM_018755)	38	NM_176073	54381	Mm.158251	NM_018755	ENSMUSG00000039007	Cpq	1190003P12Rik|2610034C17Rik|Hls2|Lal-1|Pgcp	carboxypeptidase Q	protein-coding
chr1	158852844	158853524	+	640	NA	intron (NM_001085376, intron 6 of 22)	intron (NM_001085376, intron 6 of 22)	104991	NM_001085376	23850	Mm.458621	NM_001085376	ENSMUSG00000073530	Pappa2	PAPP-A2|PLAC3|Pappe	pappalysin 2	protein-coding
chr17	57060296	57060769	+	565	NA	promoter-TSS (NM_025877)	promoter-TSS (NM_025877)	-669	NM_025877	66972	Mm.23720	NM_025877	ENSMUSG00000046329	Slc25a23	2310067G05Rik|SCaMC-3	solute carrier family 25 (mitochondrial carrier; phosphate carrier), member 23	protein-coding
chr17	27856341	27857101	+	889	NA	5' UTR (NM_001080769, exon 1 of 21)	5' UTR (NM_001080769, exon 1 of 21)	214	NM_001080769	224648	Mm.291291	NM_001080769	ENSMUSG00000039512	Uhrf1bp1	1110020K19Rik|AA408674|F830021D11Rik|mKIAA4127	UHRF1 (ICBP90) binding protein 1	protein-coding
chr10	7113780	7114150	+	870	NA	Intergenic	Intergenic	-90780	NM_001033391	320495	Mm.331674	NM_001033391	ENSMUSG00000064065	Ipcef1	A130090K04Rik	interaction protein for cytohesin exchange factors 1	protein-coding
chr6	58335969	58336292	+	551	NA	Intergenic	Lx2B2|LINE|L1	28833	NM_053232	113859	Mm.377156	NM_053232	ENSMUSG00000091734	Vmn1r29	V1rc2	vomeronasal 1 receptor 29	protein-coding
chr1	136415106	136415746	+	1000	NA	promoter-TSS (NR_024328)	promoter-TSS (NR_024328)	93	NR_024328	320054	Mm.208000	NR_024328	ENSMUSG00000097403	9230116N13Rik	-	RIKEN cDNA 9230116N13 gene	ncRNA
chr5	139371955	139372431	+	626	NA	intron (NM_028469, intron 2 of 4)	CpG	-2448	NR_029768	723898		NR_029768	ENSMUSG00000065593	Mir339	Mirn339|mir-339|mmu-mir-339	microRNA 339	ncRNA
chr9	103432183	103432703	+	543	NA	intron (NR_040466, intron 5 of 5)	LTR16A1|LTR|ERVL	8865	NR_040466	100529079	Mm.437003	NR_040466	ENSMUSG00000086236	5830418P13Rik	-	RIKEN cDNA 5830418P13 gene	ncRNA
chr10	107437617	107438206	+	608	NA	Intergenic	IMPB_01|Satellite|Satellite	48223	NM_008656	17877	Mm.4984	NM_008656	ENSMUSG00000000435	Myf5	B130010J22Rik|Myf-5|bHLHc2	myogenic factor 5	protein-coding
chr1	173912650	173913711	+	820	NA	promoter-TSS (NM_001301745)	promoter-TSS (NM_001301745)	-134	NM_001033450	381308	Mm.490248	NM_001033450	ENSMUSG00000026536	Ifi211	A730048F03|Ifi205b|Mnda|ifi-205-B	interferon activated gene 211	protein-coding
chr3	95427548	95427955	+	550	NA	intron (NR_033637, intron 1 of 2)	CpG	402	NR_033637	100043305	Mm.412052	NR_033637		Gm4349	-	SET domain, bifurcated 1 pseudogene	pseudo
chr11	115564128	115564722	+	705	NA	promoter-TSS (NM_001002929)	promoter-TSS (NM_001002929)	-19	NM_001002929	445007	Mm.4379	NM_001002929	ENSMUSG00000020739	Nup85	Pcnt1|frount	nucleoporin 85	protein-coding
chr4	135727879	135728292	+	837	NA	promoter-TSS (NM_178257)	promoter-TSS (NM_178257)	-74	NM_178257	230828	Mm.261647	NM_178257	ENSMUSG00000037157	Il22ra1	9130219A07Rik|IL-22R|Il22r	interleukin 22 receptor, alpha 1	protein-coding
chrX	12822796	12823117	+	596	NA	Intergenic	Intergenic	60678	NR_045852	552913	Mm.216846	NR_045852	ENSMUSG00000085891	Gm14634	-	predicted gene 14634	ncRNA
chr11	60454437	60455045	+	644	NA	exon (NM_021354, exon 1 of 13)	exon (NM_021354, exon 1 of 13)	150	NM_021354	13495	Mm.41803	NM_021354	ENSMUSG00000020537	Drg2	AI255295|AI461605|DRG-2	developmentally regulated GTP binding protein 2	protein-coding
chr5	37823978	37824841	+	865	NA	5' UTR (NM_010835, exon 1 of 2)	5' UTR (NM_010835, exon 1 of 2)	176	NM_010835	17701	Mm.256509	NM_010835	ENSMUSG00000048450	Msx1	AA675338|AI324650|Hox-7|Hox7|Hox7.1|msh	msh homeobox 1	protein-coding
chr8	84722863	84723647	+	629	NA	intron (NM_010906, intron 6 of 8)	intron (NM_010906, intron 6 of 8)	21798	NM_008535	17095	Mm.4925	NM_008535	ENSMUSG00000034041	Lyl1	Lyl-1|bHLHa18	lymphoblastomic leukemia 1	protein-coding
chr15	78913664	78914375	+	819	NA	promoter-TSS (NM_020271)	promoter-TSS (NM_020271)	100	NM_020271	57028	Mm.263169	NM_020271	ENSMUSG00000116165	Pdxp	1600027H05Rik|AB041662|PLPP	pyridoxal (pyridoxine, vitamin B6) phosphatase	protein-coding
chr8	83783117	83783490	+	617	NA	Intergenic	Intergenic	-41992	NM_001163031	26364	Mm.334648	NM_011925	ENSMUSG00000002885	Adgre5	AA409984|Cd97|TM7LN1	adhesion G protein-coupled receptor E5	protein-coding
chr2	30415221	30416469	+	856	NA	promoter-TSS (NM_007760)	promoter-TSS (NM_007760)	-97	NM_007760	12908	Mm.20396	NM_007760	ENSMUSG00000026853	Crat	AW107812|CARAT	carnitine acetyltransferase	protein-coding
chr7	18402640	18403245	+	851	NA	Intergenic	CpG	29113	NM_054063	114871	Mm.362025	NM_054063	ENSMUSG00000030373	Psg28	cea16	pregnancy-specific glycoprotein 28	protein-coding
chr12	22030646	22031111	+	1000	NA	Intergenic	CpG	125768	NR_136920	100043416		NM_001004167	ENSMUSG00000093846	Gm4425	EG432637|Gm5433	KRAB-domain protein pseudogene	pseudo
chr6	124813961	124814347	+	766	NA	TTS (NM_001326594)	TTS (NM_001326594)	142	NM_009415	21991	Mm.4222	NM_009415	ENSMUSG00000023456	Tpi1	AI255506|TIM|Tpi|Tpi-1	triosephosphate isomerase 1	protein-coding
chr6	21214595	21215221	+	556	NA	promoter-TSS (NM_019697)	promoter-TSS (NM_019697)	-438	NM_019697	16508	Mm.425316	NM_019697	ENSMUSG00000060882	Kcnd2	AI839615|AW555701|Kv4.2|R75121	potassium voltage-gated channel, Shal-related family, member 2	protein-coding
chr2	152363458	152363673	+	560	NA	intron (NR_033505, intron 2 of 4)	intron (NR_033505, intron 2 of 4)	13040	NM_001370750	228777	Mm.330667	NM_001009948	ENSMUSG00000059361	Nrsn2	Gm123|Neurensin-2	neurensin 2	protein-coding
chr2	151876046	151876541	+	611	NA	Intergenic	Intergenic	33366	NM_001040689	228770	Mm.159868	NM_001040689	ENSMUSG00000032852	Rspo4	A730099F22|A930029K19Rik	R-spondin 4	protein-coding
chr14	25768264	25769128	+	552	NA	exon (NM_001101433, exon 1 of 4)	exon (NM_001101433, exon 1 of 4)	376	NM_001101433	71918	Mm.41904	NM_001101433	ENSMUSG00000055538	Zcchc24	2310047A01Rik	zinc finger, CCHC domain containing 24	protein-coding
chr14	31494729	31495380	+	764	NA	promoter-TSS (NM_001359850)	promoter-TSS (NM_001359850)	-14	NM_025907	67011	Mm.291731	NM_025907	ENSMUSG00000021891	Mettl6	1600013P15Rik|AI467521|AU020711	methyltransferase like 6	protein-coding
chr7	25297159	25298193	+	900	NA	5' UTR (NM_001357350, exon 1 of 5)	5' UTR (NM_001357350, exon 1 of 5)	279	NM_008776	18476	Mm.597	NM_008776	ENSMUSG00000005447	Pafah1b3	Pafahg|mus[g]	platelet-activating factor acetylhydrolase, isoform 1b, subunit 3	protein-coding
chr13	100124752	100125105	+	688	NA	promoter-TSS (NM_011420)	promoter-TSS (NM_011420)	73	NM_011420	20595	Mm.2025	NM_011420	ENSMUSG00000021645	Smn1	AI849087|Gemin1|Smn	survival motor neuron 1	protein-coding
chr11	55033162	55033644	+	977	NA	promoter-TSS (NM_013472)	promoter-TSS (NM_013472)	68	NR_138556	11749	Mm.265347	NM_013472	ENSMUSG00000018340	Anxa6	AW107198|Anx6|AnxVI|Cabm|Camb	annexin A6	protein-coding
chr8	45410160	45410709	+	601	NA	promoter-TSS (NM_001357316)	promoter-TSS (NM_001357316)	-54	NM_001357316	142980	Mm.33874	NM_126166	ENSMUSG00000031639	Tlr3	AI957183	toll-like receptor 3	protein-coding
chr4	53158666	53158964	+	623	NA	intron (NM_013454, intron 1 of 49)	intron (NM_013454, intron 1 of 49)	1080	NM_013454	11303	Mm.277376	NM_013454	ENSMUSG00000015243	Abca1	ABC-1|Abc1	ATP-binding cassette, sub-family A (ABC1), member 1	protein-coding
chr7	4943234	4943757	+	855	NA	intron (NM_173008, intron 13 of 13)	intron (NM_173008, intron 13 of 13)	17674	NM_173008	269855	Mm.44190	NM_173008	ENSMUSG00000035279	Ssc5d	A430110N23Rik|S5D-SRCRB	scavenger receptor cysteine rich family, 5 domains	protein-coding
chr4	116708149	116708775	+	832	NA	promoter-TSS (NM_025962)	promoter-TSS (NM_025962)	-77	NM_025962	67096	Mm.252785	NM_025962	ENSMUSG00000028690	Mmachc	1810037K07Rik|CblC	methylmalonic aciduria cblC type, with homocystinuria	protein-coding
chr15	76933543	76934344	+	554	NA	Intergenic	Intergenic	-8495	NM_001168276	239546	Mm.183650	NM_172817	ENSMUSG00000054967	Zfp647	6030449J21|Es492|Znf250	zinc finger protein 647	protein-coding
chr9	57439838	57440251	+	542	NA	promoter-TSS (NM_001357914)	promoter-TSS (NM_001357914)	70	NM_001357916	66812	Mm.250508	NM_176831	ENSMUSG00000063849	Ppcdc	1810057I13Rik|8430432M10Rik	phosphopantothenoylcysteine decarboxylase	protein-coding
chr6	4349989	4350336	+	637	NA	Intergenic	Intergenic	-155456	NM_007743	12843	Mm.277792	NM_007743	ENSMUSG00000029661	Col1a2	AA960264|AI325291|Col1a-2|Cola-2|Cola2|oim	collagen, type I, alpha 2	protein-coding
chr4	128805668	128806699	+	624	NA	promoter-TSS (NM_001081098)	promoter-TSS (NM_001081098)	-71	NM_001081098	230761	Mm.22616	NM_001081098	ENSMUSG00000028799	Zfp362	-	zinc finger protein 362	protein-coding
chr5	114091066	114091754	+	615	NA	promoter-TSS (NM_026805)	promoter-TSS (NM_026805)	-30	NM_001359214	68666	Mm.63584	NM_026805	ENSMUSG00000042078	Svop	1110030H18Rik|AI415691|msvop	SV2 related protein	protein-coding
chr2	13793063	13793900	+	603	NA	promoter-TSS (NM_145838)	promoter-TSS (NM_145838)	39	NM_145838	241230	Mm.330004	NM_145838	ENSMUSG00000003418	St8sia6	1700007J08Rik|AI314453|AI875066|ST8SiaVI|Siat8f	ST8 alpha-N-acetyl-neuraminide alpha-2,8-sialyltransferase 6	protein-coding
chr13	54621584	54621892	+	707	NA	promoter-TSS (NM_178397)	promoter-TSS (NM_178397)	-46	NM_178397	76577	Mm.194459	NM_178397	ENSMUSG00000025873	Faf2	2210404D11Rik|AI462440|Ubxd8|mKIAA0887	Fas associated factor family member 2	protein-coding
chr11	58168276	58168680	+	661	NA	promoter-TSS (NM_001166671)	promoter-TSS (NM_001166671)	61	NM_001166669	216766	Mm.275349	NM_172558	ENSMUSG00000037275	Gemin5	AA407055|AA407208|AI451603|BB194447|C330013N08	gem nuclear organelle associated protein 5	protein-coding
chr2	155624837	155625151	+	881	NA	intron (NM_001085378, intron 21 of 41)	intron (NM_001085378, intron 21 of 41)	2114	NR_030757	735275		NR_030757	ENSMUSG00000076312	Mir499	Mirn499|mir-499|mmu-mir-499	microRNA 499	ncRNA
chr5	115279564	115279920	+	890	NA	promoter-TSS (NM_026504)	promoter-TSS (NM_026504)	40	NM_026504	52064	Mm.290142	NM_026504	ENSMUSG00000041733	Coq5	1810014G04Rik|D5Ertd33e	coenzyme Q5 methyltransferase	protein-coding
chr11	98809552	98810426	+	1000	NA	promoter-TSS (NR_033551)	promoter-TSS (NR_033551)	100	NR_033551	100037262	Mm.442062	NR_033551	ENSMUSG00000075576	Gm12359	-	predicted gene 12359	ncRNA
chr9	50745906	50746688	+	690	NA	intron (NM_025865, intron 1 of 3)	intron (NM_025865, intron 1 of 3)	230	NM_025865	66952	Mm.273375	NM_025865	ENSMUSG00000032062	2310030G06Rik	2610024D04Rik|AV017521	RIKEN cDNA 2310030G06 gene	protein-coding
chr1	88211811	88212210	+	725	NA	promoter-TSS (NM_201645)	promoter-TSS (NM_201645)	51	NM_201645	394436	Mm.300095	NM_201645	ENSMUSG00000089960	Ugt1a1	Gnt1|UDPGT 1-1|UGT1A01|Udpgt-1a|UgtBr1	UDP glucuronosyltransferase 1 family, polypeptide A1	protein-coding
chr11	99230197	99230871	+	595	NA	5' UTR (NM_020618, exon 1 of 11)	5' UTR (NM_020618, exon 1 of 11)	483	NM_020618	57376	Mm.379086	NM_020618	ENSMUSG00000037935	Smarce1	2810417B20Rik|5830412H02Rik|9030408N19Rik|Baf27	SWI/SNF related, matrix associated, actin dependent regulator of chromatin, subfamily e, member 1	protein-coding
chr4	152107435	152108532	+	1000	NA	exon (NM_001285999, exon 13 of 21)	exon (NM_001285999, exon 13 of 21)	-7951	NM_001291010	85030	Mm.101198	NM_033042	ENSMUSG00000024793	Tnfrsf25	APO-3|DDR3|DR3|LARD|TR3|TRAMP|Tnfrsf12|WSL-1|WSL-LR|Wsl	tumor necrosis factor receptor superfamily, member 25	protein-coding
chr6	115675671	115676931	+	1000	NA	promoter-TSS (NM_001356334)	promoter-TSS (NM_001356334)	333	NR_152134	352968	Mm.184163	NR_152134		D830050J10Rik	-	RIKEN cDNA D830050J10 gene	ncRNA
chr4	139637928	139638403	+	575	NA	intron (NM_175438, intron 7 of 14)	intron (NM_175438, intron 7 of 14)	-5877	NR_105987	102465617		NR_105987	ENSMUSG00000098569	Mir7020	Gm27759|mmu-mir-7020	microRNA 7020	ncRNA
chr5	34581919	34582329	+	772	NA	intron (NM_001024458, intron 1 of 14)	intron (NM_001024458, intron 1 of 14)	7973	NR_106111	102466999		NR_106111	ENSMUSG00000099082	Mir7036b	Gm27625|mmu-mir-7036b	microRNA 7036b	ncRNA
chr1	38897817	38898260	+	668	NA	5' UTR (NM_145142, exon 1 of 7)	5' UTR (NM_145142, exon 1 of 7)	122	NM_145142	98388	Mm.260054	NM_145142	ENSMUSG00000026080	Chst10	AI507003|AU041319|Hnk-1st|ST	carbohydrate sulfotransferase 10	protein-coding
chr14	48120799	48121140	+	599	NA	promoter-TSS (NM_033602)	promoter-TSS (NM_033602)	100	NM_033602	93834	Mm.296457	NM_033602	ENSMUSG00000021846	Peli2	AW047589|BB129927	pellino 2	protein-coding
chr3	90265060	90265885	+	652	NA	5' UTR (NM_001356483, exon 1 of 28)	5' UTR (NM_001356483, exon 1 of 28)	237	NM_001356483	229541	Mm.30571	NM_201407	ENSMUSG00000042404	Dennd4b	-	DENN/MADD domain containing 4B	protein-coding
chr4	152283020	152283655	+	887	NA	exon (NM_178406, exon 6 of 6)	exon (NM_178406, exon 6 of 6)	8325	NM_008237	15207	Mm.3516	NM_008237	ENSMUSG00000028946	Hes3	Hes-3|bHLHb43	hes family bHLH transcription factor 3	protein-coding
chr8	94036659	94037631	+	830	NA	promoter-TSS (NM_001093757)	promoter-TSS (NM_001093757)	-53	NM_177767	270086	Mm.251085	NM_177767	ENSMUSG00000033009	Ogfod1	4930415J21Rik|AA387199|AA939912|AW061076|mKIAA1612	2-oxoglutarate and iron-dependent oxygenase domain containing 1	protein-coding
chr3	27863365	27863684	+	561	NA	Intergenic	Intergenic	32844	NM_001164437	208613	Mm.59189	NM_001164437	ENSMUSG00000043164	Tmem212	E030011K20Rik|Gm564	transmembrane protein 212	protein-coding
chr11	70699860	70700800	+	1000	NA	promoter-TSS (NM_001252485)	promoter-TSS (NM_001252485)	-175	NM_001252484	103844	Mm.101581	NM_213729	ENSMUSG00000057054	Inca1	AI842396	inhibitor of CDK, cyclin A1 interacting protein 1	protein-coding
chr7	42642499	42642950	+	622	NA	promoter-TSS (NM_001242388)	promoter-TSS (NM_001242388)	-120	NM_001242388	208111	Mm.387841	NM_001034857	ENSMUSG00000074158	Zfp976	9830147E19Rik|C330019L16Rik	zinc finger protein 976	protein-coding
chr17	78835180	78835895	+	1000	NA	promoter-TSS (NM_001081179)	promoter-TSS (NM_001081179)	21	NM_181649	53951	Mm.220253	NM_181649	ENSMUSG00000050668	Gpatch11	2310002B06Rik|C80922|Ccdc75|L26697	G patch domain containing 11	protein-coding
chr12	72084848	72086174	+	1000	NA	promoter-TSS (NM_024205)	promoter-TSS (NM_024205)	-198	NM_026038	67217	Mm.286120	NM_026038	ENSMUSG00000019718	L3hypdh	2810055F11Rik	L-3-hydroxyproline dehydratase (trans-)	protein-coding
chr4	138356306	138356550	+	542	NA	intron (NM_028176, intron 1 of 3)	intron (NM_028176, intron 1 of 3)	11527	NM_028176	72269	Mm.46182	NM_028176	ENSMUSG00000028755	Cda	2210401N16Rik	cytidine deaminase	protein-coding
chr4	150964668	150965428	+	717	NA	Intergenic	B3|SINE|B2	-32049	NM_011910	24111	Mm.89984	NM_011910	ENSMUSG00000028963	Uts2	UII|Ucn2|prepro-UII	urotensin 2	protein-coding
chr11	103101352	103101823	+	728	NA	promoter-TSS (NM_025988)	promoter-TSS (NM_025988)	71	NM_152813	72469	Mm.264743	NM_152813	ENSMUSG00000020937	Plcd3	2610205J15Rik|mKIAA1964	phospholipase C, delta 3	protein-coding
chr11	69008131	69008594	+	842	NA	promoter-TSS (NM_001159519)	promoter-TSS (NM_001159519)	98	NM_001159519	237823	Mm.340288	NM_001159519	ENSMUSG00000020899	Pfas	4432409B16Rik|FGAMS|FGAR-AT|FGARAT|Gm18|PURL|Sofa	phosphoribosylformylglycinamidine synthase (FGAR amidotransferase)	protein-coding
chr10	80248943	80249671	+	548	NA	promoter-TSS (NM_029272)	promoter-TSS (NM_029272)	-142	NM_001364694	75406	Mm.28712	NM_029272	ENSMUSG00000020153	Ndufs7	1010001M04Rik|CI-20kD	NADH:ubiquinone oxidoreductase core subunit S7	protein-coding
chr19	8929394	8930140	+	563	NA	promoter-TSS (NM_144872)	promoter-TSS (NM_144872)	73	NM_144872	225898	Mm.31008	NM_144872	ENSMUSG00000071647	Eml3	BC022146	echinoderm microtubule associated protein like 3	protein-coding
chr6	142365966	142366786	+	676	NA	intron (NM_001355511, intron 11 of 14)	intron (NM_001355511, intron 11 of 14)	20566	NM_001355511	19691	Mm.27407	NM_023042	ENSMUSG00000030243	Recql	RecQ1	RecQ protein-like	protein-coding
chr4	40268291	40268731	+	682	NA	intron (NM_134097, intron 1 of 2)	CpG-9801	-1068	NM_001349093	100504309	Mm.392019	NM_001349093		Smim27	2010003O02Rik|Toporsos	small integral membrane protein 27	protein-coding
chr14	69336972	69337403	+	599	NA	promoter-TSS (NM_001359160)	promoter-TSS (NM_001359160)	36	NM_001360352	67464	Mm.489765	NM_026174	ENSMUSG00000095463	Entpd4	1200014F22Rik|4930513O14Rik|A430102M06Rik|AI414893|Lysal1|mKIAA0392	ectonucleoside triphosphate diphosphohydrolase 4	protein-coding
chr7	126474421	126475353	+	659	NA	5' UTR (NM_001289542, exon 1 of 9)	5' UTR (NM_001289542, exon 1 of 9)	243	NM_001289541	20399	Mm.8538	NM_011363	ENSMUSG00000030733	Sh2b1	AI425885|C530001K22Rik|Irip|Psm|SH2-B|SH2-Bb|Sh2bpsm1|mKIAA1299	SH2B adaptor protein 1	protein-coding
chr3	66405761	66406009	+	596	NA	Intergenic	Intergenic	-109048	NM_145820	72789	Mm.443526	NM_028357	ENSMUSG00000027831	Veph1	2810471M23Rik|Veph	ventricular zone expressed PH domain-containing 1	protein-coding
chr4	126677430	126677978	+	1000	NA	promoter-TSS (NM_011970)	promoter-TSS (NM_011970)	61	NM_011970	26445	Mm.22233	NM_011970	ENSMUSG00000028837	Psmb2	AU045357|AW108089|C7-I|D4Wsu33e|HC7-I	proteasome (prosome, macropain) subunit, beta type 2	protein-coding
chr10	21782943	21783925	+	612	NA	Intergenic	Intergenic	92589	NR_045843	432436	Mm.244553	NM_001004162	ENSMUSG00000056716	Gm5420	EG432436	predicted gene 5420	ncRNA
chr8	94492475	94492689	+	561	NA	intron (NM_001033207, intron 19 of 48)	intron (NM_001033207, intron 19 of 48)	-12464	NR_106040	102466800		NR_106040	ENSMUSG00000098511	Mir7072	Gm27665|mmu-mir-7072	microRNA 7072	ncRNA
chr5	118214441	118214747	+	977	NA	intron (NM_172998, intron 8 of 11)	intron (NM_172998, intron 8 of 11)	30267	NM_172998	269695	Mm.320042	NM_172998	ENSMUSG00000032850	Rnft2	AW049082|B830028P19Rik|Tmem118	ring finger protein, transmembrane 2	protein-coding
chr11	70189275	70189732	+	660	NA	Intergenic	Intergenic	22880	NM_001204252	17312	Mm.252405	NM_010796	ENSMUSG00000000318	Clec10a	CD301a|M-ASGP-BP-1|Mgl|Mgl1	C-type lectin domain family 10, member A	protein-coding
chr7	30559536	30559930	+	667	NA	promoter-TSS (NM_001290569)	promoter-TSS (NM_001290569)	-87	NM_029377	75660	Mm.379242	NM_029377	ENSMUSG00000036845	Lin37	1810054G18Rik	lin-37 homolog (C. elegans)	protein-coding
chr2	157367473	157367934	+	719	NA	intron (NM_026968, intron 1 of 2)	CpG	109	NM_026968	69161	Mm.228619	NM_026968	ENSMUSG00000063019	Manbal	1810024K12Rik|AI836500	mannosidase, beta A, lysosomal-like	protein-coding
chr8	75213039	75213431	+	549	NA	promoter-TSS (NM_029182)	promoter-TSS (NM_029182)	-709	NM_029182	75141	Mm.179267	NM_029182	ENSMUSG00000034472	Rasd2	4930526B11Rik|AU045414|Rhes|TEM-2|TEM2	RASD family, member 2	protein-coding
chr4	134914588	134915169	+	677	NA	promoter-TSS (NM_027935)	promoter-TSS (NM_027935)	38	NM_027935	71817	Mm.88349	NM_027935	ENSMUSG00000028822	Tmem50a	3200001F09Rik|CAM|Smp1	transmembrane protein 50A	protein-coding
chr7	139212864	139213655	+	1000	NA	promoter-TSS (NM_001162540)	promoter-TSS (NM_001162540)	-16	NM_001143755	76612	Mm.17757	NM_027164	ENSMUSG00000015980	Lrrc27	1700071K18Rik|2310044E02Rik	leucine rich repeat containing 27	protein-coding
chr1	133231643	133232115	+	848	NA	Intergenic	Intergenic	-14218	NM_182930	240753	Mm.253559	NM_182930	ENSMUSG00000041757	Plekha6	9530028L01Rik|AU042621|Pepp3	pleckstrin homology domain containing, family A member 6	protein-coding
chr13	34993914	34994384	+	606	NA	promoter-TSS (NR_073427)	promoter-TSS (NR_073427)	-5	NM_011868	23986	Mm.491141	NM_011868	ENSMUSG00000021417	Eci2	Acbd2|Drs1|Hca88|Peci	enoyl-Coenzyme A delta isomerase 2	protein-coding
chr11	94653669	94654097	+	571	NA	promoter-TSS (NM_053161)	promoter-TSS (NM_053161)	92	NM_053161	94064	Mm.34951	NM_053161	ENSMUSG00000024414	Mrpl27	A630055F16Rik|D11Moh47|D18Ertd643e	mitochondrial ribosomal protein L27	protein-coding
chr4	141301076	141301763	+	646	NA	exon (NM_010139, exon 1 of 17)	exon (NM_010139, exon 1 of 17)	198	NM_010139	13836	Mm.2581	NM_010139	ENSMUSG00000006445	Epha2	AW545284|Eck|Myk2|Sek-2|Sek2	Eph receptor A2	protein-coding
chr9	59353196	59353559	+	849	NA	intron (NR_153195, intron 1 of 15)	CpG	131	NM_001359558	102774	Mm.200714	NM_175325	ENSMUSG00000025235	Bbs4	AW537059|AW742241|D9Ertd464e	Bardet-Biedl syndrome 4 (human)	protein-coding
chr19	8735522	8736139	+	601	NA	promoter-TSS (NM_134139)	promoter-TSS (NM_134139)	-9	NM_134139	107071	Mm.29627	NM_134139	ENSMUSG00000042729	Wdr74	5730436H21Rik|AA407588	WD repeat domain 74	protein-coding
chr9	66126312	66126820	+	841	NA	promoter-TSS (NM_026635)	promoter-TSS (NM_026635)	-45	NM_001359210	68250	Mm.27107	NM_026635	ENSMUSG00000032381	Ciao2a	5730536A07Rik|Fam96a	cytosolic iron-sulfur assembly component 2A	protein-coding
chr13	51762776	51763551	+	594	NA	intron (NM_001281880, intron 2 of 16)	intron (NM_001281880, intron 2 of 16)	30584	NM_001281880	20354	Mm.33903	NM_013660	ENSMUSG00000021451	Sema4d	CD100|Semacl2|Semaj|Semcl2|coll-4	sema domain, immunoglobulin domain (Ig), transmembrane domain (TM) and short cytoplasmic domain, (semaphorin) 4D	protein-coding
chr3	146499346	146500269	+	1000	NA	promoter-TSS (NM_027617)	promoter-TSS (NM_027617)	-14	NM_001316756	70951	Mm.383235	NM_027617	ENSMUSG00000028188	Spata1	4921536I21Rik|AV266943|SP-2	spermatogenesis associated 1	protein-coding
chr6	52211216	52211891	+	579	NA	intron (NR_015611, intron 1 of 2)	intron (NR_015611, intron 1 of 2)	1514	NM_010452	15400	Mm.71533	NM_010452	ENSMUSG00000079560	Hoxa3	Hox-1.5|Mo-10	homeobox A3	protein-coding
chr14	55092315	55092608	+	764	NA	promoter-TSS (NM_001039198)	promoter-TSS (NM_001039198)	-413	NM_001039198	239102	Mm.441113	NM_001039198	ENSMUSG00000040721	Zfhx2	ZFH-5	zinc finger homeobox 2	protein-coding
chr13	55714510	55714915	+	864	NA	promoter-TSS (NM_175150)	promoter-TSS (NM_175150)	62	NM_175150	69672	Mm.294457	NM_175150	ENSMUSG00000021497	Txndc15	2310047H23Rik|AI854086|C5orf14|UNQ335	thioredoxin domain containing 15	protein-coding
chr4	43875056	43876356	+	634	NA	intron (NM_016678, intron 1 of 20)	CpG	176	NM_016678	53614	Mm.331573	NM_016678	ENSMUSG00000028476	Reck	St15|mRECK	reversion-inducing-cysteine-rich protein with kazal motifs	protein-coding
chr11	34704889	34705427	+	797	NA	intron (NM_033374, intron 13 of 51)	intron (NM_033374, intron 13 of 51)	78747	NM_033374	94176	Mm.380679	NM_033374	ENSMUSG00000020143	Dock2	AI662014|AW122239|CED-5|Hch|MBC	dedicator of cyto-kinesis 2	protein-coding
chr4	114924846	114925564	+	562	NA	exon (NM_015758, exon 1 of 1)	exon (NM_015758, exon 1 of 1)	862	NM_015758	30923	Mm.377122	NM_015758	ENSMUSG00000044518	Foxe3	FREAC8|dyl|rct	forkhead box E3	protein-coding
chr12	93928536	93929244	+	604	NA	Intergenic	Intergenic	1552	NR_106175	102465890		NR_106175	ENSMUSG00000098498	Mir8099-1	Gm27917|mmu-mir-8099-1	microRNA 8099-1	ncRNA
chr2	121955800	121956172	+	1000	NA	promoter-TSS (NM_001290992)	promoter-TSS (NM_001290992)	-15	NM_001290991	329506	Mm.249405	NM_212450	ENSMUSG00000033411	Ctdspl2	D2Ertd485e|SCP4	CTD (carboxy-terminal domain, RNA polymerase II, polypeptide A) small phosphatase like 2	protein-coding
chr3	54755164	54755972	+	706	NA	promoter-TSS (NM_019483)	promoter-TSS (NM_019483)	-14	NM_019483	55994	Mm.244353	NM_019483	ENSMUSG00000027796	Smad9	MADH6|Madh8|Madh9|Smad8	SMAD family member 9	protein-coding
chr7	46396216	46396957	+	566	NA	5' UTR (NM_008421, exon 1 of 2)	5' UTR (NM_008421, exon 1 of 2)	118	NM_001112739	16502	Mm.249386	NM_008421	ENSMUSG00000058975	Kcnc1	C230009H10Rik|KShIIIB|KV4|Kcr2-1|Kv3.1|NGK2|Shaw	potassium voltage gated channel, Shaw-related subfamily, member 1	protein-coding
chr10	75589252	75589577	+	582	NA	promoter-TSS (NM_011820)	promoter-TSS (NM_011820)	33	NM_001359425	23887	Mm.257927	NM_011820	ENSMUSG00000006344	Ggt5	AI551243|GGL|GGT-REL|Ggtla1	gamma-glutamyltransferase 5	protein-coding
chr2	174295073	174295222	+	596	NA	non-coding (NR_002846, exon 1 of 5)	non-coding (NR_002846, exon 1 of 5)	289	NR_002846	56802	Mm.125770	NR_002846	ENSMUSG00000086537	Gnasas1	Gnas-as|Nespas|Nespos	GNAS antisense RNA 1	ncRNA
chr9	104062690	104064036	+	720	NA	promoter-TSS (NM_175324)	promoter-TSS (NM_175324)	-242	NM_025692	66663	Mm.224935	NM_025692	ENSMUSG00000032557	Uba5	5730525G14Rik|AW240750|Ube1dc1	ubiquitin-like modifier activating enzyme 5	protein-coding
chr5	15688848	15689253	+	1000	NA	intron (NR_001585, intron 1 of 4)	RLTR10C|LTR|ERVK	8340	NR_001585	75858	Mm.359463	NR_001585	ENSMUSG00000089871	Speer4cos	4930568L21Rik|SPEER-7|Speer7-ps|Speer7-ps1	spermatogenesis associated glutamate (E)-rich protein 4C, opposite strand transcript	pseudo
chr13	78163062	78163351	+	618	NA	intron (NM_001163419, intron 9 of 9)	intron (NM_001163419, intron 9 of 9)	33243	NM_001347539	13865	Mm.439653	NM_010151	ENSMUSG00000069171	Nr2f1	COUP-TF1|COUP-TFI|COUPTFA|EAR-3|EAR3|Erbal3|SVP44|Tcfcoup1	nuclear receptor subfamily 2, group F, member 1	protein-coding
chr5	107491795	107492762	+	619	NA	TTS (NM_001255991)	TTS (NM_001255991)	-5467	NM_001007574	231570	Mm.261891	NM_001007574	ENSMUSG00000111375	A830010M20Rik	AI849226|Kiaa1107|mKIAA1107	RIKEN cDNA A830010M20 gene	protein-coding
chr15	100870406	100871454	+	567	NA	intron (NM_001077499, intron 1 of 26)	CpG	285	NM_001077499	20273	Mm.385012	NM_011323	ENSMUSG00000023033	Scn8a	AI853486|C630029C19Rik|NaCh6|Nav1.6|dmu|med|mnd-2|mnd2|nmf2|nmf335|nmf58|nur14|seal	sodium channel, voltage-gated, type VIII, alpha	protein-coding
chr5	145114122	145114346	+	659	NA	promoter-TSS (NM_023142)	promoter-TSS (NM_023142)	-22	NM_023142	11867	Mm.30010	NM_023142	ENSMUSG00000029622	Arpc1b	41kDa|AA408064|AA408534|AA571392|AF007010|AW208418|L72|SOP2Hs|p41-ARC	actin related protein 2/3 complex, subunit 1B	protein-coding
chr10	88146562	88147188	+	1000	NA	promoter-TSS (NM_028334)	promoter-TSS (NM_028334)	66	NM_029249	75317	Mm.179378	NM_029249	ENSMUSG00000035365	Parpbp	4930547N16Rik|AI503644|PARI	PARP1 binding protein	protein-coding
chr5	121627959	121628173	+	555	NA	intron (NM_028037, intron 16 of 20)	intron (NM_028037, intron 16 of 20)	-9128	NM_178799	338350	Mm.482918	NM_178799	ENSMUSG00000042647	Acad12	9330129D05Rik	acyl-Coenzyme A dehydrogenase family, member 12	protein-coding
chr4	136602148	136602943	+	900	NA	exon (NM_001347221, exon 1 of 20)	exon (NM_001347221, exon 1 of 20)	178	NM_133872	99982	Mm.28540	NM_133872	ENSMUSG00000036940	Kdm1a	1810043O07Rik|AA408884|Aof2|D4Ertd478e|Kdm1|Lsd1|mKIAA0601	lysine (K)-specific demethylase 1A	protein-coding
chr17	29614667	29615383	+	932	NA	non-coding (NR_132314, exon 1 of 28)	non-coding (NR_132314, exon 1 of 28)	236	NR_132314	106014251	Mm.305994	NR_132314		Gm28043	Rnf8-cmtr1	predicted gene, 28043	ncRNA
chr12	105583520	105583805	+	695	NA	intron (NM_009747, intron 1 of 2)	intron (NM_009747, intron 1 of 2)	-20429	NM_007539	12061	Mm.377078	NM_007539	ENSMUSG00000041347	Bdkrb1	B1BKR|B1R|BKR1|BRADYB1|Bdkrb	bradykinin receptor, beta 1	protein-coding
chr5	119670141	119671079	+	643	NA	promoter-TSS (NM_198052)	promoter-TSS (NM_198052)	-252	NM_198052	21386	Mm.219139	NM_011535	ENSMUSG00000018604	Tbx3	D5Ertd189e	T-box 3	protein-coding
chr9	47062500	47062883	+	811	NA	Intergenic	Intergenic	63950	NM_001243258	215467	Mm.246572	NM_001243258	ENSMUSG00000094893	Gm4791	D930036J05	predicted gene 4791	protein-coding
chr13	14063247	14063885	+	849	NA	promoter-TSS (NM_010282)	promoter-TSS (NM_010282)	-78	NM_001331176	14593	Mm.148039	NM_010282	ENSMUSG00000021302	Ggps1	1810026C22Rik|9530089B04Rik|AI843169|C79210	geranylgeranyl diphosphate synthase 1	protein-coding
chr8	86745273	86746293	+	821	NA	promoter-TSS (NR_027829)	promoter-TSS (NR_027829)	84	NR_027829	666945	Mm.391806	NR_027829		Gm10638	-	predicted gene 10638	ncRNA
chr15	58383507	58383757	+	762	NA	intron (NM_027211, intron 1 of 8)	intron (NM_027211, intron 1 of 8)	5642	NM_027211	69787	Mm.237985	NM_027211		Anxa13	1810034H17Rik|AV055219	annexin A13	protein-coding
chr9	35267443	35267985	+	1000	NA	promoter-TSS (NM_028040)	promoter-TSS (NM_028040)	91	NM_194257	109229	Mm.24197	NM_175411	ENSMUSG00000050471	Fam118b	2310022O21Rik|2700018L24Rik|C030004A17Rik|Ppp4r1l	family with sequence similarity 118, member B	protein-coding
chr5	134246242	134246548	+	806	NA	intron (NM_001080747, intron 23 of 33)	intron (NM_001080747, intron 23 of 33)	-16770	NM_001286037	17969	Mm.425296	NM_010876	ENSMUSG00000015950	Ncf1	NCF-47K|NOXO2|Ncf-1|p47-phox|p47<phox>|p47phox	neutrophil cytosolic factor 1	protein-coding
chr8	13204455	13204723	+	635	NA	Intergenic	Lx8|LINE|L1	-3965	NM_001368858	66790	Mm.34901	NM_025768	ENSMUSG00000038515	Grtp1	5430401C05Rik|C81211|Tbc1d6	GH regulated TBC protein 1	protein-coding
chr4	155803266	155803880	+	598	NA	5' UTR (NM_025570, exon 2 of 5)	5' UTR (NM_025570, exon 2 of 5)	695	NM_025570	66448	Mm.23825	NM_025570	ENSMUSG00000029066	Mrpl20	2610008D01Rik|4930425I20Rik	mitochondrial ribosomal protein L20	protein-coding
chr1	120549777	120550474	+	690	NA	Intergenic	Intergenic	-45101	NM_010766	17167	Mm.1856	NM_010766	ENSMUSG00000026390	Marco	AI323439|Ly112|Scara2	macrophage receptor with collagenous structure	protein-coding
chr7	140821667	140822254	+	669	NA	intron (NM_001001180, intron 1 of 2)	intron (NM_001001180, intron 1 of 2)	218	NM_001001180	407812	Mm.359154	NM_001001180	ENSMUSG00000060314	Zfp941	-	zinc finger protein 941	protein-coding
chr1	14484520	14484931	+	850	NA	Intergenic	Intergenic	-174526	NM_010164	14048	Mm.250185	NM_010164	ENSMUSG00000025932	Eya1	bor	EYA transcriptional coactivator and phosphatase 1	protein-coding
chr4	137964315	137964550	+	609	NA	3' UTR (NM_001369178, exon 17 of 17)	3' UTR (NM_001369178, exon 17 of 17)	-29023	NR_161160	230861	Mm.268903	NM_172703	ENSMUSG00000028760	Eif4g3	1500002J22Rik|4930523M17Rik|G1-419-52|Gm32394|eIF4GII|repro8	eukaryotic translation initiation factor 4 gamma, 3	protein-coding
chr2	26910103	26910924	+	1000	NA	promoter-TSS (NM_013721)	promoter-TSS (NM_013721)	129	NM_001033908	20933	Mm.397932	NM_011513	ENSMUSG00000015776	Med22	AW212655|AW558812|Surf-5|Surf5	mediator complex subunit 22	protein-coding
chr1	171531007	171531775	+	602	NA	intron (NM_010584, intron 4 of 7)	intron (NM_010584, intron 4 of 7)	3903	NM_010584	16429	Mm.247426	NM_010584	ENSMUSG00000038209	Itln1	IntL|Itln|Itln2|Itln3|Itln5|Itlna|Lfr	intelectin 1 (galactofuranose binding)	protein-coding
chr10	107307130	107307889	+	542	NA	intron (NM_001284329, intron 1 of 5)	Lx4A|LINE|L1	35115	NM_001284329	108030	Mm.268025	NM_001033223	ENSMUSG00000019906	Lin7a	AI848705|LIN-7A|MALS-1|TIP-33|Veli|Veli1	lin-7 homolog A (C. elegans)	protein-coding
chr5	120844754	120845020	+	714	NA	Intergenic	Intergenic	-2480	NM_145153	243262	Mm.105369	NM_145153	ENSMUSG00000053765	Oas1f	-	2'-5' oligoadenylate synthetase 1F	protein-coding
chr8	22214747	22215342	+	1000	NA	intron (NM_027338, intron 10 of 13)	intron (NM_027338, intron 10 of 13)	-12259	NM_001205253	56229	Mm.32067	NM_019576	ENSMUSG00000031480	Thsd1	4833423O18Rik|Tmtsp	thrombospondin, type I, domain 1	protein-coding
chr9	20976213	20977026	+	699	NA	5' UTR (NM_010333, exon 1 of 2)	5' UTR (NM_010333, exon 1 of 2)	174	NM_010333	14739	Mm.46493	NM_010333	ENSMUSG00000043895	S1pr2	1100001A16Rik|Edg5|Gpcr13|H218|LPb2|S1P2	sphingosine-1-phosphate receptor 2	protein-coding
chr8	85059983	85060556	+	576	NA	non-coding (NR_110581, exon 1 of 3)	non-coding (NR_110581, exon 1 of 3)	150	NM_026791	68628	Mm.374815	NM_026791	ENSMUSG00000008167	Fbxw9	1110017H11Rik|Fbw9	F-box and WD-40 domain protein 9	protein-coding
chr10	81175063	81175290	+	699	NA	Intergenic	Intergenic	-1455	NM_007907	13629	Mm.2903	NM_007907	ENSMUSG00000034994	Eef2	Ef-2	eukaryotic translation elongation factor 2	protein-coding
chr17	49898738	49899147	+	621	NA	intron (NM_177052, intron 19 of 22)	intron (NM_177052, intron 19 of 22)	283770	NM_177052	319991	Mm.441340	NM_177052	ENSMUSG00000023999	Kif6	D130004B10Rik|D130084M03Rik	kinesin family member 6	protein-coding
chr10	117305388	117305795	+	553	NA	Intergenic	Intergenic	-12723	NM_013590	17110	Mm.177539	NM_013590	ENSMUSG00000069515	Lyz1	Lyz|Lyzf3|Lzp-s	lysozyme 1	protein-coding
chr16	95264405	95264743	+	693	NA	intron (NM_019664, intron 3 of 4)	intron (NM_019664, intron 3 of 4)	-4872	NR_153766	102633941	Mm.384086	NR_153766		Gm31641	-	predicted gene, 31641	ncRNA
chr15	76415369	76415705	+	620	NA	intron (NM_001162489, intron 11 of 30)	IMPB_01|Satellite|Satellite	-17677	NR_105919	102465576		NR_105919	ENSMUSG00000099260	Mir6954	Gm27770|mmu-mir-6954	microRNA 6954	ncRNA
chr9	44767502	44767883	+	777	NA	5' UTR (NM_145985, exon 1 of 10)	5' UTR (NM_145985, exon 1 of 10)	116	NM_145985	213827	Mm.371682	NM_145985	ENSMUSG00000032096	Arcn1	4632432M07Rik|nur17	archain 1	protein-coding
chr7	44405503	44406072	+	618	NA	Intergenic	Intergenic	21661	NM_001114116	20981	Mm.4824	NM_016663	ENSMUSG00000030731	Syt3	AI385753|sytIII	synaptotagmin III	protein-coding
chr15	99717389	99717941	+	558	NA	promoter-TSS (NM_010271)	promoter-TSS (NM_010271)	78	NM_010271	14555	Mm.252391	NM_010271	ENSMUSG00000023019	Gpd1	AI747587|GPD-C|GPDH-C|Gdc-1|Gdc1	glycerol-3-phosphate dehydrogenase 1 (soluble)	protein-coding
chr4	156235796	156236322	+	991	NA	promoter-TSS (NM_021303)	promoter-TSS (NM_021303)	44	NR_161236	57741	Mm.423051	NM_021303	ENSMUSG00000095567	Noc2l	AA410003|AF155546|NIR	NOC2 like nucleolar associated transcriptional repressor	protein-coding
chr11	101138442	101139099	+	543	NA	Intergenic	Intergenic	-17114	NM_134028	103768	Mm.142348	NM_134028	ENSMUSG00000045007	Tubg2	AI504772|Tubgl	tubulin, gamma 2	protein-coding
chr15	77068700	77069322	+	589	NA	Intergenic	Intergenic	-15387	NR_108037	74303	Mm.444304	NR_108037	ENSMUSG00000097267	1700109K24Rik	4933425G21Rik	RIKEN cDNA 1700109K24 gene	ncRNA
chr9	44905002	44905318	+	766	NA	Intergenic	Intergenic	15582	NM_013795	27425	Mm.14663	NM_013795	ENSMUSG00000038717	Atp5l	4933437C06Rik|Atp5mg	ATP synthase, H+ transporting, mitochondrial F0 complex, subunit G	protein-coding
chr17	8970189	8970511	+	583	NA	intron (NM_001290707, intron 19 of 22)	intron (NM_001290707, intron 19 of 22)	-17983	NM_025851	66931	Mm.67591	NM_025851	ENSMUSG00000023873	1700010I14Rik	-	RIKEN cDNA 1700010I14 gene	protein-coding
chr9	21251107	21251805	+	816	NA	Intergenic	Intergenic	-3013	NM_053190	94226	Mm.190619	NM_053190	ENSMUSG00000045087	S1pr5	Edg8|S1P5|lpB4	sphingosine-1-phosphate receptor 5	protein-coding
chr5	114100120	114100979	+	651	NA	intron (NM_001033202, intron 1 of 12)	CpG	216	NM_001033202	100756	Mm.240421	NM_001033202	ENSMUSG00000029592	Usp30	6330590F17Rik|AI851327|D5Ertd483e	ubiquitin specific peptidase 30	protein-coding
chr16	55973429	55974744	+	950	NA	exon (NM_173026, exon 1 of 11)	exon (NM_173026, exon 1 of 11)	282	NM_173026	271377	Mm.282814	NM_173026	ENSMUSG00000022601	Zbtb11	9230110G02Rik|ZNF-U69274	zinc finger and BTB domain containing 11	protein-coding
chr11	30954257	30954586	+	632	NA	promoter-TSS (NM_023906)	promoter-TSS (NM_023906)	23	NM_023906	65257	Mm.440539	NM_023906	ENSMUSG00000020305	Asb3	2400011J03Rik|Asb-3	ankyrin repeat and SOCS box-containing 3	protein-coding
chr10	118554970	118555215	+	581	NA	intron (NR_104123, intron 1 of 4)	intron (NR_104123, intron 1 of 4)	1433	NR_104123	103214	Mm.30529	NR_104123	ENSMUSG00000112230	Ifngas1	AI447422|Tmevpg1	Ifng antisense RNA 1	ncRNA
chr8	84125645	84126123	+	609	NA	promoter-TSS (NM_001013384)	promoter-TSS (NM_001013384)	-105	NM_001013384	244550	Mm.334654	NM_001013384	ENSMUSG00000012889	Podnl1	5832418A03Rik|Gm506	podocan-like 1	protein-coding
chr17	15041186	15041825	+	1000	NA	promoter-TSS (NM_001123367)	promoter-TSS (NM_001123367)	-46	NM_001360400	381062	Mm.393767	NM_183133	ENSMUSG00000036552	Ermard	2210404J11Rik|2410011O22Rik|AI448938	ER membrane associated RNA degradation	protein-coding
chr6	113531244	113531777	+	803	NA	promoter-TSS (NM_001347350)	promoter-TSS (NM_001347350)	128	NM_175101	66087	Mm.275989	NM_175101	ENSMUSG00000030286	Emc3	0610039A15Rik|AI225901|AW260416|Pob|Tmem111	ER membrane protein complex subunit 3	protein-coding
chr16	17911041	17911516	+	682	NA	promoter-TSS (NM_022408)	promoter-TSS (NM_022408)	70	NM_001081633	27886	Mm.256480	NM_022408	ENSMUSG00000003527	Ess2	AI462402|D16H22S1269E|Dgcr1|Dgcr14|Dgsi|ES2|Es2el	ess-2 splicing factor	protein-coding
chr2	180103933	180104758	+	911	NA	promoter-TSS (NR_102309)	promoter-TSS (NR_102309)	62	NM_133849	99296	Mm.285360	NM_133849	ENSMUSG00000039059	Hrh3	AW049250|Eae8|H3R|HH3R	histamine receptor H3	protein-coding
chr15	76724675	76724982	+	572	NA	promoter-TSS (NM_145472)	promoter-TSS (NM_145472)	-983	NM_145472	223665	Mm.291713	NM_145472	ENSMUSG00000116138	C030006K11Rik	1110033I13Rik	RIKEN cDNA C030006K11 gene	protein-coding
chr2	105904346	105904970	+	939	NA	promoter-TSS (NM_028260)	promoter-TSS (NM_028260)	20	NM_028260	66541	Mm.272253	NM_028260	ENSMUSG00000042670	Immp1l	1500034J20Rik|2610528O17Rik|AU042386	IMP1 inner mitochondrial membrane peptidase-like (S. cerevisiae)	protein-coding
chr14	57797972	57798581	+	707	NA	promoter-TSS (NM_009119)	promoter-TSS (NM_009119)	58	NM_001142441	100041953	Mm.290178	NM_001142441	ENSMUSG00000061104	Sap18b	Gm10094	Sin3-associated polypeptide 18B	protein-coding
chr9	101445914	101446195	+	665	NA	Intergenic	Intergenic	103860	NR_110509	102633035	Mm.411422	NR_110509	ENSMUSG00000101941	Gm28979	-	predicted gene 28979	ncRNA
chr7	45643480	45643990	+	993	NA	intron (NM_172418, intron 7 of 9)	intron (NM_172418, intron 7 of 9)	3758	NM_172418	74490	Mm.107442	NM_172418	ENSMUSG00000042918	Mamstr	2810022D01Rik|5430432N15Rik|AW743872|Mastr	MEF2 activating motif and SAP domain containing transcriptional regulator	protein-coding
chrX	53167046	53167546	+	649	NA	intron (NM_001357802, intron 1 of 2)	intron (NM_001357802, intron 1 of 2)	-52891	NM_019538	56096	Mm.274842	NM_019538	ENSMUSG00000061082	Plac1	DXWsu72e|Epcs26|Oosp2l	placental specific protein 1	protein-coding
chr11	78465553	78466220	+	735	NA	exon (NM_026740, exon 1 of 5)	exon (NM_026740, exon 1 of 5)	185	NM_026740	52466	Mm.131618	NM_026740	ENSMUSG00000020829	Slc46a1	1110002C08Rik|D11Ertd18e|HCP1|Pcft	solute carrier family 46, member 1	protein-coding
chr19	45544961	45545268	+	831	NA	Intergenic	CpG	15450	NM_001330506	56626	Mm.46509	NM_020032	ENSMUSG00000025218	Poll	1110003P06Rik|AV007317	polymerase (DNA directed), lambda	protein-coding
chr19	23643722	23644418	+	578	NA	intron (NM_026188, intron 1 of 5)	RMER1A|Other|Other	8742	NM_026188	67483	Mm.443287	NM_026188	ENSMUSG00000033053	1700028P14Rik	AV209940	RIKEN cDNA 1700028P14 gene	protein-coding
chr15	8821168	8821541	+	1000	NA	Intergenic	ERVB7_1-LTR_MM|LTR|ERVK	-110547	NM_148938	20512	Mm.204834	NM_148938	ENSMUSG00000005360	Slc1a3	AI504299|B430115D02Rik|Eaat1|GLAST|GLAST-1|GLU-T|GluT-1|Gmt1|MGluT1	solute carrier family 1 (glial high affinity glutamate transporter), member 3	protein-coding
chr10	94688166	94689141	+	1000	NA	promoter-TSS (NR_015524)	promoter-TSS (NR_015524)	-40	NR_015524	67723	Mm.116284	NR_015524		Cep83os	4932415G12Rik|Ccdc41os1	centrosomal protein 83, opposite strand	ncRNA
chr2	173698856	173699158	+	747	NA	intron (NM_024436, intron 6 of 6)	intron (NM_024436, intron 6 of 6)	2141	NR_105758	102465173		NR_105758	ENSMUSG00000098588	Mir6340	Gm27909|mmu-mir-6340	microRNA 6340	ncRNA
chr15	76461265	76462032	+	606	NA	intron (NM_013481, intron 3 of 15)	intron (NM_013481, intron 3 of 15)	4210	NM_198885	20289	Mm.322821	NM_198885	ENSMUSG00000034161	Scx	BB114693|Bhlha41|Scl	scleraxis	protein-coding
chr10	128645663	128645913	+	634	NA	promoter-TSS (NR_152728)	promoter-TSS (NR_152728)	-96	NR_152728	102633634	Mm.406455	NR_152728		Gm26876	-	predicted gene, 26876	ncRNA
chr4	126556779	126557470	+	673	NA	exon (NM_175554, exon 1 of 26)	exon (NM_175554, exon 1 of 26)	144	NM_175554	269582	Mm.243962	NM_175554	ENSMUSG00000042489	Clspn	B130025E01|C85083|E130314M08Rik	claspin	protein-coding
chr2	11777178	11777881	+	1000	NA	promoter-TSS (NM_001348234)	promoter-TSS (NM_001348234)	56	NM_001348234	50755	Mm.24088	NM_015792	ENSMUSG00000058594	Fbh1	AU015756|Fbx18|Fbxo18	F-box DNA helicase 1	protein-coding
chr10	39959786	39960780	+	563	NA	promoter-TSS (NR_160808)	promoter-TSS (NR_160808)	-130	NR_160808	100041085	Mm.332530	NM_001173500	ENSMUSG00000071335	Mfsd4b3-ps	G630090E17Rik|Mfsd4b3|Naglt1c	major facilitator superfamily domain containing 4B3, pseudogene	pseudo
chr15	99074577	99075095	+	916	NA	promoter-TSS (NM_001162506)	promoter-TSS (NM_001162506)	-137	NM_030159	78733	Mm.124905	NM_030159	ENSMUSG00000032783	Troap	AW476063|E130301L11Rik|tastin	trophinin associated protein	protein-coding
chr4	138856591	138856831	+	615	NA	intron (NM_001122954, intron 1 of 5)	ORR1D2|LTR|ERVL-MaLR	6758	NM_001122954	18784	Mm.486532	NM_011110	ENSMUSG00000041193	Pla2g5	PLA2|sPLA2	phospholipase A2, group V	protein-coding
chr6	90435231	90435450	+	571	NA	Intergenic	Intergenic	-6860	NM_173775	243538	Mm.386876	NM_173775	ENSMUSG00000048794	Cfap100	AW048498|C030041G11Rik|C230069K22Rik|Ccdc37	cilia and flagella associated protein 100	protein-coding
chr13	93771608	93772388	+	607	NA	exon (NM_009712, exon 1 of 8)	exon (NM_009712, exon 1 of 8)	319	NM_009712	11881	Mm.300178	NM_009712	ENSMUSG00000042082	Arsb	1110007C02Rik|AI480648|As-1|As-1r|As-1s|As-1t|As1|As1-r|As1-s|As1-t|Asr-1|Ast-1	arylsulfatase B	protein-coding
chr4	155847210	155848140	+	678	NA	5' UTR (NM_010091, exon 1 of 15)	5' UTR (NM_010091, exon 1 of 15)	273	NM_001356381	13542	Mm.3400	NM_010091	ENSMUSG00000029071	Dvl1	Dvl|mKIAA4029	dishevelled segment polarity protein 1	protein-coding
chr7	81868145	81868420	+	750	NA	intron (NM_001291282, intron 3 of 9)	intron (NM_001291282, intron 3 of 9)	5595	NM_001291282	107769	Mm.221412	NM_145375	ENSMUSG00000038623	Tm6sf1	AI428514|BC023123|C630016D09Rik	transmembrane 6 superfamily member 1	protein-coding
chr7	139119393	139119703	+	736	NA	intron (NM_021302, intron 8 of 11)	intron (NM_021302, intron 8 of 11)	33547	NM_011993	26757	Mm.250414	NM_011993	ENSMUSG00000025478	Dpysl4	AI173505|CRMP-3|Crmp3|DPY4|Drp-4|Ulip4	dihydropyrimidinase-like 4	protein-coding
chr1	33669687	33670717	+	857	NA	promoter-TSS (NM_008922)	promoter-TSS (NM_008922)	378	NR_033199	67503	Mm.87069	NM_026204	ENSMUSG00000103746	1700001G17Rik	-	RIKEN cDNA 1700001G17 gene	ncRNA
chr10	79916839	79917312	+	794	NA	promoter-TSS (NM_177994)	promoter-TSS (NM_177994)	104	NM_053244	114229	Mm.191035	NM_053244	ENSMUSG00000035773	Kiss1r	Gpr54|KiSS-1|kiSS-1R	KISS1 receptor	protein-coding
chr5	135001305	135001686	+	751	NA	promoter-TSS (NR_026907)	promoter-TSS (NR_026907)	-145	NR_026907	71304	Mm.482317	NR_026907	ENSMUSG00000054909	Wbscr25	4933433J03Rik|4933439O14Rik	Williams Beuren syndrome chromosome region 25 (human)	ncRNA
chr13	31863589	31863998	+	548	NA	intron (NM_146041, intron 9 of 10)	intron (NM_146041, intron 9 of 10)	57147	NM_008592	17300	Mm.12949	NM_008592	ENSMUSG00000050295	Foxc1	FREAC3|Fkh1|Mf1|Mf4|ch|fkh-1|frkhda	forkhead box C1	protein-coding
chr10	127040967	127042261	+	1000	NA	promoter-TSS (NM_010792)	promoter-TSS (NM_010792)	-220	NM_001205036	100504608	Mm.486142	NM_001205036	ENSMUSG00000080115	Eef1akmt3	EG546486|Fam119b|Gm16109|Mettl21b	EEF1A lysine methyltransferase 3	protein-coding
chr7	19457900	19459257	+	653	NA	5' UTR (NM_172279, exon 1 of 17)	5' UTR (NM_172279, exon 1 of 17)	265	NM_001368427	232944	Mm.260504	NM_172279	ENSMUSG00000030397	Mark4	2410090P21Rik|Markl1	MAP/microtubule affinity regulating kinase 4	protein-coding
chr16	97533180	97533520	+	553	NA	Intergenic	RMER19B|LTR|ERVK	-2731	NR_003508	17858	Mm.14157	NM_013606	ENSMUSG00000023341	Mx2	AI528743|Mx-2	MX dynamin-like GTPase 2	protein-coding
chr4	44704200	44704713	+	609	NA	non-coding (NR_073462, exon 1 of 1)	non-coding (NR_073462, exon 1 of 1)	1656	NR_073462	70602	Mm.491142	NR_073462	ENSMUSG00000103995	5730488B01Rik	-	RIKEN cDNA 5730488B01 gene	ncRNA
chr10	61714911	61715481	+	680	NA	promoter-TSS (NM_001284300)	promoter-TSS (NM_001284300)	-67	NM_001039194	71361	Mm.286309	NM_153779	ENSMUSG00000020085	Aifm2	5430437E11Rik|Amid|D730001I10Rik|PRG3	apoptosis-inducing factor, mitochondrion-associated 2	protein-coding
chr9	57910605	57911152	+	852	NA	promoter-TSS (NM_001122873)	promoter-TSS (NM_001122873)	-108	NM_001122873	69459	Mm.41735	NM_027086	ENSMUSG00000055720	Ubl7	2300004C15Rik	ubiquitin-like 7 (bone marrow stromal cell-derived)	protein-coding
chr18	60648838	60649399	+	850	NA	Intergenic	Intergenic	-14292	NR_045401	328963	Mm.417203	NR_045401		G630071F17Rik	G630071F17	RIKEN cDNA G630071F17 gene	ncRNA
chr8	71670962	71671857	+	637	NA	intron (NM_001029873, intron 1 of 41)	CpG	348	NM_001029873	382018	Mm.334606	NM_001029873	ENSMUSG00000034799	Unc13a	2410078G03Rik|Munc13-1	unc-13 homolog A	protein-coding
chr14	102982446	102983104	+	729	NA	promoter-TSS (NR_039592)	promoter-TSS (NR_039592)	-138	NM_177715	239217	Mm.246466	NM_177715	ENSMUSG00000098557	Kctd12	AU046135|AW538430|Pfet1|Pfetin	potassium channel tetramerisation domain containing 12	protein-coding
chr14	69236050	69236586	+	618	NA	Intergenic	RMER1B|Other|Other	45626	NM_010921	18095	Mm.3520	NM_010921	ENSMUSG00000022061	Nkx3-1	Bax|NKX3.1|NKX3A|Nkx-3.1|bagpipe	NK3 homeobox 1	protein-coding
chr2	25402942	25403506	+	682	NA	5' UTR (NM_008721, exon 1 of 9)	5' UTR (NM_008721, exon 1 of 9)	174	NM_008721	18146	Mm.1131	NM_008721	ENSMUSG00000015094	Npdc1	AI314472|NPDC-1	neural proliferation, differentiation and control 1	protein-coding
chr4	129490879	129491876	+	601	NA	promoter-TSS (NM_080442)	promoter-TSS (NM_080442)	187	NM_001085491	68233	Mm.424983	NM_001085491	ENSMUSG00000078554	Fam229a	1700125D06Rik	family with sequence similarity 229, member A	protein-coding
chr17	46645458	46646449	+	715	NA	promoter-TSS (NM_025302)	promoter-TSS (NM_025302)	127	NM_029091	74764	Mm.279599	NM_029091	ENSMUSG00000003546	Klc4	1200014P03Rik|AA408085|AW146303|Knsl8	kinesin light chain 4	protein-coding
chr11	101467810	101468262	+	780	NA	promoter-TSS (NM_009708)	promoter-TSS (NM_009708)	-139	NM_009708	11858	Mm.378883	NM_009708	ENSMUSG00000001313	Rnd2	Arhn|Rohn|rho7	Rho family GTPase 2	protein-coding
chr10	118370477	118370805	+	1000	NA	Intergenic	Intergenic	-70405	NM_008337	15978	Mm.240327	NM_008337	ENSMUSG00000055170	Ifng	IFN-g|Ifg	interferon gamma	protein-coding
chr11	61193478	61193688	+	612	NA	Intergenic	Intergenic	-15159	NM_001112725	11670	Mm.4257	NM_007436	ENSMUSG00000019102	Aldh3a1	Ahd-4|Ahd4|Aldh|Aldh3	aldehyde dehydrogenase family 3, subfamily A1	protein-coding
chr17	23857178	23857521	+	753	NA	exon (NM_027220, exon 4 of 5)	exon (NM_027220, exon 4 of 5)	3577	NM_027220	69814	Mm.244143	NM_027220	ENSMUSG00000048992	Prss32	2010001P08Rik|mT5|tryptase-5	protease, serine 32	protein-coding
chr1	75180189	75180529	+	623	NA	promoter-TSS (NM_023732)	promoter-TSS (NM_023732)	33	NM_023732	74104	Mm.28663	NM_023732	ENSMUSG00000026198	Abcb6	1200005B17Rik	ATP-binding cassette, sub-family B (MDR/TAP), member 6	protein-coding
chr2	25332272	25333095	+	959	NA	promoter-TSS (NR_027448)	promoter-TSS (NR_027448)	-60	NM_001029983	227619	Mm.270798	NM_001029983	ENSMUSG00000036646	Man1b1	E430019H13Rik|ERMan1|Gm108|MANA-ER	mannosidase, alpha, class 1B, member 1	protein-coding
chr1	180696612	180697349	+	543	NA	promoter-TSS (NM_013729)	promoter-TSS (NM_013729)	54	NM_013729	27217	Mm.103647	NM_013729	ENSMUSG00000026497	Mixl1	Mm1|Mml	Mix1 homeobox-like 1 (Xenopus laevis)	protein-coding
chr2	177305052	177305390	+	668	NA	Intergenic	(CA)n|Simple_repeat|Simple_repeat	-159521	NM_001177568	628308	Mm.460436	NM_001177568	ENSMUSG00000078866	Zfp970	Gm14420	zinc finger protein 970	protein-coding
chr5	121593283	121594283	+	767	NA	promoter-TSS (NM_009656)	promoter-TSS (NM_009656)	41	NM_001308450	11669	Mm.284446	NM_009656	ENSMUSG00000029455	Aldh2	AHD-M1|ALDH-E2|ALDHI|Ahd-5|Ahd5	aldehyde dehydrogenase 2, mitochondrial	protein-coding
chr9	44417718	44418304	+	583	NA	promoter-TSS (NR_151775)	promoter-TSS (NR_151775)	58	NR_151776	382073	Mm.259573	NM_201372	ENSMUSG00000043923	Ccdc84	D630044F24Rik|Gm1114	coiled-coil domain containing 84	protein-coding
chr2	120027361	120027686	+	980	NA	promoter-TSS (NM_001114637)	promoter-TSS (NM_001114637)	40	NM_001114637	433466	Mm.482417	NM_001114637	ENSMUSG00000098789	Jmjd7	-	jumonji domain containing 7	protein-coding
chr5	120887335	120887714	+	553	NA	promoter-TSS (NM_011852)	promoter-TSS (NM_011852)	89	NM_011852	23960	Mm.389688	NM_011852	ENSMUSG00000066861	Oas1g	AI449562|L2|Mmu-L|Mmu-L2|Oas1b|Oias-1|Oias1	2'-5' oligoadenylate synthetase 1G	protein-coding
chr9	20740454	20740791	+	828	NA	intron (NM_001357639, intron 1 of 5)	intron (NM_001357639, intron 1 of 5)	5674	NM_001357639	244723	Mm.293552	NM_173777	ENSMUSG00000032172	Olfm2	A030009A06Rik	olfactomedin 2	protein-coding
chr7	109021523	109021824	+	645	NA	intron (NM_021885, intron 3 of 11)	intron (NM_021885, intron 3 of 11)	10793	NM_021885	22141	Mm.439722	NM_021885	ENSMUSG00000031028	Tub	rd5|tub	tubby bipartite transcription factor	protein-coding
chr17	69255809	69256230	+	621	NA	intron (NM_001355734, intron 9 of 22)	intron (NM_001355734, intron 9 of 22)	21187	NR_045428	69750	Mm.439063	NR_045428	ENSMUSG00000100572	2410021H03Rik	-	RIKEN cDNA 2410021H03 gene	ncRNA
chr14	55671689	55672394	+	665	NA	promoter-TSS (NM_177992)	promoter-TSS (NM_177992)	-161	NM_008683	18002	Mm.296566	NM_008683	ENSMUSG00000010376	Nedd8	NEDD-8|Rub1	neural precursor cell expressed, developmentally down-regulated gene 8	protein-coding
chr4	92641263	92641650	+	540	NA	Intergenic	L1_Mus3|LINE|L1	-494235	NM_027034	69314	Mm.55891	NM_027034	ENSMUSG00000028533	Izumo3	1700011H22Rik	IZUMO family member 3	protein-coding
chr3	104780931	104781302	+	556	NA	promoter-TSS (NM_027982)	promoter-TSS (NM_027982)	60	NM_027982	71887	Mm.379204	NM_027982	ENSMUSG00000002228	Ppm1j	2310008J22Rik|PP2Czeta|Ppp2cz	protein phosphatase 1J	protein-coding
chr2	24974831	24976314	+	1000	NA	promoter-TSS (NM_001031808)	promoter-TSS (NM_001031808)	-461	NM_146251	241274	Mm.389243	NM_146251	ENSMUSG00000036833	Pnpla7	BC027342|E430013P11Rik|Nre	patatin-like phospholipase domain containing 7	protein-coding
chr11	120598285	120598776	+	1000	NA	promoter-TSS (NM_011568)	promoter-TSS (NM_011568)	-2	NM_001038230	66156	Mm.21645	NM_025389	ENSMUSG00000025135	Anapc11	1110011I19Rik|R75218	anaphase promoting complex subunit 11	protein-coding
chr1	134455211	134455801	+	1000	NA	promoter-TSS (NM_001311136)	promoter-TSS (NM_001311136)	-25	NM_001311136	240756	Mm.87398	NM_153128	ENSMUSG00000026455	Klhl12	C3ip1	kelch-like 12	protein-coding
chr9	122950657	122951444	+	596	NA	promoter-TSS (NM_010620)	promoter-TSS (NM_010620)	-31	NM_010620	209737	Mm.278920	NM_010620	ENSMUSG00000036768	Kif15	3110023M17Rik|3930402I10Rik|D330038N01|HKLP2|Knsl7|b2b1117.1Clo|b2b1117.1aClo	kinesin family member 15	protein-coding
chr11	116218722	116219292	+	890	NA	intron (NR_004853, intron 6 of 6)	intron (NR_004853, intron 6 of 6)	3005	NR_004853	69681	Mm.33677	NR_004853	ENSMUSG00000092300	Cdk3	2310050O10Rik|Cdk3-ps	cyclin-dependent kinase 3	pseudo
chr7	30972665	30973992	+	994	NA	promoter-TSS (NR_038860)	promoter-TSS (NR_038860)	141	NM_017405	54135	Mm.4067	NM_017405	ENSMUSG00000001247	Lsr	ILDR3|Lisch7	lipolysis stimulated lipoprotein receptor	protein-coding
chr9	21149698	21150157	+	1000	NA	promoter-TSS (NM_016742)	promoter-TSS (NM_016742)	-21	NM_016742	12539	Mm.32331	NM_016742	ENSMUSG00000019471	Cdc37	p50|p50Cdc37	cell division cycle 37	protein-coding
chr9	121642546	121642978	+	834	NA	promoter-TSS (NM_011703)	promoter-TSS (NM_011703)	46	NM_011703	22354	Mm.282007	NM_011703	ENSMUSG00000032528	Vipr1	AV071699|VIP-R1|VPAC1	vasoactive intestinal peptide receptor 1	protein-coding
chr4	155784056	155784707	+	782	NA	exon (NM_001033394, exon 2 of 2)	exon (NM_001033394, exon 2 of 2)	1493	NM_001033394	320587	Mm.384382	NM_001033394	ENSMUSG00000073680	Tmem88b	A230069A22Rik	transmembrane protein 88B	protein-coding
chr11	74925457	74926255	+	1000	NA	promoter-TSS (NM_001362743)	promoter-TSS (NM_001362743)	2	NM_001002764	103677	Mm.288460	NM_001002764	ENSMUSG00000038290	Smg6	AI317223|AU041178	Smg-6 homolog, nonsense mediated mRNA decay factor (C. elegans)	protein-coding
chr9	78448069	78448584	+	575	NA	exon (NM_026658, exon 1 of 12)	exon (NM_026658, exon 1 of 12)	116	NM_026658	68291	Mm.291779	NM_026658	ENSMUSG00000032342	Mto1	2310039H01Rik|5730419A02Rik	mitochondrial tRNA translation optimization 1	protein-coding
chr4	132344450	132345179	+	594	NA	intron (NM_001197082, intron 1 of 10)	intron (NM_001197082, intron 1 of 10)	936	NM_001197082	100088	Mm.255045	NM_133878	ENSMUSG00000028896	Rcc1	4931417M11Rik|AI326872|Chc1	regulator of chromosome condensation 1	protein-coding
chr6	71271251	71272217	+	1000	NA	promoter-TSS (NM_001354706)	promoter-TSS (NM_001354706)	57	NM_001354706	57896	Mm.250569	NM_145568	ENSMUSG00000053012	Krcc1	AA792894	lysine-rich coiled-coil 1	protein-coding
chr10	117277891	117278797	+	579	NA	intron (NM_017372, intron 3 of 3)	intron (NM_017372, intron 3 of 3)	3928	NM_017372	17105	Mm.45436	NM_017372	ENSMUSG00000069516	Lyz2	AI326280|Lys|Lysm|Lyzf2|Lyzs|Lzm|Lzm-s1|Lzp	lysozyme 2	protein-coding
chr7	45333112	45333889	+	637	NA	intron (NM_175130, intron 1 of 24)	CpG-13108	280	NM_175130	68667	Mm.439890	NM_175130	ENSMUSG00000038260	Trpm4	1110030C19Rik|AW047689|LTRPC4|LTrpC-4|TRPM4B	transient receptor potential cation channel, subfamily M, member 4	protein-coding
chr9	108460395	108460908	+	632	NA	intron (NM_133744, intron 1 of 1)	CpG	133	NM_133744	72454	Mm.46488	NM_133744	ENSMUSG00000049305	Ccdc71	2600016J21Rik	coiled-coil domain containing 71	protein-coding
chr7	66387965	66388457	+	620	NA	intron (NM_146191, intron 1 of 33)	CpG	130	NM_146191	233328	Mm.33284	NM_146191	ENSMUSG00000015133	Lrrk1	AW319595|C230002E15Rik|D130026O16Rik|mKIAA1790	leucine-rich repeat kinase 1	protein-coding
chr17	35016358	35016984	+	913	NA	promoter-TSS (NM_001347347)	promoter-TSS (NM_001347347)	92	NM_001347347	27762	Mm.56895	NM_138582	ENSMUSG00000007030	Vwa7	C6orf27|D17H6S56E-3|G7c|NG37	von Willebrand factor A domain containing 7	protein-coding
chr8	94838000	94838891	+	884	NA	promoter-TSS (NM_134141)	promoter-TSS (NM_134141)	32	NM_026452	67914	Mm.169234	NM_026452	ENSMUSG00000031782	Coq9	2310005O14Rik|C78387	coenzyme Q9	protein-coding
chr4	132260567	132261717	+	738	NA	intron (NM_001122992, intron 1 of 10)	CpG	407	NM_001122992	56809	Mm.103489	NM_020273	ENSMUSG00000028901	Gmeb1	1110050A04Rik|AI256615|AI481278	glucocorticoid modulatory element binding protein 1	protein-coding
chr7	18957678	18958578	+	853	NA	exon (NM_001029877, exon 4 of 4)	exon (NM_001029877, exon 4 of 4)	-29396	NM_194064	378430	Mm.277153	NM_194064	ENSMUSG00000051965	Nanos2	nos2	nanos C2HC-type zinc finger 2	protein-coding
chr5	137553428	137554384	+	616	NA	intron (NM_031404, intron 1 of 13)	intron (NM_031404, intron 1 of 13)	360	NM_031404	83766	Mm.31646	NM_031404	ENSMUSG00000029712	Actl6b	Actl6|ArpNa|Baf53b	actin-like 6B	protein-coding
chr7	44553899	44554084	+	545	NA	promoter-TSS (NM_001285519)	promoter-TSS (NM_001285519)	-26	NM_001285519	22260	Mm.968	NM_009473	ENSMUSG00000060601	Nr1h2	AI194859|LXR|LXRB|LXRBSV|LXRbeta|NER1|OR-1|RIP15|UR|Unr|Unr2	nuclear receptor subfamily 1, group H, member 2	protein-coding
chrX	38042386	38042722	+	617	NA	intron (NM_001034856, intron 1 of 4)	intron (NM_001034856, intron 1 of 4)	560	NM_001034856	194735	Mm.422929	NM_001034856	ENSMUSG00000098348	Btg1-ps2	4930430D24Rik	B cell translocation gene 1, anti-proliferative, pseudogene 2	protein-coding
chr6	115823482	115823656	+	647	NA	exon (NM_001110506, exon 2 of 9)	exon (NM_001110506, exon 2 of 9)	-14826	NM_172086	19951	Mm.104368	NM_172086	ENSMUSG00000057841	Rpl32	AU020185|rpL32-3A	ribosomal protein L32	protein-coding
chr9	50727835	50728322	+	772	NA	promoter-TSS (NM_178118)	promoter-TSS (NM_178118)	-94	NM_178118	330938	Mm.82598	NM_178118	ENSMUSG00000032064	Dixdc1	4930563F16Rik|BC048182|Ccd1|Ccd1Aalpha1L|Ccd1Abeta1L|Ccd1BalphaL|Ccd1BbetaL|Ccd1CL|mKIAA1735	DIX domain containing 1	protein-coding
chr2	26351295	26352169	+	573	NA	TTS (NM_001037747)	TTS (NM_001037747)	378	NM_026828	52838	Mm.31239	NM_026828	ENSMUSG00000075467	Dnlz	1110034G11Rik|D2Bwg1335e|HEP1	DNL-type zinc finger	protein-coding
chr2	167280714	167281336	+	545	NA	Intergenic	Intergenic	-40420	NM_008968	19223	Mm.2339	NM_008968	ENSMUSG00000017969	Ptgis	Cyp8|Cyp8a1|Pgis	prostaglandin I2 (prostacyclin) synthase	protein-coding
chr4	126753198	126754061	+	1000	NA	promoter-TSS (NM_011986)	promoter-TSS (NM_011986)	74	NM_001035525	100317	Mm.206206	NM_133886	ENSMUSG00000028830	AU040320	A730047D20Rik|AAVR|Kiaa0319l	expressed sequence AU040320	protein-coding
chr10	117906261	117906758	+	795	NA	Intergenic	Intergenic	-18950	NR_045342	71067	Mm.410793	NR_045342	ENSMUSG00000112500	4933411E08Rik	-	RIKEN cDNA 4933411E08 gene	ncRNA
chr11	98358045	98358699	+	819	NA	promoter-TSS (NM_021547)	promoter-TSS (NM_021547)	4	NM_021547	59045	Mm.265546	NM_021547	ENSMUSG00000018167	Stard3	Mln64|es64	START domain containing 3	protein-coding
chr11	102096679	102097350	+	662	NA	Intergenic	Intergenic	4305	NM_008918	19064	Mm.1269	NM_008918	ENSMUSG00000017316	Ppy	AV061413|IGSPP|PP	pancreatic polypeptide	protein-coding
chr4	133632922	133633671	+	1000	NA	exon (NM_001017968, exon 1 of 8)	exon (NM_001017968, exon 1 of 8)	133	NM_001017968	503610	Mm.331948	NM_001017968	ENSMUSG00000037553	Zdhhc18	-	zinc finger, DHHC domain containing 18	protein-coding
chr11	28583571	28584372	+	643	NA	5' UTR (NM_001166661, exon 1 of 4)	5' UTR (NM_001166661, exon 1 of 4)	353	NM_001166661	216613	Mm.93759	NM_181577	ENSMUSG00000032878	Ccdc85a	-	coiled-coil domain containing 85A	protein-coding
chr19	6910360	6910596	+	571	NA	promoter-TSS (NM_001358444)	promoter-TSS (NM_001358444)	-372	NM_012021	54683	Mm.279782	NM_012021	ENSMUSG00000024953	Prdx5	AOEB166|AOPP|PLP|Pmp20|Prdx6|PrxV	peroxiredoxin 5	protein-coding
chr3	108879896	108880515	+	599	NA	intron (NM_177091, intron 4 of 12)	intron (NM_177091, intron 4 of 12)	9803	NM_177091	320181	Mm.244233	NM_177091	ENSMUSG00000045326	Fndc7	E230011A21Rik	fibronectin type III domain containing 7	protein-coding
chr11	9048438	9049120	+	691	NA	5' UTR (NM_001037928, exon 1 of 7)	5' UTR (NM_001037928, exon 1 of 7)	187	NM_001037928	626870	Mm.369429	NM_001037928	ENSMUSG00000040978	Gm11992	-	predicted gene 11992	protein-coding
chr10	51677562	51678257	+	564	NA	exon (NM_001159389, exon 1 of 19)	exon (NM_001159389, exon 1 of 19)	149	NM_001159389	320995	Mm.109190	NM_177306	ENSMUSG00000019900	Rfx6	4930572O07Rik|Rfxdc1	regulatory factor X, 6	protein-coding
chr7	126695661	126696219	+	1000	NA	promoter-TSS (NM_029420)	promoter-TSS (NM_029420)	-60	NM_175103	66162	Mm.358692	NM_175103	ENSMUSG00000047721	Bola2	1110025L05Rik|BolA-2	bolA-like 2 (E. coli)	protein-coding
chr3	127779987	127780669	+	714	NA	5' UTR (NM_027808, exon 1 of 14)	5' UTR (NM_027808, exon 1 of 14)	199	NM_027808	71481	Mm.158704	NM_027808	ENSMUSG00000028028	Alpk1	8430410J10Rik|LAK	alpha-kinase 1	protein-coding
chr15	88399828	88400259	+	542	NA	Intergenic	Intergenic	85169	NR_045281	328579	Mm.146839	NR_045281	ENSMUSG00000116331	B230214G05Rik	B230214G05	RIKEN cDNA B230214G05 gene	ncRNA
chr8	25784842	25785670	+	984	NA	promoter-TSS (NM_026032)	promoter-TSS (NM_026032)	-47	NM_026121	67384	Mm.118400	NM_026121	ENSMUSG00000037316	Bag4	2410112I15Rik|SODD	BCL2-associated athanogene 4	protein-coding
chr9	50767710	50768647	+	865	NA	promoter-TSS (NM_023483)	promoter-TSS (NM_023483)	6	NM_023483	68721	Mm.171374	NM_023483	ENSMUSG00000037971	1110032A03Rik	4930500N06Rik|c11orf1	RIKEN cDNA 1110032A03 gene	protein-coding
chr4	108847808	108848554	+	590	NA	exon (NM_029571, exon 1 of 1)	exon (NM_029571, exon 1 of 1)	324	NM_029571	100087	Mm.440007	NM_029571	ENSMUSG00000073775	Kti12	1110001A12Rik|AI326810|AU014758	KTI12 homolog, chromatin associated	protein-coding
chr16	4885796	4886877	+	1000	NA	5' UTR (NM_029657, exon 1 of 17)	5' UTR (NM_029657, exon 1 of 17)	236	NM_001252437	17237	Mm.291326	NM_029657	ENSMUSG00000022517	Mgrn1	2610042J20Rik|mKIAA0544|md|nc	mahogunin, ring finger 1	protein-coding
chr9	21509885	21510642	+	789	NA	promoter-TSS (NM_001324510)	promoter-TSS (NM_001324510)	-29	NR_136912	17083	Mm.196618	NM_010744	ENSMUSG00000032180	Tmed1	Il1rl1l|Ly84l|St2l	transmembrane p24 trafficking protein 1	protein-coding
chr15	88819027	88819697	+	1000	NA	promoter-TSS (NM_145477)	promoter-TSS (NM_145477)	-44	NM_145477	223774	Mm.41512	NM_145477	ENSMUSG00000035845	Alg12	ECM39	asparagine-linked glycosylation 12 (alpha-1,6-mannosyltransferase)	protein-coding
chr10	52399788	52400095	+	629	NA	intron (NM_025684, intron 1 of 2)	intron (NM_025684, intron 1 of 2)	8333	NM_025684	66650	Mm.90950	NM_025684	ENSMUSG00000038624	Nepn	5730521E12Rik|Npn|periolin	nephrocan	protein-coding
chr5	38684282	38684922	+	880	NA	intron (NM_001081144, intron 1 of 3)	CpG	224	NM_001081144	100515	Mm.38277	NM_001081144	ENSMUSG00000046572	Zfp518b	6820424L24Rik|AA410078|AI661722|Znf518b	zinc finger protein 518B	protein-coding
chr15	98831180	98831666	+	1000	NA	promoter-TSS (NM_016781)	promoter-TSS (NM_016781)	85	NM_016781	19082	Mm.6670	NM_016781	ENSMUSG00000067713	Prkag1	AA571379|BB036179|Prkaac	protein kinase, AMP-activated, gamma 1 non-catalytic subunit	protein-coding
chr13	94358422	94359182	+	589	NA	promoter-TSS (NM_009680)	promoter-TSS (NM_009680)	121	NR_045619	328309	Mm.174191	NM_183205	ENSMUSG00000042857	Gm9776	A530089L17	predicted gene 9776	ncRNA
chr4	41713304	41713974	+	638	NA	promoter-TSS (NM_027278)	promoter-TSS (NM_027278)	-122	NM_027278	69961	Mm.425182	NM_027278	ENSMUSG00000036114	Rpp25l	2810432D09Rik|AW987258|Rppl25	ribonuclease P/MRP 25 subunit-like	protein-coding
chr9	77655023	77655851	+	752	NA	exon (NM_172925, exon 3 of 3)	exon (NM_172925, exon 3 of 3)	18705	NM_172925	244923	Mm.138238	NM_172925	ENSMUSG00000044938	Klhl31	9830147P19Rik|D930047P17Rik|Kbtbd1	kelch-like 31	protein-coding
chr2	156119606	156119986	+	649	NA	Intergenic	MERVL_2A-int|LTR|ERVL	-7831	NM_170590	266692	Mm.27660	NM_170588	ENSMUSG00000074643	Cpne1	1810028N16Rik|mKIAA4108	copine I	protein-coding
chr10	107501824	107502056	+	698	NA	Intergenic	Intergenic	-7217	NM_008657	17878	Mm.11	NM_008657	ENSMUSG00000035923	Myf6	MRF4|bHLHc4|herculin	myogenic factor 6	protein-coding
chr2	181364655	181366053	+	1000	NA	promoter-TSS (NM_001048148)	promoter-TSS (NM_001048148)	50	NM_029702	76688	Mm.87720	NM_029702	ENSMUSG00000038671	Arfrp1	1500006I01Rik|AI480700	ADP-ribosylation factor related protein 1	protein-coding
chr5	64579621	64579989	+	542	NA	Intergenic	Intergenic	30894	NR_045078	100042198	Mm.25191	NR_045078	ENSMUSG00000105402	Gm3716	Gm1683	predicted gene 3716	ncRNA
chr1	97976909	97977438	+	655	NA	5' UTR (NM_013626, exon 2 of 26)	5' UTR (NM_013626, exon 2 of 26)	70620	NR_037993	78603	Mm.442597	NR_037993	ENSMUSG00000089706	B230216N24Rik	-	RIKEN cDNA B230216N24 gene	ncRNA
chrX	53056957	53057528	+	908	NA	promoter-TSS (NR_038185)	promoter-TSS (NR_038185)	-52	NR_038185	72575	Mm.59516	NR_038184		C430049B03Rik	2700063P19Rik|9430052C07Rik|mir-322|mir-351|mir-503	RIKEN cDNA C430049B03 gene	ncRNA
chr9	65101204	65101965	+	617	NA	promoter-TSS (NM_001290315)	promoter-TSS (NM_001290315)	98	NM_001290315	56741	Mm.209041	NM_020043	ENSMUSG00000032816	Igdcc4	DDM36|Nope	immunoglobulin superfamily, DCC subclass, member 4	protein-coding
chr13	56443352	56443785	+	544	NA	intron (NM_177809, intron 2 of 7)	intron (NM_177809, intron 2 of 7)	5213	NM_177809	328258	Mm.482177	NM_177809	ENSMUSG00000021509	Slc25a48	AU042651|E230025K15	solute carrier family 25, member 48	protein-coding
chr7	144336689	144337087	+	583	NA	intron (NM_001081370, intron 2 of 10)	intron (NM_001081370, intron 2 of 10)	52494	NM_001081370	210274	Mm.483624	NM_001081370	ENSMUSG00000037541	Shank2	ProSAP1|mKIAA1022	SH3 and multiple ankyrin repeat domains 2	protein-coding
chr1	163994537	163995140	+	591	NA	promoter-TSS (NM_027279)	promoter-TSS (NM_027279)	-42	NM_001357049	381306	Mm.28152	NM_201364	ENSMUSG00000041406	BC055324	-	cDNA sequence BC055324	protein-coding
chr7	142470755	142471168	+	544	NA	promoter-TSS (NM_001271508)	promoter-TSS (NM_001271508)	-882	NM_019391	16985	Mm.234003	NM_019391	ENSMUSG00000018819	Lsp1	Lsp-1|WP34|p50|pp52	lymphocyte specific 1	protein-coding
chr6	38134656	38135377	+	573	NA	intron (NM_194061, intron 18 of 19)	RMER1A|Other|Other	-10430	NM_080467	140494	Mm.462308	NM_080467	ENSMUSG00000038600	Atp6v0a4	Atp6n1b|a4	ATPase, H+ transporting, lysosomal V0 subunit A4	protein-coding
chr1	53352285	53352876	+	1000	NA	exon (NM_001353501, exon 1 of 4)	exon (NM_001353501, exon 1 of 4)	172	NM_001290984	70396	Mm.285783	NM_133728	ENSMUSG00000026095	Asnsd1	2210409M21Rik	asparagine synthetase domain containing 1	protein-coding
chr11	60776554	60777721	+	900	NA	promoter-TSS (NM_175491)	promoter-TSS (NM_175491)	228	NM_009410	21975	Mm.10708	NM_009410	ENSMUSG00000002814	Top3a	-	topoisomerase (DNA) III alpha	protein-coding
chr7	29983555	29984398	+	760	NA	promoter-TSS (NM_001167873)	promoter-TSS (NM_001167873)	21	NM_001167872	243905	Mm.322432	NM_001033355	ENSMUSG00000074221	Zfp568	C80731|Gm1691|Znf568|chato	zinc finger protein 568	protein-coding
chr12	110836080	110836346	+	584	NA	intron (NM_011973, intron 1 of 11)	intron (NM_011973, intron 1 of 11)	4726	NM_011973	26448	Mm.140948	NM_011973	ENSMUSG00000056458	Mok	RAGE1|Rage|Stk30	MOK protein kinase	protein-coding
chr17	37083414	37083730	+	565	NA	Intergenic	Intergenic	2664	NM_146477	258469	Mm.271392	NM_146477	ENSMUSG00000056600	Olfr90	MOR256-21|bM573K1.2	olfactory receptor 90	protein-coding
chr10	76468769	76469173	+	588	NA	promoter-TSS (NM_019434)	promoter-TSS (NM_019434)	69	NM_019434	54387	Mm.30098	NM_019434	ENSMUSG00000001150	Mcm3ap	GANP	minichromosome maintenance complex component 3 associated protein	protein-coding
chr6	24707000	24707484	+	598	NA	Intergenic	Intergenic	-26003	NM_028920	74409	Mm.87331	NM_028920	ENSMUSG00000029679	Hyal6	4932701A20Rik|Hyal-ps1|Hyalp1	hyaluronoglucosaminidase 6	protein-coding
chr1	58423389	58424224	+	727	NA	intron (NM_001042634, intron 1 of 12)	CpG	282	NM_001042634	12747	Mm.1761	NM_009905	ENSMUSG00000026034	Clk1	STY	CDC-like kinase 1	protein-coding
chr3	96160181	96160545	+	581	NA	3' UTR (NM_001025614, exon 12 of 12)	3' UTR (NM_001025614, exon 12 of 12)	-1607	NM_181409	194126	Mm.268536	NM_181409	ENSMUSG00000045934	Mtmr11	AI035306|BC051083|Cra	myotubularin related protein 11	protein-coding
chr16	20717071	20718025	+	874	NA	promoter-TSS (NM_009900)	promoter-TSS (NM_009900)	-278	NM_145632	245841	Mm.288730	NM_145632	ENSMUSG00000021018	Polr2h	-	polymerase (RNA) II (DNA directed) polypeptide H	protein-coding
chr2	163532030	163532358	+	686	NA	intron (NM_001312907, intron 1 of 10)	intron (NM_001312907, intron 1 of 10)	9527	NR_027970	68314	Mm.46190	NM_197983	ENSMUSG00000046840	Hnf4aos	0610008F07Rik	hepatic nuclear factor 4 alpha, opposite strand	ncRNA
chr6	66119981	66120490	+	708	NA	Intergenic	MLTR14|LTR|ERV1	-152270	NR_136927	102633773	Mm.272086	NR_136927	ENSMUSG00000107653	Gm31520	-	sterol-C5-desaturase pseudogene	pseudo
chr13	55570818	55571243	+	585	NA	promoter-TSS (NM_145382)	promoter-TSS (NM_145382)	90	NM_145382	212483	Mm.35661	NM_145382	ENSMUSG00000021495	Fam193b	IRIZIO|Kiaa1931	family with sequence similarity 193, member B	protein-coding
chr17	27028316	27028977	+	897	NA	promoter-TSS (NM_007523)	promoter-TSS (NM_007523)	-19	NM_007523	12018	Mm.2443	NM_007523	ENSMUSG00000057789	Bak1	Bak|N-BAK1|N-Bak	BCL2-antagonist/killer 1	protein-coding
chr5	124712286	124713435	+	558	NA	intron (NM_011596, intron 11 of 19)	intron (NM_011596, intron 11 of 19)	-12225	NM_019536	56087	Mm.261014	NM_019536	ENSMUSG00000038011	Dnah10	Dnahc10	dynein, axonemal, heavy chain 10	protein-coding
chr5	115272183	115272971	+	663	NA	5' UTR (NM_016698, exon 1 of 17)	5' UTR (NM_016698, exon 1 of 17)	318	NM_001302448	50849	Mm.30051	NM_016698	ENSMUSG00000041740	Rnf10	AA675014|RIE2|mKIAA0262	ring finger protein 10	protein-coding
chr5	77354584	77354864	+	560	NA	intron (NM_008048, intron 2 of 4)	intron (NM_008048, intron 2 of 4)	44240	NM_153798	231329	Mm.273217	NM_153798	ENSMUSG00000029250	Polr2b	Pol2rb|Rpb140|Rpb2	polymerase (RNA) II (DNA directed) polypeptide B	protein-coding
chrX	140456427	140456890	+	612	NA	promoter-TSS (NM_021463)	promoter-TSS (NM_021463)	55	NM_021463	19139	Mm.287178	NM_021463	ENSMUSG00000031432	Prps1	2310010D17Rik|C76571|C76678|PRS-I|Prps-1	phosphoribosyl pyrophosphate synthetase 1	protein-coding
chr7	38271251	38271486	+	614	NA	promoter-TSS (NM_025390)	promoter-TSS (NM_025390)	-20	NM_025390	66161	Mm.22284	NM_025390	ENSMUSG00000030423	Pop4	1110023P21Rik|Rpp29	processing of precursor 4, ribonuclease P/MRP family, (S. cerevisiae)	protein-coding
chr2	120609020	120609658	+	657	NA	promoter-TSS (NM_001159612)	promoter-TSS (NM_001159612)	19	NM_001159612	66606	Mm.428639	NM_025657	ENSMUSG00000027286	Lrrc57	2810002D13Rik|AA407405	leucine rich repeat containing 57	protein-coding
chr3	51396286	51396866	+	558	NA	promoter-TSS (NR_028121)	promoter-TSS (NR_028121)	-29	NR_028121	67749	Mm.273339	NM_026358	ENSMUSG00000037161	Mgarp	4930583H14Rik|AI195347|CESP-1|HUMMR|Osap|Qsap	mitochondria localized glutamic acid rich protein	protein-coding
chr9	33728173	33728426	+	548	NA	Intergenic	CpG	-314072	NR_040744	77119	Mm.367930	NR_040744	ENSMUSG00000098758	7630403G23Rik	TH-cre|Tg(Th-cre)1Tmd	RIKEN cDNA 7630403G23 gene	ncRNA
chr5	38397201	38397634	+	725	NA	intron (NM_001102415, intron 5 of 9)	intron (NM_001102415, intron 5 of 9)	53028	NR_046191	78172	Mm.243835	NR_046191	ENSMUSG00000106932	4930487D11Rik	-	RIKEN cDNA 4930487D11 gene	ncRNA
chr10	122047127	122047999	+	693	NA	promoter-TSS (NM_001242411)	promoter-TSS (NM_001242411)	-248	NM_001081037	117600	Mm.288698	NM_001081037	ENSMUSG00000020121	Srgap1	4930572H05Rik|Arhgap13	SLIT-ROBO Rho GTPase activating protein 1	protein-coding
chr2	48948876	48949635	+	1000	NA	promoter-TSS (NM_011958)	promoter-TSS (NM_011958)	12	NR_033442	26428	Mm.291059	NM_011958	ENSMUSG00000026761	Orc4	Orc4P|Orc4l|mMmORC4	origin recognition complex, subunit 4	protein-coding
chr10	116996057	116996654	+	1000	NA	intron (NM_001007583, intron 4 of 9)	intron (NM_001007583, intron 4 of 9)	10041	NM_001007583	382427	Mm.339322	NM_001007583	ENSMUSG00000020169	Best3	Vmd2l3|mBest4	bestrophin 3	protein-coding
chr4	132329137	132329693	+	879	NA	5' UTR (NM_027925, exon 1 of 9)	5' UTR (NM_027925, exon 1 of 9)	123	NM_027925	71787	Mm.239183	NM_027925	ENSMUSG00000028898	Trnau1ap	1110007F05Rik|AA387999|Secp43|Trspap1|WI1-2643G14.2	tRNA selenocysteine 1 associated protein 1	protein-coding
chr6	127147777	127147983	+	613	NA	intron (NM_009829, intron 2 of 4)	intron (NM_009829, intron 2 of 4)	-1509	NR_040274	77558	Mm.358918	NR_040273	ENSMUSG00000097166	9330179D12Rik	-	RIKEN cDNA 9330179D12 gene	ncRNA
chr11	59717642	59718327	+	546	NA	intron (NM_001368931, intron 3 of 23)	intron (NM_001368931, intron 3 of 23)	22170	NR_045476	69320	Mm.443242	NR_045476	ENSMUSG00000086330	1700007J10Rik	4930573L17Rik	RIKEN cDNA 1700007J10 gene	ncRNA
chr5	122049723	122050603	+	683	NA	promoter-TSS (NM_001312908)	promoter-TSS (NM_001312908)	-312	NM_001312908	13048	Mm.156172	NM_007804	ENSMUSG00000042589	Cux2	1700051K22Rik|Cutl2|Cux-2	cut-like homeobox 2	protein-coding
chr7	127875621	127876735	+	580	NA	promoter-TSS (NM_001362191)	promoter-TSS (NM_001362191)	-536	NM_001362191	244219	Mm.207872	NM_146259	ENSMUSG00000049728	Zfp668	BC030314|E130018B19Rik|Znf668	zinc finger protein 668	protein-coding
chr2	164968199	164968758	+	578	NA	intron (NM_020333, intron 1 of 25)	CpG	490	NM_020333	57138	Mm.252987	NM_020333	ENSMUSG00000017740	Slc12a5	KCC2|mKIAA1176	solute carrier family 12, member 5	protein-coding
chr1	134244297	134244797	+	604	NA	Intergenic	Intergenic	-9090	NM_001282945	11539	Mm.298908	NM_009629	ENSMUSG00000042429	Adora1	A1-AR|A1AR|A1R|AA1R|AI848715|ARA1|BB176431|Ri	adenosine A1 receptor	protein-coding
chr4	139130299	139131239	+	1000	NA	intron (NM_001163006, intron 1 of 3)	CpG	268	NR_033745	433771	Mm.305990	NM_001163006	ENSMUSG00000050608	Micos10	2310028O11Rik|Minos1	mitochondrial contact site and cristae organizing system subunit 10	protein-coding
chr3	89246252	89246819	+	560	NA	promoter-TSS (NM_183037)	promoter-TSS (NM_183037)	62	NM_001310625	66059	Mm.177991	NM_025327	ENSMUSG00000042747	Krtcap2	0610010I12Rik|Kcp2	keratinocyte associated protein 2	protein-coding
chr4	143211872	143213159	+	899	NA	intron (NM_001081355, intron 1 of 9)	CpG	194	NM_001256380	110593	Mm.332020	NM_001081355	ENSMUSG00000057637	Prdm2	4833427P12Rik|E330024L24Rik|Gm1033|Gm19732|KMT8|Riz|Riz1|Znfpr1c1	PR domain containing 2, with ZNF domain	protein-coding
chr7	45286535	45286810	+	562	NA	intron (NM_001033176, intron 2 of 5)	intron (NM_001033176, intron 2 of 5)	3799	NM_001033176	76713	Mm.425445	NM_001033176	ENSMUSG00000070568	Slc6a21	1700039E15Rik|Gm19188	solute carrier family 6 member 21	protein-coding
chr11	78037788	78038520	+	635	NA	TTS (NM_183286)	TTS (NM_183286)	223	NM_001362626	14252	Mm.130227	NM_008028	ENSMUSG00000061981	Flot2	AI573412|Esa|reggie-2	flotillin 2	protein-coding
chr1	90896780	90897083	+	668	NA	Intergenic	Intergenic	-18169	NM_053015	171531	Mm.105208	NM_053015	ENSMUSG00000026303	Mlph	2210418F23Rik|5031433I09Rik|AW228792|D1Wsu84e|Slac-2a|l(1)-3Rk|l1Rk3|ln	melanophilin	protein-coding
chr7	140955385	140956546	+	716	NA	promoter-TSS (NM_030694)	promoter-TSS (NM_030694)	-4	NM_030694	80876	Mm.379266	NM_030694	ENSMUSG00000060591	Ifitm2	DSPA2c|Ifitm3l|fragilis3|mil-3	interferon induced transmembrane protein 2	protein-coding
chr18	36782519	36783774	+	942	NA	promoter-TSS (NM_080636)	promoter-TSS (NM_080636)	59	NM_008214	15115	Mm.10528	NM_008214	ENSMUSG00000001380	Hars	MMHRS	histidyl-tRNA synthetase	protein-coding
chr15	102326015	102326543	+	598	NA	intron (NM_027044, intron 1 of 5)	CpG	163	NM_027044	56612	Mm.158264	NM_020031	ENSMUSG00000001289	Pfdn5	1190001O17Rik|1700010A06Rik|D15Ertd697e|Eig1|MM-1	prefoldin 5	protein-coding
chr5	135794363	135795081	+	714	NA	Intergenic	Intergenic	16073	NM_008617	17448	Mm.297096	NM_008617	ENSMUSG00000019179	Mdh2	MDH|Mdh-2|Mor-1|Mor1	malate dehydrogenase 2, NAD (mitochondrial)	protein-coding
chr13	73937093	73938151	+	577	NA	promoter-TSS (NM_001024508)	promoter-TSS (NM_001024508)	145	NM_027182	69716	Mm.275095	NM_027182	ENSMUSG00000021569	Trip13	2410002G23Rik|D13Ertd328e	thyroid hormone receptor interactor 13	protein-coding
chr6	127079768	127080536	+	638	NA	exon (NM_022657, exon 3 of 3)	exon (NM_022657, exon 3 of 3)	7250	NM_022657	64654	Mm.347933	NM_022657	ENSMUSG00000000182	Fgf23	-	fibroblast growth factor 23	protein-coding
chr5	30154429	30155715	+	684	NA	promoter-TSS (NM_001289798)	promoter-TSS (NM_001289798)	-92	NM_178878	97212	Mm.200497	NM_178878	ENSMUSG00000025745	Hadha	C77020|Mtpa|TP-alpha	hydroxyacyl-Coenzyme A dehydrogenase/3-ketoacyl-Coenzyme A thiolase/enoyl-Coenzyme A hydratase (trifunctional protein), alpha subunit	protein-coding
chr7	102113171	102113586	+	595	NA	exon (NM_001081424, exon 4 of 5)	exon (NM_001081424, exon 4 of 5)	3335	NM_001081424	504186	Mm.334074	NM_001081424	ENSMUSG00000066279	Chrna10	-	cholinergic receptor, nicotinic, alpha polypeptide 10	protein-coding
chr7	44496129	44496952	+	1000	NA	promoter-TSS (NM_197991)	promoter-TSS (NM_197991)	-27	NM_001355107	69683	Mm.294759	NM_197991	ENSMUSG00000008140	Emc10	2310044H10Rik|5430410O10Rik|Inm02|Mirta22	ER membrane protein complex subunit 10	protein-coding
chr11	82990773	82991267	+	687	NA	intron (NM_172796, intron 1 of 4)	intron (NM_172796, intron 1 of 4)	810	NM_172796	237886	Mm.270253	NM_172796	ENSMUSG00000069793	Slfn9	9830137M10Rik	schlafen 9	protein-coding
chr9	45138282	45139050	+	677	NA	promoter-TSS (NM_001013390)	promoter-TSS (NM_001013390)	42	NM_001013390	399548	Mm.335112	NM_001013390	ENSMUSG00000046480	Scn4b	Gm1471	sodium channel, type IV, beta	protein-coding
chr9	95749642	95750564	+	634	NA	5' UTR (NM_001311123, exon 1 of 12)	5' UTR (NM_001311123, exon 1 of 12)	245	NM_011643	22063	Mm.149633	NM_011643	ENSMUSG00000032839	Trpc1	Mtrp1|Trp1|Trrp1	transient receptor potential cation channel, subfamily C, member 1	protein-coding
chr4	131843289	131843755	+	884	NA	promoter-TSS (NM_025297)	promoter-TSS (NM_025297)	51	NM_025297	26922	Mm.192706	NM_025297	ENSMUSG00000028910	Mecr	AI195831|NRBF-1|Nrbf1	mitochondrial trans-2-enoyl-CoA reductase	protein-coding
chr12	26469015	26470065	+	614	NA	exon (NM_020557, exon 1 of 5)	exon (NM_020557, exon 1 of 5)	325	NM_020557	22169	Mm.271839	NM_020557	ENSMUSG00000020638	Cmpk2	1200004E04Rik|TDKI|Tyki	cytidine monophosphate (UMP-CMP) kinase 2, mitochondrial	protein-coding
chr7	16476328	16476943	+	711	NA	intron (NM_008718, intron 1 of 11)	CpG	145	NM_008718	18142	Mm.145821	NM_008718	ENSMUSG00000001988	Npas1	MOP5|bHLHe11	neuronal PAS domain protein 1	protein-coding
chr10	112810203	112810510	+	785	NA	Intergenic	MER117|DNA|hAT-Charlie	-27396	NR_152199	100042639	Mm.403280	NR_152199		Gm3942	-	predicted gene 3942	ncRNA
chr17	25133266	25133705	+	682	NA	promoter-TSS (NM_011930)	promoter-TSS (NM_011930)	94	NM_011930	26373	Mm.270587	NM_011930	ENSMUSG00000036636	Clcn7	ClC-7|D17Wsu51e	chloride channel, voltage-sensitive 7	protein-coding
chr6	83711039	83711506	+	831	NA	promoter-TSS (NM_011912)	promoter-TSS (NM_011912)	33	NM_011912	24113	Mm.307165	NM_011912	ENSMUSG00000034777	Vax2	Dres93	ventral anterior homeobox 2	protein-coding
chr7	45920613	45920902	+	578	NA	promoter-TSS (NM_001146346)	promoter-TSS (NM_001146346)	92	NM_001146346	13732	Mm.20829	NM_010129	ENSMUSG00000040212	Emp3	H-4|H4|HNMP-1|MI-35|Ymp	epithelial membrane protein 3	protein-coding
chr7	19359932	19360620	+	662	NA	promoter-TSS (NM_145822)	promoter-TSS (NM_145822)	-793	NM_145822	70333	Mm.171370	NM_145822	ENSMUSG00000047649	Cd3eap	1190028F09|2610103M17Rik|ASE-1|Ase1|CAST|PAF49	CD3E antigen, epsilon polypeptide associated protein	protein-coding
chr2	162682734	162683137	+	554	NA	Intergenic	Intergenic	21772	NR_033569	77288	Mm.376571	NR_033569		9430021M05Rik	-	RIKEN cDNA 9430021M05 gene	ncRNA
chr5	115429454	115430163	+	554	NA	intron (NM_008629, intron 1 of 14)	CpG	123	NM_008629	17690	Mm.5077	NM_008629	ENSMUSG00000054256	Msi1	Msi1h|Musahi1|m-Msi-1	musashi RNA-binding protein 1	protein-coding
chr3	92944208	92944672	+	664	NA	promoter-TSS (NM_033175)	promoter-TSS (NM_033175)	-46	NM_033175	94060	Mm.301748	NM_033175	ENSMUSG00000045475	Lce3c	2300007B01Rik|AV076207|Eig3|Sprrl1	late cornified envelope 3C	protein-coding
chr4	140837887	140838393	+	586	NA	intron (NM_011059, intron 1 of 15)	intron (NM_011059, intron 1 of 15)	7638	NM_011059	18599	Mm.20854	NM_011059	ENSMUSG00000025329	Padi1	AV236283|Pdi1	peptidyl arginine deiminase, type I	protein-coding
chr16	91010755	91011694	+	1000	NA	promoter-TSS (NM_001045515)	promoter-TSS (NM_001045515)	-25	NR_028368	67394	Mm.491293	NR_028368	ENSMUSG00000087354	4930404I05Rik	-	RIKEN cDNA 4930404I05 gene	ncRNA
chr10	79926612	79927081	+	726	NA	promoter-TSS (NM_007880)	promoter-TSS (NM_007880)	-197	NM_001288626	13496	Mm.301282	NM_007880	ENSMUSG00000019564	Arid3a	Bright|Dri1|Dril1	AT rich interactive domain 3A (BRIGHT-like)	protein-coding
chr12	101912389	101913411	+	587	NA	non-coding (NR_152255, exon 1 of 2)	non-coding (NR_152255, exon 1 of 2)	233	NR_152255	100504056	Mm.416837	NR_152255		Gm20036	-	predicted gene, 20036	ncRNA
chr6	144074945	144075242	+	764	NA	intron (NM_001113559, intron 3 of 13)	intron (NM_001113559, intron 3 of 13)	-127987	NM_001347506	20678	Mm.1752	NM_011444	ENSMUSG00000041540	Sox5	A730017D01Rik|AI528773	SRY (sex determining region Y)-box 5	protein-coding
chr12	104123778	104124158	+	572	NA	Intergenic	L1MB5|LINE|L1	-4028	NM_173024	271047	Mm.120265	NM_173024	ENSMUSG00000066364	Serpina3b	6A1|A030003A19Rik	serine (or cysteine) peptidase inhibitor, clade A, member 3B	protein-coding
chr7	35585854	35586762	+	984	NA	promoter-TSS (NM_178263)	promoter-TSS (NM_178263)	61	NM_178263	245886	Mm.272620	NM_145633	ENSMUSG00000034867	Ankrd27	AA408090|BC016493|D330003H11Rik|Varp	ankyrin repeat domain 27 (VPS9 domain)	protein-coding
chr4	117891981	117892200	+	555	NA	promoter-TSS (NM_026344)	promoter-TSS (NM_026344)	-87	NM_026344	67728	Mm.13823	NM_026344	ENSMUSG00000028540	Dph2	9130020C19Rik|AI467389|Dph2l2	DPH2 homolog	protein-coding
chr17	7306495	7307076	+	866	NA	Intergenic	Intergenic	-17875	NM_011553	21461	Mm.264651	NM_011553	ENSMUSG00000071322	Tcp10a	D17Leh66A|D17Leh66aa|Gm10326|T66A-a|Tcp-10a	t-complex protein 10a	protein-coding
chr9	107950797	107951030	+	624	NA	promoter-TSS (NM_011634)	promoter-TSS (NM_011634)	-50	NM_011634	22036	Mm.297870	NM_011634	ENSMUSG00000032586	Traip	Trip	TRAF-interacting protein	protein-coding
chr11	69656615	69657112	+	650	NA	TTS (NM_009235)	TTS (NM_009235)	1826	NM_009235	20670	Mm.347499	NM_009235	ENSMUSG00000041287	Sox15	-	SRY (sex determining region Y)-box 15	protein-coding
chr5	143975368	143975888	+	701	NA	Intergenic	RMER1A|Other|Other	39225	NM_177682	231874	Mm.320432	NM_177682	ENSMUSG00000029617	Ccz1	AU022870	CCZ1 vacuolar protein trafficking and biogenesis associated	protein-coding
chr3	7366275	7366788	+	1000	NA	promoter-TSS (NM_008862)	promoter-TSS (NM_008862)	-73	NM_008862	18767	Mm.3193	NM_008862	ENSMUSG00000027499	Pkia	AI415001|PKIalpha	protein kinase inhibitor, alpha	protein-coding
chr4	155831167	155832182	+	625	NA	5' UTR (NM_025338, exon 1 of 4)	5' UTR (NM_025338, exon 1 of 4)	405	NM_025338	66077	Mm.28999	NM_025338	ENSMUSG00000065990	Aurkaip1	0610033H09Rik|Aip|Akip|MRP-S38	aurora kinase A interacting protein 1	protein-coding
chr9	22411304	22411805	+	1000	NA	promoter-TSS (NM_026739)	promoter-TSS (NM_026739)	43	NM_026739	68283	Mm.280669	NM_026739	ENSMUSG00000036411	9530077C05Rik	1110003N12Rik|mKIAA0895	RIKEN cDNA 9530077C05 gene	protein-coding
chr13	119487966	119488115	+	1000	NA	promoter-TSS (NM_001370626)	promoter-TSS (NM_001370626)	-46	NM_001039244	633640	Mm.46679	NM_001039244	ENSMUSG00000074634	Tmem267	EG633640|Gm7120	transmembrane protein 267	protein-coding
chr8	93426701	93427327	+	599	NA	Intergenic	Intergenic	-47237	NM_001370830	75704	Mm.480920	NM_001370830	ENSMUSG00000074156	Ces1h	2310039D24Rik	carboxylesterase 1H	protein-coding
chr5	111570761	111571216	+	848	NA	Intergenic	Intergenic	-10573	NR_015546	330164	Mm.193276	NM_177875	ENSMUSG00000052848	C130026L21Rik	-	RIKEN cDNA C130026L21 gene	ncRNA
chr12	116404893	116405654	+	1000	NA	promoter-TSS (NR_028421)	promoter-TSS (NR_028421)	-112	NR_028421	319545	Mm.390543	NR_028421	ENSMUSG00000112980	D430020J02Rik	-	RIKEN cDNA D430020J02 gene	ncRNA
chr5	111799555	111800322	+	594	NA	Intergenic	Intergenic	-38210	NR_045833	269683	Mm.136946	NM_207252	ENSMUSG00000085271	E130006D01Rik	Gm16018|Gm681	RIKEN cDNA E130006D01 gene	ncRNA
chr17	47368812	47369044	+	642	NA	promoter-TSS (NM_001146212)	promoter-TSS (NM_001146212)	41	NM_001146211	64657	Mm.216250	NM_183086	ENSMUSG00000034729	Mrps10	1110038B19Rik|AW743084|Rpms10	mitochondrial ribosomal protein S10	protein-coding
chr4	126058411	126058837	+	678	NA	promoter-TSS (NM_001356446)	promoter-TSS (NM_001356446)	59	NM_001356446	230751	Mm.38907	NM_172701	ENSMUSG00000042616	Oscp1	1810007P19Rik|5730415O04|6030436A01Rik	organic solute carrier partner 1	protein-coding
chr4	136163571	136163785	+	572	NA	Intergenic	Intergenic	-8596	NM_177733	242705	Mm.307932	NM_177733	ENSMUSG00000018983	E2f2	E2F-2	E2F transcription factor 2	protein-coding
chr7	56018975	56019812	+	845	NA	intron (NM_153578, intron 1 of 4)	CpG	207	NM_153578	233280	Mm.389901	NM_153578	ENSMUSG00000047037	Nipa1	1110027G09Rik|A830014A18Rik|FSP3|Spg6	non imprinted in Prader-Willi/Angelman syndrome 1 homolog (human)	protein-coding
chr15	79973872	79974049	+	779	NA	Intergenic	Intergenic	25066	NR_106072	102465699		NR_106072	ENSMUSG00000099222	Mir7213	Gm27377|mmu-mir-7213	microRNA 7213	ncRNA
chr10	22306508	22306920	+	606	NA	promoter-TSS (NR_015465)	promoter-TSS (NR_015465)	-68	NR_015465	606736	Mm.387042	NR_015465	ENSMUSG00000097352	C920009B18Rik	-	RIKEN cDNA C920009B18 gene	ncRNA
chr17	35673502	35673957	+	678	NA	promoter-TSS (NM_010364)	promoter-TSS (NM_010364)	14	NM_010364	14885	Mm.10182	NM_010364	ENSMUSG00000001524	Gtf2h4	AW545633|BTF2 p52|p52	general transcription factor II H, polypeptide 4	protein-coding
chr2	31917694	31917904	+	569	NA	intron (NM_011836, intron 12 of 27)	MIRc|SINE|MIR	30518	NM_011836	23928	Mm.69566	NM_011836	ENSMUSG00000026840	Lamc3	1110064A23Rik|AI562206|AW240805	laminin gamma 3	protein-coding
chr2	178788184	178788604	+	644	NA	Intergenic	Intergenic	357879	NM_001291189	381409	Mm.330860	NM_198656	ENSMUSG00000039155	Cdh26	Gm1010	cadherin-like 26	protein-coding
chr5	86227420	86227785	+	649	NA	Intergenic	Intergenic	-29701	NM_001310653	14715	Mm.26791	NM_010323	ENSMUSG00000029255	Gnrhr	-	gonadotropin releasing hormone receptor	protein-coding
chr12	84316676	84317539	+	786	NA	non-coding (NR_157102, exon 1 of 13)	non-coding (NR_157102, exon 1 of 13)	248	NM_001252583	52708	Mm.255150	NM_144833	ENSMUSG00000042472	Zfp410	Apa1|D12Ertd748e|Znf410	zinc finger protein 410	protein-coding
chr8	95702816	95703079	+	672	NA	promoter-TSS (NM_145602)	promoter-TSS (NM_145602)	-90	NM_001195006	234593	Mm.29846	NM_145602	ENSMUSG00000036564	Ndrg4	D8Bwg1337e|Ndr1-rs|Ndr4|R74996|SMAP-8	N-myc downstream regulated gene 4	protein-coding
chr10	18194858	18195179	+	778	NA	intron (NM_001370991, intron 3 of 21)	intron (NM_001370991, intron 3 of 21)	15809	NM_001195036	100045792	Mm.380617	NM_001195036	ENSMUSG00000071392	Ect2l	C330021H03Rik|Gm10331	epithelial cell transforming sequence 2 oncogene-like	protein-coding
chr17	25727290	25727841	+	669	NA	promoter-TSS (NM_145409)	promoter-TSS (NM_145409)	-150	NM_145409	214901	Mm.102540	NM_145409	ENSMUSG00000019214	Chtf18	6030457M03Rik|CTF18|Chl12	CTF18, chromosome transmission fidelity factor 18	protein-coding
chr4	146173560	146174095	+	717	NA	intron (NM_001177546, intron 2 of 4)	RMER17B2|LTR|ERVK	16137	NM_001177545	667666	Mm.459230	NM_001177545	ENSMUSG00000066007	Zfp600	Gm13164	zinc finger protein 600	protein-coding
chr16	38458681	38459093	+	541	NA	promoter-TSS (NM_009855)	promoter-TSS (NM_009855)	-46	NM_009855	12519	Mm.89474	NM_009855	ENSMUSG00000075122	Cd80	B71|Cd28l|Ly-53|Ly53|MIC17|TSA1	CD80 antigen	protein-coding
chr6	5509737	5510203	+	886	NA	Intergenic	Intergenic	-13692	NM_013743	27273	Mm.235547	NM_013743	ENSMUSG00000019577	Pdk4	AV005916	pyruvate dehydrogenase kinase, isoenzyme 4	protein-coding
chr1	37931833	37932185	+	689	NA	Intergenic	Intergenic	-15516	NM_001033427	332427	Mm.332981	NM_001033427	ENSMUSG00000061584	Lyg2	Gm776	lysozyme G-like 2	protein-coding
chr3	96629512	96630144	+	799	NA	promoter-TSS (NM_025875)	promoter-TSS (NM_025875)	-9	NR_003619	229613	Mm.445135	NM_175469	ENSMUSG00000045327	6330549D23Rik	-	RIKEN cDNA 6330549D23 gene	pseudo
chr4	22487512	22488100	+	625	NA	exon (NM_008899, exon 1 of 1)	exon (NM_008899, exon 1 of 1)	560	NM_008899	18992	Mm.129387	NM_008899	ENSMUSG00000095139	Pou3f2	9430075J19Rik|A230098E07Rik|Brn-2|Brn2|OTF-7|Otf7|oct-7	POU domain, class 3, transcription factor 2	protein-coding
chr3	102038482	102039339	+	645	NA	Intergenic	Intergenic	28765	NM_178777	18072	Mm.137286	NM_178777	ENSMUSG00000048540	Nhlh2	6230401I09Rik|Hen2|NSCL2|Nscl-2|bHLHa34	nescient helix loop helix 2	protein-coding
chr5	71700915	71701460	+	685	NA	intron (NM_001370968, intron 4 of 9)	CpG	1255	NM_008069	14400	Mm.38567	NM_008069	ENSMUSG00000029212	Gabrb1	AW061132|B230208N19Rik|Gabrb-1	gamma-aminobutyric acid (GABA) A receptor, subunit beta 1	protein-coding
chr10	79854115	79855289	+	1000	NA	non-coding (NR_029447, exon 1 of 1)	non-coding (NR_029447, exon 1 of 1)	269	NR_029447	414101	Mm.401339	NR_029447	ENSMUSG00000091994	E130317F20Rik	-	RIKEN cDNA E130317F20 gene	ncRNA
chr17	15023889	15025048	+	987	NA	Intergenic	(CCCCG)n|Simple_repeat|Simple_repeat	-14284	NM_198104	21647	Mm.440445	NM_011560	ENSMUSG00000079707	Tcte3	D17Leh117c|LC2|Tcte-3|Tctex-2|Tctex-4|Tctex2|Tctex4	t-complex-associated testis expressed 3	protein-coding
chr2	152652682	152653362	+	615	NA	non-coding (NR_156705, exon 2 of 2)	non-coding (NR_156705, exon 2 of 2)	1308	NR_156705	75662	Mm.396205	NR_156705	ENSMUSG00000087148	1700030C14Rik	-	RIKEN cDNA 1700030C14 gene	ncRNA
chr2	78024417	78024855	+	636	NA	Intergenic	MTE2a|LTR|ERVL-MaLR	-26541	NR_108098	78158	Mm.78473	NR_108098	ENSMUSG00000085431	4930440I19Rik	-	RIKEN cDNA 4930440I19 gene	ncRNA
chr3	64520897	64521300	+	570	NA	Intergenic	Intergenic	-13413	NM_001104618	667060	Mm.484957	NM_001104618	ENSMUSG00000068999	Vmn2r5	EG667060	vomeronasal 2, receptor 5	protein-coding
chr5	108660415	108661085	+	1000	NA	promoter-TSS (NM_001357029)	promoter-TSS (NM_001357029)	80	NM_001357029	110524	Mm.260921	NM_199011	ENSMUSG00000004815	Dgkq	110kDa|DAGK|DAGK7|Dagk4|Dgkd	diacylglycerol kinase, theta	protein-coding
chr11	59202138	59202783	+	683	NA	promoter-TSS (NM_001302336)	promoter-TSS (NM_001302336)	-26	NM_001302334	67212	Mm.282694	NM_026035	ENSMUSG00000036860	Mrpl55	2810038N09Rik|L55mt|MRP-L55	mitochondrial ribosomal protein L55	protein-coding
chr13	45389491	45390199	+	689	NA	5' UTR (NM_153789, exon 1 of 7)	5' UTR (NM_153789, exon 1 of 7)	103	NM_153789	218203	Mm.212855	NM_153789	ENSMUSG00000038175	Mylip	9430057C20Rik|Mir	myosin regulatory light chain interacting protein	protein-coding
chr4	151988494	151989122	+	585	NA	TTS (NM_172705)	TTS (NM_172705)	178	NM_001145929	69876	Mm.226820	NM_175152	ENSMUSG00000039759	Thap3	2010013E08Rik|2210418H06Rik	THAP domain containing, apoptosis associated protein 3	protein-coding
chr1	6441001	6441649	+	607	NA	Intergenic	CpG	-45906	NM_001244693	240690	Mm.234612	NM_173868	ENSMUSG00000033740	St18	AV348974|Myt3|NZF-3|Nzf3|mKIAA0535	suppression of tumorigenicity 18	protein-coding
chr9	98563159	98564128	+	1000	NA	promoter-TSS (NM_015827)	promoter-TSS (NM_015827)	-32	NR_029444	75881	Mm.483402	NM_175227	ENSMUSG00000051074	4930579K19Rik	-	RIKEN cDNA 4930579K19 gene	ncRNA
chr12	54272091	54272550	+	590	NA	Intergenic	Intergenic	38705	NR_108033	73592	Mm.416874	NR_108033	ENSMUSG00000112821	1700104L18Rik	-	RIKEN cDNA 1700104L18 gene	ncRNA
chr10	125389274	125389810	+	826	NA	Intergenic	Intergenic	-60579	NM_011391	20503	Mm.29161	NM_011391	ENSMUSG00000020102	Slc16a7	4921534N07Rik|9030411M13Rik|D630004K10Rik|Mct2	solute carrier family 16 (monocarboxylic acid transporters), member 7	protein-coding
chr2	144279810	144280103	+	546	NA	3' UTR (NM_028984, exon 5 of 5)	3' UTR (NM_028984, exon 5 of 5)	9052	NM_028984	74528	Mm.386817	NM_028984	ENSMUSG00000027424	Mgme1	8430406I07Rik|AI426476	mitochondrial genome maintenance exonuclease 1	protein-coding
chr17	6079347	6080159	+	1000	NA	promoter-TSS (NM_001111017)	promoter-TSS (NM_001111017)	-14	NM_177311	321007	Mm.5548	NM_177311	ENSMUSG00000015659	Serac1	4930511N22Rik|D17Ertd141e	serine active site containing 1	protein-coding
chr14	66909850	66910348	+	624	NA	Intergenic	CpG	-1109	NM_175498	239157	Mm.44358	NM_175498	ENSMUSG00000046204	Pnma2	A830049P17Rik|mKIAA0883	paraneoplastic antigen MA2	protein-coding
chr12	78861412	78862331	+	1000	NA	promoter-TSS (NM_023721)	promoter-TSS (NM_023721)	-201	NM_026114	13665	Mm.196220	NM_026114	ENSMUSG00000021116	Eif2s1	0910001O23Rik|2410026C18Rik|35kDa|Eif2a|eIF2alpha	eukaryotic translation initiation factor 2, subunit 1 alpha	protein-coding
chr2	164355679	164356809	+	656	NA	exon (NM_011414, exon 1 of 4)	exon (NM_011414, exon 1 of 4)	263	NM_011414	20568	Mm.371583	NM_011414	ENSMUSG00000017002	Slpi	ALP	secretory leukocyte peptidase inhibitor	protein-coding
chr5	128579174	128579817	+	854	NA	intron (NR_015517, intron 5 of 5)	intron (NR_015517, intron 5 of 5)	21192	NR_015517	319616	Mm.387738	NR_015517	ENSMUSG00000072591	Fzd10os	5930412G12Rik|Fzd10as	frizzled class receptor 10, opposite strand	ncRNA
chr15	40655306	40656203	+	565	NA	intron (NM_001356998, intron 1 of 6)	CpG	712	NM_001356998	22762	Mm.39496	NM_011766	ENSMUSG00000022306	Zfpm2	B330005D23Rik|FOG-2|FOG2	zinc finger protein, multitype 2	protein-coding
chr9	107541597	107542536	+	789	NA	promoter-TSS (NM_019720)	promoter-TSS (NM_019720)	127	NM_001357290	56368	Mm.24833	NM_019720	ENSMUSG00000037190	Cyb561d2	AW049681|Tsp10	cytochrome b-561 domain containing 2	protein-coding
chr15	79932288	79932891	+	643	NA	promoter-TSS (NM_144811)	promoter-TSS (NM_144811)	57	NM_144811	52609	Mm.323442	NM_144811	ENSMUSG00000053411	Cbx7	1600014J01Rik|AI851678|D15Ertd417e	chromobox 7	protein-coding
chr6	51401297	51401769	+	558	NA	Intergenic	Intergenic	21823	NR_110455	625167	Mm.389772	NR_110455	ENSMUSG00000107660	Gm6559	EG625167	predicted gene 6559	ncRNA
chr9	62121892	62123168	+	1000	NA	promoter-TSS (NR_039595)	promoter-TSS (NR_039595)	64	NR_039595	100628602		NR_039595	ENSMUSG00000092696	Mir5133	mir-5133|mmu-mir-5133|mu-mir-5133	microRNA 5133	ncRNA
chrX	7898845	7899843	+	713	NA	promoter-TSS (NM_001252529)	promoter-TSS (NM_001252529)	8	NM_011591	21855	Mm.27393	NM_011591	ENSMUSG00000031158	Timm17b	17kDa|Sfc3|mTim17b	translocase of inner mitochondrial membrane 17b	protein-coding
chr15	12833491	12833836	+	542	NA	intron (NM_026799, intron 3 of 34)	intron (NM_026799, intron 3 of 34)	8848	NM_026799	14000	Mm.293142	NM_026799	ENSMUSG00000022191	Drosha	1110013A17Rik|AI874853|Etohi2|Rn3|Rnasen	drosha, ribonuclease type III	protein-coding
chr9	58554813	58555748	+	738	NA	Intergenic	CpG	-14340	NM_133983	102657	Mm.5356	NM_133983	ENSMUSG00000035914	Cd276	6030411F23Rik|AU016588|B7RP-2|B7h3	CD276 antigen	protein-coding
chr5	52191112	52191445	+	683	NA	promoter-TSS (NM_001042620)	promoter-TSS (NM_001042620)	597	NR_015537	414108	Mm.383512	NR_015537	ENSMUSG00000097145	9230114K14Rik	-	RIKEN cDNA 9230114K14 gene	ncRNA
chr6	13871364	13871848	+	1000	NA	promoter-TSS (NM_001352887)	promoter-TSS (NM_001352887)	37	NR_045995	76311	Mm.367129	NR_045995	ENSMUSG00000097616	1110019D14Rik	-	RIKEN cDNA 1110019D14 gene	ncRNA
chr1	74601044	74601857	+	696	NA	promoter-TSS (NM_021313)	promoter-TSS (NM_021313)	-5	NM_175031	269209	Mm.310974	NM_175031	ENSMUSG00000033276	Stk36	1700112N14Rik|B930045J24|FU|Fused|mKIAA1278	serine/threonine kinase 36	protein-coding
chr15	23036266	23036517	+	781	NA	promoter-TSS (NM_001081299)	promoter-TSS (NM_001081299)	-72	NM_001081299	320865	Mm.241965	NM_001081299	ENSMUSG00000040420	Cdh18	B230220E17Rik|Cdh14l|Tg(GFAP-APOE_i4)1Hol	cadherin 18	protein-coding
chr2	30205328	30206331	+	759	NA	promoter-TSS (NM_001356475)	promoter-TSS (NM_001356475)	18	NM_001356475	70266	Mm.216089	NM_172404	ENSMUSG00000039648	Kyat1	2010009K05Rik|AI182306|Ccbl1|Gtk|Kat1|KatI	kynurenine aminotransferase 1	protein-coding
chr7	46795574	46796442	+	924	NA	promoter-TSS (NM_008186)	promoter-TSS (NM_008186)	-86	NM_001360076	14884	Mm.22700	NM_008186	ENSMUSG00000006599	Gtf2h1	62kDa|AW743425|AW822074|BTF2 p62|C77871|p62	general transcription factor II H, polypeptide 1	protein-coding
chr3	40540664	40541087	+	755	NA	exon (NM_175515, exon 1 of 16)	exon (NM_175515, exon 1 of 16)	108	NM_175515	380614	Mm.105309	NM_175515	ENSMUSG00000060798	Intu	9230116I04Rik|9430087H23Rik|Pdzd6|Pdzk6|mKIAA1284	inturned planar cell polarity protein	protein-coding
chr9	65141345	65141929	+	568	NA	intron (NM_008988, intron 1 of 13)	CpG	483	NM_001357257	19289	Mm.41529	NM_008988	ENSMUSG00000032394	Igdcc3	2810401C09Rik|AI851425|Punc|WI-14920	immunoglobulin superfamily, DCC subclass, member 3	protein-coding
chr9	7659436	7659889	+	669	NA	intron (NM_013903, intron 8 of 9)	B4|SINE|B4	31431	NM_013903	30800	Mm.390121	NM_013903	ENSMUSG00000018620	Mmp20	-	matrix metallopeptidase 20 (enamelysin)	protein-coding
chr4	132353384	132353833	+	667	NA	promoter-TSS (NR_003270)	promoter-TSS (NR_003270)	78	NR_003270	399101	Mm.486919	NR_002904	ENSMUSG00000085241	Snhg3	Rnu17d|U17HG	small nucleolar RNA host gene 3	ncRNA
chr2	22227028	22227713	+	550	NA	promoter-TSS (NM_148413)	promoter-TSS (NM_148413)	-133	NM_148413	667663	Mm.330033	NM_148413	ENSMUSG00000025716	Myo3a	9030416P08Rik	myosin IIIA	protein-coding
chr10	39731079	39732952	+	1000	NA	promoter-TSS (NM_011264)	promoter-TSS (NM_011264)	-8	NR_038037	327744	Mm.295265	NM_183198	ENSMUSG00000087177	E130307A14Rik	-	RIKEN cDNA E130307A14 gene	ncRNA
chr17	56183826	56184122	+	723	NA	promoter-TSS (NM_080837)	promoter-TSS (NM_080837)	-54	NM_080837	28106	Mm.294870	NM_080837	ENSMUSG00000019579	Mydgf	D17Wsu104e|Il25|Ly6elg	myeloid derived growth factor	protein-coding
chr12	3981202	3981850	+	739	NA	intron (NM_001082483, intron 10 of 22)	intron (NM_001082483, intron 10 of 22)	26581	NM_008895	18976	Mm.277996	NM_008895	ENSMUSG00000020660	Pomc	ACTH|BE|Beta-LPH|Clip|Gamma-LPH|Npp|Pomc-1|Pomc1|alpha-MSH|alphaMSH|beta-MSH|gamma-MSH	pro-opiomelanocortin-alpha	protein-coding
chr9	118489554	118490152	+	685	NA	Intergenic	Intergenic	11664	NM_010136	13813	Mm.200692	NM_010136	ENSMUSG00000032446	Eomes	C77258|TBR-2|Tbr2	eomesodermin	protein-coding
chr6	35323162	35323453	+	740	NA	intron (NM_173375, intron 1 of 2)	intron (NM_173375, intron 1 of 2)	2834	NM_173375	208164	Mm.257766	NM_173375	ENSMUSG00000047420	Fam180a	B230314O19	family with sequence similarity 180, member A	protein-coding
chr2	31688044	31688838	+	1000	NA	promoter-TSS (NM_001112703)	promoter-TSS (NM_001112703)	28	NR_153862	108168742	Mm.416860	NR_153862		Gm13427	-	predicted gene 13427	ncRNA
chr9	111438946	111439491	+	602	NA	5' UTR (NM_172928, exon 1 of 5)	5' UTR (NM_172928, exon 1 of 5)	137	NM_172928	245038	Mm.26361	NM_172928	ENSMUSG00000032500	Dclk3	BC056929|C730036H08|Dcamkl3	doublecortin-like kinase 3	protein-coding
chr7	45339375	45339791	+	568	NA	TTS (NM_010473)	TTS (NM_010473)	4314	NM_010473	15464	Mm.39968	NM_010473	ENSMUSG00000038239	Hrc	-	histidine rich calcium binding protein	protein-coding
chr8	3556200	3556451	+	545	NA	Intergenic	(TG)n|Simple_repeat|Simple_repeat	-11673	NM_001024728	546049	Mm.358733	NM_001024728	ENSMUSG00000065952	C330021F23Rik	2610027C06Rik|Rps23r1|Rps23rg1	RIKEN cDNA C330021F23 gene	protein-coding
chr12	69241546	69242229	+	611	NA	promoter-TSS (NM_178253)	promoter-TSS (NM_178253)	55	NM_178253	271005	Mm.180969	NM_178253	ENSMUSG00000051890	Klhdc1	-	kelch domain containing 1	protein-coding
chr4	63558423	63558902	+	683	NA	promoter-TSS (NM_001356355)	promoter-TSS (NM_001356355)	-101	NM_001356354	230279	Mm.41523	NM_144905	ENSMUSG00000045917	Tmem268	6330416G13Rik|AW492431|bM230C2.2	transmembrane protein 268	protein-coding
chr11	80089289	80089806	+	621	NA	5' UTR (NM_001029856, exon 1 of 23)	5' UTR (NM_001029856, exon 1 of 23)	147	NM_001029856	237877	Mm.89551	NM_001029856	ENSMUSG00000017550	Atad5	C130052G03Rik|FRAG1|Gm17	ATPase family, AAA domain containing 5	protein-coding
chr2	60283875	60284259	+	641	NA	exon (NM_025422, exon 1 of 5)	exon (NM_025422, exon 1 of 5)	417	NM_025422	66205	Mm.227281	NM_025422	ENSMUSG00000060703	Cd302	1110055L24Rik|AI159627	CD302 antigen	protein-coding
chr5	124006833	124007574	+	686	NA	intron (NM_177876, intron 3 of 3)	intron (NM_177876, intron 3 of 3)	10351	NR_105999	102465625		NR_105999	ENSMUSG00000098454	Mir7032	Gm27309|mmu-mir-7032	microRNA 7032	ncRNA
chr2	74711925	74712459	+	808	NA	5' UTR (NM_010468, exon 1 of 3)	5' UTR (NM_010468, exon 1 of 3)	199	NM_010468	15434	Mm.430708	NM_010468	ENSMUSG00000079277	Hoxd3	Hox-4.1|Hox-5.5	homeobox D3	protein-coding
chr1	133363310	133364131	+	650	NA	5' UTR (NM_175443, exon 1 of 8)	5' UTR (NM_175443, exon 1 of 8)	148	NM_175443	214253	Mm.52111	NM_175443	ENSMUSG00000070644	Etnk2	4933417N20Rik|AI197444|EKI 2|Eki2|Tuc1	ethanolamine kinase 2	protein-coding
chr6	121272003	121272810	+	763	NA	Intergenic	ORR1D1|LTR|ERVL-MaLR	26500	NM_011909	24110	Mm.326911	NM_011909	ENSMUSG00000030107	Usp18	1110058H21Rik|AW047653|UBP43|Ubp15	ubiquitin specific peptidase 18	protein-coding
chr4	44300759	44300998	+	651	NA	promoter-TSS (NM_010790)	promoter-TSS (NM_010790)	-39	NM_010790	17279	Mm.268668	NM_010790	ENSMUSG00000035683	Melk	AI327312|MPK38|mKIAA0175	maternal embryonic leucine zipper kinase	protein-coding
chr13	55471449	55472958	+	561	NA	exon (NM_001030296, exon 2 of 3)	exon (NM_001030296, exon 2 of 3)	5573	NR_105909	102465569		NR_105909	ENSMUSG00000098341	Mir6944	Gm27710|mmu-mir-6944	microRNA 6944	ncRNA
chr10	80320452	80320692	+	727	NA	promoter-TSS (NM_025521)	promoter-TSS (NM_025521)	-24	NM_025521	66374	Mm.383824	NM_025521	ENSMUSG00000020133	2310011J03Rik	AI452186|AW545358	RIKEN cDNA 2310011J03 gene	protein-coding
chr2	26640146	26640441	+	570	NA	promoter-TSS (NR_024068)	promoter-TSS (NR_024068)	-49	NR_024068	72091	Mm.27103	NR_024068		Snhg7	2610002F03Rik|AI427062	small nucleolar RNA host gene 7	ncRNA
chr7	120722775	120723070	+	753	NA	intron (NM_001164580, intron 1 of 2)	intron (NM_001164580, intron 1 of 2)	-16635	NM_177697	233813	Mm.389939	NM_177697	ENSMUSG00000030889	Vwa3a	E030013G06Rik	von Willebrand factor A domain containing 3A	protein-coding
chr5	39510273	39510619	+	629	NA	intron (NR_045416, intron 2 of 5)	intron (NR_045416, intron 2 of 5)	93128	NR_045416	75095	Mm.332354	NR_045416	ENSMUSG00000106741	4930513D17Rik	-	RIKEN cDNA 4930513D17 gene	ncRNA
chr4	127125862	127126318	+	785	NA	promoter-TSS (NM_001099319)	promoter-TSS (NM_001099319)	47	NM_001099319	100039968	Mm.392655	NM_001099319	ENSMUSG00000070737	Tmem35b	Gm12942|Zmym6nb	transmembrane protein 35B	protein-coding
chr9	57130594	57131539	+	853	NA	non-coding (NR_102289, exon 1 of 2)	non-coding (NR_102289, exon 1 of 2)	224	NR_102289	76794	Mm.472839	NR_102289	ENSMUSG00000086728	Man2c1os	2410133F24Rik|AI851351	mannosidase, alpha, class 2C, member 1, opposite strand	ncRNA
chr5	91139435	91139899	+	765	NA	promoter-TSS (NM_009704)	promoter-TSS (NM_009704)	68	NM_009704	11839	Mm.8039	NM_009704	ENSMUSG00000029378	Areg	AR|Mcub|Sdgf	amphiregulin	protein-coding
chr6	92779377	92779962	+	583	NA	intron (NM_175314, intron 38 of 39)	(TG)n|Simple_repeat|Simple_repeat	-73485	NM_001081146	243548	Mm.248820	NM_001081146	ENSMUSG00000030020	Prickle2	6230400G14Rik|6720451F06Rik|mpk2	prickle planar cell polarity protein 2	protein-coding
chr5	121204355	121205065	+	705	NA	intron (NM_011290, intron 1 of 6)	CpG	209	NM_011290	19988	Mm.262021	NM_011290	ENSMUSG00000029614	Rpl6	Taxreb107	ribosomal protein L6	protein-coding
chr7	129256524	129257272	+	621	NA	promoter-TSS (NM_001080963)	promoter-TSS (NM_001080963)	-196	NM_001080963	381925	Mm.39184	NM_001080963	ENSMUSG00000070366	Plpp4	C030048B12Rik|Gm1090|Ppapdc1a	phospholipid phosphatase 4	protein-coding
chr2	177803122	177803632	+	583	NA	Intergenic	Intergenic	36959	NM_001024849	329575	Mm.425123	NM_001024849	ENSMUSG00000095362	Gm14325	-	predicted gene 14325	protein-coding
chr15	83594848	83595297	+	733	NA	promoter-TSS (NM_183017)	promoter-TSS (NM_183017)	85	NM_183017	223723	Mm.46778	NM_183017	ENSMUSG00000016757	Ttll12	BC055368|D430005B17	tubulin tyrosine ligase-like family, member 12	protein-coding
chr17	57202323	57202751	+	687	NA	Intergenic	Intergenic	-8356	NM_019418	50930	Mm.483369	NM_019418	ENSMUSG00000005824	Tnfsf14	HVEM-L|HVEML|LIGHT|LTg|Ly113|Tnlg1d	tumor necrosis factor (ligand) superfamily, member 14	protein-coding
chr4	57904664	57904889	+	580	NA	Intergenic	RMER17C|LTR|ERVK	11488	NM_178727	242484	Mm.23214	NM_178727	ENSMUSG00000052117	D630039A03Rik	-	RIKEN cDNA D630039A03 gene	protein-coding
chr7	99535180	99535758	+	811	NA	promoter-TSS (NM_177231)	promoter-TSS (NM_177231)	-17	NM_177231	109689	Mm.260193	NM_177231	ENSMUSG00000018909	Arrb1	1200006I17Rik|AW208571|G430100A01Rik	arrestin, beta 1	protein-coding
chr7	66689223	66690363	+	1000	NA	promoter-TSS (NR_034030)	promoter-TSS (NR_034030)	-96	NR_034030	72635	Mm.289796	NM_152815	ENSMUSG00000053091	Lins1	2700083B01Rik|AW547219|Lins|Lins2|Wins2	lines homolog 1	protein-coding
chr9	44721231	44721572	+	548	NA	intron (NM_153537, intron 4 of 21)	CpG	13797	NM_153537	102693	Mm.28639	NM_153537	ENSMUSG00000048537	Phldb1	AU041016|D330037A14Rik|Ll5a	pleckstrin homology like domain, family B, member 1	protein-coding
chr15	58872526	58873233	+	667	NA	exon (NM_026642, exon 1 of 1)	exon (NM_026642, exon 1 of 1)	230	NM_026642	68260	Mm.278805	NM_026642	ENSMUSG00000037085	Trmt12	4632406N01Rik|AI449275|Tyw2	tRNA methyltranferase 12	protein-coding
chr11	100712079	100712578	+	918	NA	exon (NM_020004, exon 1 of 18)	exon (NM_020004, exon 1 of 18)	139	NM_001038010	14534	Mm.218837	NM_020004	ENSMUSG00000020918	Kat2a	1110051E14Rik|AW212720|Gcn5|Gcn5l2|mmGCN5	K(lysine) acetyltransferase 2A	protein-coding
chr9	96752395	96753225	+	752	NA	promoter-TSS (NR_015511)	promoter-TSS (NR_015511)	21	NR_015511	319859	Mm.259909	NM_177020		E030011O05Rik	-	RIKEN cDNA E030011O05 gene	ncRNA
chr18	34651263	34652115	+	714	NA	promoter-TSS (NM_178347)	promoter-TSS (NM_178347)	47	NM_178347	52563	Mm.196638	NM_178347	ENSMUSG00000024370	Cdc23	6030435O18|D18Ertd243e	CDC23 cell division cycle 23	protein-coding
chr11	96861629	96862250	+	894	NA	TTS (NM_019877)	TTS (NM_019877)	11546	NR_029562	387170		NR_029562	ENSMUSG00000065515	Mir152	Mirn152|mir-152|mmu-mir-152	microRNA 152	ncRNA
chr7	30588490	30589727	+	1000	NA	promoter-TSS (NR_106134)	promoter-TSS (NR_106134)	-272	NR_106134	102465774		NR_106134	ENSMUSG00000098553	Mir3569	Gm27279|mmu-mir-3569	microRNA 3569	ncRNA
chr7	119793626	119794538	+	977	NA	promoter-TSS (NM_001355104)	promoter-TSS (NM_001355104)	-24	NM_001355104	71151	Mm.274160	NM_027698	ENSMUSG00000030929	Eri2	4933424N09Rik|Exod1|mKIAA1504	exoribonuclease 2	protein-coding
chr5	138279905	138280498	+	1000	NA	promoter-TSS (NM_172412)	promoter-TSS (NM_172412)	-264	NM_172412	71951	Mm.77066	NM_172412	ENSMUSG00000029510	Gpc2	2410016G05Rik	glypican 2 (cerebroglycan)	protein-coding
chr9	83061343	83061644	+	605	NA	Intergenic	Intergenic	85114	NM_026122	94353	Mm.244426	NM_026122	ENSMUSG00000066456	Hmgn3	1110002A15Rik|6330514M13Rik|BB071015|TRIP7	high mobility group nucleosomal binding domain 3	protein-coding
chr6	143640636	143640997	+	578	NA	intron (NR_045732, intron 1 of 4)	intron (NR_045732, intron 1 of 4)	10472	NR_045732	73425	Mm.417844	NR_045732	ENSMUSG00000086887	1700060C16Rik	-	RIKEN cDNA 1700060C16 gene	ncRNA
chr15	79833967	79834448	+	624	NA	exon (NM_028763, exon 1 of 5)	exon (NM_028763, exon 1 of 5)	126	NM_028763	494448	Mm.38438	NM_028763	ENSMUSG00000089715	Cbx6	-	chromobox 6	protein-coding
chr9	20830834	20831284	+	632	NA	Intergenic	Intergenic	12565	NM_001030290	235033	Mm.297661	NM_001030290	ENSMUSG00000053773	Rdh8	Gm182|prRDH	retinol dehydrogenase 8	protein-coding
chr17	32829820	32830414	+	682	NA	5' UTR (NM_001293229, exon 1 of 3)	5' UTR (NM_001293229, exon 1 of 3)	144	NM_001360479	240064	Mm.476307	NM_177359	ENSMUSG00000095253	Zfp799	6030490I01Rik	zinc finger protein 799	protein-coding
chr9	37384258	37384851	+	620	NA	exon (NM_175189, exon 7 of 7)	exon (NM_175189, exon 7 of 7)	16948	NM_175189	72927	Mm.266133	NM_175189	ENSMUSG00000046240	Hepacam	2900042E01Rik|Glialcam|Hepn1	hepatocyte cell adhesion molecule	protein-coding
chr12	84361535	84362196	+	918	NA	promoter-TSS (NM_172581)	promoter-TSS (NM_172581)	-37	NM_172581	217705	Mm.259468	NM_172581	ENSMUSG00000021234	Fam161b	9330169D17|9830169C18Rik	family with sequence similarity 161, member B	protein-coding
chr11	120624804	120625113	+	549	NA	promoter-TSS (NR_105901)	promoter-TSS (NR_105901)	56	NM_153056	209011	Mm.292957	NM_153056	ENSMUSG00000025138	Sirt7	-	sirtuin 7	protein-coding
chr2	154549389	154550073	+	589	NA	exon (NM_029305, exon 3 of 3)	exon (NM_029305, exon 3 of 3)	827	NM_029305	75480	Mm.440434	NM_029305	ENSMUSG00000038523	1700003F12Rik	-	RIKEN cDNA 1700003F12 gene	protein-coding
chr4	141444504	141445162	+	629	NA	intron (NM_009541, intron 1 of 15)	CpG	160	NM_009541	22642	Mm.389590	NM_009541	ENSMUSG00000006215	Zbtb17	AA589413|Lp-1|Miz1|Zfp100|mZ13	zinc finger and BTB domain containing 17	protein-coding
chr1	172242374	172242808	+	879	NA	intron (NM_013734, intron 11 of 22)	intron (NM_013734, intron 11 of 22)	15833	NM_013734	27222	Mm.482392	NM_013734	ENSMUSG00000007107	Atp1a4	-	ATPase, Na+/K+ transporting, alpha 4 polypeptide	protein-coding
chr17	47694514	47695487	+	1000	NA	promoter-TSS (NM_001290337)	promoter-TSS (NM_001290337)	-207	NM_144939	107971	Mm.392206	NM_144939	ENSMUSG00000023266	Frs3	4930417B13Rik|AI449674|Frs2beta|Snt2	fibroblast growth factor receptor substrate 3	protein-coding
chrX	72917988	72918621	+	697	NA	promoter-TSS (NM_019405)	promoter-TSS (NM_019405)	40	NM_019405	26370	Mm.24643	NM_019405	ENSMUSG00000031347	Cetn2	1110034A02Rik|AI326150|Calt|caltractin	centrin 2	protein-coding
chr11	16950983	16951638	+	1000	NA	promoter-TSS (NM_176982)	promoter-TSS (NM_176982)	-28	NR_110424	72735	Mm.268598	NR_015469		Eldr	2810442I21Rik|4930500E12Rik|Fabl	Egfr long non-coding downstream RNA	ncRNA
chr15	79298383	79298879	+	786	NA	intron (NM_001199024, intron 10 of 15)	intron (NM_001199024, intron 10 of 15)	-13122	NM_177580	207495	Mm.309647	NM_177580	ENSMUSG00000018126	Baiap2l2	BC048937	BAI1-associated protein 2-like 2	protein-coding
chr1	6382747	6383191	+	630	NA	intron (NM_001195732, intron 1 of 4)	CpG	23638	NM_001195732	620393	Mm.388992	NM_001195732	ENSMUSG00000087247	Alkal1	EG620393|Fam150a	ALK and LTK ligand 1	protein-coding
chr10	116848786	116849804	+	1000	NA	intron (NM_001033333, intron 3 of 24)	intron (NM_001033333, intron 3 of 24)	47584	NM_001033333	237558	Mm.336386	NM_001033333	ENSMUSG00000034057	Myrfl	Gm239	myelin regulatory factor-like	protein-coding
chr7	100005873	100006440	+	671	NA	promoter-TSS (NM_133709)	promoter-TSS (NM_133709)	-248	NM_133709	69121	Mm.285295	NM_133709	ENSMUSG00000030732	Chrdl2	1810022C01Rik|Chl2	chordin-like 2	protein-coding
chr5	75067146	75067475	+	593	NA	Intergenic	Intergenic	-8291	NM_133256	14843	Mm.218752	NM_133256	ENSMUSG00000035946	Gsx2	Gsh-2|Gsh2	GS homeobox 2	protein-coding
chr13	98354962	98355787	+	771	NA	exon (NM_008242, exon 1 of 1)	exon (NM_008242, exon 1 of 1)	1129	NM_008242	15229	Mm.347441	NM_008242	ENSMUSG00000078302	Foxd1	AI385632|BF-2|FREAC4|Hfh10|Hfhbf2	forkhead box D1	protein-coding
chr13	75943179	75944046	+	549	NA	5' UTR (NM_028493, exon 1 of 12)	5' UTR (NM_028493, exon 1 of 12)	212	NM_028493	73296	Mm.276200	NM_028493	ENSMUSG00000021589	Rhobtb3	1700040C17Rik|2610033K01Rik|4930503C18Rik|AI317148|AW208826|mKIAA0878	Rho-related BTB domain containing 3	protein-coding
chr9	119937389	119937890	+	711	NA	promoter-TSS (NM_028976)	promoter-TSS (NM_028976)	33	NM_028735	74052	Mm.189573	NM_028735	ENSMUSG00000032514	Ttc21a	4921538N17Rik|AA387572|Thm2	tetratricopeptide repeat domain 21A	protein-coding
chr12	111166005	111166591	+	610	NA	promoter-TSS (NM_001286122)	promoter-TSS (NM_001286122)	-72	NM_001286122	22031	Mm.27431	NM_011632	ENSMUSG00000021277	Traf3	AI528849|CAP-1|CD40bp|CRAF1|LAP1|T-BAM|TRAFAMN|amn	TNF receptor-associated factor 3	protein-coding
chr1	191574905	191576216	+	1000	NA	promoter-TSS (NM_001305233)	promoter-TSS (NM_001305233)	-16	NM_029766	76843	Mm.189102	NM_029766	ENSMUSG00000037474	Dtl	2810047L02Rik|5730564G15Rik|L2dtl|Ramp	denticleless E3 ubiquitin protein ligase	protein-coding
chr5	102381312	102382105	+	551	NA	Intergenic	RMER1C|Other|Other	-99683	NM_029270	231532	Mm.440191	NM_029270	ENSMUSG00000057315	Arhgap24	0610025G21Rik	Rho GTPase activating protein 24	protein-coding
chr11	80377672	80378118	+	883	NA	exon (NM_027472, exon 1 of 10)	exon (NM_027472, exon 1 of 10)	120	NM_027472	70591	Mm.86860	NM_027472	ENSMUSG00000057181	5730455P16Rik	-	RIKEN cDNA 5730455P16 gene	protein-coding
chr4	140808998	140809365	+	694	NA	intron (NM_011060, intron 1 of 15)	intron (NM_011060, intron 1 of 15)	1467	NM_011060	18601	Mm.20851	NM_011060	ENSMUSG00000025328	Padi3	AI507004|Pad3|Pdi3|mKIAA4171	peptidyl arginine deiminase, type III	protein-coding
chr4	34729977	34730361	+	587	NA	promoter-TSS (NM_027041)	promoter-TSS (NM_027041)	37	NM_001347062	69329	Mm.389548	NM_027041	ENSMUSG00000028294	Cfap206	1700003M02Rik|AU024269	cilia and flagella associated protein 206	protein-coding
chr7	114817616	114817841	+	724	NA	intron (NM_173767, intron 7 of 12)	intron (NM_173767, intron 7 of 12)	71962	NM_173767	233752	Mm.83037	NM_173767	ENSMUSG00000048782	Insc	3830422K02Rik|C730020D23	INSC spindle orientation adaptor protein	protein-coding
chr4	134923372	134924681	+	973	NA	exon (NM_023665, exon 2 of 5)	exon (NM_023665, exon 2 of 5)	401	NM_023665	27981	Mm.331964	NM_023665	ENSMUSG00000037266	Rsrp1	2700043I21Rik|D4Ucla2|D4Wsu53e	arginine/serine rich protein 1	protein-coding
chr15	89429265	89430294	+	1000	NA	non-coding (NR_037154, exon 1 of 11)	non-coding (NR_037154, exon 1 of 11)	148	NR_004843	100134861	Mm.227738	NR_004843	ENSMUSG00000116461	Gm44502	BC090627|Chkb-Cpt1b|ChkbCpt1b|Chkbcpt1b	predicted readthrough transcript (NMD candidate), 44502	ncRNA
chr2	36214064	36214336	+	670	NA	Intergenic	Intergenic	-16226	NM_008969	19224	Mm.275434	NM_008969	ENSMUSG00000047250	Ptgs1	COX1|Cox-1|Cox-3|PGHS-1|PHS 1|Pghs1	prostaglandin-endoperoxide synthase 1	protein-coding
chr5	90903600	90904306	+	643	NA	promoter-TSS (NM_009140)	promoter-TSS (NM_009140)	54	NM_009140	20310	Mm.4979	NM_009140	ENSMUSG00000058427	Cxcl2	CINC-2a|GROb|Gro2|MIP-2|MIP-2a|Mgsa-b|Mip2|Scyb|Scyb2	chemokine (C-X-C motif) ligand 2	protein-coding
chr12	108309804	108310237	+	581	NA	intron (NM_001044380, intron 1 of 8)	intron (NM_001044380, intron 1 of 8)	3750	NM_001044380	214305	Mm.36423	NM_001044380	ENSMUSG00000021260	Hhipl1	1600002O04Rik|AK129450|mKIAA1822	hedgehog interacting protein-like 1	protein-coding
chr17	6913888	6914384	+	634	NA	intron (NM_001083945, intron 2 of 7)	intron (NM_001083945, intron 2 of 7)	18196	NR_152131	73617	Mm.352925	NR_152131	ENSMUSG00000099735	1700122H20Rik	Gm29205	RIKEN cDNA 1700122H20 gene	ncRNA
chr4	33188928	33189630	+	607	NA	exon (NM_001034867, exon 1 of 7)	exon (NM_001034867, exon 1 of 7)	458	NM_001034867	242377	Mm.372465	NM_001034867	ENSMUSG00000054659	Pm20d2	Acy1l2|Gm424	peptidase M20 domain containing 2	protein-coding
chr6	137455478	137456117	+	714	NA	intron (NM_001164402, intron 14 of 15)	intron (NM_001164402, intron 14 of 15)	45076	NM_001164403	19277	Mm.186361	NM_011216	ENSMUSG00000030223	Ptpro	D28|GLEPP1|PTPBK|PTPROt|PTPU2|PTPoc|PTPphi|Ptpn15|R-PTP-O	protein tyrosine phosphatase, receptor type, O	protein-coding
chr7	45896504	45897132	+	656	NA	promoter-TSS (NM_001291064)	promoter-TSS (NM_001291064)	-107	NM_021482	58867	Mm.214217	NM_021482	ENSMUSG00000040231	Syngr4	1700016O14Rik	synaptogyrin 4	protein-coding
chr15	60822866	60823584	+	687	NA	exon (NM_001162926, exon 2 of 2)	exon (NM_001162926, exon 2 of 2)	260	NR_030696	320469	Mm.230853	NM_177166		9930014A18Rik	-	RIKEN cDNA 9930014A18 gene	ncRNA
chr2	166370459	166371394	+	934	NA	Intergenic	Intergenic	-76525	NR_015558	319684	Mm.399746	NR_015558		5031425F14Rik	-	RIKEN cDNA 5031425F14 gene	ncRNA
chr4	54945006	54945336	+	677	NA	Intergenic	CpG	-2774	NM_172867	242466	Mm.102904	NM_172867	ENSMUSG00000060206	Zfp462	6030417H05|9430078C22Rik|Gt4-2|Zfpip|Znf462	zinc finger protein 462	protein-coding
chr19	46304292	46305764	+	863	NA	promoter-TSS (NM_019408)	promoter-TSS (NM_019408)	291	NM_001177369	18034	Mm.102365	NM_019408	ENSMUSG00000025225	Nfkb2	NF-kappaB2|lyt|p49|p49/p100|p50B|p52	nuclear factor of kappa light polypeptide gene enhancer in B cells 2, p49/p100	protein-coding
chr11	100198683	100199045	+	549	NA	Intergenic	Intergenic	-5618	NM_201255	107656	Mm.445335	NM_201255	ENSMUSG00000051617	Krt9	EPPK|K9|Krt1-9	keratin 9	protein-coding
chr19	45015516	45015904	+	549	NA	intron (NM_145503, intron 1 of 4)	CpG	500	NM_001130525	226154	Mm.28204	NM_145503	ENSMUSG00000035342	Lzts2	BC014695|LAPSER1|mKIAA1813	leucine zipper, putative tumor suppressor 2	protein-coding
chr1	37299596	37300410	+	858	NA	5' UTR (NM_030266, exon 1 of 26)	5' UTR (NM_030266, exon 1 of 26)	165	NM_001290797	269180	Mm.5294	NM_030266	ENSMUSG00000026113	Inpp4a	107kDa|9630012D15|D130048C09Rik|R74740	inositol polyphosphate-4-phosphatase, type I	protein-coding
chr11	94978987	94979327	+	657	NA	Intergenic	CpG	-2830	NM_009161	20391	Mm.18709	NM_009161	ENSMUSG00000001508	Sgca	50DAG|Asg	sarcoglycan, alpha (dystrophin-associated glycoprotein)	protein-coding
chr5	35739640	35740295	+	570	NA	promoter-TSS (NM_001359895)	promoter-TSS (NM_001359895)	20	NM_001359895	231147	Mm.290429	NM_194344	ENSMUSG00000036553	Sh3tc1	4631428G15|BC024909	SH3 domain and tetratricopeptide repeats 1	protein-coding
chr9	58708657	58709117	+	568	NA	intron (NM_028598, intron 2 of 5)	B4A|SINE|B4	32672	NM_028598	73673	Mm.205196	NM_028598	ENSMUSG00000074269	Rec114	2410076I21Rik|4930527A11Rik	REC114 meiotic recombination protein	protein-coding
chr2	25621419	25622155	+	753	NA	5' UTR (NM_001109993, exon 1 of 4)	5' UTR (NM_001109993, exon 1 of 4)	215	NM_001040130	51875	Mm.271147	NM_001040130	ENSMUSG00000026939	Tmem141	1110065P14Rik|AI663999|D2Ertd217e	transmembrane protein 141	protein-coding
chr10	80376242	80376431	+	548	NA	Intergenic	Intergenic	-6699	NR_038088	100568459		NR_038088	ENSMUSG00000115783	Bc1	Gm24367	brain cytoplasmic RNA 1	ncRNA
chr1	193035028	193036292	+	918	NA	5' UTR (NM_001301370, exon 1 of 9)	5' UTR (NM_001301370, exon 1 of 9)	115	NM_001301370	329324	Mm.76710	NM_181546	ENSMUSG00000016200	Syt14	B230320I09Rik|sytXIV	synaptotagmin XIV	protein-coding
chr3	89960435	89960821	+	736	NA	promoter-TSS (NM_001368650)	promoter-TSS (NM_001368650)	-31	NM_001368650	54667	Mm.30455	NM_001081182	ENSMUSG00000060671	Atp8b2	Id	ATPase, class I, type 8B, member 2	protein-coding
chr15	76701196	76701554	+	614	NA	promoter-TSS (NM_027122)	promoter-TSS (NM_027122)	-167	NM_027122	69572	Mm.34920	NM_027122	ENSMUSG00000019080	Mfsd3	2310010G13Rik	major facilitator superfamily domain containing 3	protein-coding
chr9	114562382	114563144	+	638	NA	exon (NM_001042503, exon 1 of 4)	exon (NM_001042503, exon 1 of 4)	1606	NM_001042503	636931	Mm.17857	NM_001042503	ENSMUSG00000079259	Trim71	2610206G21Rik|AL022943|Gm1127|Lin41|lin-41|mLin41|mlin-41	tripartite motif-containing 71	protein-coding
chr1	94469831	94470053	+	727	NA	Intergenic	Intergenic	-327500	NR_040473	74689	Mm.399187	NR_040473	ENSMUSG00000100518	4930440C22Rik	-	RIKEN cDNA 4930440C22 gene	ncRNA
chr3	68869468	68870215	+	565	NA	exon (NM_001167996, exon 1 of 1)	exon (NM_001167996, exon 1 of 1)	255	NM_001167996	68725	Mm.45741	NM_001167996	ENSMUSG00000046999	1110032F04Rik	AI115547	RIKEN cDNA 1110032F04 gene	protein-coding
chr8	22476379	22477268	+	1000	NA	promoter-TSS (NM_001146117)	promoter-TSS (NM_001146117)	56	NM_001146117	102032	Mm.378231	NM_001012667	ENSMUSG00000031534	Smim19	AI316807|BG694986|EST-c39	small integral membrane protein 19	protein-coding
chr19	41071479	41071874	+	802	NA	intron (NM_153520, intron 2 of 5)	intron (NM_153520, intron 2 of 5)	5437	NM_153520	226115	Mm.54119	NM_153520	ENSMUSG00000050121	Opalin	Tmem10|Tmp10	oligodendrocytic myelin paranodal and inner loop protein	protein-coding
chr9	32591717	32592064	+	851	NA	Intergenic	Intergenic	-50438	NM_008026	14247	Mm.258908	NM_008026	ENSMUSG00000016087	Fli1	EWSR2|Fli-1|SIC-1|Sic1	Friend leukemia integration 1	protein-coding
chr2	165388009	165388435	+	827	NA	promoter-TSS (NM_178411)	promoter-TSS (NM_178411)	37	NM_178411	228876	Mm.26316	NM_178411	ENSMUSG00000017667	Zfp334	D2Ertd535e	zinc finger protein 334	protein-coding
chr15	89335558	89336514	+	575	NA	exon (NM_019977, exon 6 of 10)	exon (NM_019977, exon 6 of 10)	1563	NM_019977	56727	Mm.158200	NM_019977	ENSMUSG00000022613	Miox	0610009I10Rik|AI314022|Aldrl6|C85427|RSOR	myo-inositol oxygenase	protein-coding
chr15	4642855	4643217	+	852	NA	Intergenic	Intergenic	-84174	NM_016704	12274	Mm.20247	NM_016704	ENSMUSG00000022181	C6	AW111623	complement component 6	protein-coding
chr5	66654333	66654614	+	715	NA	intron (NR_102714, intron 1 of 4)	ID_B1|SINE|B4	-21648	NM_011670	22223	Mm.29807	NM_011670	ENSMUSG00000029223	Uchl1	AW822034|C88048|PGP 9.5|PGP9.5|R75593|UCH-L1|UCHL-1|gad	ubiquitin carboxy-terminal hydrolase L1	protein-coding
chr15	79878943	79879887	+	803	NA	Intergenic	Charlie25|DNA|hAT-Charlie	-12993	NM_001160415	80287	Mm.284059	NM_030255	ENSMUSG00000009585	Apobec3	Apobec|Arp3|BC003314|Cem15|Gm20117|Rfv3	apolipoprotein B mRNA editing enzyme, catalytic polypeptide 3	protein-coding
chr4	126046772	126047514	+	1000	NA	exon (NM_025544, exon 1 of 8)	exon (NM_025544, exon 1 of 8)	215	NM_025544	66407	Mm.195628	NM_025544	ENSMUSG00000028861	Mrps15	1500003E24Rik|2410002B11Rik|Mprs15	mitochondrial ribosomal protein S15	protein-coding
chr5	125532327	125532789	+	598	NA	5' UTR (NM_001190352, exon 1 of 9)	5' UTR (NM_001190352, exon 1 of 9)	140	NM_001190352	208151	Mm.40397	NM_001190352	ENSMUSG00000070498	Tmem132b	AK220418|mKIAA1786	transmembrane protein 132B	protein-coding
chr18	11839229	11840242	+	693	NA	promoter-TSS (NR_045421)	promoter-TSS (NR_045421)	-358	NR_045421	621998	Mm.353277	NR_045421		Gm6277	-	predicted gene 6277	ncRNA
chr7	141443931	141444122	+	638	NA	promoter-TSS (NM_001360524)	promoter-TSS (NM_001360524)	-1	NR_153591	57913	Mm.334321	NM_022654	ENSMUSG00000025507	Pidd1	1200011D09Rik|AU042446|Lrdd|Pidd	p53 induced death domain protein 1	protein-coding
chr9	55326493	55326957	+	711	NA	promoter-TSS (NM_001357568)	promoter-TSS (NM_001357568)	-188	NM_172923	244886	Mm.24361	NM_172923	ENSMUSG00000032313	Tmem266	9630029F15|AI118078|HVRP1	transmembrane protein 266	protein-coding
chr4	155734178	155735227	+	650	NA	promoter-TSS (NM_001101506)	promoter-TSS (NM_001101506)	-102	NM_001101506	381582	Mm.379515	NM_001101506	ENSMUSG00000084845	Tmem240	EG381582|Gm5151	transmembrane protein 240	protein-coding
chr5	123508182	123509012	+	689	NA	TTS (NM_001289821)	TTS (NM_001289821)	-1863	NM_198611	231727	Mm.484068	NM_198611	ENSMUSG00000029431	B3gnt4	1010001G17Rik|BGnT-4	UDP-GlcNAc:betaGal beta-1,3-N-acetylglucosaminyltransferase 4	protein-coding
chr2	164725973	164726323	+	738	NA	Intergenic	Intergenic	10843	NM_001040055	641368	Mm.422380	NM_001040055	ENSMUSG00000074593	Spint5	Gm14316	serine protease inhibitor, Kunitz type 5	protein-coding
chr8	122443349	122443790	+	1000	NA	promoter-TSS (NR_028354)	promoter-TSS (NR_028354)	-87	NR_045696	100689703	Mm.271989	NR_045696		9330133O14Rik	-	RIKEN cDNA 9330133O14 gene	ncRNA
chr13	111808109	111809826	+	785	NA	promoter-TSS (NM_011945)	promoter-TSS (NM_011945)	26	NM_011945	26401	Mm.15918	NM_011945	ENSMUSG00000021754	Map3k1	MAPKKK1|MEKK1|Mekk	mitogen-activated protein kinase kinase kinase 1	protein-coding
chr7	44986151	44987201	+	1000	NA	promoter-TSS (NM_001252477)	promoter-TSS (NM_001252477)	-224	NR_045266	100502630	Mm.490013	NR_045266	ENSMUSG00000087138	Gm15545	-	predicted gene 15545	ncRNA
chr13	68581787	68582692	+	1000	NA	promoter-TSS (NR_131892)	promoter-TSS (NR_131892)	29	NM_027123	69577	Mm.23670	NM_027123	ENSMUSG00000021532	Fastkd3	2310010B21Rik|AW048587	FAST kinase domains 3	protein-coding
chr15	78406333	78406988	+	646	NA	promoter-TSS (NM_001162493)	promoter-TSS (NM_001162493)	-52	NM_001162493	246221	Mm.294215	NM_138670	ENSMUSG00000071711	Mpst	Mst	mercaptopyruvate sulfurtransferase	protein-coding
chr7	89404043	89404990	+	725	NA	promoter-TSS (NM_001360746)	promoter-TSS (NM_001360746)	150	NM_008055	14366	Mm.86755	NM_008055	ENSMUSG00000049791	Fzd4	Fz4	frizzled class receptor 4	protein-coding
chr11	97685668	97686024	+	851	NA	promoter-TSS (NM_001085500)	promoter-TSS (NM_001085500)	-87	NM_001085500	217149	Mm.29659	NM_001085500	ENSMUSG00000078695	Cisd3	Mel-13|Mel13	CDGSH iron sulfur domain 3	protein-coding
chr8	70139030	70139441	+	660	NA	promoter-TSS (NM_011266)	promoter-TSS (NM_011266)	-38	NM_001025589	19727	Mm.161167	NM_011266	ENSMUSG00000036120	Rfxank	Tvl1	regulatory factor X-associated ankyrin-containing protein	protein-coding
chr4	137085517	137085951	+	546	NA	Intergenic	Intergenic	-37039	NM_198248	230848	Mm.31068	NM_198248	ENSMUSG00000060862	Zbtb40	BC059177|C230087D24|Gm571|mKIAA0478	zinc finger and BTB domain containing 40	protein-coding
chr2	30794523	30795065	+	903	NA	TTS (NR_028487)	TTS (NR_028487)	6943	NM_198000	73598	Mm.34166	NM_198000	ENSMUSG00000044320	1700001O22Rik	1700113K14Rik|4930549G18Rik	RIKEN cDNA 1700001O22 gene	protein-coding
chr8	40511048	40512508	+	1000	NA	promoter-TSS (NM_033560)	promoter-TSS (NM_033560)	-5	NM_033560	52348	Mm.489696	NM_033560	ENSMUSG00000031600	Vps37a	2210018P21Rik|4930592A21Rik|AW261445|D8Ertd531e	vacuolar protein sorting 37A	protein-coding
chr15	30400639	30401131	+	572	NA	intron (NM_008729, intron 2 of 22)	intron (NM_008729, intron 2 of 22)	228351	NM_008729	18163	Mm.321648	NM_008729	ENSMUSG00000022240	Ctnnd2	Catnd2|Nprap|neurojugin	catenin (cadherin associated protein), delta 2	protein-coding
chr16	17619292	17619635	+	590	NA	intron (NM_001164611, intron 1 of 18)	CpG	109	NM_001164611	77626	Mm.34659	NM_029945	ENSMUSG00000005899	Smpd4	4122402O22Rik	sphingomyelin phosphodiesterase 4	protein-coding
chr4	134551888	134552260	+	630	NA	promoter-TSS (NM_029100)	promoter-TSS (NM_029100)	92	NM_029100	74777	Mm.29773	NM_029100	ENSMUSG00000050989	Selenon	1110019I12Rik|AI414492|SelN|Sepn1	selenoprotein N	protein-coding
chr3	35932314	35933333	+	942	NA	promoter-TSS (NM_001205362)	promoter-TSS (NM_001205362)	143	NM_001205361	114893	Mm.374810	NM_033623	ENSMUSG00000027708	Dcun1d1	Rp42|SCCRO|Tes3|pTes3	DCN1, defective in cullin neddylation 1, domain containing 1 (S. cerevisiae)	protein-coding
chr7	45135987	45136619	+	724	NA	intron (NM_013520, intron 1 of 8)	intron (NM_013520, intron 1 of 8)	129	NR_102725	14256	Mm.1658	NM_013520	ENSMUSG00000110206	Flt3l	Flt3lg|Ly72L	FMS-like tyrosine kinase 3 ligand	protein-coding
chr1	161034324	161035272	+	1000	NA	promoter-TSS (NR_151479)	promoter-TSS (NR_151479)	51	NR_151478	240869	Mm.296127	NM_173424	ENSMUSG00000043467	Zbtb37	D430004I08Rik	zinc finger and BTB domain containing 37	protein-coding
chr11	86894201	86894479	+	899	NA	Intergenic	Intergenic	-41682	NR_162780	114483630		NR_162780		Mir12182	mmu-mir-12182	microRNA mir-12182	ncRNA
chr13	91807168	91807821	+	693	NA	intron (NM_145453, intron 1 of 5)	CpG	202	NM_145453	69085	Mm.52356	NM_145453	ENSMUSG00000021621	Zcchc9	1810019C21Rik	zinc finger, CCHC domain containing 9	protein-coding
chr2	35979157	35979956	+	1000	NA	exon (NM_029774, exon 1 of 10)	exon (NM_029774, exon 1 of 10)	264	NM_029774	74410	Mm.21591	NM_028921	ENSMUSG00000026885	Ttll11	4932702F08Rik|4933424A20Rik|AU043211|D2Ertd624e	tubulin tyrosine ligase-like family, member 11	protein-coding
chr15	84450662	84450867	+	585	NA	Intergenic	Intergenic	-3667	NM_001163145	72301	Mm.275387	NM_001163145	ENSMUSG00000062760	Shisal1	1810041L15Rik|Kiaa1644	shisa like 1	protein-coding
chr1	59670196	59671114	+	583	NA	intron (NM_009460, intron 1 of 4)	L1MDb|LINE|L1	179	NM_009460	22218	Mm.362118	NM_009460	ENSMUSG00000026021	Sumo1	GMP1|PIC1|SENTRIN|SMT3|SMT3H3|SMTP3|SUMO-1|Smt3C|Ubl1	small ubiquitin-like modifier 1	protein-coding
chr7	43919913	43920138	+	720	NA	Intergenic	Intergenic	-13746	NM_174865	317652	Mm.389896	NM_174865	ENSMUSG00000055193	Klk15	-	kallikrein related-peptidase 15	protein-coding
chr7	100371616	100372541	+	1000	NA	promoter-TSS (NM_001017985)	promoter-TSS (NM_001017985)	-155	NM_001017985	277939	Mm.276374	NM_001017985	ENSMUSG00000047248	C2cd3	AU020772	C2 calcium-dependent domain containing 3	protein-coding
chr6	84225366	84225927	+	569	NA	Intergenic	Intergenic	198192	NR_046063	100038556	Mm.387783	NR_046063	ENSMUSG00000107797	Gm10445	-	predicted gene 10445	ncRNA
chr8	84689032	84689382	+	596	NA	promoter-TSS (NM_198020)	promoter-TSS (NM_198020)	-40	NM_198020	212528	Mm.275720	NM_198020	ENSMUSG00000001909	Trmt1	6720406L13Rik|6720477L24|D8Ertd812e	tRNA methyltransferase 1	protein-coding
chr2	33617577	33617975	+	560	NA	intron (NM_010725, intron 2 of 7)	intron (NM_010725, intron 2 of 7)	23322	NM_010725	16917	Mm.39825	NM_010725	ENSMUSG00000038765	Lmx1b	Icst|LMX1.1|LMX1.2	LIM homeobox transcription factor 1 beta	protein-coding
chrX	74836691	74837180	+	544	NA	promoter-TSS (NM_001081670)	promoter-TSS (NM_001081670)	-261	NM_001081670	546325	Mm.436644	NM_001081670	ENSMUSG00000079531	Gm5936	EG546325	predicted gene 5936	protein-coding
chr10	59221231	59222465	+	1000	NA	promoter-TSS (NM_001024911)	promoter-TSS (NM_001024911)	-1	NM_001024910	103080	Mm.346842	NM_001024910	ENSMUSG00000019917	2021-09-10	4921515A04Rik|9430099J10Rik|AA408298|AI874685	septin 10	protein-coding
chr11	119989146	119989607	+	679	NA	intron (NM_001037754, intron 6 of 13)	intron (NM_001037754, intron 6 of 13)	-25391	NR_037225	100526518		NR_037225	ENSMUSG00000105524	Mir3065	mir-3065|mmu-mir-3065	microRNA 3065	ncRNA
chr11	95384321	95384979	+	736	NA	promoter-TSS (NM_001357797)	promoter-TSS (NM_001357797)	-206	NM_001357797	110172	Mm.4593	NM_016752	ENSMUSG00000020873	Slc35b1	UGTrel1|Ugalt2	solute carrier family 35, member B1	protein-coding
chr7	27674276	27674960	+	925	NA	promoter-TSS (NM_198417)	promoter-TSS (NM_198417)	-37	NM_001290528	269881	Mm.389883	NM_001081292	ENSMUSG00000040390	Map3k10	BC028668|BC046514|MST|Mlk2	mitogen-activated protein kinase kinase kinase 10	protein-coding
chr1	132095440	132095946	+	787	NA	Intergenic	Intergenic	-27631	NM_001114662	213006	Mm.208445	NM_172510	ENSMUSG00000059149	Mfsd4a	A230072B04|A930031D07Rik|AI850289|Mfsd4	major facilitator superfamily domain containing 4A	protein-coding
chr5	91282975	91283333	+	687	NA	promoter-TSS (NR_040428)	promoter-TSS (NR_040428)	-78	NR_040428	100503265	Mm.125059	NR_040428	ENSMUSG00000107198	Gm19619	-	predicted gene, 19619	ncRNA
chr4	106621982	106622626	+	653	NA	promoter-TSS (NM_177667)	promoter-TSS (NM_177667)	-145	NM_177667	230576	Mm.41945	NM_177667	ENSMUSG00000034919	Ttc22	4732467L16Rik	tetratricopeptide repeat domain 22	protein-coding
chr6	145110903	145111119	+	552	NA	Intergenic	Intergenic	-4625	NM_001281981	16970	Mm.843	NM_008511	ENSMUSG00000030263	Lrmp	D6Int3|D6Int4|D6Int5|D6Int7|D6Int8|Jaw1	lymphoid-restricted membrane protein	protein-coding
chr7	45617037	45617635	+	767	NA	promoter-TSS (NM_008051)	promoter-TSS (NM_008051)	-270	NM_008051	14343	Mm.56933	NM_008051	ENSMUSG00000008461	Fut1	-	fucosyltransferase 1	protein-coding
chr2	32287759	32288934	+	1000	NA	promoter-TSS (NM_001290552)	promoter-TSS (NM_001290552)	20	NM_133852	99412	Mm.106376	NM_133852	ENSMUSG00000002546	Golga2	AW555139|GM130	golgi autoantigen, golgin subfamily a, 2	protein-coding
chr9	59539526	59540147	+	632	NA	exon (NM_010421, exon 1 of 14)	exon (NM_010421, exon 1 of 14)	296	NM_010421	15211	Mm.2284	NM_010421	ENSMUSG00000025232	Hexa	Hex-1	hexosaminidase A	protein-coding
chr11	101253612	101254326	+	685	NA	intron (NM_001284411, intron 1 of 5)	CpG	262	NM_001284414	28084	Mm.301020	NM_026776	ENSMUSG00000078656	Vps25	1110020N13Rik|AW107467|D11Wsu68e	vacuolar protein sorting 25	protein-coding
chr2	26122352	26123230	+	742	NA	promoter-TSS (NM_026495)	promoter-TSS (NM_026495)	20	NM_026495	67991	Mm.131074	NM_026495	ENSMUSG00000026932	Nacc2	0610020I02Rik|AI448087|Btbd14a|C030048H19Rik	nucleus accumbens associated 2, BEN and BTB (POZ) domain containing	protein-coding
chr15	102100194	102100873	+	930	NA	Intergenic	CpG	-2401	NM_153533	209039	Mm.29389	NM_153533	ENSMUSG00000037003	Tns2	C1-ten|Tenc1|nep|nph	tensin 2	protein-coding
chr4	41464576	41465602	+	1000	NA	promoter-TSS (NM_024241)	promoter-TSS (NM_024241)	-59	NM_025539	66401	Mm.28574	NM_025539	ENSMUSG00000028443	Nudt2	2310051L06Rik|AA939917|APAH1	nudix (nucleoside diphosphate linked moiety X)-type motif 2	protein-coding
chr5	26165342	26165829	+	558	NA	Intergenic	Intergenic	-44160	NM_001134299	434689	Mm.484129	NM_001134299	ENSMUSG00000067698	Gm10220	-	predicted gene 10220	protein-coding
chr4	135920524	135921128	+	596	NA	promoter-TSS (NM_024243)	promoter-TSS (NM_024243)	100	NM_024243	71665	Mm.439940	NM_024243	ENSMUSG00000028673	Fuca1	0610006A03Rik|9530055J05Rik|Afuc|Fuca	fucosidase, alpha-L- 1, tissue	protein-coding
chr16	35870790	35871382	+	624	NA	intron (NM_001039530, intron 1 of 16)	CpG	296	NM_001039530	547253	Mm.244406	NM_001039530	ENSMUSG00000034422	Parp14	1600029O10Rik|ARTD8|BC021340|CoaSt6|mKIAA1268	poly (ADP-ribose) polymerase family, member 14	protein-coding
chr15	101772161	101773102	+	898	NA	Intergenic	Intergenic	-9127	NR_033444	406222	Mm.359153	NM_001003669	ENSMUSG00000067596	Krt74	K74|Kb37	keratin 74	pseudo
chr7	127207910	127209433	+	728	NA	promoter-TSS (NM_001347655)	promoter-TSS (NM_001347655)	-203	NM_144522	68449	Mm.41420	NM_144522	ENSMUSG00000042492	Tbc1d10b	1110003P22Rik|C87963	TBC1 domain family, member 10b	protein-coding
chr13	55996580	55997328	+	545	NA	Intergenic	Intergenic	138596	NM_012015	26914	Mm.283802	NM_012015	ENSMUSG00000015937	H2afy	H2AF12M|mH2a1|macroH2A1	H2A histone family, member Y	protein-coding
chr11	69323695	69324166	+	1000	NA	promoter-TSS (NM_172560)	promoter-TSS (NM_172560)	-56	NM_001024206	245828	Mm.28073	NM_001024206	ENSMUSG00000049299	Trappc1	BET5|D11Ertd172e|MUM2	trafficking protein particle complex 1	protein-coding
chr15	76899739	76899988	+	641	NA	promoter-TSS (NM_025536)	promoter-TSS (NM_025536)	-78	NM_025536	66398	Mm.291716	NM_025536	ENSMUSG00000055041	Commd5	2310065H03Rik|AI854466|D15Ertd81e|Hcarg	COMM domain containing 5	protein-coding
chr13	55099955	55100346	+	561	NA	intron (NR_121592, intron 1 of 13)	CpG	150	NR_121592	20184	Mm.259301	NM_011307	ENSMUSG00000025878	Uimc1	9430016E08Rik|D330018D10Rik|D630032M02Rik|RIP110|Rxrip110	ubiquitin interaction motif containing 1	protein-coding
chr1	183296938	183297426	+	639	NA	promoter-TSS (NM_027861)	promoter-TSS (NM_027861)	111	NM_001357242	71678	Mm.392270	NM_027861	ENSMUSG00000046836	Brox	0610010K06Rik	BRO1 domain and CAAX motif containing	protein-coding
chr10	122678551	122679418	+	860	NA	promoter-TSS (NR_106182)	promoter-TSS (NR_106182)	222	NM_001110218	319468	Mm.489703	NM_176919	ENSMUSG00000034613	Ppm1h	A430075L18Rik|ARHCL1|C030002B11Rik	protein phosphatase 1H (PP2C domain containing)	protein-coding
chr4	137387934	137388846	+	856	NA	Intergenic	CpG	21401	NM_001126318	242711	Mm.475541	NM_001126318	ENSMUSG00000078520	Cela3a	Gm13011	chymotrypsin-like elastase family, member 3A	protein-coding
chr14	99045848	99046713	+	1000	NA	promoter-TSS (NM_175265)	promoter-TSS (NM_175265)	-97	NR_153765	77744	Mm.23503	NM_175265	ENSMUSG00000022070	Bora	6720463M24Rik|AI317232	bora, aurora kinase A activator	protein-coding
chr17	35379002	35379882	+	594	NA	promoter-TSS (NM_001143689)	promoter-TSS (NM_001143689)	-175	NM_001143689	15015	Mm.464284	NM_001143689	ENSMUSG00000035929	H2-Q4	H-2Q4|H2-D1|H2-Gs10|Qa-4|Qa4|Qat-4|Qb-1|Qb1	histocompatibility 2, Q region locus 4	protein-coding
chr5	149439555	149439903	+	555	NA	promoter-TSS (NM_001310765)	promoter-TSS (NM_001310765)	69	NM_001310765	75860	Mm.159605	NM_029464	ENSMUSG00000029660	Tex26	4930588N13Rik	testis expressed 26	protein-coding
chr7	45717894	45718382	+	716	NA	promoter-TSS (NM_001172561)	promoter-TSS (NM_001172561)	67	NM_009077	19899	Mm.3459	NM_009077	ENSMUSG00000059070	Rpl18	L18|Rpl18a	ribosomal protein L18	protein-coding
chr4	43010203	43010630	+	854	NA	promoter-TSS (NM_053081)	promoter-TSS (NM_053081)	-115	NM_001163233	60534	Mm.23122	NM_053081	ENSMUSG00000028453	Fancg	AU041407|Xrcc9	Fanconi anemia, complementation group G	protein-coding
chr13	56323878	56324197	+	573	NA	Intergenic	Intergenic	-27486	NM_019568	57266	Mm.30211	NM_019568	ENSMUSG00000021508	Cxcl14	1110031L23Rik|1200006I23Rik|AI414372|BMAC|BRAK|KS1|Kec|MIP-2g|MIP2gamma|NJAC|Scyb14|bolekine	chemokine (C-X-C motif) ligand 14	protein-coding
chr4	147633801	147634267	+	591	NA	intron (NM_145078, intron 2 of 4)	Lx3B|LINE|L1	8474	NM_145078	112422	Mm.327194	NM_145078	ENSMUSG00000066000	Zfp979	2610305D13Rik|Ssm1b	zinc finger protein 979	protein-coding
chr3	89279224	89279843	+	733	NA	exon (NM_010107, exon 1 of 5)	exon (NM_010107, exon 1 of 5)	112	NM_010107	13636	Mm.15675	NM_010107	ENSMUSG00000027954	Efna1	AI325262|B61|Efl1|Epl1|Eplg1|Lerk1	ephrin A1	protein-coding
chr17	91087836	91088709	+	578	NA	exon (NM_177284, exon 2 of 21)	exon (NM_177284, exon 2 of 21)	1333	NM_001346957	18189	Mm.478418	NM_020252	ENSMUSG00000024109	Nrxn1	1700062G21Rik|9330127H16Rik|A230068P09Rik|mKIAA0578	neurexin I	protein-coding
chr8	83698573	83699277	+	592	NA	intron (NM_177262, intron 1 of 21)	CpG	254	NM_177262	320795	Mm.213000	NM_177262	ENSMUSG00000057672	Pkn1	DBK|F730027O18Rik|PAK1|PRK1|Pkn|Prkcl1|Stk3	protein kinase N1	protein-coding
chr7	28919683	28920066	+	621	NA	intron (NM_001360550, intron 1 of 21)	intron (NM_001360550, intron 1 of 21)	38218	NM_001110807	60594	Mm.476990	NM_021894	ENSMUSG00000054083	Capn12	CANP 12	calpain 12	protein-coding
chr4	116123655	116123892	+	694	NA	promoter-TSS (NR_131048)	promoter-TSS (NR_131048)	-67	NR_131048	76786	Mm.373813	NR_131048	ENSMUSG00000028700	2510003B16Rik	-	RIKEN cDNA 2510003B16 gene	ncRNA
chr9	65884953	65885302	+	820	NA	promoter-TSS (NM_001170907)	promoter-TSS (NM_001170907)	46	NM_001170907	56404	Mm.208379	NM_019797	ENSMUSG00000032386	Trip4	4930558E03Rik|ASC-1|Asc1|BB191711	thyroid hormone receptor interactor 4	protein-coding
chr5	28166619	28167285	+	574	NA	exon (NM_010134, exon 1 of 2)	exon (NM_010134, exon 1 of 2)	1256	NM_010134	13799	Mm.4298	NM_010134	ENSMUSG00000039095	En2	BB131122|En-2|mo-En-2	engrailed 2	protein-coding
chr14	69174751	69175426	+	600	NA	exon (NM_001360218, exon 2 of 2)	exon (NM_001360218, exon 2 of 2)	3136	NM_001360218	18092	Mm.390691	NM_010920	ENSMUSG00000044186	Nkx2-6	AV044928|Nkx-2.6|Nkx2.6|Tix|tinman	NK2 homeobox 6	protein-coding
chr2	180041878	180043422	+	1000	NA	promoter-TSS (NM_011969)	promoter-TSS (NM_011969)	167	NM_178750	269397	Mm.63068	NM_178750	ENSMUSG00000039086	Ss18l1	A230053O16Rik|CREST	SS18, nBAF chromatin remodeling complex subunit like 1	protein-coding
chr15	99553807	99554351	+	575	NA	Intergenic	Charlie1|DNA|hAT-Charlie	-24977	NM_009699	11827	Mm.20206	NM_009699	ENSMUSG00000023013	Aqp2	AQP-CD|WCH-CD|cph|jpk	aquaporin 2	protein-coding
chr1	133025073	133025487	+	882	NA	non-coding (NR_126506, exon 1 of 10)	non-coding (NR_126506, exon 1 of 10)	136	NM_001302804	17248	Mm.426531	NM_008575	ENSMUSG00000054387	Mdm4	4933417N07Rik|AA414968|AL023055|AU018793|AU021806|C85810|Mdmx	transformed mouse 3T3 cell double minute 4	protein-coding
chr7	29783803	29784713	+	878	NA	5' UTR (NM_013705, exon 1 of 5)	5' UTR (NM_013705, exon 1 of 5)	290	NM_001360207	22693	Mm.292690	NM_013705	ENSMUSG00000047473	Zfp30	2610306P15Rik|Zfp-30	zinc finger protein 30	protein-coding
chr4	57167204	57167719	+	555	NA	Intergenic	Intergenic	-4610	NR_040669	329851	Mm.392470	NR_040669	ENSMUSG00000085967	Gm12530	D730003B17	predicted gene 12530	ncRNA
chr12	84417146	84417434	+	740	NA	promoter-TSS (NM_025525)	promoter-TSS (NM_025525)	90	NM_025525	66381	Mm.24846	NM_025525	ENSMUSG00000098134	Rnf113a2	2310020H19Rik|AI426758|Rnf113a	ring finger protein 113A2	protein-coding
chr6	144902422	144903041	+	663	NA	Intergenic	Intergenic	146081	NM_001024468	12035	Mm.4606	NM_007532	ENSMUSG00000030268	Bcat1	BCATc|Eca39	branched chain aminotransferase 1, cytosolic	protein-coding
chr10	81218070	81218313	+	652	NA	intron (NM_178662, intron 3 of 12)	intron (NM_178662, intron 3 of 12)	12595	NM_178662	16467	Mm.127681	NM_178662	ENSMUSG00000034958	Atcay	3322401A10Rik|BB077577|BNIP-H|CLAC|hes|ji	ataxia, cerebellar, Cayman type	protein-coding
chr15	82928734	82929478	+	719	NA	Intergenic	Intergenic	-16972	NM_013836	21411	Mm.252156	NM_013836	ENSMUSG00000041852	Tcf20	2810438H08Rik|SPBP|mKIAA0292	transcription factor 20	protein-coding
chr8	128359492	128359811	+	563	NA	TTS (NR_035436)	TTS (NR_035436)	410	NR_035436	100316680		NR_035436	ENSMUSG00000084523	Mir1903	Mirn1903|mmu-mir-1903	microRNA 1903	ncRNA
chr4	144404255	144405007	+	874	NA	intron (NM_029948, intron 1 of 3)	intron (NM_029948, intron 1 of 3)	3833	NM_029948	77632	Mm.31283	NM_029948	ENSMUSG00000028591	Pramef12	4930569K13Rik|AU023001|C86578	PRAME family member 12	protein-coding
chr19	5874980	5875413	+	573	NA	promoter-TSS (NM_026169)	promoter-TSS (NM_026169)	12	NM_026169	67457	Mm.202092	NM_026169	ENSMUSG00000024816	Frmd8	1200004M23Rik|2310035N23Rik|4931429L16Rik|AU018809|iTAP	FERM domain containing 8	protein-coding
chr9	106071729	106071985	+	707	NA	intron (NM_026763, intron 6 of 37)	intron (NM_026763, intron 6 of 37)	24834	NM_026763	68553	Mm.28854	NM_026763	ENSMUSG00000032572	Col6a4	1110001D15Rik|AI413310|AU023415|Dvwa|EG235580|Vwa6	collagen, type VI, alpha 4	protein-coding
chr11	120783827	120784568	+	688	NA	promoter-TSS (NM_001177874)	promoter-TSS (NM_001177874)	7	NM_009053	19719	Mm.871	NM_009053	ENSMUSG00000025158	Rfng	-	RFNG O-fucosylpeptide 3-beta-N-acetylglucosaminyltransferase	protein-coding
chr16	3908545	3908765	+	582	NA	promoter-TSS (NM_029738)	promoter-TSS (NM_029738)	-2	NR_153801	105246059		NR_153801		Gm41410	-	predicted gene, 41410	ncRNA
chr14	25186054	25186751	+	546	NA	Intergenic	Intergenic	-43161	NR_045718	75862	Mm.109191	NR_045718	ENSMUSG00000114916	4930572O13Rik	-	RIKEN cDNA 4930572O13 gene	ncRNA
chr6	48261257	48261759	+	573	NA	intron (NR_152250, intron 1 of 4)	intron (NR_152250, intron 1 of 4)	133900	NR_152251	100503622	Mm.101433	NR_152250	ENSMUSG00000107875	Gm16630	-	predicted gene, 16630	ncRNA
chr3	89227386	89227655	+	606	NA	promoter-TSS (NR_030579)	promoter-TSS (NR_030579)	-322	NR_030579	100124470		NR_030579	ENSMUSG00000076255	Mir92b	Mirn92b|mir-92b|mmu-mir-92b	microRNA 92b	ncRNA
chr7	97696162	97696832	+	542	NA	promoter-TSS (NM_023671)	promoter-TSS (NM_023671)	-30	NR_154552	102641859	Mm.211743	NR_154551		Rsf1os2	Gm15623	remodeling and spacing factor 1, opposite strand 2	ncRNA
chr15	76870625	76871543	+	581	NA	5' UTR (NM_001007568, exon 1 of 4)	5' UTR (NM_001007568, exon 1 of 4)	351	NM_001007568	71591	Mm.38195	NM_001007568	ENSMUSG00000022526	Zfp251	9130001M19Rik|AV339307	zinc finger protein 251	protein-coding
chr11	102455721	102456389	+	760	NA	intron (NM_010575, intron 27 of 29)	CpG-2677	-8392	NM_199200	217219	Mm.259924	NM_199200	ENSMUSG00000034685	Fam171a2	-	family with sequence similarity 171, member A2	protein-coding
chr11	49169199	49169668	+	556	NA	exon (NM_172793, exon 10 of 10)	exon (NM_172793, exon 10 of 10)	9417	NM_146276	258273	Mm.377407	NM_146276	ENSMUSG00000048378	Olfr1394	MOR280-1	olfactory receptor 1394	protein-coding
chr8	113847949	113848791	+	584	NA	intron (NM_172466, intron 1 of 22)	CpG-14532	469	NM_172466	208936	Mm.167471	NM_172466	ENSMUSG00000053399	Adamts18	9630038L21|ADAMTS21|E130314N14Rik	a disintegrin-like and metallopeptidase (reprolysin type) with thrombospondin type 1 motif, 18	protein-coding
chr10	79908261	79908979	+	671	NA	intron (NM_001359629, intron 1 of 14)	intron (NM_001359629, intron 1 of 14)	318	NM_198107	216154	Mm.260089	NM_198107	ENSMUSG00000013833	Med16	95kDa|A630083L04|DRIP92|Thrap5|Trap95	mediator complex subunit 16	protein-coding
chr4	119422722	119423094	+	563	NA	promoter-TSS (NM_026494)	promoter-TSS (NM_026494)	224	NM_001014900	332934	Mm.388911	NM_001014900	ENSMUSG00000070806	Zmynd12	AI414736	zinc finger, MYND domain containing 12	protein-coding
chr5	37752289	37752669	+	575	NA	Intergenic	Intergenic	16960	NM_001081106	231162	Mm.76407	NM_001081106	ENSMUSG00000062329	Cytl1	4930443F05Rik|4Cytl1|C17|Cyt1|Gm147	cytokine-like 1	protein-coding
chr15	75921227	75921611	+	636	NA	exon (NM_025412, exon 1 of 6)	exon (NM_025412, exon 1 of 6)	141	NM_025412	66194	Mm.250599	NM_025412	ENSMUSG00000022571	Pycrl	1110058B13Rik|2700073G24Rik|Pycr3	pyrroline-5-carboxylate reductase-like	protein-coding
chr9	29239049	29239836	+	794	NA	intron (NM_001357597, intron 2 of 8)	intron (NM_001357597, intron 2 of 8)	173243	NM_001357601	235106	Mm.283138	NM_172290	ENSMUSG00000059974	Ntm	6230410L23Rik|B230210G24Rik|Hnt|Igdcc2|R75390	neurotrimin	protein-coding
chr4	141077997	141078587	+	847	NA	promoter-TSS (NM_025383)	promoter-TSS (NM_025383)	65	NR_149724	66147	Mm.21187	NM_025383	ENSMUSG00000028923	Necap2	1110005F07Rik|AA409105|C78898|NECAP-2	NECAP endocytosis associated 2	protein-coding
chr2	128686974	128687547	+	609	NA	5' UTR (NM_008569, exon 1 of 48)	5' UTR (NM_008569, exon 1 of 48)	135	NM_008569	17222	Mm.277408	NM_008569	ENSMUSG00000014355	Anapc1	2610021O03Rik|AI047775|AI853536|AW547281|Apc1|Mcpr|tsg24	anaphase promoting complex subunit 1	protein-coding
chr2	118256565	118257007	+	805	NA	intron (NM_027759, intron 1 of 10)	CpG	180	NM_027759	71313	Mm.85046	NM_027759	ENSMUSG00000027344	Fsip1	1700012M13Rik|4933432K11Rik	fibrous sheath-interacting protein 1	protein-coding
chr3	89458982	89459671	+	695	NA	promoter-TSS (NM_027348)	promoter-TSS (NM_027348)	208	NM_026784	68603	Mm.34242	NM_026784	ENSMUSG00000027952	Pmvk	1110011E12Rik|2900002L22Rik|AV001327|PMK|PMKA|PMKASE	phosphomevalonate kinase	protein-coding
chr11	121228799	121229547	+	815	NA	promoter-TSS (NM_001254735)	promoter-TSS (NM_001254735)	136	NM_001252548	217370	Mm.27182	NM_144832	ENSMUSG00000039294	Cybc1	-	cytochrome b 245 chaperone 1	protein-coding
chr15	76697890	76698326	+	589	NA	intron (NM_182805, intron 5 of 10)	intron (NM_182805, intron 5 of 10)	1382	NM_182805	76282	Mm.30130	NM_182805	ENSMUSG00000022546	Gpt	1300007J06Rik|2310022B03Rik|ALT|ALT1|Gpt-1|Gpt1	glutamic pyruvic transaminase, soluble	protein-coding
chr17	35979007	35980734	+	949	NA	promoter-TSS (NM_001282013)	promoter-TSS (NM_001282013)	-45	NM_001282013	75210	Mm.40036	NM_145487	ENSMUSG00000038500	Prr3	4930540G07Rik|Cat56	proline-rich polypeptide 3	protein-coding
chr3	135437932	135439398	+	1000	NA	promoter-TSS (NM_025356)	promoter-TSS (NM_025356)	0	NR_030689	319587	Mm.358971	NR_030689	ENSMUSG00000097032	4930539J05Rik	8030475D13Rik	RIKEN cDNA 4930539J05 gene	ncRNA
chr7	19770273	19770785	+	743	NA	promoter-TSS (NM_020486)	promoter-TSS (NM_020486)	3	NM_020486	57278	Mm.29236	NM_020486	ENSMUSG00000002980	Bcam	1200005K12Rik|B-CAM|Gplu|Lu	basal cell adhesion molecule	protein-coding
chr9	43284375	43284934	+	551	NA	Intergenic	MIRb|SINE|MIR	24775	NM_001243261	235302	Mm.135745	NM_001243261		D630033O11Rik	Gm588	RIKEN cDNA D630033O11 gene	protein-coding
chr18	5591463	5593304	+	605	NA	promoter-TSS (NM_001360982)	promoter-TSS (NM_001360982)	54	NR_033552	791318	Mm.84339	NR_033552	ENSMUSG00000063087	Gm10125	Zeb1os	predicted gene 10125	ncRNA
chr5	80951838	80952862	+	589	NA	Intergenic	RMER1A|Other|Other	-68221	NM_001347371	319387	Mm.273631	NM_198702	ENSMUSG00000037605	Adgrl3	5430402I23Rik|CIRL-3|D130075K09Rik|Gm1379|LEC3|Lphn3|mKIAA0768	adhesion G protein-coupled receptor L3	protein-coding
chr15	25494753	25495119	+	930	NA	Intergenic	Intergenic	80744	NR_027376	432939	Mm.146555	NM_001013791		Gm5468	100040583|EG432939	predicted gene 5468	ncRNA
chr17	24205311	24206064	+	750	NA	promoter-TSS (NM_001163848)	promoter-TSS (NM_001163848)	-125	NM_001163848	224617	Mm.301585	NM_173186	ENSMUSG00000036473	Tbc1d24	9630033P11|C530046L02Rik|mKIAA1171	TBC1 domain family, member 24	protein-coding
chr6	59024233	59024730	+	639	NA	promoter-TSS (NM_153574)	promoter-TSS (NM_153574)	21	NM_153574	58909	Mm.28813	NM_153574	ENSMUSG00000037709	Fam13a	AI462012|D430015B01Rik|FAM13A1|Precm1	family with sequence similarity 13, member A	protein-coding
chr9	15305920	15306456	+	1000	NA	promoter-TSS (NM_029248)	promoter-TSS (NM_029248)	-21	NM_001199485	70984	Mm.261842	NM_133732	ENSMUSG00000031938	4931406C07Rik	-	RIKEN cDNA 4931406C07 gene	protein-coding
chr4	149104032	149104580	+	549	NA	exon (NM_010044, exon 1 of 5)	exon (NM_010044, exon 1 of 5)	164	NR_104263	13347	Mm.41433	NM_010044	ENSMUSG00000028974	Dffa	A330085O09Rik|DFF35|Dff45|ICAD|ICAD-L|ICAD-S	DNA fragmentation factor, alpha subunit	protein-coding
chr6	30957791	30959031	+	553	NA	exon (NM_001135093, exon 1 of 1)	exon (NM_001135093, exon 1 of 1)	579	NM_001135093	619665	Mm.204671	NM_001135093	ENSMUSG00000073209	Klf14	5330411L03Rik|AL022736|BTEB5	Kruppel-like factor 14	protein-coding
chr5	3595823	3596899	+	1000	NA	5' UTR (NM_001293806, exon 1 of 24)	5' UTR (NM_001293806, exon 1 of 24)	186	NM_172991	269623	Mm.38014	NM_172991	ENSMUSG00000040302	Rbm48	AW548102|C030048B08Rik	RNA binding motif protein 48	protein-coding
chr6	41192554	41193205	+	674	NA	Intergenic	RMER1A|Other|Other	-109393	NM_011646	22074	Mm.383263	NM_011646	ENSMUSG00000054106	Try4	0910001B19Rik|Td	trypsin 4	protein-coding
chr6	147199329	147199865	+	692	NA	intron (NR_033640, intron 2 of 2)	intron (NR_033640, intron 2 of 2)	19356	NR_033640	100039641	Mm.170402	NR_033640	ENSMUSG00000085600	E330012B07Rik	Gm15768	RIKEN cDNA E330012B07 gene	ncRNA
chr15	75049547	75050398	+	552	NA	Intergenic	Intergenic	-1135	NM_001252056	17067	Mm.1583	NM_010741	ENSMUSG00000079018	Ly6c1	AA682074|AA959465|Ly-6C|Ly-6C1|Ly6c	lymphocyte antigen 6 complex, locus C1	protein-coding
chr6	115886895	115887424	+	822	NA	intron (NM_031177, intron 9 of 28)	intron (NM_031177, intron 9 of 28)	33631	NM_001167763	81896	Mm.333335	NM_031177	ENSMUSG00000030323	Ift122	C86139|Wdr10|sopb	intraflagellar transport 122	protein-coding
chr5	130029074	130029583	+	897	NA	promoter-TSS (NM_007761)	promoter-TSS (NM_007761)	22	NM_007761	12909	Mm.18072	NM_007761	ENSMUSG00000025532	Crcp	AL022669	calcitonin gene-related peptide-receptor component protein	protein-coding
chr11	120369692	120370237	+	750	NA	3' UTR (NM_027980, exon 10 of 10)	3' UTR (NM_027980, exon 10 of 10)	8430	NM_172802	238021	Mm.481403	NM_172802	ENSMUSG00000025380	Fscn2	A930022G03|Ahl8|C630046B20Rik	fascin actin-bundling protein 2	protein-coding
chr10	120898352	120899283	+	803	NA	intron (NM_177092, intron 1 of 6)	CpG	154	NM_177092	320183	Mm.169755	NM_177092	ENSMUSG00000051236	Msrb3	D430026P16Rik|I-8-23|MsrB2	methionine sulfoxide reductase B3	protein-coding
chr15	75597199	75598104	+	603	NA	intron (NM_001361294, intron 3 of 3)	intron (NM_001361294, intron 3 of 3)	1021	NM_026730	68453	Mm.46367	NM_026730	ENSMUSG00000022579	Gpihbp1	1110002J19Rik|GPI-HBP1	GPI-anchored HDL-binding protein 1	protein-coding
chr3	90709793	90710401	+	780	NA	Intergenic	RMER1A|Other|Other	-14376	NM_001281852	20202	Mm.2128	NM_009114	ENSMUSG00000056071	S100a9	60B8Ag|AW546964|BEE22|Cagb|GAGB|L1Ag|MRP14|p14	S100 calcium binding protein A9 (calgranulin B)	protein-coding
chr4	137448021	137449007	+	614	NA	Intergenic	Intergenic	-4782	NM_027063	69380	Mm.272519	NM_027063	ENSMUSG00000041399	1700013G24Rik	AI507018	RIKEN cDNA 1700013G24 gene	protein-coding
chr4	135946325	135946952	+	647	NA	promoter-TSS (NM_001357529)	promoter-TSS (NM_001357529)	190	NM_008254	15356	Mm.482102	NM_008254	ENSMUSG00000028672	Hmgcl	AW476067|HL	3-hydroxy-3-methylglutaryl-Coenzyme A lyase	protein-coding
chr7	141338579	141339050	+	849	NA	promoter-TSS (NM_001282073)	promoter-TSS (NM_001282073)	-31	NM_001282073	54006	Mm.28392	NM_016874	ENSMUSG00000058886	Deaf1	AU042387|C230009B13Rik|NUDR	DEAF1, transcription factor	protein-coding
chr10	22393064	22393828	+	637	NA	Intergenic	Intergenic	-9367	NR_028580	100038752	Mm.392859	NR_028580	ENSMUSG00000096937	Gm10825	-	predicted gene 10825	ncRNA
chr11	53763345	53764124	+	708	NA	promoter-TSS (NR_106131)	promoter-TSS (NR_106131)	-80	NR_106131	102465772		NR_106131	ENSMUSG00000099153	Mir7671	Gm27802|mmu-mir-7671	microRNA 7671	ncRNA
chr4	155085843	155086831	+	1000	NA	promoter-TSS (NM_001362981)	promoter-TSS (NM_001362981)	16	NM_001362981	67830	Mm.241604	NM_026395	ENSMUSG00000029048	Rer1	1110060F11Rik|5830454N22Rik|AU043380	retention in endoplasmic reticulum sorting receptor 1	protein-coding
chr12	55079849	55080605	+	943	NA	promoter-TSS (NM_011899)	promoter-TSS (NM_011899)	-117	NR_155260	72658	Mm.434380	NM_028314	ENSMUSG00000062198	2700097O09Rik	AW552125	RIKEN cDNA 2700097O09 gene	protein-coding
chr15	101224038	101224871	+	665	NA	promoter-TSS (NR_045326)	promoter-TSS (NR_045326)	247	NM_019518	56149	Mm.276573	NM_019518	ENSMUSG00000000531	Grasp	tamalin	GRP1 (general receptor for phosphoinositides 1)-associated scaffold protein	protein-coding
chr19	41933184	41933743	+	1000	NA	promoter-TSS (NM_001164561)	promoter-TSS (NM_001164561)	18	NM_001360676	74168	Mm.20387	NM_023740	ENSMUSG00000025157	Zdhhc16	1500015N03Rik|Aph2	zinc finger, DHHC domain containing 16	protein-coding
chr4	39568245	39569003	+	727	NA	Intergenic	Intergenic	118331	NM_001081095	75471	Mm.23522	NM_001081095	ENSMUSG00000028287	1700009N14Rik	AI429145	RIKEN cDNA 1700009N14 gene	protein-coding
chr12	76195977	76196403	+	780	NA	Intergenic	Intergenic	-18931	NR_104386	13983	Mm.2561	NM_010157	ENSMUSG00000021055	Esr2	ER[b]|ERbeta|Estrb	estrogen receptor 2 (beta)	protein-coding
chr2	132879323	132880039	+	645	NA	exon (NM_177303, exon 2 of 5)	exon (NM_177303, exon 2 of 5)	1181	NM_177303	320974	Mm.357342	NM_177303	ENSMUSG00000043110	Lrrn4	B430119L13Rik|Nlrr4	leucine rich repeat neuronal 4	protein-coding
chr4	133545666	133546253	+	921	NA	promoter-TSS (NM_010948)	promoter-TSS (NM_010948)	68	NM_010948	18221	Mm.69	NM_010948	ENSMUSG00000028851	Nudc	SIG-92|Silg92	nudC nuclear distribution protein	protein-coding
chr4	154071487	154072154	+	600	NA	intron (NM_001126331, intron 2 of 9)	C-rich|Low_complexity|Low_complexity	25353	NM_001126330	22062	Mm.78015	NM_011642	ENSMUSG00000029026	Trp73	TAp73|Tp73|deltaNp73|p73	transformation related protein 73	protein-coding
chr7	45466377	45467060	+	814	NA	intron (NM_007527, intron 1 of 5)	CpG	180	NM_007527	12028	Mm.19904	NM_007527	ENSMUSG00000003873	Bax	-	BCL2-associated X protein	protein-coding
chr7	25306067	25306622	+	584	NA	intron (NM_183311, intron 1 of 14)	GC_rich|Low_complexity|Low_complexity	236	NM_183311	330485	Mm.260740	NM_183311	ENSMUSG00000043843	Tmem145	B930076A02Rik	transmembrane protein 145	protein-coding
chr9	60712989	60713290	+	555	NA	promoter-TSS (NM_026235)	promoter-TSS (NM_026235)	18	NM_026235	67557	Mm.44546	NM_026235	ENSMUSG00000034839	Larp6	5430431G03Rik|AI552438|Achn	La ribonucleoprotein domain family, member 6	protein-coding
chr9	44652123	44652704	+	574	NA	Intergenic	Lx8|LINE|L1	-20820	NM_001277851	58866	Mm.45380	NM_021481	ENSMUSG00000032098	Treh	2210412M19Rik	trehalase (brush-border membrane glycoprotein)	protein-coding
chr5	145059565	145059910	+	549	NA	Intergenic	ZP3AR|Satellite|Satellite	16747	NM_027069	69396	Mm.45463	NM_027069	ENSMUSG00000029620	1700018F24Rik	AV045857	RIKEN cDNA 1700018F24 gene	protein-coding
chr12	85140115	85140499	+	616	NA	intron (NM_146244, intron 6 of 10)	intron (NM_146244, intron 6 of 10)	10957	NM_001364317	238323	Mm.44829	NM_146244	ENSMUSG00000019235	Rps6kl1	A830084F09Rik|AW046440	ribosomal protein S6 kinase-like 1	protein-coding
chr9	106247257	106248110	+	839	NA	promoter-TSS (NM_001291835)	promoter-TSS (NM_001291835)	47	NM_001291835	11655	Mm.290578	NM_020559	ENSMUSG00000032786	Alas1	ALAS|ALAS-N|Alas-1|Alas-h	aminolevulinic acid synthase 1	protein-coding
chr17	46202358	46203032	+	1000	NA	promoter-TSS (NM_030715)	promoter-TSS (NM_030715)	-54	NM_001364947	80905	Mm.311585	NM_030715	ENSMUSG00000023953	Polh	RAD30A|XPV	polymerase (DNA directed), eta (RAD 30 related)	protein-coding
chr11	67052300	67053048	+	1000	NA	promoter-TSS (NM_025510)	promoter-TSS (NM_025510)	4	NM_001040026	52892	Mm.129731	NM_001040026	ENSMUSG00000069844	Sco1	2610001C07Rik|D11Bwg1310e	SCO1 cytochrome c oxidase assembly protein	protein-coding
chr9	31650472	31651106	+	654	NA	Intergenic	Intergenic	-186551	NM_144936	235135	Mm.390134	NM_144936	ENSMUSG00000041737	Tmem45b	BC018222	transmembrane protein 45b	protein-coding
chr11	101095205	101095878	+	856	NA	promoter-TSS (NM_008949)	promoter-TSS (NM_008949)	-106	NM_008949	19183	Mm.18344	NM_008949	ENSMUSG00000019303	Psmc3ip	C79099|GT198|HOP2|Tbpip	proteasome (prosome, macropain) 26S subunit, ATPase 3, interacting protein	protein-coding
chr15	33614196	33614502	+	829	NA	intron (NR_045070, intron 5 of 5)	intron (NR_045070, intron 5 of 5)	39087	NR_045070	75880	Mm.396109	NR_045070	ENSMUSG00000115779	4930592A05Rik	-	RIKEN cDNA 4930592A05 gene	ncRNA
chr10	117250006	117250624	+	560	NA	Intergenic	Intergenic	-11634	NM_029906	77397	Mm.118350	NM_029906	ENSMUSG00000020177	9530003J23Rik	Lyzf1	RIKEN cDNA 9530003J23 gene	protein-coding
chr5	115300434	115301547	+	1000	NA	promoter-TSS (NR_131932)	promoter-TSS (NR_131932)	0	NM_019682	56455	Mm.256858	NM_019682	ENSMUSG00000009013	Dynll1	Dlc8|Dnclc1|Pin	dynein light chain LC8-type 1	protein-coding
chr6	35379947	35380219	+	871	NA	Intergenic	Intergenic	49237	NR_040526	73409	Mm.69443	NR_040526	ENSMUSG00000107341	1700065J11Rik	-	RIKEN cDNA 1700065J11 gene	ncRNA
chr10	80039454	80039996	+	618	NA	promoter-TSS (NM_025554)	promoter-TSS (NM_025554)	-66	NM_025554	66420	Mm.18579	NM_025554	ENSMUSG00000004667	Polr2e	2410021N14Rik|25kDa|AW208866|RPB5|XAP4	polymerase (RNA) II (DNA directed) polypeptide E	protein-coding
chr4	152165484	152166254	+	632	NA	Intergenic	Intergenic	7002	NM_001301805	15206	Mm.57038	NM_008236	ENSMUSG00000028940	Hes2	HES-2	hes family bHLH transcription factor 2	protein-coding
chr12	85338841	85339592	+	824	NA	exon (NM_145138, exon 1 of 22)	exon (NM_145138, exon 1 of 22)	146	NM_145138	217718	Mm.29071	NM_145138	ENSMUSG00000034290	Nek9	C130021H08Rik	NIMA (never in mitosis gene a)-related expressed kinase 9	protein-coding
chr9	64050080	64050325	+	676	NA	intron (NR_040713, intron 1 of 2)	intron (NR_040713, intron 1 of 2)	373	NR_040713	68697	Mm.491042	NR_040713	ENSMUSG00000097036	1110036E04Rik	-	RIKEN cDNA 1110036E04 gene	ncRNA
chr15	76331025	76331559	+	650	NA	promoter-TSS (NM_010331)	promoter-TSS (NM_010331)	-2	NM_010331	14731	Mm.5903	NM_010331	ENSMUSG00000022561	Gpaa1	C80044|mGAA1	GPI anchor attachment protein 1	protein-coding
chr7	19573047	19573723	+	562	NA	promoter-TSS (NM_027189)	promoter-TSS (NM_027189)	-42	NM_027189	69731	Mm.24540	NM_027189	ENSMUSG00000044709	Gemin7	2400008I04Rik|AI120175|AI461688	gem nuclear organelle associated protein 7	protein-coding
chr9	86571542	86572180	+	1000	NA	promoter-TSS (NM_001163746)	promoter-TSS (NM_001163746)	-19	NM_001163746	109785	Mm.390201	NM_028352	ENSMUSG00000056131	Pgm3	2810473H05Rik|Agm1|BB187688|C77933|PAGM|Pgm-3	phosphoglucomutase 3	protein-coding
chr4	149623425	149624078	+	695	NA	intron (NM_001290989, intron 2 of 17)	intron (NM_001290989, intron 2 of 17)	31816	NR_105990	102465983		NR_105990	ENSMUSG00000098580	Mir7023	Gm27912|mmu-mir-7023	microRNA 7023	ncRNA
chr8	72443544	72444079	+	902	NA	promoter-TSS (NM_028170)	promoter-TSS (NM_028170)	-33	NM_028500	73316	Mm.196315	NM_028500	ENSMUSG00000019732	Calr3	1700031L01Rik|6330586I20Rik|Crt2|cspn	calreticulin 3	protein-coding
chr6	65671285	65671965	+	665	NA	promoter-TSS (NM_172399)	promoter-TSS (NM_172399)	14	NM_172399	68169	Mm.52392	NM_172399	ENSMUSG00000049001	Ndnf	A930038C07Rik|epidermacan	neuron-derived neurotrophic factor	protein-coding
chr11	78535867	78536638	+	1000	NA	promoter-TSS (NM_001159392)	promoter-TSS (NM_001159392)	8	NM_001159392	21927	Mm.386774	NM_009395	ENSMUSG00000017615	Tnfaip1	Bacurd2|Edp-1|Edp1|Tnfip1	tumor necrosis factor, alpha-induced protein 1 (endothelial)	protein-coding
chr17	22423851	22424538	+	678	NA	promoter-TSS (NM_001331198)	promoter-TSS (NM_001331198)	-8	NM_001331197	74149	Mm.30767	NM_198003	ENSMUSG00000071266	Zfp946	1300003B13Rik	zinc finger protein 946	protein-coding
chr7	24355825	24356353	+	624	NA	Intergenic	L2c|LINE|L2	6893	NM_029806	76942	Mm.261468	NM_029806	ENSMUSG00000030484	Lypd5	2210003I03Rik|2310011E23Rik	Ly6/Plaur domain containing 5	protein-coding
chr2	121413392	121414114	+	1000	NA	promoter-TSS (NM_007952)	promoter-TSS (NM_007952)	39	NM_153075	212670	Mm.384318	NM_153075	ENSMUSG00000033486	Catsper2	-	cation channel, sperm associated 2	protein-coding
chr14	14345511	14346367	+	681	NA	promoter-TSS (NM_008369)	promoter-TSS (NM_008369)	-556	NM_008369	16188	Mm.425857	NM_008369	ENSMUSG00000068758	Il3ra	CD123|CDw123|SUT-1	interleukin 3 receptor, alpha chain	protein-coding
chr11	44616874	44617368	+	896	NA	promoter-TSS (NM_001290709)	promoter-TSS (NM_001290709)	-979	NM_001290710	13591	Mm.439662	NM_007897	ENSMUSG00000057098	Ebf1	Ebf|O/E-1|OE-1|Olf-1|Olf1	early B cell factor 1	protein-coding
chr9	115356637	115356968	+	545	NA	Intergenic	Intergenic	20641	NR_040730	73856	Mm.399156	NR_040730		4930428G15Rik	-	RIKEN cDNA 4930428G15 gene	ncRNA
chr13	58402044	58403123	+	990	NA	promoter-TSS (NM_001301345)	promoter-TSS (NM_001301345)	-14	NM_028904	74386	Mm.85289	NM_028904	ENSMUSG00000035367	Rmi1	4932432N11Rik|C79893	RecQ mediated genome instability 1	protein-coding
chr7	79715757	79715983	+	552	NA	Intergenic	CpG	-1684	NM_001291222	16576	Mm.101633	NM_010626	ENSMUSG00000050382	Kif7	-	kinesin family member 7	protein-coding
chrX	73786436	73787235	+	791	NA	promoter-TSS (NM_001356356)	promoter-TSS (NM_001356356)	62	NM_008323	15929	Mm.14825	NM_008323	ENSMUSG00000002010	Idh3g	-	isocitrate dehydrogenase 3 (NAD+), gamma	protein-coding
chr15	85811156	85811852	+	836	NA	intron (NM_197998, intron 1 of 4)	CpG	193	NM_001164625	72355	Mm.33706	NM_197998	ENSMUSG00000064284	Cdpf1	2210021J22Rik	cysteine rich, DPF motif domain containing 1	protein-coding
chrX	94366679	94367289	+	1000	NA	promoter-TSS (NM_026673)	promoter-TSS (NM_026673)	-126	NM_026673	68316	Mm.379156	NM_026673	ENSMUSG00000079508	Apoo	0610008C08Rik|1110019O03Rik|Micos26	apolipoprotein O	protein-coding
chr12	87863180	87863986	+	569	NA	non-coding (NR_033562, exon 1 of 1)	non-coding (NR_033562, exon 1 of 1)	2233	NR_033562	100038982	Mm.16926	NR_033562		Gm1995	-	REX1, RNA exonuclease 1 homolog pseudogene	pseudo
chr12	15800617	15801176	+	788	NA	TTS (NR_105809)	TTS (NR_105809)	205	NR_105809	102465204		NR_105809	ENSMUSG00000098480	Mir6387	Gm27281|mmu-mir-6387	microRNA 6387	ncRNA
chr18	23989490	23989806	+	814	NA	promoter-TSS (NM_011755)	promoter-TSS (NM_011755)	14	NM_011755	22694	Mm.290596	NM_011755	ENSMUSG00000063281	Zfp35	Zfp-35|Znf271|mszf13|mszf20-1|mszf28|mszf68	zinc finger protein 35	protein-coding
chr17	34684064	34684793	+	761	NA	intron (NM_031176, intron 6 of 32)	intron (NM_031176, intron 6 of 32)	13893	NM_031176	81877	Mm.290527	NM_031176	ENSMUSG00000033327	Tnxb	Tn-mhc|Tnx	tenascin XB	protein-coding
chr10	39612921	39613825	+	713	NA	intron (NM_134000, intron 1 of 8)	intron (NM_134000, intron 1 of 8)	309	NR_152259	100504626	Mm.440236	NR_152259		Gm16364	Gm16365	predicted gene 16364	ncRNA
chr7	30626034	30626325	+	651	NA	promoter-TSS (NM_025628)	promoter-TSS (NM_025628)	-65	NM_025628	110323	Mm.400	NM_025628	ENSMUSG00000036751	Cox6b1	2010000G05Rik|COX VIb-1|Cox6b	cytochrome c oxidase, subunit 6B1	protein-coding
chr11	102643837	102644126	+	579	NA	Intergenic	Intergenic	-19565	NR_033474	77132	Mm.194729	NR_033474		2810433D01Rik	-	RIKEN cDNA 2810433D01 gene	ncRNA
chr9	22259472	22260115	+	927	NA	5' UTR (NM_181419, exon 1 of 5)	5' UTR (NM_181419, exon 1 of 5)	102	NM_181419	235048	Mm.292381	NM_181419	ENSMUSG00000062794	Zfp599	6720416P20	zinc finger protein 599	protein-coding
chr5	128789529	128789956	+	609	NA	exon (NM_001081388, exon 12 of 22)	exon (NM_001081388, exon 12 of 22)	53496	NM_021311	57749	Mm.272720	NM_021311	ENSMUSG00000029423	Piwil1	MIWI	piwi-like RNA-mediated gene silencing 1	protein-coding
chr8	105264487	105264804	+	855	NA	promoter-TSS (NM_001033161)	promoter-TSS (NM_001033161)	-3	NM_015821	50788	Mm.334764	NM_015821	ENSMUSG00000033313	Fbxl8	FBL8	F-box and leucine-rich repeat protein 8	protein-coding
chr7	104218746	104219586	+	633	NA	intron (NM_001013616, intron 1 of 7)	intron (NM_001013616, intron 1 of 7)	371	NM_001013616	94088	Mm.274843	NM_001013616	ENSMUSG00000072244	Trim6	C430046K18Rik|D7Ertd684e	tripartite motif-containing 6	protein-coding
chr8	12730825	12731115	+	567	NA	Intergenic	Intergenic	-11843	NR_033546	100038554	Mm.367723	NR_033546	ENSMUSG00000074469	Gm15348	-	predicted gene 15348	ncRNA
chr15	99670409	99670879	+	924	NA	5' UTR (NM_009597, exon 1 of 12)	5' UTR (NM_009597, exon 1 of 12)	267	NM_009597	11419	Mm.440107	NM_009597	ENSMUSG00000023017	Asic1	AI843610|ASIC|ASIC1a|Accn2|B530003N02Rik|BNaC2	acid-sensing (proton-gated) ion channel 1	protein-coding
chr10	70740233	70740578	+	577	NA	Intergenic	Intergenic	-84442	NR_045292	319646	Mm.483039	NR_045291	ENSMUSG00000037747	D630013N20Rik	-	RIKEN cDNA D630013N20 gene	ncRNA
chr9	42944421	42945067	+	680	NA	promoter-TSS (NM_175481)	promoter-TSS (NM_175481)	-373	NM_175481	110637	Mm.370291	NM_175481	ENSMUSG00000032017	Grik4	6330551K01Rik|GluK4|GluRgamma1|KA-1|KA1	glutamate receptor, ionotropic, kainate 4	protein-coding
chr8	71272248	71272877	+	1000	NA	promoter-TSS (NM_001142323)	promoter-TSS (NM_001142323)	28	NM_001363404	76478	Mm.27355	NM_029621	ENSMUSG00000035439	Haus8	2410004L22Rik|Hice1	4HAUS augmin-like complex, subunit 8	protein-coding
chr5	36904751	36905717	+	743	NA	intron (NM_001360003, intron 1 of 8)	intron (NM_001360003, intron 1 of 8)	-28355	NR_045505	71054	Mm.444807	NR_045505	ENSMUSG00000087487	Ppp2r2cos	4933401P06Rik	protein phosphatase 2, regulatory subunit B, gamma, opposite strand	ncRNA
chr15	89075439	89076243	+	933	NA	promoter-TSS (NM_026485)	promoter-TSS (NM_026485)	13	NR_040417	69120	Mm.276391	NR_040417	ENSMUSG00000087331	1810021B22Rik	-	RIKEN cDNA 1810021B22 gene	ncRNA
chr4	132732102	132732742	+	718	NA	TTS (NM_133888)	TTS (NM_133888)	124	NM_201368	381560	Mm.44558	NM_201368	ENSMUSG00000037752	Xkr8	4931440N07Rik|AI597014|Gm1031|XRG8|mXkr8	X-linked Kx blood group related 8	protein-coding
chr5	12995166	12996267	+	568	NA	Intergenic	RMER1A|Other|Other	-401068	NM_001243072	20346	Mm.372039	NM_009152	ENSMUSG00000028883	Sema3a	Hsema-I|SEMA1|SemD|Semad|coll-1	sema domain, immunoglobulin domain (Ig), short basic domain, secreted, (semaphorin) 3A	protein-coding
chr9	67633799	67634185	+	681	NA	Intergenic	CpG	-74289	NM_001081242	70549	Mm.33645	NM_027458	ENSMUSG00000052698	Tln2	5730421P04Rik|AI507121|AI787438|AL118320|mKIAA0320	talin 2	protein-coding
chr15	80704275	80704562	+	769	NA	Intergenic	Intergenic	-6808	NR_045309	106059	Mm.442457	NR_045309	ENSMUSG00000116220	A430088P11Rik	-	RIKEN cDNA A430088P11 gene	ncRNA
chr15	34494801	34495773	+	1000	NA	promoter-TSS (NM_008287)	promoter-TSS (NM_008287)	-24	NM_152894	67724	Mm.248779	NM_026340	ENSMUSG00000022325	Pop1	4932434G09Rik	processing of precursor 1, ribonuclease P/MRP family, (S. cerevisiae)	protein-coding
chr1	93845922	93846252	+	868	NA	intron (NM_178882, intron 8 of 9)	intron (NM_178882, intron 8 of 9)	-15257	NM_199366	381334	Mm.482878	NM_199366	ENSMUSG00000094651	Gal3st2	GP3ST|Gm988	galactose-3-O-sulfotransferase 2	protein-coding
chr6	48444034	48444368	+	808	NA	intron (NM_001085417, intron 1 of 4)	intron (NM_001085417, intron 1 of 4)	889	NM_001085415	68910	Mm.2464	NM_020589	ENSMUSG00000068551	Zfp467	1190001I08Rik|AB041616|AI426952|AV017623|EZI|MNCb-3350|Znf467	zinc finger protein 467	protein-coding
chr4	46138255	46139243	+	713	NA	promoter-TSS (NM_001355376)	promoter-TSS (NM_001355376)	-40	NM_001355376	272027	Mm.249594	NM_173033	ENSMUSG00000035495	Tstd2	3010020C06	thiosulfate sulfurtransferase (rhodanese)-like domain containing 2	protein-coding
chr2	150484794	150485626	+	1000	NA	promoter-TSS (NM_001034900)	promoter-TSS (NM_001034900)	-147	NM_001034900	545471	Mm.451002	NM_001034900	ENSMUSG00000074731	Zfp345	-	zinc finger protein 345	protein-coding
chr7	99248986	99249321	+	683	NA	Intergenic	CpG	-10542	NM_177448	233549	Mm.208030	NM_177448	ENSMUSG00000052396	Mogat2	DGAT2L5|MGAT2|Mgat1l	monoacylglycerol O-acyltransferase 2	protein-coding
chr10	116959306	116960415	+	693	NA	intron (NR_038025, intron 3 of 3)	MT2A|LTR|ERVL	-4880	NR_027847	103175	Mm.27138	NR_027846	ENSMUSG00000031294	D630029K05Rik	AI314111|AI875589	RIKEN cDNA D630029K05 gene	ncRNA
chr3	87756034	87756255	+	621	NA	exon (NM_152799, exon 12 of 25)	exon (NM_152799, exon 12 of 25)	-7521	NM_028971	74485	Mm.474494	NM_028971	ENSMUSG00000023084	Lrrc71	4933430H15Rik	leucine rich repeat containing 71	protein-coding
chr5	131307401	131308189	+	560	NA	promoter-TSS (NM_145218)	promoter-TSS (NM_145218)	-273	NM_145218	212996	Mm.299204	NM_145218	ENSMUSG00000034040	Galnt17	AA388321|E330012B09Rik|Galnt19|Gcap8|Wbscr17	polypeptide N-acetylgalactosaminyltransferase 17	protein-coding
chr2	158658816	158659227	+	578	NA	Intergenic	Intergenic	-7712	NM_153089	228852	Mm.150540	NM_153089	ENSMUSG00000037754	Ppp1r16b	ANKRD4|C130078N17Rik|TIMAP|Wdt4	protein phosphatase 1, regulatory subunit 16B	protein-coding
chr2	177524184	177524503	+	582	NA	Intergenic	RLTR45-int|LTR|ERVK	26117	NR_036450	433520	Mm.425117	NM_001024825		Gm14403	-	predicted gene 14403	ncRNA
chr19	4839091	4839525	+	1000	NA	promoter-TSS (NM_207268)	promoter-TSS (NM_207268)	14	NM_016892	12460	Mm.434411	NM_016892	ENSMUSG00000034108	Ccs	Ccsd	copper chaperone for superoxide dismutase	protein-coding
chr10	80701759	80702820	+	1000	NA	promoter-TSS (NM_027829)	promoter-TSS (NM_027829)	-404	NM_027829	71564	Mm.35802	NM_027829	ENSMUSG00000055862	Izumo4	9030607L17Rik|AI550407	IZUMO family member 4	protein-coding
chr15	80062441	80063267	+	726	NA	Intergenic	Intergenic	15725	NR_028282	100302601		NR_028282	ENSMUSG00000077734	Snord83b	MBII-10	small nucleolar RNA, C/D box 83B	snoRNA
chrX	123612514	123612805	+	652	NA	Intergenic	Intergenic	281094	NR_152851	100113394	Mm.435429	NR_152851		Astx5	Astx|Gm14948	amplified spermatogenic transcripts X encoded 5	ncRNA
chr17	5440522	5440992	+	588	NA	promoter-TSS (NM_027457)	promoter-TSS (NM_027457)	-497	NM_027457	70544	Mm.46654	NM_027457	ENSMUSG00000004945	Tmem242	1110008A10Rik|2310046K16Rik|5730437N04Rik	transmembrane protein 242	protein-coding
chr4	30610469	30610786	+	707	NA	Intergenic	Intergenic	-53969	NR_040655	75332	Mm.108636	NR_040655		4930556G01Rik	-	RIKEN cDNA 4930556G01 gene	ncRNA
chr7	126565882	126566632	+	635	NA	intron (NM_146200, intron 1 of 20)	CpG-13564	109	NM_146200	56347	Mm.22776	NM_146200	ENSMUSG00000030738	Eif3c	110kDa|3230401O13Rik|Eif3s8|NIPIL(A3)|NipilA3|Xs|Xsl	eukaryotic translation initiation factor 3, subunit C	protein-coding
chrX	73008030	73008445	+	697	NA	intron (NM_009549, intron 12 of 18)	intron (NM_009549, intron 12 of 18)	16158	NR_035517	100316779		NR_035517	ENSMUSG00000089357	Mir2137	mmu-mir-2137	microRNA 2137	ncRNA
chr5	147188609	147189208	+	668	NA	exon (NM_008178, exon 1 of 2)	exon (NM_008178, exon 1 of 2)	212	NM_008178	14842	Mm.4797	NM_008178	ENSMUSG00000053129	Gsx1	Gsh-1|Gsh1	GS homeobox 1	protein-coding
chr4	137468331	137469233	+	651	NA	promoter-TSS (NM_008305)	promoter-TSS (NM_008305)	-21	NM_008305	15530	Mm.273662	NM_008305	ENSMUSG00000028763	Hspg2	AI852380|HSPG|Pcn|Plc|per	perlecan (heparan sulfate proteoglycan 2)	protein-coding
chrX	60045212	60046318	+	663	NA	Intergenic	Intergenic	46301	NM_007979	14071	Mm.391283	NM_007979	ENSMUSG00000031138	F9	AW111646|Cf-9|Cf9	coagulation factor IX	protein-coding
chr5	143328794	143329323	+	545	NA	promoter-TSS (NR_027874)	promoter-TSS (NR_027874)	180	NM_028379	72881	Mm.261606	NM_028379	ENSMUSG00000001844	Zdhhc4	1810021D01Rik|2900029I10Rik|DHHC-4	zinc finger, DHHC domain containing 4	protein-coding
chr13	60737925	60738198	+	578	NA	intron (NM_134062, intron 18 of 26)	intron (NM_134062, intron 18 of 26)	48303	NM_199148	218275	Mm.222427	NM_199148	ENSMUSG00000042243	BC051665	-	cDNA sequence BC051665	protein-coding
chr17	21535404	21536021	+	647	NA	5' UTR (NM_144515, exon 1 of 5)	5' UTR (NM_144515, exon 1 of 5)	166	NR_131123	319870	Mm.488274	NR_131123	ENSMUSG00000097781	9330136K24Rik	-	RIKEN cDNA 9330136K24 gene	ncRNA
chr5	113771383	113772005	+	989	NA	non-coding (NR_151532, exon 1 of 17)	non-coding (NR_151532, exon 1 of 17)	706	NM_001356621	53890	Mm.29594	NM_016926	ENSMUSG00000018974	Sart3	AU045857|mKIAA0156	squamous cell carcinoma antigen recognized by T cells 3	protein-coding
chr4	142014809	142015672	+	902	NA	Intergenic	(TG)n|Simple_repeat|Simple_repeat	-2658	NR_131014	78917	Mm.139995	NR_131014	ENSMUSG00000085761	4930455G09Rik	-	RIKEN cDNA 4930455G09 gene	ncRNA
chr11	82764006	82764703	+	1000	NA	promoter-TSS (NM_025884)	promoter-TSS (NM_025884)	9	NM_025884	66983	Mm.29622	NM_025884	ENSMUSG00000046010	Zfp830	2410003C20Rik|AV301118|AW048207|Ccdc16|Omcg1|Znf830	zinc finger protein 830	protein-coding
chr2	156065129	156066053	+	641	NA	exon (NM_139151, exon 1 of 12)	exon (NM_139151, exon 1 of 12)	378	NM_139151	245865	Mm.330713	NM_139151	ENSMUSG00000038180	Spag4	1700041K21Rik|MNCb-0953|Sun4|mKIAA4118	sperm associated antigen 4	protein-coding
chr2	158137943	158138161	+	585	NA	intron (NM_009373, intron 3 of 12)	intron (NM_009373, intron 3 of 12)	8340	NM_009373	21817	Mm.330731	NM_009373	ENSMUSG00000037820	Tgm2	G[a]h|TG2|TGase2|tTG|tTGas	transglutaminase 2, C polypeptide	protein-coding
chr5	135250980	135251414	+	887	NA	promoter-TSS (NM_010246)	promoter-TSS (NM_010246)	-150	NM_010246	14371	Mm.6256	NM_010246	ENSMUSG00000049551	Fzd9	Fz9|mfz9	frizzled class receptor 9	protein-coding
chr10	80386355	80388024	+	881	NA	exon (NM_198615, exon 1 of 2)	exon (NM_198615, exon 1 of 2)	462	NM_198615	237400	Mm.268389	NM_198615	ENSMUSG00000048696	Mex3d	BC059858|Rkhd1	mex3 RNA binding family member D	protein-coding
chr10	107858767	107859008	+	654	NA	intron (NM_001370989, intron 22 of 57)	intron (NM_001370989, intron 22 of 57)	53492	NM_001177567	628870	Mm.336090	NM_001177567	ENSMUSG00000091455	Otogl	EG628870|Gm6924	otogelin-like	protein-coding
chr6	13838573	13838873	+	776	NA	5' UTR (NM_001330667, exon 2 of 3)	5' UTR (NM_001330667, exon 2 of 3)	1219	NM_145066	64450	Mm.167625	NM_145066	ENSMUSG00000048216	Gpr85	2900026B03Rik	G protein-coupled receptor 85	protein-coding
chr2	151749567	151749946	+	566	NA	non-coding (NR_138569, exon 2 of 3)	non-coding (NR_138569, exon 2 of 3)	1709	NR_138569	75283	Mm.195735	NM_029235		4930556L07Rik	1700020P01Rik|4930593I08Rik	RIKEN cDNA 4930556L07 gene	ncRNA
chr17	80180082	80180305	+	578	NA	intron (NM_176963, intron 4 of 6)	intron (NM_176963, intron 4 of 6)	14775	NR_162791	114483355		NR_162791		Mir12189	mmu-mir-12189	microRNA mir-12189	ncRNA
chr15	76307251	76307479	+	591	NA	promoter-TSS (NM_153122)	promoter-TSS (NM_153122)	-76	NM_153122	75475	Mm.322738	NM_153122	ENSMUSG00000022562	Oplah	1700010G02Rik|5-OPase	5-oxoprolinase (ATP-hydrolysing)	protein-coding
chr11	102880894	102881328	+	571	NA	promoter-TSS (NM_001109995)	promoter-TSS (NM_001109995)	-113	NM_028492	73293	Mm.67659	NM_028492	ENSMUSG00000020930	Ccdc103	1700039D13Rik	coiled-coil domain containing 103	protein-coding
chr13	104109222	104110181	+	1000	NA	promoter-TSS (NM_029447)	promoter-TSS (NM_029447)	-40	NM_144838	218544	Mm.44416	NM_144838	ENSMUSG00000042743	Sgtb	C630001O05Rik	small glutamine-rich tetratricopeptide repeat (TPR)-containing, beta	protein-coding
chr17	35838165	35838471	+	682	NA	promoter-TSS (NM_011655)	promoter-TSS (NM_011655)	-17	NM_011655	22154	Mm.273538	NM_011655	ENSMUSG00000001525	Tubb5	AA408537|AI596182|B130022C14Rik|M(beta)5	tubulin, beta 5 class I	protein-coding
chr11	69901516	69902199	+	679	NA	promoter-TSS (NM_001316698)	promoter-TSS (NM_001316698)	41	NM_001291118	216860	Mm.268347	NM_001013414	ENSMUSG00000047284	Neurl4	-	neuralized E3 ubiquitin protein ligase 4	protein-coding
chr2	113305419	113305642	+	548	NA	Intergenic	MTD|LTR|ERVL-MaLR	19798	NM_029232	75275	Mm.159484	NM_029232	ENSMUSG00000041255	Tmco5b	4930563P21Rik	transmembrane and coiled-coil domains 5B	protein-coding
chr2	162660461	162661490	+	684	NA	promoter-TSS (NR_033569)	promoter-TSS (NR_033569)	172	NM_001291150	19281	Mm.235807	NM_021464	ENSMUSG00000053141	Ptprt	R-PTP-T|RPTP-rfo|RPTP-rho|RPTPmam4|RPTPrho|mKIAA0283|mRPTPrho	protein tyrosine phosphatase, receptor type, T	protein-coding
chr17	94749523	94750374	+	1000	NA	promoter-TSS (NM_176917)	promoter-TSS (NM_176917)	71	NM_176917	76781	Mm.139146	NM_176917	ENSMUSG00000055660	Mettl4	2410198H06Rik|A730091E08Rik|AV296509|HsT661	methyltransferase like 4	protein-coding
chrX	52165128	52165778	+	801	NA	promoter-TSS (NM_008150)	promoter-TSS (NM_008150)	-530	NM_008150	14735	Mm.1528	NM_008150	ENSMUSG00000031119	Gpc4	9530073D23Rik|AF311610|AI385680|AI661372|K-glypican	glypican 4	protein-coding
chr12	109417323	109418413	+	669	NA	Intergenic	Intergenic	-34955	NR_033813	13386	Mm.157069	NM_010052	ENSMUSG00000040856	Dlk1	AW742678|DLK-1|DlkI|FA1|Ly107|Peg9|SCP1|ZOG|pG2|pref-1	delta like non-canonical Notch ligand 1	protein-coding
chr12	16667173	16667515	+	596	NA	Intergenic	Intergenic	13874	NM_001361702	18217	Mm.281715	NM_008747	ENSMUSG00000020591	Ntsr2	NT-R-2|NT2R|NTR2|NTRL	neurotensin receptor 2	protein-coding
chr13	60177474	60177867	+	806	NA	promoter-TSS (NM_008086)	promoter-TSS (NM_008086)	-135	NM_008086	14451	Mm.22701	NM_008086	ENSMUSG00000052957	Gas1	AW554192|Gas-1	growth arrest specific 1	protein-coding
chr4	52438817	52439520	+	1000	NA	promoter-TSS (NM_001301412)	promoter-TSS (NM_001301412)	-53	NM_001301412	14211	Mm.2999	NM_008017	ENSMUSG00000028312	Smc2	5730502P04Rik|AI255214|AW545314|CAP-E|CAPE|Fin16|SMC-2|Smc2l1	structural maintenance of chromosomes 2	protein-coding
chr2	27858315	27859082	+	673	NA	Intergenic	Intergenic	-27727	NM_015734	12831	Mm.7281	NM_015734	ENSMUSG00000026837	Col5a1	AI413331	collagen, type V, alpha 1	protein-coding
chr3	95855565	95856049	+	756	NA	promoter-TSS (NM_027541)	promoter-TSS (NM_027541)	-54	NM_027541	70767	Mm.279872	NM_027541	ENSMUSG00000015748	Prpf3	3632413F13Rik	pre-mRNA processing factor 3	protein-coding
chr2	136387501	136388002	+	600	NA	5' UTR (NM_001360382, exon 1 of 11)	5' UTR (NM_001360382, exon 1 of 11)	216	NM_172858	241656	Mm.131572	NM_172858	ENSMUSG00000039913	Pak7	2900083L08Rik|PAK-5|PAK-7|Pak5	p21 (RAC1) activated kinase 7	protein-coding
chr17	27839897	27840251	+	603	NA	promoter-TSS (NM_011432)	promoter-TSS (NM_011432)	-13	NM_011432	20630	Mm.103949	NM_011432	ENSMUSG00000024217	Snrpc	Snrp1c|U1-C|U1C	U1 small nuclear ribonucleoprotein C	protein-coding
chr17	27290230	27290595	+	999	NA	Intergenic	Intergenic	26683	NR_106073	102465700		NR_106073	ENSMUSG00000105142	Mir7214	mmu-mir-7214	microRNA 7214	ncRNA
chr6	72185837	72186617	+	695	NA	Intergenic	Intergenic	49350	NM_153778	71093	Mm.87449	NM_153778	ENSMUSG00000037621	Atoh8	4933425C05Rik|Hath6|Math6|bHLHa21|okadin	atonal bHLH transcription factor 8	protein-coding
chr5	33657403	33658844	+	1000	NA	promoter-TSS (NM_001356983)	promoter-TSS (NM_001356983)	-5	NM_001310541	21335	Mm.379024	NM_011524	ENSMUSG00000037313	Tacc3	Aint|C86661|Eric1	transforming, acidic coiled-coil containing protein 3	protein-coding
chr15	78428510	78429248	+	589	NA	intron (NR_110357, intron 1 of 6)	CpG	315	NR_110357	72844	Mm.390816	NM_001081367	ENSMUSG00000033287	Kctd17	2900008M13Rik|AA414907|AW742389|N28155	potassium channel tetramerisation domain containing 17	protein-coding
chr1	161170731	161171012	+	580	NA	TTS (NM_028664)	TTS (NM_028664)	-11557	NM_001195189	100502590	Mm.449990	NM_001195189	ENSMUSG00000049160	Tex50	4930469G21Rik	testis expressed 50	protein-coding
chr8	33385068	33386481	+	1000	NA	promoter-TSS (NM_001122822)	promoter-TSS (NM_001122822)	-247	NM_011721	22427	Mm.228805	NM_011721	ENSMUSG00000031583	Wrn	AI846146	Werner syndrome RecQ like helicase	protein-coding
chr13	53285580	53286061	+	616	NA	exon (NM_013846, exon 1 of 9)	exon (NM_013846, exon 1 of 9)	304	NM_013846	26564	Mm.342774	NM_013846	ENSMUSG00000021464	Ror2	Ntrkr2	receptor tyrosine kinase-like orphan receptor 2	protein-coding
chr2	31469710	31470915	+	1000	NA	promoter-TSS (NM_007494)	promoter-TSS (NM_007494)	4	NR_002687	432466	Mm.333323	NR_002687	ENSMUSG00000046687	Gm5424	EG432466	argininosuccinate synthase pseudogene	pseudo
chr16	4029270	4029980	+	1000	NA	Intergenic	Intergenic	-7411	NM_001357143	13419	Mm.291048	NM_010061	ENSMUSG00000005980	Dnase1	AI788650|DNaseI|Dnl1	deoxyribonuclease I	protein-coding
chr4	129417617	129418086	+	686	NA	Intergenic	Intergenic	22967	NM_153541	215627	Mm.428660	NM_153541	ENSMUSG00000048485	Zbtb8b	AV220464|BC023839|BOZF1|Zbtb8	zinc finger and BTB domain containing 8b	protein-coding

## Sheet: Sun dKO-specific genes ATAC pea
Chr	Start	End	Strand	Peak Score	Focus Ratio/Region Size	Annotation	Detailed Annotation	Distance to TSS	Nearest PromoterID	Entrez ID	Nearest Unigene	Nearest Refseq	Nearest Ensembl	Gene Name	Gene Alias	Gene Description	Gene Type
chr10	102340939	102341438	+	573	NA	intron (NM_001162369, intron 1 of 5)	Lx|LINE|L1	-33249	NM_026243	67569	Mm.25252	NM_026243	ENSMUSG00000019888	Mgat4c	9130411I17Rik|GntIVh	MGAT4 family, member C	protein-coding
chr10	103367461	103369395	+	819	NA	intron (NM_001252330, intron 1 of 11)	intron (NM_001252330, intron 1 of 11)	620	NM_001252330	103098	Mm.458408	NM_175328	ENSMUSG00000019894	Slc6a15	AA536730|AI326450|AI326451|v7-3	solute carrier family 6 (neurotransmitter transporter), member 15	protein-coding
chr10	105485854	105486120	+	766	NA	intron (NM_177368, intron 1 of 11)	intron (NM_177368, intron 1 of 11)	88492	NM_177368	278279	Mm.25225	NM_177368	ENSMUSG00000036019	Tmtc2	8430438D04Rik|D330034A10Rik	transmembrane and tetratricopeptide repeat containing 2	protein-coding
chr10	106775320	106775985	+	1000	NA	intron (NM_001359678, intron 4 of 30)	RMER6C|LTR|ERVK	143124	NM_001359693	327814	Mm.391424	NM_177373	ENSMUSG00000053825	Ppfia2	5330438O12|B230207K17Rik|E130120L08Rik|mKIAA4112	protein tyrosine phosphatase, receptor type, f polypeptide (PTPRF), interacting protein (liprin), alpha 2	protein-coding
chr10	10688892	10689847	+	915	NA	exon (NM_016976, exon 9 of 9)	exon (NM_016976, exon 9 of 9)	-61677	NR_046010	78056	Mm.271285	NR_046010	ENSMUSG00000112730	4930567K20Rik	1700038H22Rik	RIKEN cDNA 4930567K20 gene	ncRNA
chr10	108649172	108649565	+	734	NA	intron (NM_001252342, intron 4 of 10)	intron (NM_001252342, intron 4 of 10)	50792	NM_203660	368203	Mm.452758	NM_203660	ENSMUSG00000112039	Gm5136	C6.1AL|EG368203	predicted gene 5136	protein-coding
chr10	111842959	111843257	+	1000	NA	Intergenic	Intergenic	31268	NR_046029	629206	Mm.391444	NR_046029	ENSMUSG00000112533	Gm20758	-	predicted gene, 20758	ncRNA
chr10	111995846	111996139	+	554	NA	intron (NM_028608, intron 1 of 5)	L1MA7|LINE|L1	1272	NM_028608	73690	Mm.173790	NM_028608	ENSMUSG00000056888	Glipr1	2410114O14Rik|RTVP-1|RTVP1|mRTVP-1	GLI pathogenesis-related 1 (glioma)	protein-coding
chr10	112059860	112060270	+	598	NA	promoter-TSS (NM_027018)	promoter-TSS (NM_027018)	-124	NM_027018	69286	Mm.47058	NM_027018	ENSMUSG00000020213	Glipr1l1	1700011E04Rik	GLI pathogenesis-related 1 like 1	protein-coding
chr10	115184675	115185112	+	682	NA	5' UTR (NM_173391, exon 1 of 11)	5' UTR (NM_173391, exon 1 of 11)	129	NM_173391	216343	Mm.31597	NM_173391	ENSMUSG00000006764	Tph2	AU043594|Ntph	tryptophan hydroxylase 2	protein-coding
chr10	116707023	116707562	+	693	NA	Intergenic	MIRb|SINE|MIR	21885	NR_045345	72286	Mm.396207	NR_045345	ENSMUSG00000100198	1700030O20Rik	-	RIKEN cDNA 1700030O20 gene	ncRNA
chr10	118787263	118787717	+	546	NA	Intergenic	Intergenic	-71764	NR_155867	102636202	Mm.407006	NR_155867		Gm33337	-	predicted gene, 33337	ncRNA
chr10	118987825	118988657	+	870	NA	Intergenic	Intergenic	-61098	NR_110482	216377	Mm.208936	NR_110482	ENSMUSG00000112854	Gm38403	C230029M16	predicted gene, 38403	ncRNA
chr10	119116928	119117490	+	906	NA	Intergenic	Intergenic	24304	NR_045348	73400	Mm.416864	NR_045348	ENSMUSG00000100681	1700064J06Rik	-	RIKEN cDNA 1700064J06 gene	ncRNA
chr10	119713657	119714070	+	935	NA	intron (NM_133442, intron 1 of 21)	intron (NM_133442, intron 1 of 21)	47836	NR_045359	75321	Mm.402041	NR_045359	ENSMUSG00000084764	Grip1os2	4930564G21Rik	glutamate receptor interacting protein 1, opposite strand 2	ncRNA
chr10	119876542	119877262	+	1000	NA	intron (NM_001358811, intron 1 of 23)	intron (NM_001358811, intron 1 of 23)	-24512	NR_131760	78105	Mm.399086	NR_131760	ENSMUSG00000085418	Grip1os1	4930404E01Rik|4930483C13Rik	glutamate receptor interacting protein 1, opposite strand 1	ncRNA
chr10	120208599	120209108	+	741	NA	promoter-TSS (NM_026617)	promoter-TSS (NM_026617)	27	NM_026617	68212	Mm.157426	NM_026617	ENSMUSG00000020225	Tmbim4	0610007H07Rik|AU022431	transmembrane BAX inhibitor motif containing 4	protein-coding
chr10	120422003	120422391	+	996	NA	intron (NM_010441, intron 3 of 4)	intron (NM_010441, intron 3 of 4)	25913	NR_030434	791076		NR_030434	ENSMUSG00000076448	Mir763	Mirn763|mir-763|mmu-mir-763	microRNA 763	ncRNA
chr10	121173765	121174354	+	723	NA	Intergenic	Intergenic	28590	NR_152796	74647	Mm.370609	NR_152796	ENSMUSG00000112846	4930432O09Rik	-	RIKEN cDNA 4930432O09 gene	ncRNA
chr10	122448439	122449755	+	596	NA	exon (NM_016847, exon 1 of 2)	exon (NM_016847, exon 1 of 2)	598	NM_016847	54140	Mm.4351	NM_016847	ENSMUSG00000020123	Avpr1a	AVPR|Avpr1|V1a|V1aR	arginine vasopressin receptor 1A	protein-coding
chr10	122678444	122679895	+	872	NA	promoter-TSS (NR_106182)	promoter-TSS (NR_106182)	-146	NR_106182	102466884		NR_106182	ENSMUSG00000099225	Mir8104	Gm27380|mmu-mir-8104	microRNA 8104	ncRNA
chr10	127041122	127042262	+	1000	NA	promoter-TSS (NM_010792)	promoter-TSS (NM_010792)	-240	NM_010792	17299	Mm.251593	NM_010792	ENSMUSG00000006732	Mettl1	2810012D02Rik	methyltransferase like 1	protein-coding
chr10	127049749	127050383	+	545	NA	exon (NM_010009, exon 4 of 9)	exon (NM_010009, exon 4 of 9)	1820	NM_010009	13115	Mm.6216	NM_010009	ENSMUSG00000006724	Cyp27b1	Cp2b|Cyp1|Cyp27b|Cyp40|P450c1|Pddr|Vdd1|Vddr|VddrI|Vdr	cytochrome P450, family 27, subfamily b, polypeptide 1	protein-coding
chr10	127070165	127070462	+	980	NA	promoter-TSS (NM_025982)	promoter-TSS (NM_025982)	-52	NM_025982	67125	Mm.35650	NM_025982	ENSMUSG00000006736	Tspan31	2700085A14Rik|AW742554|Sas	tetraspanin 31	protein-coding
chr10	127188495	127189202	+	907	NA	promoter-TSS (NM_001358557)	promoter-TSS (NM_001358557)	-76	NM_001358557	52666	Mm.272230	NM_028027	ENSMUSG00000019467	Arhgef25	2410008H17Rik|D10Ertd610e|GEFT	Rho guanine nucleotide exchange factor (GEF) 25	protein-coding
chr10	127338891	127340171	+	1000	NA	intron (NM_010296, intron 2 of 12)	intron (NM_010296, intron 2 of 12)	2048	NM_010296	14632	Mm.391450	NM_010296	ENSMUSG00000025407	Gli1	AV235269|Zfp-5|Zfp5	GLI-Kruppel family member GLI1	protein-coding
chr10	127350258	127350937	+	600	NA	exon (NM_008382, exon 2 of 2)	exon (NM_008382, exon 2 of 2)	1251	NM_008382	16326	Mm.3510	NM_008382	ENSMUSG00000047492	Inhbe	-	inhibin beta-E	protein-coding
chr10	127562879	127563381	+	668	NA	intron (NM_008512, intron 42 of 88)	intron (NM_008512, intron 42 of 88)	-28571	NM_183297	104080	Mm.437200	NM_183297	ENSMUSG00000040258	Nxph4	1110036M10Rik|AI851051	neurexophilin 4	protein-coding
chr10	128176510	128176766	+	584	NA	promoter-TSS (NM_019711)	promoter-TSS (NM_019711)	-70	NM_019711	56516	Mm.42247	NM_019711	ENSMUSG00000040043	Rbms2	2610315E04Rik|Scr3	RNA binding motif, single stranded interacting protein 2	protein-coding
chr10	128225884	128226266	+	711	NA	exon (NM_008600, exon 1 of 4)	exon (NM_008600, exon 1 of 4)	265	NM_008600	17339	Mm.31625	NM_008600	ENSMUSG00000025389	Mip	Aqp0|Cat|Cts|Hfi|Lop|MIP26|MP26|Svl|shrivelled	major intrinsic protein of lens fiber	protein-coding
chr10	128584316	128584736	+	852	NA	promoter-TSS (NR_105882)	promoter-TSS (NR_105882)	-29	NR_105882	102465553		NR_105882	ENSMUSG00000098592	Mir6917	Gm27633|mmu-mir-6917	microRNA 6917	ncRNA
chr10	128626756	128626972	+	832	NA	promoter-TSS (NM_013765)	promoter-TSS (NM_013765)	-358	NM_013765	27370	Mm.32118	NM_013765	ENSMUSG00000025362	Rps26	-	ribosomal protein S26	protein-coding
chr10	128715501	128716604	+	542	NA	exon (NM_021882, exon 6 of 11)	exon (NM_021882, exon 6 of 11)	9794	NM_021882	20431	Mm.16756	NM_021882	ENSMUSG00000025359	Pmel	D10H12S53E|D12S53Eh|Pmel17|Si|Silv|gp100|gp87	premelanosome protein	protein-coding
chr10	128996553	128997115	+	698	NA	Intergenic	Intergenic	6920	NM_146861	18373	Mm.377111	NM_146861	ENSMUSG00000069430	Olfr9	MOR269-3	olfactory receptor 9	protein-coding
chr10	129303647	129304699	+	995	NA	Intergenic	RMER1A|Other|Other	-17452	NM_146284	258281	Mm.377412	NM_146284	ENSMUSG00000049573	Olfr780	MOR114-12	olfactory receptor 780	protein-coding
chr10	130412249	130413835	+	844	NA	Intergenic	Intergenic	16570	NM_001102602	623734	Mm.469840	NM_001102602	ENSMUSG00000092048	Vmn2r85	EG623734	vomeronasal 2, receptor 85	protein-coding
chr10	13090247	13091325	+	563	NA	promoter-TSS (NR_131912)	promoter-TSS (NR_131912)	-46	NM_009538	22634	Mm.287857	NM_009538	ENSMUSG00000019817	Plagl1	2610311E24Rik|Lot1|Zac1	pleiomorphic adenoma gene-like 1	protein-coding
chr10	17347827	17348492	+	673	NA	Intergenic	Intergenic	-252377	NR_038020	100504235	Mm.84044	NR_038020	ENSMUSG00000101969	Gm20125	-	predicted gene, 20125	ncRNA
chr10	17760859	17761321	+	598	NA	Intergenic	Intergenic	-35129	NM_138628	378431	Mm.283493	NM_138628	ENSMUSG00000039891	Txlnb	2310001N14Rik|Mdp77	taxilin beta	protein-coding
chr10	19356868	19357476	+	641	NA	exon (NM_053008, exon 1 of 1)	exon (NM_053008, exon 1 of 1)	633	NM_053008	94222	Mm.156946	NM_053008	ENSMUSG00000045591	Olig3	Bhlhb7|bHLHe20|oligo3	oligodendrocyte transcription factor 3	protein-coding
chr10	20568739	20569226	+	628	NA	intron (NM_013875, intron 2 of 12)	intron (NM_013875, intron 2 of 12)	-20654	NM_001347366	29863	Mm.425617	NM_013875	ENSMUSG00000019990	Pde7b	-	phosphodiesterase 7B	protein-coding
chr10	22058118	22059272	+	956	NA	Intergenic	CpG	9384	NM_053264	114671	Mm.288194	NM_053264	ENSMUSG00000069712	4930444G20Rik	-	RIKEN cDNA 4930444G20 gene	protein-coding
chr10	22169144	22169618	+	844	NA	intron (NM_001359809, intron 1 of 7)	intron (NM_001359809, intron 1 of 7)	-4116	NM_198193	379043	Mm.439724	NM_198193	ENSMUSG00000053219	Raet1e	-	retinoic acid early transcript 1E	protein-coding
chr10	22357464	22357751	+	787	NA	intron (NM_009018, intron 6 of 6)	ORR1D1|LTR|ERVL-MaLR	-4287	NM_020030	56554	Mm.458004	NM_020030	ENSMUSG00000078452	Raet1d	RAE-1delta	retinoic acid early transcript delta	protein-coding
chr10	24589354	24589708	+	635	NA	intron (NR_163910, intron 1 of 4)	intron (NR_163910, intron 1 of 4)	-5911	NM_010217	14219	Mm.390287	NM_010217	ENSMUSG00000019997	Ccn2	Ctgf|Fisp12|Hcs24|fisp-12	cellular communication network factor 2	protein-coding
chr10	24711539	24712447	+	964	NA	5' UTR (NM_001308329, exon 1 of 25)	5' UTR (NM_001308329, exon 1 of 25)	166	NM_008813	18605	Mm.27254	NM_008813	ENSMUSG00000037370	Enpp1	4833416E15Rik|AI428932|C76301|CD203c|E-NPP 1|E-NPP1|Ly-41|M6S1|NPP1|Npps|PC-1|Pca|Pca-1|Pdnp1|ttw|twy	ectonucleotide pyrophosphatase/phosphodiesterase 1	protein-coding
chr10	26250231	26250740	+	710	NA	intron (NM_001013766, intron 6 of 7)	B4|SINE|B4	20778	NM_001013766	268288	Mm.213322	NM_001013766	ENSMUSG00000051354	Samd3	Gm623	sterile alpha motif domain containing 3	protein-coding
chr10	26564541	26564879	+	753	NA	Intergenic	Intergenic	109941	NR_033633	667572	Mm.482728	NR_033633	ENSMUSG00000098179	Gm8709	EG667572	glyceraldehyde-3-phosphate dehydrogenase pseudogene	pseudo
chr10	27632957	27633763	+	1000	NA	Intergenic	Intergenic	-16418	NM_008481	16773	Mm.256087	NM_008481	ENSMUSG00000019899	Lama2	5830440B04|dy|mKIAA4087|mer|merosin	laminin, alpha 2	protein-coding
chr10	29535465	29535915	+	825	NA	5' UTR (NM_028351, exon 1 of 5)	5' UTR (NM_028351, exon 1 of 5)	177	NM_028351	72780	Mm.45191	NM_028351	ENSMUSG00000019880	Rspo3	2810459H04Rik|AW742308|Cristin1|Thsd2	R-spondin 3	protein-coding
chr10	32889648	32891044	+	818	NA	promoter-TSS (NM_001025286)	promoter-TSS (NM_001025286)	-431	NM_001013411	432450	Mm.49665	NM_001013411	ENSMUSG00000069670	Nkain2	6330571D19Rik|AW455467|Tcba1	Na+/K+ transporting ATPase interacting 2	protein-coding
chr10	34096433	34096737	+	824	NA	promoter-TSS (NM_178908)	promoter-TSS (NM_178908)	-66	NM_178908	103511	Mm.66334	NM_178908	ENSMUSG00000049872	Calhm5	BB146404|Fam26e	calcium homeostasis modulator family member 5	protein-coding
chr10	34127286	34127947	+	795	NA	exon (NM_175449, exon 1 of 2)	exon (NM_175449, exon 1 of 2)	356	NM_175449	215900	Mm.34479	NM_175449	ENSMUSG00000046031	Calhm6	A630077B13Rik|Fam26f	calcium homeostasis modulator family member 6	protein-coding
chr10	38112038	38112326	+	978	NA	Intergenic	Intergenic	-63592	NR_131035	75877	Mm.402094	NR_131035	ENSMUSG00000111234	4930591E09Rik	-	RIKEN cDNA 4930591E09 gene	ncRNA
chr10	39731089	39733152	+	1000	NA	promoter-TSS (NM_011264)	promoter-TSS (NM_011264)	-40	NM_011264	19714	Mm.439723	NM_011264	ENSMUSG00000019841	Rev3l	Rev|Rev3|Sez4	REV3 like, DNA directed polymerase zeta catalytic subunit	protein-coding
chr10	39926612	39927282	+	707	NA	promoter-TSS (NR_160807)	promoter-TSS (NR_160807)	-11	NR_160807	72045	Mm.235981	NM_001163503	ENSMUSG00000039339	Mfsd4b2-ps	2010001E11Rik|Mfsd4b2|Naglt1b	major facilitator superfamily domain containing 4B2, pseudogene	pseudo
chr10	40511261	40511969	+	843	NA	Intergenic	Intergenic	-58747	NM_027572	70840	Mm.332570	NM_027572	ENSMUSG00000019834	Slc22a16	4921504E14Rik|CT2|FLIPT2|OCT6|OKB1	solute carrier family 22 (organic cation transporter), member 16	protein-coding
chr10	4120706	4121661	+	1000	NA	intron (NM_172308, intron 26 of 27)	intron (NM_172308, intron 26 of 27)	91937	NR_152620	102632515	Mm.416995	NR_152620	ENSMUSG00000111266	Gm30570	-	predicted gene, 30570	ncRNA
chr10	41490022	41490712	+	1000	NA	promoter-TSS (NM_028430)	promoter-TSS (NM_028430)	-27	NM_009213	20598	Mm.953	NM_009213	ENSMUSG00000019822	Smpd2	AW108287|nSMase|nSMase1	sphingomyelin phosphodiesterase 2, neutral	protein-coding
chr10	4266401	4266868	+	1000	NA	exon (NM_031185, exon 1 of 4)	exon (NM_031185, exon 1 of 4)	305	NM_031185	83397	Mm.27481	NM_031185	ENSMUSG00000038587	Akap12	AI317366|SSeCKS|Srcs5|Tsga12	A kinase (PRKA) anchor protein (gravin) 12	protein-coding
chr10	43021020	43022719	+	829	NA	exon (NM_175407, exon 6 of 7)	exon (NM_175407, exon 6 of 7)	-30707	NR_153349	327749	Mm.428887	NR_153349		Gm5079	C230040G06	predicted gene 5079	ncRNA
chr10	43174157	43175656	+	889	NA	promoter-TSS (NM_175407)	promoter-TSS (NM_175407)	207	NR_102361	74530	Mm.415375	NM_172419	ENSMUSG00000045008	9030612E09Rik	-	RIKEN cDNA 9030612E09 gene	ncRNA
chr10	43657562	43658010	+	925	NA	Intergenic	Intergenic	64359	NR_033558	414125	Mm.244305	NR_033558	ENSMUSG00000075184	F930017D23Rik	F830002L21Rik	RIKEN cDNA F930017D23 gene	ncRNA
chr10	43689754	43690289	+	547	NA	Intergenic	Intergenic	-56137	NR_040581	69443	Mm.484042	NR_040581	ENSMUSG00000111422	1700027J07Rik	-	RIKEN cDNA 1700027J07 gene	ncRNA
chr10	44381343	44381664	+	788	NA	Intergenic	Intergenic	21827	NR_035450	100316688		NR_035450	ENSMUSG00000089260	Mir1929	mir-1929|mmu-mir-1929	microRNA 1929	ncRNA
chr10	45289187	45289855	+	987	NA	promoter-TSS (NR_155869)	promoter-TSS (NR_155869)	-105	NR_155869	102638854		NR_155869		Gm15934	-	predicted gene 15934	ncRNA
chr10	45318974	45319362	+	742	NA	TTS (NM_024286)	TTS (NM_024286)	-16567	NM_024285	23828	Mm.332793	NM_024285	ENSMUSG00000071317	Bves	Pop1|Popdc1|mBVES	blood vessel epicardial substance	protein-coding
chr10	52704704	52705051	+	592	NA	intron (NM_178675, intron 1 of 7)	intron (NM_178675, intron 1 of 7)	14376	NM_178675	215085	Mm.338690	NM_178675	ENSMUSG00000038602	Slc35f1	Duf6|E130016L02	solute carrier family 35, member F1	protein-coding
chr10	58746447	58747060	+	756	NA	Intergenic	Intergenic	50008	NR_033565	103505	Mm.50261	NR_033565	ENSMUSG00000091526	BB019430	-	expressed sequence BB019430	ncRNA
chr10	60125699	60126420	+	626	NA	promoter-TSS (NR_105871)	promoter-TSS (NR_105871)	-717	NR_105871	102465546		NR_105871	ENSMUSG00000105468	Mir6906	mmu-mir-6906	microRNA 6906	ncRNA
chr10	61175531	61176112	+	959	NA	exon (NM_023064, exon 2 of 4)	exon (NM_023064, exon 2 of 4)	559	NM_023064	65971	Mm.30227	NM_023064	ENSMUSG00000020096	Tbata	1700021K02Rik|AI428928|Spatial|Titest	thymus, brain and testes associated	protein-coding
chr10	61286161	61286887	+	1000	NA	Intergenic	LTR72_RN|LTR|ERV1	-11312	NM_011073	18646	Mm.240313	NM_011073	ENSMUSG00000037202	Prf1	Pfn|Pfp|Prf-1	perforin 1 (pore forming protein)	protein-coding
chr10	61669934	61670223	+	1000	NA	intron (NM_026438, intron 8 of 10)	ORR1C2|LTR|ERVL-MaLR	-10207	NM_009120	20224	Mm.391794	NM_009120	ENSMUSG00000020088	Sar1a	1600019H17Rik|Sara|Sara1	secretion associated Ras related GTPase 1A	protein-coding
chr10	62261168	62261751	+	760	NA	intron (NM_009314, intron 3 of 4)	intron (NM_009314, intron 3 of 4)	9021	NM_009314	21337	Mm.8054	NM_009314	ENSMUSG00000020081	Tacr2	Nk2r|Skr|Tac2r	tachykinin receptor 2	protein-coding
chr10	62449290	62450612	+	668	NA	promoter-TSS (NM_181423)	promoter-TSS (NM_181423)	-213	NM_001359806	338359	Mm.235898	NM_181423	ENSMUSG00000020079	Supv3l1	6330443E10Rik	suppressor of var1, 3-like 1 (S. cerevisiae)	protein-coding
chr10	62549623	62550378	+	552	NA	Intergenic	Intergenic	-22555	NM_001358965	19073	Mm.338790	NM_011157	ENSMUSG00000020077	Srgn	Prg|Prg1|Sgc	serglycin	protein-coding
chr10	63099935	63100514	+	643	NA	exon (NM_001364648, exon 1 of 2)	exon (NM_001364648, exon 1 of 2)	439	NM_016864	53404	Mm.228661	NM_016864	ENSMUSG00000036816	Atoh7	Math5|bHLHa13	atonal bHLH transcription factor 7	protein-coding
chr10	63177305	63177830	+	1000	NA	intron (NM_182992, intron 2 of 19)	intron (NM_182992, intron 2 of 19)	26385	NM_182992	68802	Mm.259767	NM_182992	ENSMUSG00000020067	Mypn	1110056A04Rik|9830112J03|AI853556|mKIAA4170	myopalladin	protein-coding
chr10	64861531	64861783	+	695	NA	intron (NM_177612, intron 14 of 17)	RMER1A|Other|Other	258710	NR_152621	102632700		NR_152621	ENSMUSG00000100528	Gm28881	-	predicted gene 28881	ncRNA
chr10	66354028	66354601	+	1000	NA	Intergenic	Intergenic	209018	NR_131070	77198	Mm.107617	NR_131070	ENSMUSG00000112210	4930407I19Rik	-	RIKEN cDNA 4930407I19 gene	ncRNA
chr10	67610639	67611050	+	688	NA	Intergenic	Intergenic	-38885	NR_155444	105245193	Mm.72938	NR_155444		4930563J15Rik	-	RIKEN cDNA 4930563J15 gene	ncRNA
chr10	68723581	68724351	+	723	NA	exon (NM_177794, exon 1 of 6)	exon (NM_177794, exon 1 of 6)	220	NM_177794	327766	Mm.2479	NM_177794	ENSMUSG00000060044	Tmem26	3230401A06|AI195372	transmembrane protein 26	protein-coding
chr10	71130231	71130849	+	746	NA	intron (NM_001347189, intron 1 of 21)	RMER1B|Other|Other	29150	NM_031397	83675	Mm.286834	NM_031397	ENSMUSG00000014329	Bicc1	Bic-C|bpk|jcpk	BicC family RNA binding protein 1	protein-coding
chr10	71218261	71218579	+	647	NA	Intergenic	Intergenic	16675	NR_131003	78638	Mm.71171	NR_131003	ENSMUSG00000112028	1700113B09Rik	-	RIKEN cDNA 1700113B09 gene	ncRNA
chr10	7391125	7391443	+	557	NA	Intergenic	CpG	82193	NM_029975	77777	Mm.442442	NM_029975	ENSMUSG00000079685	Ulbp1	A430108B07Rik|MULT1	UL16 binding protein 1	protein-coding
chr10	75036999	75037566	+	684	NA	promoter-TSS (NM_001359272)	promoter-TSS (NM_001359272)	56	NM_001359272	76877	Mm.133593	NM_029781	ENSMUSG00000020175	Rab36	6330593L16Rik|AW047545	RAB36, member RAS oncogene family	protein-coding
chr10	75316489	75317176	+	622	NA	promoter-TSS (NM_009630)	promoter-TSS (NM_009630)	-45	NM_009630	11540	Mm.333734	NM_009630	ENSMUSG00000020178	Adora2a	A2AAR|A2aR|AA2AR|ARA2A	adenosine A2a receptor	protein-coding
chr10	75832255	75833101	+	565	NA	exon (NM_010361, exon 3 of 5)	exon (NM_010361, exon 3 of 5)	2203	NM_010361	14872	Mm.24118	NM_010361	ENSMUSG00000033318	Gstt2	AI266894|Yrs|mGSTT2	glutathione S-transferase, theta 2	protein-coding
chr10	76117373	76118721	+	643	NA	Intergenic	RMER1B|Other|Other	-7029	NM_023219	64454	Mm.155678	NM_023219	ENSMUSG00000020226	Slc5a4b	2010104G07Rik|SAAT1|SGLT3-b|SGLT3b|pSGLT2	solute carrier family 5 (neutral amino acid transporters, system A), member 4b	protein-coding
chr10	77622039	77622701	+	1000	NA	promoter-TSS (NM_019803)	promoter-TSS (NM_019803)	49	NM_019803	22213	Mm.458125	NM_019803	ENSMUSG00000009293	Ube2g2	1110003O05Rik|D10Xrf369|UBC7|Ubc7p	ubiquitin-conjugating enzyme E2G 2	protein-coding
chr10	77901816	77903208	+	687	NA	promoter-TSS (NM_145152)	promoter-TSS (NM_145152)	24	NM_145152	237387	Mm.133301	NM_145152	ENSMUSG00000051652	Lrrc3	1300011L04Rik|C21orf102	leucine rich repeat containing 3	protein-coding
chr10	78317294	78317782	+	971	NA	intron (NM_053014, intron 2 of 9)	intron (NM_053014, intron 2 of 9)	22669	NR_106119	102465765		NR_106119	ENSMUSG00000098885	Mir7659	Gm27433|mmu-mir-7659	microRNA 7659	ncRNA
chr10	7832269	7832661	+	553	NA	promoter-TSS (NM_172785)	promoter-TSS (NM_172785)	-5	NM_172785	237256	Mm.140055	NM_172785	ENSMUSG00000039981	Zc3h12d	D730019B10Rik|TFL	zinc finger CCCH type containing 12D	protein-coding
chr10	78481422	78482521	+	787	NA	Intergenic	Intergenic	-17023	NM_172134	216134	Mm.206159	NM_172134	ENSMUSG00000032788	Pdxk	2310036D04Rik|AA119688|C77999	pyridoxal (pyridoxine, vitamin B6) kinase	protein-coding
chr10	78787766	78788033	+	673	NA	exon (NM_009200, exon 2 of 10)	exon (NM_009200, exon 2 of 10)	7403	NM_009200	20513	Mm.6257	NM_009200	ENSMUSG00000005357	Slc1a6	EAAT4	solute carrier family 1 (high affinity aspartate/glutamate transporter), member 6	protein-coding
chr10	79595311	79595656	+	986	NA	Intergenic	Intergenic	-8347	NM_199226	21830	Mm.89197	NM_011583	ENSMUSG00000020317	Theg	-	testicular haploid expressed gene	protein-coding
chr10	79613608	79614210	+	658	NA	5' UTR (NM_198614, exon 1 of 2)	5' UTR (NM_198614, exon 1 of 2)	109	NM_198614	237397	Mm.334207	NM_198614	ENSMUSG00000045912	C2cd4c	4932409I22Rik|Fam148c|Gm238	C2 calcium-dependent domain containing 4C	protein-coding
chr10	79854044	79855250	+	1000	NA	non-coding (NR_029447, exon 1 of 1)	non-coding (NR_029447, exon 1 of 1)	215	NM_001077363	19205	Mm.265610	NM_008956	ENSMUSG00000006498	Ptbp1	AA407203|AL033359|HNRPI|PTB-1|PTB2|PTB3|PTB4|Ptb|pPTB	polypyrimidine tract binding protein 1	protein-coding
chr10	79874224	79874901	+	628	NA	promoter-TSS (NR_033210)	promoter-TSS (NR_033210)	72	NM_181681	216152	Mm.29678	NM_181681	ENSMUSG00000035835	Plppr3	Lppr3|Prg2	phospholipid phosphatase related 3	protein-coding
chr10	79916705	79917051	+	782	NA	promoter-TSS (NM_177994)	promoter-TSS (NM_177994)	52	NM_177994	109284	Mm.300416	NM_177994	ENSMUSG00000035781	R3hdm4	AI503502|C030046I01Rik	R3H domain containing 4	protein-coding
chr10	80172740	80173208	+	587	NA	promoter-TSS (NM_027207)	promoter-TSS (NM_027207)	30	NM_027207	69770	Mm.302754	NM_027207	ENSMUSG00000035595	1600002K03Rik	-	RIKEN cDNA 1600002K03 gene	protein-coding
chr10	80292254	80292749	+	1000	NA	promoter-TSS (NM_009091)	promoter-TSS (NM_009091)	-8	NM_001310726	20054	Mm.643	NM_009091	ENSMUSG00000063457	Rps15	rig	ribosomal protein S15	protein-coding
chr10	80538811	80539397	+	540	NA	promoter-TSS (NM_026094)	promoter-TSS (NM_026094)	20	NM_026094	67331	Mm.52511	NM_026094	ENSMUSG00000003341	Atp8b3	1700042F02Rik|1700056N23Rik|ATPIK|SAPLT	ATPase, class I, type 8B, member 3	protein-coding
chr10	80578280	80578697	+	666	NA	intron (NR_155863, intron 1 of 2)	intron (NR_155863, intron 1 of 2)	364	NR_155863	102633244	Mm.415444	NR_155863		Gm26710	-	predicted gene, 26710	ncRNA
chr10	80606366	80607296	+	620	NA	exon (NM_001100606, exon 2 of 2)	exon (NM_001100606, exon 2 of 2)	-2429	NR_105877	102465550		NR_105877	ENSMUSG00000099283	Mir6912	Gm27990|mmu-mir-6912	microRNA 6912	ncRNA
chr10	80701623	80702875	+	1000	NA	promoter-TSS (NM_027829)	promoter-TSS (NM_027829)	-429	NM_172457	208228	Mm.49309	NM_172457	ENSMUSG00000003348	Mob3a	5330417K06Rik|A630029F06|AV218468|Mobkl2a	MOB kinase activator 3A	protein-coding
chr10	80917280	80917636	+	583	NA	intron (NM_010722, intron 1 of 11)	intron (NM_010722, intron 1 of 11)	787	NM_010722	16907	Mm.7362	NM_010722	ENSMUSG00000062075	Lmnb2	-	lamin B2	protein-coding
chr10	81025049	81025600	+	574	NA	promoter-TSS (NM_145217)	promoter-TSS (NM_145217)	53	NM_145217	208666	Mm.44995	NM_145217	ENSMUSG00000043670	Diras1	Di-Ras1|Gbts1|RIG	DIRAS family, GTP-binding RAS-like 1	protein-coding
chr10	81178075	81178292	+	1000	NA	promoter-TSS (NR_028549)	promoter-TSS (NR_028549)	-778	NR_028549	100217454		NR_028549	ENSMUSG00000064441	Snord37	MBII-376	small nucleolar RNA, C/D box 37	snoRNA
chr10	81285695	81286141	+	974	NA	promoter-TSS (NM_001282096)	promoter-TSS (NM_001282096)	-137	NM_001282096	27375	Mm.27984	NM_013769	ENSMUSG00000034917	Tjp3	-	tight junction protein 3	protein-coding
chr10	81432908	81433314	+	977	NA	Intergenic	Intergenic	-5938	NM_008688	18029	Mm.426936	NM_008688	ENSMUSG00000055053	Nfic	1110019L22Rik|1500041O16Rik|AA589446|AI746521|NF1-C	nuclear factor I/C	protein-coding
chr10	81571567	81572189	+	1000	NA	Intergenic	Intergenic	-3409	NM_019725	21886	Mm.38608	NM_019725	ENSMUSG00000034771	Tle2	Grg2|mKIAA4188	transducin-like enhancer of split 2	protein-coding
chr10	81627240	81627816	+	1000	NA	promoter-TSS (NM_001163430)	promoter-TSS (NM_001163430)	80	NM_181586	50721	Mm.25643	NM_181586	ENSMUSG00000034748	Sirt6	2810449N18Rik|AI043036|Sir2l6	sirtuin 6	protein-coding
chr10	82622497	82623536	+	932	NA	5' UTR (NM_001135567, exon 1 of 3)	5' UTR (NM_001135567, exon 1 of 3)	212	NM_001135567	544717	Mm.334867	NM_001135567	ENSMUSG00000063320	1190007I07Rik	-	RIKEN cDNA 1190007I07 gene	protein-coding
chr10	82798140	82798917	+	778	NA	Intergenic	Intergenic	-13595	NR_038042	70003	Mm.48789	NR_038042	ENSMUSG00000056821	1700028I16Rik	-	RIKEN cDNA 1700028I16 gene	ncRNA
chr10	83688034	83688562	+	614	NA	Intergenic	RMER1B|Other|Other	-34567	NM_001145198	69784	Mm.271188	NM_001145198	ENSMUSG00000087651	1500009L16Rik	2700050C19Rik|OCC-1	RIKEN cDNA 1500009L16 gene	protein-coding
chr10	84547740	84548564	+	1000	NA	non-coding (NR_040658, exon 4 of 4)	non-coding (NR_040658, exon 4 of 4)	5186	NR_040658	442847	Mm.128292	NR_040658	ENSMUSG00000097076	Platr7	C330046G13Rik	pluripotency associated transcript 7	ncRNA
chr10	85928334	85928949	+	1000	NA	exon (NM_001163614, exon 1 of 1)	exon (NM_001163614, exon 1 of 1)	1239	NM_001163614	67341	Mm.382315	NM_001163614	ENSMUSG00000085111	Ascl4	1700054F16Rik|bHLHa44	achaete-scute family bHLH transcription factor 4	protein-coding
chr10	86079934	86080551	+	644	NA	exon (NM_013722, exon 8 of 14)	exon (NM_013722, exon 8 of 14)	-15612	NR_038024	78170	Mm.444790	NR_038024	ENSMUSG00000112493	4930486F22Rik	-	RIKEN cDNA 4930486F22 gene	ncRNA
chr10	87057870	87058857	+	623	NA	intron (NM_029685, intron 1 of 5)	intron (NM_029685, intron 1 of 5)	317	NM_029685	76640	Mm.78423	NM_029685	ENSMUSG00000047129	1700113H08Rik	-	RIKEN cDNA 1700113H08 gene	protein-coding
chr10	87624154	87625422	+	610	NA	Intergenic	RMER1A|Other|Other	102993	NM_008777	18478	Mm.263539	NM_008777	ENSMUSG00000020051	Pah	AW106920	phenylalanine hydroxylase	protein-coding
chr10	87805681	87806220	+	1000	NA	Intergenic	Intergenic	-52315	NM_001314010	16000	Mm.268521	NM_010512	ENSMUSG00000020053	Igf1	C730016P09Rik|Igf-1|Igf-I	insulin-like growth factor 1	protein-coding
chr10	88146674	88147397	+	1000	NA	promoter-TSS (NM_028334)	promoter-TSS (NM_028334)	-36	NM_028334	69736	Mm.222184	NM_027191	ENSMUSG00000035351	Nup37	2410003L22Rik|2810039M17Rik	nucleoporin 37	protein-coding
chr10	88705580	88706168	+	745	NA	Intergenic	RMER13A|LTR|ERVK	-22851	NM_011461	20728	Mm.21642	NM_011461	ENSMUSG00000004359	Spic	AU019198|C76795|Prf|Spi-C	Spi-C transcription factor (Spi-1/PU.1 related)	protein-coding
chr10	89344638	89345452	+	770	NA	Intergenic	CpG	-87255	NM_001277188	320091	Mm.236464	NM_178773	ENSMUSG00000035189	Ano4	A330096O15Rik|Gm65|Tmem16d	anoctamin 4	protein-coding
chr10	91092685	91093136	+	858	NA	intron (NM_027078, intron 1 of 2)	intron (NM_027078, intron 1 of 2)	9871	NM_026166	67454	Mm.252843	NM_026166	ENSMUSG00000019975	Ikbip	1200009F10Rik|1700023M03Rik|D18354|Ikip	IKBKB interacting protein	protein-coding
chr10	93485151	93485739	+	697	NA	TTS (NM_001313897)	TTS (NM_001313897)	-3323	NM_010401	15109	Mm.13000	NM_010401	ENSMUSG00000020017	Hal	Hsd|his|histidase	histidine ammonia lyase	protein-coding
chr10	93539809	93540168	+	1000	NA	promoter-TSS (NM_027908)	promoter-TSS (NM_027908)	45	NM_027908	71761	Mm.244518	NM_027908	ENSMUSG00000015890	Amdhd1	1300019J08Rik	amidohydrolase domain containing 1	protein-coding
chr10	93559774	93560128	+	662	NA	intron (NM_001359749, intron 2 of 13)	RMER1B|Other|Other	5070	NM_001359749	237465	Mm.477086	NM_175488	ENSMUSG00000036168	Ccdc38	4933417K05Rik	coiled-coil domain containing 38	protein-coding
chr10	93783169	93783842	+	716	NA	Intergenic	Intergenic	-48050	NM_001206851	327799	Mm.491598	NM_183199	ENSMUSG00000020020	Usp44	E430004F17Rik	ubiquitin specific peptidase 44	protein-coding
chr10	93944229	93944581	+	1000	NA	Intergenic	Intergenic	19458	NR_029764	723908		NR_029764	ENSMUSG00000065607	Mir331	Mirn331|mmu-mir-331	microRNA 331	ncRNA
chr10	94025226	94025852	+	625	NA	intron (NM_001304720, intron 1 of 11)	RMER1A|Other|Other	10203	NM_001304720	215008	Mm.124177	NM_172538	ENSMUSG00000036099	Vezt	A630071D13Rik|AI848282	vezatin, adherens junctions transmembrane protein	protein-coding
chr10	94716327	94716659	+	580	NA	intron (NM_029852, intron 1 of 15)	RMER1B|Other|Other	27703	NM_029852	77048	Mm.296971	NM_029852	ENSMUSG00000020024	Cep83	2600001G24Rik|4921537D05Rik|5730513H21Rik|Ccdc41	centrosomal protein 83	protein-coding
chr10	94943378	94944927	+	940	NA	exon (NM_018797, exon 1 of 31)	exon (NM_018797, exon 1 of 31)	693	NM_018797	54712	Mm.256712	NM_018797	ENSMUSG00000074785	Plxnc1	2510048K12Rik|AW742158|CD232|Vespr	plexin C1	protein-coding
chr10	95323346	95324256	+	769	NA	promoter-TSS (NM_001330138)	promoter-TSS (NM_001330138)	-92	NM_001330138	12905	Mm.473739	NM_009950	ENSMUSG00000045867	Cradd	RAIDD	CASP2 and RIPK1 domain containing adaptor with death domain	protein-coding
chr10	95361182	95361893	+	994	NA	intron (NR_045337, intron 2 of 2)	L2b|LINE|L2	25261	NR_045337	69629	Mm.250542	NR_045337	ENSMUSG00000100550	2310039L15Rik	A53T-syn|G2-3|PrPsynA53T|Tg(Prnp-SNCA*A53T)23Mkle	RIKEN cDNA 2310039L15 gene	ncRNA
chr10	95457755	95458861	+	579	NA	Intergenic	B4A|SINE|B4	40933	NR_045339	70523	Mm.158398	NR_045338	ENSMUSG00000097766	5730420D15Rik	-	RIKEN cDNA 5730420D15 gene	ncRNA
chr10	96231375	96231704	+	727	NA	intron (NR_110448, intron 1 of 2)	intron (NR_110448, intron 1 of 2)	5332	NR_110448	74881	Mm.410819	NR_110448	ENSMUSG00000112762	4930459C07Rik	-	RIKEN cDNA 4930459C07 gene	ncRNA
chr10	97692837	97694422	+	851	NA	exon (NM_025724, exon 1 of 1)	exon (NM_025724, exon 1 of 1)	570	NM_025724	66716	Mm.56430	NM_025724	ENSMUSG00000047025	Ccer1	4921510H08Rik|AV259683	coiled-coil glutamate-rich protein 1	protein-coding
chr1	105984162	105984461	+	752	NA	intron (NR_151625, intron 2 of 2)	intron (NR_151625, intron 2 of 2)	5971	NR_151625	635504	Mm.359717	NR_151625		Gm7160	EG635504	predicted gene 7160	ncRNA
chr11	100038563	100039192	+	686	NA	intron (NM_027563, intron 4 of 6)	intron (NM_027563, intron 4 of 6)	2677	NM_027563	16672	Mm.289644	NM_027563	ENSMUSG00000043485	Krt34	4733401E01Rik|Ha2|K34|Krt1-4	keratin 34	protein-coding
chr11	100112943	100114015	+	736	NA	Intergenic	Intergenic	7098	NM_001313949	16663	Mm.4646	NM_010662	ENSMUSG00000044041	Krt13	CK13|K13|Krt-1.13|Krt1-13	keratin 13	protein-coding
chr11	100260687	100261493	+	571	NA	promoter-TSS (NM_010663)	promoter-TSS (NM_010663)	-61	NM_010663	16667	Mm.14046	NM_010663	ENSMUSG00000035557	Krt17	K17|Krt1-17	keratin 17	protein-coding
chr11	100545448	100545775	+	916	NA	promoter-TSS (NM_001363174)	promoter-TSS (NM_001363174)	3	NM_001363174	74407	Mm.31590	NM_028918	ENSMUSG00000006784	Ttc25	4933404O19Rik	tetratricopeptide repeat domain 25	protein-coding
chr11	100622768	100623123	+	832	NA	promoter-TSS (NM_028024)	promoter-TSS (NM_028024)	-10	NM_028024	71966	Mm.274734	NM_028024	ENSMUSG00000017837	Nkiras2	2410003M04Rik|4930527H08Rik|D630018G21Rik|KBRAS2	NFKB inhibitor interacting Ras-like protein 2	protein-coding
chr11	100768506	100769712	+	780	NA	exon (NM_031871, exon 4 of 9)	exon (NM_031871, exon 4 of 9)	1848	NM_031871	80860	Mm.37308	NM_031871	ENSMUSG00000017747	Ghdc	D11Lgp1e	GH3 domain containing	protein-coding
chr11	101069875	101070198	+	732	NA	promoter-TSS (NM_013792)	promoter-TSS (NM_013792)	-58	NM_013792	27419	Mm.95452	NM_013792	ENSMUSG00000001751	Naglu	-	alpha-N-acetylglucosaminidase (Sanfilippo disease IIIB)	protein-coding
chr11	101082399	101082800	+	632	NA	promoter-TSS (NM_001305982)	promoter-TSS (NM_001305982)	34	NR_155015	71743	Mm.182271	NM_027896	ENSMUSG00000001755	Coasy	1300003G02Rik|Dpck|Ppat|Ukr1	Coenzyme A synthase	protein-coding
chr11	101086886	101087874	+	623	NA	promoter-TSS (NM_001159385)	promoter-TSS (NM_001159385)	90	NM_001159384	21428	Mm.628	NM_011550	ENSMUSG00000017801	Mlx	Tcfl4|Tf4|bHLHd13	MAX-like protein X	protein-coding
chr11	101119511	101120888	+	1000	NA	promoter-TSS (NM_028933)	promoter-TSS (NM_028933)	82	NM_134024	103733	Mm.479145	NM_134024	ENSMUSG00000035198	Tubg1	1500010O08Rik|AI451582|AI503389|GCP-1|Tubg	tubulin, gamma 1	protein-coding
chr11	101245887	101247320	+	543	NA	intron (NM_019444, intron 1 of 3)	CpG	269	NM_019444	54409	Mm.260698	NM_019444	ENSMUSG00000001240	Ramp2	-	receptor (calcitonin) activity modifying protein 2	protein-coding
chr11	101259715	101261072	+	656	NA	promoter-TSS (NM_175638)	promoter-TSS (NM_175638)	-174	NM_175638	69847	Mm.23656	NM_175638	ENSMUSG00000035112	Wnk4	2010002J11Rik|Pha2b|Prkwnk4	WNK lysine deficient protein kinase 4	protein-coding
chr11	101351166	101351986	+	791	NA	Intergenic	Intergenic	-16140	NM_008061	14377	Mm.18064	NM_008061	ENSMUSG00000078650	G6pc	AW107337|G6Pase|G6pt|Glc-6-Pase	glucose-6-phosphatase, catalytic	protein-coding
chr11	101448188	101448764	+	744	NA	promoter-TSS (NM_027320)	promoter-TSS (NM_027320)	64	NM_027320	70110	Mm.45558	NM_027320	ENSMUSG00000010358	Ifi35	2010008K16Rik|AW986054|IFP35|ifi-35	interferon-induced protein 35	protein-coding
chr11	101465529	101466371	+	657	NA	exon (NM_012037, exon 1 of 6)	exon (NM_012037, exon 1 of 6)	249	NM_012037	26949	Mm.29210	NM_012037	ENSMUSG00000034993	Vat1	VAT-1	vesicle amine transport 1	protein-coding
chr11	102026652	102027367	+	707	NA	promoter-TSS (NM_007863)	promoter-TSS (NM_007863)	-54	NM_007863	13384	Mm.20449	NM_007863	ENSMUSG00000052373	Mpp3	6430514B01|Dlgh3	membrane protein, palmitoylated 3 (MAGUK p55 subfamily member 3)	protein-coding
chr11	102276310	102276916	+	668	NA	exon (NM_148953, exon 3 of 5)	exon (NM_148953, exon 3 of 5)	7862	NM_148953	217217	Mm.216432	NM_148953	ENSMUSG00000034768	Asb16	-	ankyrin repeat and SOCS box-containing 16	protein-coding
chr11	102665155	102666456	+	608	NA	exon (NM_001127576, exon 1 of 8)	exon (NM_001127576, exon 1 of 8)	220	NM_001127576	268491	Mm.447643	NM_001127576	ENSMUSG00000051455	Meioc	Gm1564|Gm663	meiosis specific with coiled-coil domain	protein-coding
chr11	102893016	102893572	+	644	NA	intron (NM_010277, intron 5 of 8)	CpG	3906	NM_010277	14580	Mm.1239	NM_010277	ENSMUSG00000020932	Gfap	AI836096	glial fibrillary acidic protein	protein-coding
chr11	103003303	103003609	+	733	NA	intron (NM_026551, intron 1 of 4)	intron (NM_026551, intron 1 of 4)	-3535	NR_105896	102466988		NR_105896	ENSMUSG00000098613	Mir6931	Gm27303|mmu-mir-6931	microRNA 6931	ncRNA
chr11	103697325	103698146	+	1000	NA	promoter-TSS (NM_019650)	promoter-TSS (NM_019650)	11	NR_102389	399609	Mm.351922	NR_102388		C130046K22Rik	-	RIKEN cDNA C130046K22 gene	ncRNA
chr11	104072719	104073241	+	1000	NA	Intergenic	FordPrefect|DNA|hAT-Tip100	-59801	NM_001313929	12921	Mm.1892	NM_007762	ENSMUSG00000018634	Crhr1	CRF1R|CRFR1|Crhr	corticotropin releasing hormone receptor 1	protein-coding
chr11	104608014	104608895	+	629	NA	intron (NM_016780, intron 1 of 14)	intron (NM_016780, intron 1 of 14)	454	NM_016780	16416	Mm.87150	NM_016780	ENSMUSG00000020689	Itgb3	CD61|GP3A|INGRB3	integrin beta 3	protein-coding
chr11	105362933	105363744	+	796	NA	intron (NM_172568, intron 11 of 11)	intron (NM_172568, intron 11 of 11)	70692	NM_008626	17534	Mm.235616	NM_008626	ENSMUSG00000020695	Mrc2	Endo180|mKIAA0709|uPARAP	mannose receptor, C type 2	protein-coding
chr11	106066736	106066908	+	821	NA	intron (NM_027346, intron 1 of 4)	intron (NM_027346, intron 1 of 4)	731	NM_027346	70207	Mm.343857	NM_027346	ENSMUSG00000001983	Taco1	2310066I18Rik|Ccdc44	translational activator of mitochondrially encoded cytochrome c oxidase I	protein-coding
chr11	107157191	107157632	+	683	NA	promoter-TSS (NM_001308498)	promoter-TSS (NM_001308498)	3	NM_001308498	105734734		NM_001308498		Gm11715	-	predicted gene 11715	protein-coding
chr11	109382669	109383006	+	880	NA	intron (NM_010303, intron 2 of 3)	PB1D10|SINE|Alu	-19183	NR_038097	100036768	Mm.467767	NR_038097	ENSMUSG00000056687	Gm11696	-	predicted gene 11696	ncRNA
chr11	109473125	109474167	+	725	NA	promoter-TSS (NM_134038)	promoter-TSS (NM_134038)	-48	NM_001029842	104681	Mm.265874	NM_134038	ENSMUSG00000041920	Slc16a6	AW743111|ESTM12|MCT 6|MCT 7|MCT6	solute carrier family 16 (monocarboxylic acid transporters), member 6	protein-coding
chr11	109554519	109554814	+	899	NA	intron (NM_001361978, intron 2 of 3)	intron (NM_001361978, intron 2 of 3)	10955	NM_001166177	74008	Mm.482224	NM_028710	ENSMUSG00000020604	Arsg	6330406P08Rik|AI846872|ASG	arylsulfatase G	protein-coding
chr11	109860180	109860934	+	1000	NA	Intergenic	Intergenic	14679	NR_045909	73257	Mm.250442	NR_045909	ENSMUSG00000087393	1700023C21Rik	-	RIKEN cDNA 1700023C21 gene	ncRNA
chr11	109995628	109996004	+	579	NA	promoter-TSS (NM_013851)	promoter-TSS (NM_013851)	29	NM_013851	27404	Mm.341004	NM_013851	ENSMUSG00000020620	Abca8b	Abca8	ATP-binding cassette, sub-family A (ABC1), member 8b	protein-coding
chr11	111065689	111066310	+	652	NA	promoter-TSS (NM_008425)	promoter-TSS (NM_008425)	-165	NM_008425	16518	Mm.4951	NM_008425	ENSMUSG00000041695	Kcnj2	IRK1|Kcnf1|Kir2.1	potassium inwardly-rectifying channel, subfamily J, member 2	protein-coding
chr11	11115641	11116651	+	543	NA	exon (NM_177033, exon 2 of 4)	exon (NM_177033, exon 2 of 4)	2130	NM_177033	319922	Mm.337851	NM_177033	ENSMUSG00000050830	Vwc2	A930041G11Rik|G11|PSST739|UNQ739|cradin	von Willebrand factor C domain containing 2	protein-coding
chr11	113649241	113650054	+	821	NA	exon (NM_013581, exon 1 of 14)	exon (NM_013581, exon 1 of 14)	118	NM_013581	16834	Mm.261620	NM_013581	ENSMUSG00000018661	Cog1	6030445I15|Ldlb|mKIAA1381	component of oligomeric golgi complex 1	protein-coding
chr11	114668427	114669208	+	1000	NA	intron (NM_001048057, intron 2 of 4)	CpG	237	NM_001362918	67671	Mm.238817	NM_023372	ENSMUSG00000057322	Rpl38	0610025G13Rik|Rbt|Ts|Tss	ribosomal protein L38	protein-coding
chr11	115042115	115042816	+	714	NA	intron (NM_199201, intron 3 of 3)	intron (NM_199201, intron 3 of 3)	-4775	NM_001101656	100043123		NM_001101656	ENSMUSG00000069609	Cd300ld4	Gm11710	CD300 molecule like family member D4	protein-coding
chr11	115297188	115298232	+	837	NA	promoter-TSS (NM_178035)	promoter-TSS (NM_178035)	-164	NM_178035	328035	Mm.21995	NM_178035	ENSMUSG00000044788	Fads6	BC044804	fatty acid desaturase domain family, member 6	protein-coding
chr11	115366759	115367895	+	731	NA	intron (NM_175454, intron 1 of 18)	CpG	392	NM_175454	217310	Mm.205707	NM_175454	ENSMUSG00000034586	Hid1	C630004H02Rik	HID1 domain containing	protein-coding
chr11	115497049	115498264	+	653	NA	3' UTR (NM_008258, exon 5 of 5)	3' UTR (NM_008258, exon 5 of 5)	-5842	NM_015807	50773	Mm.390379	NM_015807	ENSMUSG00000020736	Nt5c	Dnt|Dnt1|Umph-2|Umph2	5',3'-nucleotidase, cytosolic	protein-coding
chr11	116306263	116307267	+	1000	NA	promoter-TSS (NM_001162872)	promoter-TSS (NM_001162872)	-15	NM_001362839	53413	Mm.22530	NM_016857	ENSMUSG00000020792	Exoc7	Exo70|sec70	exocyst complex component 7	protein-coding
chr11	116335328	116335924	+	1000	NA	promoter-TSS (NM_008240)	promoter-TSS (NM_008240)	-272	NM_008240	15223	Mm.378938	NM_008240	ENSMUSG00000034227	Foxj1	FKHL-13|HFH-4|Hfh4	forkhead box J1	protein-coding
chr11	116412396	116413504	+	853	NA	promoter-TSS (NM_027258)	promoter-TSS (NM_027258)	82	NM_027258	217340	Mm.426344	NM_027258	ENSMUSG00000052949	Rnf157	2610036E23Rik|A130073L17Rik|mKIAA1917	ring finger protein 157	protein-coding
chr11	116463819	116464237	+	914	NA	Intergenic	Intergenic	-9681	NM_001033267	217341	Mm.387352	NM_001033267	ENSMUSG00000070331	Qrich2	Gm66	glutamine rich 2	protein-coding
chr11	116489748	116490729	+	1000	NA	5' UTR (NM_026364, exon 1 of 10)	5' UTR (NM_026364, exon 1 of 10)	108	NM_026364	67763	Mm.25125	NM_026364	ENSMUSG00000015869	Prpsap1	5730409F23Rik|PAP39	phosphoribosyl pyrophosphate synthetase-associated protein 1	protein-coding
chr11	116741190	116741551	+	567	NA	Intergenic	Intergenic	-10797	NR_003364	193217	Mm.100084	NR_003364		BC018473	-	cDNA sequence BC018473	ncRNA
chr11	116765617	116767152	+	1000	NA	intron (NM_011371, intron 6 of 8)	intron (NM_011371, intron 6 of 8)	9123	NM_011371	20445	Mm.436887	NM_011371	ENSMUSG00000009588	St6galnac1	Siat7a	ST6 (alpha-N-acetyl-neuraminyl-2,3-beta-galactosyl-1,3)-N-acetylgalactosaminide alpha-2,6-sialyltransferase 1	protein-coding
chr11	11684228	11686210	+	911	NA	promoter-TSS (NM_009578)	promoter-TSS (NM_009578)	-706	NM_001025597	22778	Mm.103545	NM_009578	ENSMUSG00000018654	Ikzf1	5832432G11Rik|Ikaros|LyF-1|Zfpn1a1|Znfn1a1|hlk-1|mKIAA4227	IKAROS family zinc finger 1	protein-coding
chr11	117790203	117791586	+	571	NA	intron (NM_001195090, intron 11 of 15)	intron (NM_001195090, intron 11 of 15)	-6766	NM_029964	77727	Mm.159981	NM_029964	ENSMUSG00000025573	6030468B19Rik	Il-40	RIKEN cDNA 6030468B19 gene	protein-coding
chr11	117825733	117826387	+	715	NA	promoter-TSS (NM_009387)	promoter-TSS (NM_009387)	-46	NM_001271729	21877	Mm.2661	NM_009387	ENSMUSG00000025574	Tk1	D530002A18Rik|Tk-1|Tk1a|Tk1b	thymidine kinase 1	protein-coding
chr11	117832148	117832804	+	1000	NA	intron (NM_001363158, intron 1 of 7)	intron (NM_001363158, intron 1 of 7)	372	NM_001363158	71562	Mm.273958	NM_027827	ENSMUSG00000017718	Afmid	9030621K19Rik|Ammd|FKF|KFA|Kf|formylase	arylformamidase	protein-coding
chr11	117901082	117901792	+	620	NA	Intergenic	Intergenic	-27911	NM_027919	71776	Mm.3200	NM_027919	ENSMUSG00000017713	Tha1	1300017K07Rik|GLY1	threonine aldolase 1	protein-coding
chr11	117986583	117987259	+	1000	NA	promoter-TSS (NM_133757)	promoter-TSS (NM_133757)	64	NM_133757	74451	Mm.28864	NM_133757	ENSMUSG00000017715	Pgs1	2610019F11Rik|4933424M23Rik|SAF	phosphatidylglycerophosphate synthase 1	protein-coding
chr11	118007443	118008119	+	558	NA	intron (NR_151726, intron 7 of 9)	intron (NR_151726, intron 7 of 9)	5511	NR_105898	102466768		NR_105898	ENSMUSG00000098958	Mir6933	Gm27856|mmu-mir-6933	microRNA 6933	ncRNA
chr11	118985589	118985957	+	573	NA	Intergenic	Intergenic	-2408	NM_001359574	238011	Mm.244114	NM_001030291	ENSMUSG00000046697	Enpp7	Alk-SMase|Gm254	ectonucleotide pyrophosphatase/phosphodiesterase 7	protein-coding
chr11	119330375	119331705	+	667	NA	intron (NM_130886, intron 11 of 22)	intron (NM_130886, intron 11 of 22)	23272	NM_130886	170720	Mm.130832	NM_130886	ENSMUSG00000013483	Card14	Bimp2|CARMA2	caspase recruitment domain family, member 14	protein-coding
chr11	119389905	119390766	+	590	NA	promoter-TSS (NR_035453)	promoter-TSS (NR_035453)	-137	NR_035453	100316690		NR_035453	ENSMUSG00000088015	Mir1932	mir-1932|mmu-mir-1932	microRNA 1932	ncRNA
chr11	119856643	119857091	+	970	NA	intron (NM_001306081, intron 17 of 32)	intron (NM_001306081, intron 17 of 32)	-22502	NR_045313	319454	Mm.442144	NR_045312	ENSMUSG00000085081	Rptoros	A430071A18Rik	regulatory associated protein of MTOR, complex 1, opposite strand	ncRNA
chr11	120150775	120151631	+	1000	NA	5' UTR (NM_001164802, exon 1 of 11)	5' UTR (NM_001164802, exon 1 of 11)	148	NM_001164799	72055	Mm.253403	NM_024249	ENSMUSG00000061306	Slc38a10	1810073N04Rik	solute carrier family 38, member 10	protein-coding
chr11	120231410	120231735	+	853	NA	promoter-TSS (NR_151480)	promoter-TSS (NR_151480)	45	NR_151480	102640779	Mm.394084	NM_175248		2900052L18Rik	-	RIKEN cDNA 2900052L18 gene	ncRNA
chr11	120353530	120354116	+	716	NA	Intergenic	Intergenic	5145	NR_038126	66838	Mm.375010	NR_038126	ENSMUSG00000043644	0610009L18Rik	-	RIKEN cDNA 0610009L18 gene	ncRNA
chr11	120437133	120437780	+	702	NA	intron (NM_199469, intron 1 of 15)	CpG	244	NM_199469	217365	Mm.309520	NM_199469	ENSMUSG00000039703	Nploc4	AK129375|Npl4|mKIAA1499	NPL4 homolog, ubiquitin recognition factor	protein-coding
chr11	120457599	120458405	+	983	NA	promoter-TSS (NM_025560)	promoter-TSS (NM_025560)	68	NM_001356385	66431	Mm.45063	NM_025560	ENSMUSG00000039670	Oxld1	1810049H13Rik	oxidoreductase like domain containing 1	protein-coding
chr11	120515636	120515909	+	555	NA	Intergenic	Intergenic	-14955	NM_008101	14527	Mm.22329	NM_008101	ENSMUSG00000025127	Gcgr	GR	glucagon receptor	protein-coding
chr11	120549125	120549899	+	1000	NA	TTS (NM_026814)	TTS (NM_026814)	215	NM_001033231	192173	Mm.262300	NM_001033231	ENSMUSG00000061111	Mcrip1	Fam195b	MAPK regulated corepressor interacting protein 1	protein-coding
chr11	120581147	120581867	+	685	NA	promoter-TSS (NM_001363425)	promoter-TSS (NM_001363425)	117	NM_133796	192662	Mm.30016	NM_133796	ENSMUSG00000025132	Arhgdia	5330430M07Rik|Gdi-1|Rho GDI alpha|Rho-GDI|RhoDGI|RhoGDI-1|rho GDI 1|rho-GDI alpha	Rho GDP dissociation inhibitor (GDI) alpha	protein-coding
chr11	120597716	120598826	+	1000	NA	promoter-TSS (NM_011568)	promoter-TSS (NM_011568)	94	NM_011568	21681	Mm.1886	NM_011568	ENSMUSG00000025134	Alyref	Aly|Ref1|Ref1-I|Refbp1|Tho4|Thoc4	Aly/REF export factor	protein-coding
chr11	120783825	120784742	+	1000	NA	promoter-TSS (NM_001177874)	promoter-TSS (NM_001177874)	13	NM_001177874	209318	Mm.30195	NM_145370	ENSMUSG00000025156	Gps1	Cops1|Csn1|R75577|Sgn1	G protein pathway suppressor 1	protein-coding
chr11	121041224	121041593	+	914	NA	Intergenic	Intergenic	-1930	NM_009854	12516	Mm.4100	NM_009854	ENSMUSG00000025163	Cd7	-	CD7 antigen	protein-coding
chr11	121145891	121146393	+	540	NA	promoter-TSS (NM_028602)	promoter-TSS (NM_028602)	-1	NM_028602	73679	Mm.390423	NM_028602	ENSMUSG00000039329	Tex19.1	2410081M02Rik|Tex19|Tex19a|mTex19.1	testis expressed gene 19.1	protein-coding
chr11	121387126	121388831	+	662	NA	promoter-TSS (NR_106095)	promoter-TSS (NR_106095)	273	NM_139147	217371	Mm.281639	NM_139147	ENSMUSG00000025170	Rab40b	SEC4L|rar	Rab40B, member RAS oncogene family	protein-coding
chr11	121830002	121831047	+	697	NA	exon (NM_029049, exon 1 of 4)	exon (NM_029049, exon 1 of 4)	306	NM_029049	74675	Mm.61213	NM_029049	ENSMUSG00000039198	Ptchd3	4930451E13Rik|4933440L20Rik|RNDEu-3	patched domain containing 3	protein-coding
chr11	16950857	16951851	+	1000	NA	promoter-TSS (NM_176982)	promoter-TSS (NM_176982)	-21	NM_001359162	319701	Mm.120672	NM_176982	ENSMUSG00000044966	Fbxo48	A630050E13Rik	F-box protein 48	protein-coding
chr11	17051709	17052551	+	962	NA	5' UTR (NM_029861, exon 1 of 3)	5' UTR (NM_029861, exon 1 of 3)	271	NM_029861	380686	Mm.425666	NM_029861	ENSMUSG00000044629	Cnrip1	1500041B16Rik|3110054C06Rik|5330437A18Rik|AI854501|C2orf32	cannabinoid receptor interacting protein 1	protein-coding
chr11	17221216	17221404	+	1000	NA	intron (NM_178909, intron 2 of 7)	LSU-rRNA_Hsa|rRNA|rRNA	9417	NM_178909	103784	Mm.298132	NM_178909	ENSMUSG00000078970	Wdr92	AI553587|HZGJ	WD repeat domain 92	protein-coding
chr1	118321606	118322279	+	1000	NA	promoter-TSS (NM_026472)	promoter-TSS (NM_026472)	99	NM_026472	67949	Mm.280311	NM_026472	ENSMUSG00000026377	Nifk	AI852665|C130020J04Rik|Mki67ip	nucleolar protein interacting with the FHA domain of MKI67	protein-coding
chr1	120758360	120759159	+	927	NA	Intergenic	B4A|SINE|B4	156272	NM_010133	13798	Mm.2657	NM_010133	ENSMUSG00000058665	En1	En-1|Mo-en.1|engrailed-1	engrailed 1	protein-coding
chr1	121483121	121483392	+	836	NA	intron (NM_001025156, intron 16 of 23)	intron (NM_001025156, intron 16 of 23)	45209	NM_010483	15564	Mm.4833	NM_010483	ENSMUSG00000050534	Htr5b	5-Ht5b	5-hydroxytryptamine (serotonin) receptor 5B	protein-coding
chr11	23894490	23895577	+	1000	NA	exon (NM_172555, exon 1 of 22)	exon (NM_172555, exon 1 of 22)	237	NM_172555	216578	Mm.470599	NM_172555	ENSMUSG00000020273	Papolg	9630006B20Rik	poly(A) polymerase gamma	protein-coding
chr11	24342786	24343429	+	929	NA	Intergenic	Intergenic	-138802	NR_045857	71316	Mm.79162	NR_045857	ENSMUSG00000086892	4933430M04Rik	-	RIKEN cDNA 4933430M04 gene	ncRNA
chr1	124487846	124488270	+	1000	NA	Intergenic	Intergenic	-442499	NM_199021	269109	Mm.417716	NM_199021	ENSMUSG00000036815	Dpp10	6430601K09Rik|DPP X|Dprp3	dipeptidylpeptidase 10	protein-coding
chr1	125911928	125913194	+	862	NA	promoter-TSS (NM_145100)	promoter-TSS (NM_145100)	-347	NM_145100	72585	Mm.490405	NM_145100	ENSMUSG00000026344	Lypd1	2700050C12Rik|AI853408|C530008O16Rik|Lynx2|Lypdc1	Ly6/Plaur domain containing 1	protein-coding
chr11	26961508	26961922	+	761	NA	Intergenic	Intergenic	176607	NR_002890	654472	Mm.347777	NR_002890		Gm12070	-	glyceraldehyde-3-phosphate dehydrogenase pseudogene	pseudo
chr1	127496772	127497034	+	695	NA	intron (NM_028135, intron 6 of 7)	intron (NM_028135, intron 6 of 7)	181118	NM_028135	72160	Mm.281287	NM_028135	ENSMUSG00000026347	Tmem163	2610024A01Rik|A-cre|Act-Cre|SV31|Tg(ACTB-cre)2Mrt|actin-cre|cre<actin>	transmembrane protein 163	protein-coding
chr11	28813120	28813355	+	657	NA	Intergenic	Intergenic	-39968	NM_146015	216616	Mm.44176	NM_146015	ENSMUSG00000020467	Efemp1	-	epidermal growth factor-containing fibulin-like extracellular matrix protein 1	protein-coding
chr11	29839884	29840207	+	599	NA	intron (NM_146016, intron 10 of 41)	intron (NM_146016, intron 10 of 41)	-14377	NM_176829	216622	Mm.443260	NM_176829	ENSMUSG00000078157	4931440F15Rik	Fem1ab	RIKEN cDNA 4931440F15 gene	protein-coding
chr1	130717107	130717783	+	671	NA	5' UTR (NM_178691, exon 1 of 2)	5' UTR (NM_178691, exon 1 of 2)	118	NM_178691	226418	Mm.106553	NM_178691	ENSMUSG00000046404	Yod1	6330564D18Rik|9930028C20Rik|Hshin7	YOD1 deubiquitinase	protein-coding
chr1	130879885	130880645	+	911	NA	intron (NM_026976, intron 7 of 7)	intron (NM_026976, intron 7 of 7)	7146	NM_053095	93672	Mm.196691	NM_053095	ENSMUSG00000026420	Il24	FISP|Mda-7|Mda7|St16	interleukin 24	protein-coding
chr11	30953670	30954776	+	1000	NA	promoter-TSS (NM_023906)	promoter-TSS (NM_023906)	-92	NM_025745	66753	Mm.294641	NM_025745	ENSMUSG00000020311	Erlec1	4933407N01Rik	endoplasmic reticulum lectin 1	protein-coding
chr11	30985875	30986963	+	1000	NA	promoter-TSS (NM_026527)	promoter-TSS (NM_026527)	-54	NM_026527	68044	Mm.32656	NM_026527	ENSMUSG00000020309	Chac2	-	ChaC, cation transport regulator 2	protein-coding
chr1	131153011	131153487	+	786	NA	promoter-TSS (NM_010709)	promoter-TSS (NM_010709)	42	NM_010709	16865	Mm.276294	NM_010709	ENSMUSG00000026427	Eif2d	D1Ertd5e|Lgtn	eukaryotic translation initiation factor 2D	protein-coding
chr1	131239012	131239973	+	661	NA	intron (NM_018750, intron 1 of 5)	intron (NM_018750, intron 1 of 5)	5686	NM_001313731	54354	Mm.248291	NM_018750	ENSMUSG00000026430	Rassf5	1300019G20Rik|Maxp1|Nore1|Nore1A|Nore1B|Rapl	Ras association (RalGDS/AF-6) domain family member 5	protein-coding
chr1	131962556	131963861	+	693	NA	intron (NM_001177628, intron 1 of 4)	CpG	293	NM_001177628	212980	Mm.200307	NM_145977	ENSMUSG00000026435	Slc45a3	2210413P12Rik|AU023994|AU043764|IPCA-6|PRST|Pcanap6	solute carrier family 45, member 3	protein-coding
chr1	132139338	132139906	+	680	NA	promoter-TSS (NM_008795)	promoter-TSS (NM_008795)	63	NM_008795	18557	Mm.28130	NM_008795	ENSMUSG00000026437	Cdk18	AA682070|Ctk18|Pctk3	cyclin-dependent kinase 18	protein-coding
chr11	32162197	32162482	+	783	NA	Intergenic	Intergenic	37940	NM_008374	16199	Mm.384	NM_008374	ENSMUSG00000020279	Il9r	-	interleukin 9 receptor	protein-coding
chr1	132880137	132880619	+	593	NA	promoter-TSS (NM_010732)	promoter-TSS (NM_010732)	23	NM_010732	16980	Mm.39640	NM_010732	ENSMUSG00000026443	Lrrn2	5730406J09Rik|NLRR-2	leucine rich repeat protein 2, neuronal	protein-coding
chr1	133423289	133424467	+	776	NA	5' UTR (NM_011439, exon 1 of 14)	5' UTR (NM_011439, exon 1 of 14)	334	NM_011439	20668	Mm.8575	NM_011439	ENSMUSG00000070643	Sox13	AA407916|AW259412|AW540933|Sox-13	SRY (sex determining region Y)-box 13	protein-coding
chr1	134343674	134344912	+	733	NA	Intergenic	Intergenic	-11365	NM_001144855	68507	Mm.295105	NM_001144855	ENSMUSG00000026458	Ppfia4	100042382|1110008G13Rik|AI448359|AI852265|C81506|Gm3812	protein tyrosine phosphatase, receptor type, f polypeptide (PTPRF), interacting protein (liprin), alpha 4	protein-coding
chr11	3508232	3508793	+	610	NA	Intergenic	Intergenic	-3691	NM_172439	170835	Mm.24313	NM_172439	ENSMUSG00000034570	Inpp5j	Pib5pa|Pipp	inositol polyphosphate 5-phosphatase J	protein-coding
chr1	135268122	135268681	+	883	NA	intron (NM_145417, intron 5 of 10)	intron (NM_145417, intron 5 of 10)	-9929	NM_007921	13710	Mm.441439	NM_007921	ENSMUSG00000003051	Elf3	ESE-1|ESX|jen	E74-like factor 3	protein-coding
chr1	135374749	135375560	+	741	NA	promoter-TSS (NM_175259)	promoter-TSS (NM_175259)	-91	NM_175259	77552	Mm.41407	NM_175259	ENSMUSG00000041889	Shisa4	9330132O05Rik|Tmem58|mShisa4	shisa family member 4	protein-coding
chr1	135793317	135794016	+	624	NA	Intergenic	Intergenic	-5755	NM_021467	21952	Mm.44379	NM_021467	ENSMUSG00000026418	Tnni1	2700018B22Rik|AI747285|ssTnI	troponin I, skeletal, slow 1	protein-coding
chr11	35797724	35798316	+	718	NA	exon (NM_001004147, exon 1 of 1)	exon (NM_001004147, exon 1 of 1)	864	NM_001004147	237730	Mm.189222	NM_001004147	ENSMUSG00000051062	Fbll1	AI595406	fibrillarin-like 1	protein-coding
chr1	136409650	136410079	+	697	NA	Intergenic	Intergenic	-5407	NM_026500	67997	Mm.385462	NM_026500	ENSMUSG00000026404	Ddx59	1210002B07Rik|4833411G06Rik	DEAD (Asp-Glu-Ala-Asp) box polypeptide 59	protein-coding
chr11	3648319	3649905	+	1000	NA	promoter-TSS (NM_001159288)	promoter-TSS (NM_001159288)	-298	NR_002321	544752	Mm.390314	NR_002321	ENSMUSG00000056579	Tug1	AI316828	taurine upregulated gene 1	ncRNA
chr1	136683332	136684090	+	788	NA	promoter-TSS (NR_045325)	promoter-TSS (NR_045325)	82	NR_045325	100503460	Mm.30630	NR_045324	ENSMUSG00000097113	Gm19705	-	predicted gene, 19705	ncRNA
chr1	138180079	138180478	+	763	NA	Intergenic	ORR1C2|LTR|ERVL-MaLR	-4973	NM_011210	19264	Mm.391573	NM_011210	ENSMUSG00000026395	Ptprc	B220|CD45R|Cd45|L-CA|Ly-5|Lyt-4|T200|loc	protein tyrosine phosphatase, receptor type, C	protein-coding
chr11	3983499	3984703	+	569	NA	intron (NM_001177703, intron 1 of 2)	intron (NM_001177703, intron 1 of 2)	465	NM_001177703	53897	Mm.103414	NM_016922	ENSMUSG00000049721	Gal3st1	Cst|Gcst	galactose-3-O-sulfotransferase 1	protein-coding
chr11	4031076	4032193	+	631	NA	promoter-TSS (NM_146013)	promoter-TSS (NM_146013)	-148	NM_146013	103655	Mm.337476	NM_146013	ENSMUSG00000019368	Sec14l4	AI256582|AW536553|SPF|TAP	SEC14-like lipid binding 4	protein-coding
chr11	4134848	4135675	+	890	NA	5' UTR (NM_001363143, exon 1 of 7)	5' UTR (NM_001363143, exon 1 of 7)	101	NM_027859	71673	Mm.240586	NM_027859	ENSMUSG00000003581	Rnf215	0610009J22Rik|AW557025|C77903	ring finger protein 215	protein-coding
chr11	4160057	4160736	+	1000	NA	promoter-TSS (NM_026175)	promoter-TSS (NM_026175)	42	NM_026175	67465	Mm.156914	NM_026175	ENSMUSG00000002129	Sf3a1	1200014H24Rik|5930416L09Rik|AI159724	splicing factor 3a, subunit 1	protein-coding
chr11	42419791	42420606	+	620	NA	promoter-TSS (NM_001362647)	promoter-TSS (NM_001362647)	-242	NM_001362646	14401	Mm.338723	NM_008070	ENSMUSG00000007653	Gabrb2	AI834970|C030002O17Rik|C030021G16Rik|Gabrab2|Gabrb-2	gamma-aminobutyric acid (GABA) A receptor, subunit beta 2	protein-coding
chr11	4308617	4308971	+	572	NA	Intergenic	Intergenic	41998	NM_001039537	16878	Mm.4964	NM_008501	ENSMUSG00000034394	Lif	-	leukemia inhibitory factor	protein-coding
chr11	43425862	43426403	+	1000	NA	promoter-TSS (NM_013917)	promoter-TSS (NM_013917)	119	NM_001362799	30939	Mm.6856	NM_013917	ENSMUSG00000020415	Pttg1	AW555095|C87862|Pttg|Pttg3	pituitary tumor-transforming gene 1	protein-coding
chr1	143542442	143542648	+	869	NA	Intergenic	Intergenic	-98152	NM_020025	26878	Mm.285580	NM_020025	ENSMUSG00000033849	B3galt2	-	UDP-Gal:betaGlcNAc beta 1,3-galactosyltransferase, polypeptide 2	protein-coding
chr11	44323083	44323725	+	1000	NA	Intergenic	Intergenic	-76659	NM_001303244	16160	Mm.239707	NM_008352	ENSMUSG00000004296	Il12b	Il-12b|Il-12p40|Il12p40|p40	interleukin 12b	protein-coding
chr1	144406708	144406996	+	681	NA	Intergenic	Intergenic	-157748	NM_015811	50778	Mm.103701	NM_015811	ENSMUSG00000026358	Rgs1	BL34	regulator of G-protein signaling 1	protein-coding
chr11	4489606	4490088	+	640	NA	intron (NM_028860, intron 14 of 17)	intron (NM_028860, intron 14 of 17)	-48765	NM_029458	75828	Mm.159592	NM_029458	ENSMUSG00000020419	Hormad2	4930529M09Rik	HORMA domain containing 2	protein-coding
chr1	145960730	145961107	+	551	NA	Intergenic	L1_Mur3|LINE|L1	-534711	NM_001357571	215378	Mm.441817	NM_153539	ENSMUSG00000035131	Brinp3	B830045N13Rik|Fam5c	bone morphogenetic protein/retinoic acid inducible neural specific 3	protein-coding
chr11	46055536	46056323	+	838	NA	promoter-TSS (NM_009616)	promoter-TSS (NM_009616)	-55	NM_009616	11492	Mm.89940	NM_009616	ENSMUSG00000011256	Adam19	AL024287|MADDAM|MTLNB|Mltnb	a disintegrin and metallopeptidase domain 19 (meltrin beta)	protein-coding
chr11	46177040	46178019	+	1000	NA	Intergenic	L2a|LINE|L2	7442	NR_106098	102465715		NR_106098	ENSMUSG00000099331	Mir7239	Gm27504|mmu-mir-7239	microRNA 7239	ncRNA
chr11	46409939	46410718	+	597	NA	Intergenic	RMER1B|Other|Other	5600	NM_001013783	432552	Mm.443244	NM_001013783	ENSMUSG00000020401	Fam71b	Gari-l3	family with sequence similarity 71, member B	protein-coding
chr11	46784867	46786251	+	653	NA	Intergenic	RMER1B|Other|Other	-25240	NM_178759	276891	Mm.69002	NM_178759	ENSMUSG00000055546	Timd4	B430010N18Rik|TIM-4|Tim4	T cell immunoglobulin and mucin domain containing 4	protein-coding
chr11	4704030	4704433	+	956	NA	promoter-TSS (NM_001356391)	promoter-TSS (NM_001356391)	113	NR_156411	66152	Mm.269736	NM_197979	ENSMUSG00000059534	Uqcr10	1110020P15Rik|AA960494|Ucrc	ubiquinol-cytochrome c reductase, complex III subunit X	protein-coding
chr11	4704535	4705019	+	831	NA	promoter-TSS (NM_001362879)	promoter-TSS (NM_001362879)	121	NM_001356390	67178	Mm.271056	NM_026015	ENSMUSG00000009076	Zmat5	2610510L01Rik|D11Bwg0572e|D11Bwg1548e	zinc finger, matrin type 5	protein-coding
chr11	47988387	47989114	+	838	NA	Intergenic	CpG	-609425	NM_011891	24052	Mm.34175	NM_011891	ENSMUSG00000020354	Sgcd	35DAG|A530047J11Rik|AI504364|AW547581|SG-delta|delta-SG	sarcoglycan, delta (dystrophin-associated glycoprotein)	protein-coding
chr11	4873709	4874201	+	933	NA	promoter-TSS (NM_008698)	promoter-TSS (NM_008698)	4	NM_008698	18082	Mm.293716	NM_008698	ENSMUSG00000034285	Nipsnap1	-	nipsnap homolog 1	protein-coding
chr11	4883196	4884372	+	545	NA	intron (NM_008698, intron 3 of 9)	intron (NM_008698, intron 3 of 9)	-7561	NR_105883	102466764		NR_105883	ENSMUSG00000098296	Mir6918	Gm27968|mmu-mir-6918	microRNA 6918	ncRNA
chr11	49337125	49337448	+	871	NA	Intergenic	Intergenic	-3248	NM_147065	259068	Mm.377819	NM_147065	ENSMUSG00000045421	Olfr1390	MOR256-2	olfactory receptor 1390	protein-coding
chr1	149897242	149897865	+	1000	NA	intron (NM_001305632, intron 4 of 16)	intron (NM_001305632, intron 4 of 16)	24886	NM_001305632	18783	Mm.4186	NM_008869	ENSMUSG00000056220	Pla2g4a	Pla2g4|cPLA2|cPLA2-alpha|cPLA2alpha	phospholipase A2, group IVA (cytosolic, calcium-dependent)	protein-coding
chr11	49901366	49902652	+	599	NA	promoter-TSS (NM_001347462)	promoter-TSS (NM_001347462)	-152	NM_001347462	74563	Mm.258798	NM_029004	ENSMUSG00000020374	Rasgef1c	9130006A14Rik	RasGEF domain family, member 1C	protein-coding
chr11	50224815	50226111	+	663	NA	5' UTR (NM_145926, exon 1 of 15)	5' UTR (NM_145926, exon 1 of 15)	128	NM_145926	103534	Mm.86759	NM_145926	ENSMUSG00000036620	Mgat4b	AA407995|GnTIVb	mannoside acetylglucosaminyltransferase 4, isoenzyme B	protein-coding
chr11	50827422	50828014	+	823	NA	promoter-TSS (NM_013922)	promoter-TSS (NM_013922)	13	NM_013922	30944	Mm.103674	NM_013922	ENSMUSG00000044807	Zfp354c	5330421P20Rik|AJ18|AW743325|Kid3|Tcf17l2|Znf354c|mKIAA4218	zinc finger protein 354C	protein-coding
chr11	50850996	50851657	+	744	NA	exon (NM_173372, exon 2 of 11)	exon (NM_173372, exon 2 of 11)	641	NM_173372	108072	Mm.134265	NM_173372	ENSMUSG00000000617	Grm6	BC021919|Gm3|Gprc1f|mGluR6|nerg1|nob2|nob3|nob4	glutamate receptor, metabotropic 6	protein-coding
chr1	151168483	151169040	+	931	NA	Intergenic	Intergenic	30727	NR_038011	402734	Mm.337666	NR_038011		C730036E19Rik	lncLSTR	RIKEN cDNA C730036E19 gene	ncRNA
chr11	51175832	51176576	+	618	NA	Intergenic	(CAG)n|Simple_repeat|Simple_repeat	44214	NR_110444	71297	Mm.390420	NR_110444	ENSMUSG00000086646	Platr20	5133400J02Rik	pluripotency associated transcript 20	ncRNA
chr11	51289642	51290411	+	842	NA	5' UTR (NM_153393, exon 1 of 29)	5' UTR (NM_153393, exon 1 of 29)	106	NM_153393	237759	Mm.154093	NM_153393	ENSMUSG00000063564	Col23a1	2810458L13Rik|AI429655	collagen, type XXIII, alpha 1	protein-coding
chr1	151571253	151571960	+	915	NA	intron (NM_022018, intron 1 of 13)	CpG	233	NM_022018	63913	Mm.157700	NM_022018	ENSMUSG00000026483	Fam129a	AI256368|AU019833|Niban	family with sequence similarity 129, member A	protein-coding
chr11	51650384	51651490	+	1000	NA	promoter-TSS (NR_027958)	promoter-TSS (NR_027958)	-17	NR_027958	97775	Mm.220299	NM_175289	ENSMUSG00000052563	D930048N14Rik	AI315703|R75254	RIKEN cDNA D930048N14 gene	ncRNA
chr11	51801059	51801740	+	834	NA	Intergenic	Intergenic	37736	NM_025535	66397	Mm.196592	NM_025535	ENSMUSG00000020386	Sar1b	2310075M17Rik|2900019I22Rik|CMRD|Sara1b|Sara2|Sarb	secretion associated Ras related GTPase 1B	protein-coding
chr11	52167987	52168437	+	765	NA	Intergenic	Intergenic	-10305	NR_034155	257871	Mm.253576	NR_034155		Olfr1372-ps1	GA_x5J8B7TR6JS-3-632|MOR256-54P|NP_TR6JSE50FPA	olfactory receptor 1372, pseudogene 1	pseudo
chr11	52198792	52200276	+	698	NA	Intergenic	RMER1A|Other|Other	14453	NM_207253	276865	Mm.377871	NM_207253	ENSMUSG00000060170	Olfr1371	GA_x6K02T2QP88-3214035-3214970|MOR256-58	olfactory receptor 1371	protein-coding
chr1	15286325	15287098	+	665	NA	promoter-TSS (NM_001098528)	promoter-TSS (NM_001098528)	-214	NM_001098528	98741	Mm.156081	NM_001033195	ENSMUSG00000092083	Kcnb2	9630047L19Rik|BB130875|Kv2.2	potassium voltage gated channel, Shab-related subfamily, member 2	protein-coding
chr1	153401800	153402086	+	788	NA	Intergenic	Intergenic	12290	NR_033736	626058	Mm.31556	NM_001177359		E330020D12Rik	EG626058|F430003O07Rik|Gm6648	Riken cDNA E330020D12 gene	ncRNA
chr1	153424435	153425566	+	642	NA	promoter-TSS (NM_001033162)	promoter-TSS (NM_001033162)	-209	NM_001033162	71836	Mm.49460	NM_001033162	ENSMUSG00000042708	Shcbp1l	1700012A16Rik	Shc SH2-domain binding protein 1-like	protein-coding
chr11	53497230	53497592	+	652	NA	Intergenic	Intergenic	-17216	NM_183173	237761	Mm.145208	NM_183173	ENSMUSG00000044352	Sowaha	A830006N08Rik|Ankrd43	sosondowah ankyrin repeat domain family member A	protein-coding
chr1	153542668	153543372	+	788	NA	intron (NM_028749, intron 2 of 11)	intron (NM_028749, intron 2 of 11)	6694	NM_028749	74091	Mm.24887	NM_028749	ENSMUSG00000042684	Npl	0610033B02Rik	N-acetylneuraminate pyruvate lyase	protein-coding
chr1	153986717	153987150	+	730	NA	Intergenic	Intergenic	87004	NM_008131	14645	Mm.210745	NM_008131	ENSMUSG00000026473	Glul	GS|Glns	glutamate-ammonia ligase (glutamine synthetase)	protein-coding
chr11	54027880	54028817	+	908	NA	promoter-TSS (NM_001330304)	promoter-TSS (NM_001330304)	-244	NM_001330304	30805	Mm.274590	NM_019687	ENSMUSG00000020334	Slc22a4	Octn1	solute carrier family 22 (organic cation transporter), member 4	protein-coding
chr1	154150107	154150737	+	697	NA	Intergenic	Intergenic	-50765	NM_001204908	100503355	Mm.484410	NM_001204908	ENSMUSG00000066797	Zfp648	Gm10178|Gm203	zinc finger protein 648	protein-coding
chr11	54214660	54215586	+	608	NA	Intergenic	Intergenic	-1835	NR_045506	71056	Mm.56332	NR_045506	ENSMUSG00000086209	4933405E24Rik	-	RIKEN cDNA 4933405E24 gene	ncRNA
chr1	154595880	154596586	+	1000	NA	intron (NM_009782, intron 6 of 46)	RMER20C_Mm|LTR|ERVK	129687	NM_009782	12290	Mm.267517	NM_009782	ENSMUSG00000004110	Cacna1e	A430040I15|BII|Cach6|Cacnl1a6|Cav2.3|Cchra1|alpha1E	calcium channel, voltage-dependent, R type, alpha 1E subunit	protein-coding
chr11	54910015	54910594	+	605	NA	TTS (NM_001199276)	TTS (NM_001199276)	7450	NM_008161	14778	Mm.200916	NM_008161	ENSMUSG00000018339	Gpx3	AA960521|EGPx|GPx|GSHPx-3|GSHPx-P	glutathione peroxidase 3	protein-coding
chr1	155237306	155237741	+	579	NA	intron (NM_001370865, intron 3 of 9)	intron (NM_001370865, intron 3 of 9)	7009	NM_001370865	207792	Mm.29270	NM_001370865	ENSMUSG00000033722	BC034090	6820428L09|mKIAA1614	cDNA sequence BC034090	protein-coding
chr11	55327962	55328621	+	678	NA	Intergenic	Intergenic	-16034	NM_001029988	245827	Mm.339363	NM_001029988	ENSMUSG00000055333	Fat2	EMI2|Fath2|Gm523|mKIAA0811	FAT atypical cadherin 2	protein-coding
chr11	55607693	55608073	+	794	NA	5' UTR (NM_020492, exon 1 of 9)	5' UTR (NM_020492, exon 1 of 9)	315	NM_001290821	14654	Mm.89320	NM_020492	ENSMUSG00000000263	Glra1	nmf11|oscillator|ot|spasmodic|spd	glycine receptor, alpha 1 subunit	protein-coding
chr11	56107628	56108228	+	615	NA	Intergenic	Intergenic	-66941	NM_153079	216749	Mm.213205	NM_153079	ENSMUSG00000037393	Nmur2	Nmu2r	neuromedin U receptor 2	protein-coding
chr11	58239110	58239741	+	848	NA	Intergenic	Intergenic	24448	NM_019440	54396	Mm.458517	NM_019440	ENSMUSG00000069874	Irgm2	AI481100|GTPI|Ifggd2|Iigp2	immunity-related GTPase family M member 2	protein-coding
chr11	58380120	58380952	+	1000	NA	promoter-TSS (NM_001330197)	promoter-TSS (NM_001330197)	-110	NM_001330197	70163	Mm.24119	NM_027339	ENSMUSG00000013643	Lypd8	2210415F13Rik	LY6/PLAUR domain containing 8	protein-coding
chr11	58954229	58955363	+	1000	NA	promoter-TSS (NR_134309)	promoter-TSS (NR_134309)	111	NM_178218	319162	Mm.212549	NM_178218	ENSMUSG00000078851	Hist3h2a	-	histone cluster 3, H2a	protein-coding
chr11	58963369	58963960	+	807	NA	promoter-TSS (NM_031172)	promoter-TSS (NM_031172)	-117	NM_031172	56631	Mm.179733	NM_031172	ENSMUSG00000036964	Trim17	Rnf16|terf	tripartite motif-containing 17	protein-coding
chr11	59201956	59202643	+	837	NA	promoter-TSS (NM_001302336)	promoter-TSS (NM_001302336)	132	NR_037964	72203	Mm.339566	NR_037964		2610507I01Rik	5033414D05Rik	RIKEN cDNA 2610507I01 gene	ncRNA
chr11	59208086	59209598	+	738	NA	exon (NM_024210, exon 2 of 7)	exon (NM_024210, exon 2 of 7)	481	NM_024210	67862	Mm.358708	NM_024210	ENSMUSG00000020441	2310033P09Rik	Mmtag2	RIKEN cDNA 2310033P09 gene	protein-coding
chr11	59263780	59264294	+	603	NA	intron (NM_009522, intron 2 of 3)	intron (NM_009522, intron 2 of 3)	26714	NM_009522	22416	Mm.1367	NM_009522	ENSMUSG00000009900	Wnt3a	Wnt-3a|vt	wingless-type MMTV integration site family, member 3A	protein-coding
chr11	59421970	59422273	+	673	NA	intron (NM_001356452, intron 3 of 4)	intron (NM_001356452, intron 3 of 4)	27913	NM_001356452	67826	Mm.26680	NM_144521	ENSMUSG00000009894	Snap47	1110031B06Rik|SNAP-47	synaptosomal-associated protein, 47	protein-coding
chr11	59471897	59472637	+	939	NA	intron (NM_178417, intron 1 of 3)	CpG	207	NM_178417	237775	Mm.339604	NM_178417	ENSMUSG00000054519	Zfp867	-	zinc finger protein 867	protein-coding
chr11	59505927	59506822	+	1000	NA	non-coding (NR_015585, exon 1 of 5)	non-coding (NR_015585, exon 1 of 5)	266	NM_172941	268417	Mm.239793	NM_172941	ENSMUSG00000020472	Zkscan17	Nizp1|Zfp496|Znf496	zinc finger with KRAB and SCAN domains 17	protein-coding
chr11	59786655	59787888	+	546	NA	promoter-TSS (NR_110894)	promoter-TSS (NR_110894)	-49	NR_110894	194908	Mm.344651	NM_183139	ENSMUSG00000043648	Pld6	4933433K01Rik|Gm10|Zuc|mZuc|mitoPLD	phospholipase D family, member 6	protein-coding
chr1	160100971	160101338	+	950	NA	intron (NM_177839, intron 18 of 21)	intron (NM_177839, intron 18 of 21)	-23169	NR_038031	75255	Mm.414845	NR_038030	ENSMUSG00000026729	4930562F07Rik	-	RIKEN cDNA 4930562F07 gene	ncRNA
chr11	6037182	6038071	+	771	NA	intron (NM_001174053, intron 1 of 19)	intron (NM_001174053, intron 1 of 19)	28122	NM_001174054	12323	Mm.439733	NM_007595	ENSMUSG00000057897	Camk2b	CaMKII	calcium/calmodulin-dependent protein kinase II, beta	protein-coding
chr11	60777185	60777756	+	859	NA	promoter-TSS (NM_009410)	promoter-TSS (NM_009410)	-55	NM_175491	237782	Mm.57726	NM_175491	ENSMUSG00000049323	Smcr8	2310076G09Rik|AI642055|D030073L15Rik	Smith-Magenis syndrome chromosome region, candidate 8 homolog (human)	protein-coding
chr11	60931442	60932431	+	1000	NA	promoter-TSS (NR_157293)	promoter-TSS (NR_157293)	-69	NR_027800	24082	Mm.46270	NM_025293	ENSMUSG00000042549	Map2k3os	F3-1|Gm16516|Gtlf3a	mitogen-activated protein kinase kinase 3, opposite strand	ncRNA
chr1	161034330	161035564	+	1000	NA	promoter-TSS (NR_151479)	promoter-TSS (NR_151479)	31	NR_153815	14455	Mm.270065	NR_002840	ENSMUSG00000053332	Gas5	Gas-5|Mir5117|Snhg2	growth arrest specific 5	ncRNA
chr1	161070367	161071176	+	934	NA	promoter-TSS (NM_172644)	promoter-TSS (NM_172644)	4	NR_131028	70454	Mm.248212	NM_027429	ENSMUSG00000026708	Cenpl	2610300B10Rik|AW121806|AW550697|CENP-L	centromere protein L	protein-coding
chr1	161621416	161621595	+	657	NA	Intergenic	Intergenic	126848	NM_183391	240873	Mm.276823	NM_183391	ENSMUSG00000066755	Tnfsf18	Gitrl|Tnlg2a	tumor necrosis factor (ligand) superfamily, member 18	protein-coding
chr1	161726108	161727662	+	626	NA	Intergenic	Intergenic	61610	NM_010177	14103	Mm.3355	NM_010177	ENSMUSG00000000817	Fasl	APT1LG1|CD178|CD95-L|CD95L|Fas-L|Faslg|Tnfsf6|Tnlg1a|gld	Fas ligand (TNF superfamily, member 6)	protein-coding
chr11	62538555	62539394	+	732	NA	exon (NM_028448, exon 1 of 5)	exon (NM_028448, exon 1 of 5)	287	NM_028448	73139	Mm.390409	NM_028448	ENSMUSG00000018509	Cenpv	3110013H01Rik|AA671303|Prr6	centromere protein V	protein-coding
chr11	62575289	62576140	+	556	NA	intron (NM_011706, intron 1 of 15)	intron (NM_011706, intron 1 of 15)	1228	NM_011706	22368	Mm.288064	NM_011706	ENSMUSG00000018507	Trpv2	GRC|OTRPC2|VRL-1|Vrl1	transient receptor potential cation channel, subfamily V, member 2	protein-coding
chr11	62731437	62732048	+	935	NA	Intergenic	CpG	-2649	NM_133208	170740	Mm.339982	NM_133208	ENSMUSG00000005267	Zfp287	B230333C16Rik|SKAT-2|Skat2|Znf287|mszf16|mszf74|zfp-287	zinc finger protein 287	protein-coding
chr11	62929773	62930347	+	844	NA	Intergenic	Intergenic	-21133	NM_025496	66338	Mm.46166	NM_025496	ENSMUSG00000042200	Cdrt4	1700019I23Rik	CMT1A duplicated region transcript 4	protein-coding
chr1	163994436	163995352	+	1000	NA	promoter-TSS (NM_027279)	promoter-TSS (NM_027279)	5	NM_027279	69962	Mm.27284	NM_027279	ENSMUSG00000041396	Mettl18	2810422O20Rik|C78571	methyltransferase like 18	protein-coding
chr1	164457824	164459017	+	578	NA	promoter-TSS (NM_009721)	promoter-TSS (NM_009721)	-65	NM_009721	11931	Mm.4550	NM_009721	ENSMUSG00000026576	Atp1b1	Atp4b|Atpb|Atpb-1|NKbeta1	ATPase, Na+/K+ transporting, beta 1 polypeptide	protein-coding
chr11	64468787	64469124	+	614	NA	intron (NM_178870, intron 1 of 1)	intron (NM_178870, intron 1 of 1)	-32281	NR_028445	654805	Mm.436132	NR_028445		F930015N05Rik	-	RIKEN cDNA F930015N05 gene	ncRNA
chr1	164887838	164888137	+	711	NA	Intergenic	MamSINE1|SINE|tRNA	24866	NR_040303	433374	Mm.251149	NR_040303	ENSMUSG00000104117	Gm20743	-	predicted gene, 20743	ncRNA
chr1	164994187	164994684	+	742	NA	Intergenic	Intergenic	-58913	NM_008510	16963	Mm.190	NM_008510	ENSMUSG00000026573	Xcl1	AI661682|ATAC|LTN|Lptn|SCM-1|SCM-1a|Scyc1	chemokine (C motif) ligand 1	protein-coding
chr1	166409127	166410047	+	719	NA	intron (NM_175170, intron 1 of 5)	CpG	241	NM_175170	71592	Mm.192094	NM_175170	ENSMUSG00000040596	Pogk	9130401E23Rik|BASS2|mKIAA1513	pogo transposable element with KRAB domain	protein-coding
chr11	66892620	66894125	+	619	NA	Intergenic	RMER1A|Other|Other	-18619	NM_178656	193003	Mm.440256	NM_178656	ENSMUSG00000048070	Pirt	A530088H08Rik	phosphoinositide-interacting regulator of transient receptor potential channels	protein-coding
chr11	66945280	66945926	+	809	NA	intron (NR_033539, intron 1 of 3)	intron (NR_033539, intron 1 of 3)	1483	NR_033539	100038666	Mm.387373	NR_033539	ENSMUSG00000072834	Gm12298	-	predicted gene 12298	ncRNA
chr11	67052267	67052998	+	1000	NA	promoter-TSS (NM_025510)	promoter-TSS (NM_025510)	-14	NM_025510	66358	Mm.22511	NM_025510	ENSMUSG00000020910	Adprm	2310004I24Rik|MDS006	ADP-ribose/CDP-alcohol diphosphatase, manganese dependent	protein-coding
chr1	16748811	16749903	+	685	NA	Intergenic	RMER1B|Other|Other	60901	NM_001159711	17087	Mm.116844	NM_016923	ENSMUSG00000025779	Ly96	ESOP-1|MD-2|MD2	lymphocyte antigen 96	protein-coding
chr11	68386614	68387208	+	810	NA	promoter-TSS (NM_008744)	promoter-TSS (NM_008744)	-85	NM_008744	18208	Mm.39095	NM_008744	ENSMUSG00000020902	Ntn1	AI561871|BC019633|Netrin-1	netrin 1	protein-coding
chr11	68888455	68888735	+	616	NA	promoter-TSS (NM_177060)	promoter-TSS (NM_177060)	42	NM_177060	320040	Mm.305696	NM_177060	ENSMUSG00000046490	Rnf222	9930039A11Rik	ring finger protein 222	protein-coding
chr11	68900951	68901883	+	993	NA	promoter-TSS (NR_003373)	promoter-TSS (NR_003373)	-149	NM_009080	19941	Mm.3229	NM_009080	ENSMUSG00000060938	Rpl26	SIG-20	ribosomal protein L26	protein-coding
chr11	68951367	68951947	+	641	NA	exon (NM_177566, exon 6 of 16)	exon (NM_177566, exon 6 of 16)	5230	NM_001364772	442801	Mm.376147	NM_177566	ENSMUSG00000052921	Arhgef15	D130071N09|D530030K12Rik|E5	Rho guanine nucleotide exchange factor (GEF) 15	protein-coding
chr11	69059279	69060799	+	1000	NA	exon (NM_028005, exon 1 of 1)	exon (NM_028005, exon 1 of 1)	264	NM_028005	71923	Mm.340257	NM_028005	ENSMUSG00000045176	Borcs6	2310047M10Rik	BLOC-1 related complex subunit 6	protein-coding
chr1	169060201	169060465	+	910	NA	Intergenic	MTEa|LTR|ERVL-MaLR	-41244	NR_105772	102466632		NR_105772	ENSMUSG00000098829	Mir6354	Gm27282|mmu-mir-6354	microRNA 6354	ncRNA
chr11	69323660	69324139	+	1000	NA	promoter-TSS (NM_172560)	promoter-TSS (NM_172560)	-26	NM_172560	216846	Mm.28774	NM_172560	ENSMUSG00000032782	Cntrob	9830165K03Rik|Lip8|Nip2	centrobin, centrosomal BRCA2 interacting protein	protein-coding
chr11	69340115	69341324	+	1000	NA	promoter-TSS (NR_027827)	promoter-TSS (NR_027827)	-50	NR_027827	80515	Mm.5324	NM_020591	ENSMUSG00000043419	Rnf227	2310043C11Rik|A030009H04Rik|AA589459|AB041807|Chd3os|MNCb-2875|RNF21	ring finger protein 227	ncRNA
chr11	69546380	69547027	+	901	NA	intron (NM_001081330, intron 1 of 85)	CpG	2405	NM_001081330	327954	Mm.247478	NM_177617	ENSMUSG00000005237	Dnah2	2900022L05Rik|4930564A01|D130094J20|D330014H01Rik|Dnahc2|Dnhd3	dynein, axonemal, heavy chain 2	protein-coding
chr11	69581387	69581634	+	821	NA	intron (NM_001127233, intron 1 of 10)	CpG	1151	NM_011640	22059	Mm.222	NM_011640	ENSMUSG00000059552	Trp53	Tp53|bbl|bfy|bhy|p44|p53	transformation related protein 53	protein-coding
chr11	69913825	69914664	+	1000	NA	TTS (NM_001291119)	TTS (NM_001291119)	224	NM_001357906	56310	Mm.477738	NM_019726	ENSMUSG00000023170	Gps2	AI505953|GPS-2	G protein pathway suppressor 2	protein-coding
chr11	69947971	69949105	+	541	NA	promoter-TSS (NM_001359114)	promoter-TSS (NM_001359114)	-341	NM_001359114	20528	Mm.10661	NM_009204	ENSMUSG00000018566	Slc2a4	GT2|Glut-4|Glut4|twgy	solute carrier family 2 (facilitated glucose transporter), member 4	protein-coding
chr11	69980045	69981613	+	1000	NA	promoter-TSS (NM_026017)	promoter-TSS (NM_026017)	-339	NM_026017	67181	Mm.41678	NM_026017	ENSMUSG00000018559	Ctdnep1	2610507E10Rik|Dullard	CTD nuclear envelope phosphatase 1	protein-coding
chr11	70020766	70021016	+	651	NA	intron (NM_001109752, intron 1 of 19)	intron (NM_001109752, intron 1 of 19)	2286	NM_001109752	13385	Mm.27256	NM_007864	ENSMUSG00000020886	Dlg4	Dlgh4|PSD-95|PSD95|SAP90|SAP90A	discs large MAGUK scaffold protein 4	protein-coding
chr11	70055642	70056410	+	596	NA	exon (NM_001291132, exon 3 of 8)	exon (NM_001291132, exon 3 of 8)	1671	NM_001291132	11889	Mm.6559	NM_009714	ENSMUSG00000020884	Asgr1	ASGPR1|Asgr|Asgr-1|HL-1	asialoglycoprotein receptor 1	protein-coding
chr11	70220711	70221416	+	1000	NA	promoter-TSS (NM_172371)	promoter-TSS (NM_172371)	-69	NM_172371	69309	Mm.93266	NM_172371	ENSMUSG00000044367	Slc16a13	1700007D07Rik	solute carrier family 16 (monocarboxylic acid transporters), member 13	protein-coding
chr11	70226187	70226779	+	774	NA	intron (NM_007528, intron 8 of 8)	CpG	3315	NM_007528	12029	Mm.12930	NM_007528	ENSMUSG00000000317	Bcl6b	Bazf	B cell CLL/lymphoma 6, member B	protein-coding
chr1	170255182	170255868	+	1000	NA	non-coding (NR_151590, exon 1 of 1)	non-coding (NR_151590, exon 1 of 1)	214	NR_151590	622708	Mm.389210	NR_151590	ENSMUSG00000096964	Gm6345	EG622708	predicted gene 6345	pseudo
chr11	70646767	70647553	+	1000	NA	promoter-TSS (NM_001316728)	promoter-TSS (NM_001316728)	-75	NM_001316728	70510	Mm.261818	NM_027445	ENSMUSG00000040746	Rnf167	0610010G05Rik|5730408C10Rik|AU019305|AV328608	ring finger protein 167	protein-coding
chr11	70653752	70654688	+	1000	NA	intron (NM_011072, intron 1 of 2)	CpG	430	NM_011072	18643	Mm.2647	NM_011072	ENSMUSG00000018293	Pfn1	Pfn	profilin 1	protein-coding
chr11	70699871	70701501	+	1000	NA	promoter-TSS (NM_001252485)	promoter-TSS (NM_001252485)	138	NM_153103	16562	Mm.99996	NM_153103	ENSMUSG00000020821	Kif1c	B430105J22Rik|D11Bwg1349e|Ltxs1|Orch3	kinesin family member 1C	protein-coding
chr1	170868552	170868935	+	973	NA	promoter-TSS (NM_001081304)	promoter-TSS (NM_001081304)	-972	NM_001081304	226641	Mm.377046	NM_001081304	ENSMUSG00000026663	Atf6	9130025P16Rik|9630036G24|AA789574|Atf6alpha|ESTM49	activating transcription factor 6	protein-coding
chr11	7088628	7089030	+	741	NA	intron (NM_009622, intron 2 of 19)	intron (NM_009622, intron 2 of 19)	25396	NM_009622	432530	Mm.259733	NM_009622	ENSMUSG00000020431	Adcy1	AC1|D11Bwg1392e|I-AC|brl	adenylate cyclase 1	protein-coding
chr1	171033511	171034054	+	613	NA	Intergenic	Intergenic	14856	NM_144559	246256	Mm.251254	NM_144559	ENSMUSG00000059089	Fcgr4	4833442P21Rik|CD16-2|FcgRIV|FcgammaRIV|Fcgr3a|Fcrl3	Fc receptor, IgG, low affinity IV	protein-coding
chr1	171280890	171281442	+	1000	NA	promoter-TSS (NM_008911)	promoter-TSS (NM_008911)	20	NM_008911	19044	Mm.266888	NM_008911	ENSMUSG00000062729	Ppox	Ppo	protoporphyrinogen oxidase	protein-coding
chr1	171345249	171346126	+	796	NA	promoter-TSS (NM_011070)	promoter-TSS (NM_011070)	12	NM_011070	18637	Mm.10756	NM_011070	ENSMUSG00000006412	Pfdn2	ESTM27|W48336	prefoldin 2	protein-coding
chr1	171424921	171425456	+	828	NA	intron (NR_151523, intron 1 of 1)	intron (NR_151523, intron 1 of 1)	6155	NM_001164525	226654	Mm.46366	NM_001164525	ENSMUSG00000103711	Tstd1	AV065366|EG226654|Gm4848|KAT	thiosulfate sulfurtransferase (rhodanese)-like domain containing 1	protein-coding
chr11	71847408	71848296	+	693	NA	Intergenic	Intergenic	92270	NR_045942	73816	Mm.390391	NR_045942	ENSMUSG00000085528	4930401O10Rik	-	RIKEN cDNA 4930401O10 gene	ncRNA
chr11	72411078	72411953	+	765	NA	exon (NM_177776, exon 1 of 8)	exon (NM_177776, exon 1 of 8)	198	NM_177776	276829	Mm.46732	NM_177776	ENSMUSG00000045667	Smtnl2	D130058I21Rik	smoothelin-like 2	protein-coding
chr1	172528736	172529131	+	692	NA	intron (NM_027972, intron 2 of 11)	intron (NM_027972, intron 2 of 11)	7803	NM_027972	71870	Mm.78373	NM_027972	ENSMUSG00000026546	Cfap45	1700028D05Rik|Ccdc19|Nesg1	cilia and flagella associated protein 45	protein-coding
chr11	72578478	72578824	+	799	NA	Intergenic	Intergenic	-28405	NM_029932	77577	Mm.46185	NM_029932	ENSMUSG00000020798	Spns3	9830002I17Rik	spinster homolog 3	protein-coding
chr1	172592306	172592947	+	1000	NA	Intergenic	Intergenic	-2058	NM_029084	74748	Mm.179812	NM_029084	ENSMUSG00000053318	Slamf8	5830408F06Rik|Blame|SBBI42	SLAM family member 8	protein-coding
chr1	172870046	172870689	+	1000	NA	Intergenic	RMER19B|LTR|ERVK	24687	NM_011318	20219	Mm.330510	NM_011318	ENSMUSG00000026542	Apcs	Sap	serum amyloid P-component	protein-coding
chr1	172960461	172960793	+	1000	NA	Intergenic	Intergenic	3859	NM_008763	18313	Mm.377103	NM_008763	ENSMUSG00000037924	Olfr16	MOR23|MOR26713	olfactory receptor 16	protein-coding
chr11	72960702	72961554	+	548	NA	promoter-TSS (NM_016745)	promoter-TSS (NM_016745)	-41	NM_001163336	53313	Mm.6306	NM_016745	ENSMUSG00000020788	Atp2a3	SERCA3b|Serca3	ATPase, Ca++ transporting, ubiquitous	protein-coding
chr11	73169299	73169526	+	540	NA	intron (NM_033321, intron 10 of 12)	intron (NM_033321, intron 10 of 12)	7596	NM_001168470	66048	Mm.73608	NM_025318	ENSMUSG00000047260	Emc6	0610009E20Rik|0610025L18Rik|Tmem93	ER membrane protein complex subunit 6	protein-coding
chr11	73193046	73193390	+	704	NA	intron (NM_031251, intron 2 of 10)	intron (NM_031251, intron 2 of 10)	5801	NM_031251	83429	Mm.259852	NM_031251	ENSMUSG00000005949	Ctns	AI195360|AW049661	cystinosis, nephropathic	protein-coding
chr11	73283560	73284237	+	894	NA	intron (NR_163834, intron 8 of 17)	intron (NR_163834, intron 8 of 17)	16378	NM_145099	246788	Mm.75196	NM_145099	ENSMUSG00000043029	Trpv3	1110036I10Rik|AI644701|Nh|VRL3	transient receptor potential cation channel, subfamily V, member 3	protein-coding
chr1	173366634	173368203	+	651	NA	exon (NM_053199, exon 1 of 9)	exon (NM_053199, exon 1 of 9)	277	NM_053199	94332	Mm.330524	NM_053199	ENSMUSG00000005338	Cadm3	BIgR|Igsf4b|Necl-1|Necl1|SynCAM3|Tsll1	cell adhesion molecule 3	protein-coding
chr1	173846258	173846930	+	651	NA	Intergenic	Intergenic	33593	NM_001170853	100040462	Mm.463437	NM_001170853	ENSMUSG00000090272	Mndal	Gm2785|Ifi212	myeloid nuclear differentiation antigen like	protein-coding
chr11	74925482	74926627	+	1000	NA	promoter-TSS (NM_001362743)	promoter-TSS (NM_001362743)	-106	NM_001362743	27364	Mm.131443	NM_013761	ENSMUSG00000001323	Srr	M100034|Rgsc34|Srs	serine racemase	protein-coding
chr11	75169077	75169331	+	625	NA	exon (NM_010430, exon 1 of 2)	exon (NM_010430, exon 1 of 2)	1051	NM_010430	15248	Mm.57250	NM_010430	ENSMUSG00000043099	Hic1	AA408311|HIC-1	hypermethylated in cancer 1	protein-coding
chr1	175491759	175493064	+	804	NA	5' UTR (NM_011880, exon 1 of 17)	5' UTR (NM_011880, exon 1 of 17)	134	NM_001347195	24012	Mm.7956	NM_011880	ENSMUSG00000026527	Rgs7	-	regulator of G protein signaling 7	protein-coding
chr11	75551240	75552616	+	943	NA	TTS (NR_039553)	TTS (NR_039553)	499	NR_039553	100628624		NR_039553	ENSMUSG00000093100	Mir3971	mmu-mir-3971|mu-mir-3971	microRNA 3971	ncRNA
chr11	75861244	75861559	+	982	NA	intron (NM_029548, intron 4 of 7)	intron (NM_029548, intron 4 of 7)	49658	NM_029548	380714	Mm.425697	NM_029548	ENSMUSG00000020847	Rph3al	Gm1753|Noc2	rabphilin 3A-like (without C2 domains)	protein-coding
chr1	176274409	176275644	+	592	NA	5' UTR (NM_176916, exon 1 of 10)	5' UTR (NM_176916, exon 1 of 10)	286	NM_001357844	319455	Mm.338001	NM_176916	ENSMUSG00000055214	Pld5	B230365F16Rik	phospholipase D family, member 5	protein-coding
chr11	76694176	76694343	+	620	NA	exon (NM_177709, exon 2 of 3)	exon (NM_177709, exon 2 of 3)	14386	NM_177709	237858	Mm.127006	NM_177709	ENSMUSG00000046275	Trarg1	C130069F04Rik|DSPB1|Lost1|Tusc5	trafficking regulator of GLUT4 (SLC2A4) 1	protein-coding
chr11	76911279	76911725	+	639	NA	intron (NM_025655, intron 3 of 5)	intron (NM_025655, intron 3 of 5)	6957	NM_025655	66601	Mm.25138	NM_025655	ENSMUSG00000020839	Tmigd1	2010002A20Rik|Tmigd	transmembrane and immunoglobulin domain containing 1	protein-coding
chr11	77515019	77515506	+	585	NA	exon (NM_026185, exon 1 of 2)	exon (NM_026185, exon 1 of 2)	145	NM_026185	67477	Mm.432526	NM_026185	ENSMUSG00000000686	Abhd15	1300007F04Rik	abhydrolase domain containing 15	protein-coding
chr11	78188257	78189630	+	884	NA	5' UTR (NM_033475, exon 1 of 10)	5' UTR (NM_033475, exon 1 of 10)	195	NM_033475	19376	Mm.275864	NM_033475	ENSMUSG00000002059	Rab34	AI326479|Narr|Rah|Rah1	RAB34, member RAS oncogene family	protein-coding
chr11	78322912	78323308	+	867	NA	promoter-TSS (NM_001303423)	promoter-TSS (NM_001303423)	37	NM_001303423	11676	Mm.7729	NM_009657	ENSMUSG00000017390	Aldoc	AI847350|AU040929|Aldo3|Scrg2	aldolase C, fructose-bisphosphate	protein-coding
chr11	78386460	78387227	+	715	NA	promoter-TSS (NM_001277290)	promoter-TSS (NM_001277290)	-235	NM_001277290	15218	Mm.4496	NM_008238	ENSMUSG00000002057	Foxn1	D11Bhm185e|Fkh19|HFH-11|Hfh11|Whn|nu|nude	forkhead box N1	protein-coding
chr11	78496997	78498143	+	1000	NA	5' UTR (NM_172795, exon 1 of 9)	5' UTR (NM_172795, exon 1 of 9)	184	NM_172795	237868	Mm.210332	NM_172795	ENSMUSG00000050132	Sarm1	A830091I15Rik|C78606|MyD885|Sarm	sterile alpha and HEAT/Armadillo motif containing 1	protein-coding
chr11	78512021	78512713	+	1000	NA	promoter-TSS (NM_026389)	promoter-TSS (NM_026389)	71	NM_026389	67811	Mm.197493	NM_026389	ENSMUSG00000001100	Poldip2	1300003F06Rik|Pdip38	polymerase (DNA-directed), delta interacting protein 2	protein-coding
chr11	78535971	78536772	+	1000	NA	promoter-TSS (NM_001159392)	promoter-TSS (NM_001159392)	10	NM_018854	55978	Mm.358671	NM_018854	ENSMUSG00000001105	Ift20	0610009H04Rik|AU015496|mIFT20	intraflagellar transport 20	protein-coding
chr11	78826399	78826893	+	867	NA	promoter-TSS (NM_001076681)	promoter-TSS (NM_001076681)	51	NM_001076681	66274	Mm.258932	NM_001076681	ENSMUSG00000072640	Lyrm9	1810012P15Rik	LYR motif containing 9	protein-coding
chr11	78984802	78985284	+	648	NA	promoter-TSS (NM_010708)	promoter-TSS (NM_010708)	-119	NM_010708	16859	Mm.341434	NM_010708	ENSMUSG00000001123	Lgals9	AA407335|AI194909|AI265545|LGALS35|Lgals5|gal-9|galectin-9	lectin, galactose binding, soluble 9	protein-coding
chr11	79146017	79146746	+	930	NA	promoter-TSS (NM_013571)	promoter-TSS (NM_013571)	92	NM_013571	16706	Mm.4745	NM_013571	ENSMUSG00000018334	Ksr1	AW492498|B-KSR1|D11Bhm183e|D11Bhm184e|Ksr|RSU2|hb|mKSR1	kinase suppressor of ras 1	protein-coding
chr11	79590777	79591566	+	906	NA	promoter-TSS (NM_175543)	promoter-TSS (NM_175543)	-41	NM_175543	268451	Mm.130656	NM_175543	ENSMUSG00000017639	Rab11fip4	A730072L08Rik|RAB11-FIP4|mKIAA1821	RAB11 family interacting protein 4 (class II)	protein-coding
chr11	79790183	79790813	+	562	NA	Intergenic	Intergenic	64098	NR_029959	723853		NR_029959	ENSMUSG00000065489	Mir365-2	Mirn365-2|mir-365-2	microRNA 365-2	ncRNA
chr11	80141790	80142552	+	1000	NA	promoter-TSS (NM_183275)	promoter-TSS (NM_183275)	-18	NM_183275	68550	Mm.18466	NM_183275	ENSMUSG00000046909	Tefm	1110002N22Rik	transcription elongation factor, mitochondrial	protein-coding
chr1	180942154	180942973	+	826	NA	promoter-TSS (NM_144794)	promoter-TSS (NM_144794)	45	NM_144794	208795	Mm.185518	NM_144794	ENSMUSG00000026519	Tmem63a	BC014795|Tmem64a	transmembrane protein 63a	protein-coding
chr1	181352271	181354076	+	909	NA	5' UTR (NM_001160211, exon 1 of 6)	5' UTR (NM_001160211, exon 1 of 6)	545	NM_001160211	72978	Mm.338083	NM_028408	ENSMUSG00000026514	Cnih3	2900075G08Rik|CNIH-3	cornichon family AMPA receptor auxiliary protein 3	protein-coding
chr1	182189407	182190319	+	1000	NA	Intergenic	Intergenic	-31765	NM_001166728	625823	Mm.479992	NM_001166728	ENSMUSG00000091013	Vmn1r1	EG625823|Gm6628	vomeronasal 1 receptor 1	protein-coding
chr11	82283935	82284443	+	545	NA	Intergenic	Intergenic	-104377	NM_011329	20290	Mm.1283	NM_011329	ENSMUSG00000020702	Ccl1	BF534335|I-309|P500|Scya1|Tca-3|Tca3	chemokine (C-C motif) ligand 1	protein-coding
chr1	182592569	182593109	+	570	NA	intron (NM_130890, intron 2 of 20)	intron (NM_130890, intron 2 of 20)	27832	NM_001145806	170725	Mm.189201	NM_130890	ENSMUSG00000038599	Capn8	nCL-2|nCL-2'	calpain 8	protein-coding
chr11	82763771	82764859	+	1000	NA	promoter-TSS (NM_025884)	promoter-TSS (NM_025884)	6	NM_009839	12467	Mm.4126	NM_009839	ENSMUSG00000020698	Cct6b	CCT-zeta-2|CCTzeta-2|Cctz-2|TCP-1-zeta-2	chaperonin containing Tcp1, subunit 6b (zeta)	protein-coding
chr11	82907875	82908523	+	873	NA	exon (NM_145431, exon 2 of 13)	exon (NM_145431, exon 2 of 13)	196	NM_145431	217011	Mm.29176	NM_145431	ENSMUSG00000020692	Nle1	AL022765|BC018399|Nle|l11Jus1|l11Jus4	notchless homolog 1	protein-coding
chr11	82910618	82910860	+	546	NA	promoter-TSS (NM_178680)	promoter-TSS (NM_178680)	-514	NM_178680	217012	Mm.295205	NM_178680	ENSMUSG00000018845	Unc45b	AA445617|Cmya4|D230041A13Rik|Unc45	unc-45 myosin chaperone B	protein-coding
chr11	82947250	82947877	+	902	NA	intron (NR_045932, intron 1 of 2)	intron (NR_045932, intron 1 of 2)	-4539	NM_183201	327978	Mm.42147	NM_183201	ENSMUSG00000054404	Slfn5	AI956840	schlafen 5	protein-coding
chr11	83303836	83304130	+	1000	NA	intron (NM_001035854, intron 1 of 21)	intron (NM_001035854, intron 1 of 21)	1286	NM_001035854	71770	Mm.39053	NM_027915	ENSMUSG00000035152	Ap2b1	1300012O03Rik|AI788979|AP105B	adaptor-related protein complex 2, beta 1 subunit	protein-coding
chr11	83409209	83410148	+	900	NA	promoter-TSS (NM_001361568)	promoter-TSS (NM_001361568)	-10	NM_001361567	276952	Mm.66275	NM_001013386	ENSMUSG00000020684	Rasl10b	B230331P10Rik|Gm729|VTS58635	RAS-like, family 10, member B	protein-coding
chr11	83597895	83598723	+	898	NA	intron (NR_036452, intron 1 of 8)	intron (NR_036452, intron 1 of 8)	-5222	NM_009139	20305	Mm.137	NM_009139	ENSMUSG00000018927	Ccl6	MRP-1|Scya6|c10	chemokine (C-C motif) ligand 6	protein-coding
chr11	83789232	83789622	+	560	NA	Intergenic	Intergenic	35790	NM_145432	217026	Mm.117874	NM_145432	ENSMUSG00000000976	Heatr6	2700008B19Rik|BB135312|BB249351	HEAT repeat containing 6	protein-coding
chr11	83964008	83964775	+	1000	NA	promoter-TSS (NM_194341)	promoter-TSS (NM_194341)	-40	NM_194341	217030	Mm.82680	NM_194341	ENSMUSG00000034940	Synrg	Ap1gbp1|SYNG	synergin, gamma	protein-coding
chr1	184963003	184963748	+	628	NA	intron (NM_145515, intron 1 of 17)	L2|LINE|L2	36174	NM_145515	226778	Mm.7445	NM_145515	ENSMUSG00000026620	Mark1	AW491150|B930025N23Rik|Emk3|Par-1c|mKIAA1477|mPar-1c	MAP/microtubule affinity regulating kinase 1	protein-coding
chr1	185331961	185332462	+	1000	NA	promoter-TSS (NM_011794)	promoter-TSS (NM_011794)	52	NM_001347210	23827	Mm.227549	NM_011794	ENSMUSG00000026617	Bpnt1	BPntase	bisphosphate 3'-nucleotidase 1	protein-coding
chr1	185454479	185455605	+	616	NA	non-coding (NR_040305, exon 1 of 3)	non-coding (NR_040305, exon 1 of 3)	194	NM_001033286	226781	Mm.227117	NM_001033286	ENSMUSG00000026614	Slc30a10	E130106K10Rik|Gm212	solute carrier family 30, member 10	protein-coding
chr11	85792708	85793205	+	1000	NA	non-coding (NR_077059, exon 5 of 5)	non-coding (NR_077059, exon 5 of 5)	-17276	NR_046194	78420	Mm.488197	NR_046194	ENSMUSG00000085514	Bcas3os2	9530048J24Rik	breast carcinoma amplified sequence 3 opposite strand 2	ncRNA
chr11	85844026	85844390	+	720	NA	Intergenic	CpG	11593	NM_009324	21385	Mm.287052	NM_009324	ENSMUSG00000000093	Tbx2	-	T-box 2	protein-coding
chr11	85885580	85886644	+	554	NA	promoter-TSS (NM_011536)	promoter-TSS (NM_011536)	-255	NM_011536	21387	Mm.275336	NM_011536	ENSMUSG00000000094	Tbx4	3930401C23	T-box 4	protein-coding
chr1	186705139	186705901	+	647	NA	5' UTR (NM_009367, exon 1 of 7)	5' UTR (NM_009367, exon 1 of 7)	469	NM_009367	21808	Mm.18213	NM_009367	ENSMUSG00000039239	Tgfb2	BB105277|Tgf-beta2|Tgfb-2	transforming growth factor, beta 2	protein-coding
chr11	86993061	86994226	+	739	NA	5' UTR (NM_001005341, exon 1 of 5)	5' UTR (NM_001005341, exon 1 of 5)	119	NM_001005341	77864	Mm.191894	NM_001005341	ENSMUSG00000018427	Ypel2	6430570G24|E130113K08Rik	yippee like 2	protein-coding
chr11	87086337	87086939	+	877	NA	exon (NM_024262, exon 1 of 4)	exon (NM_024262, exon 1 of 4)	139	NM_024262	74133	Mm.23257	NM_024262	ENSMUSG00000020495	Smg8	1200011M11Rik	smg-8 homolog, nonsense mediated mRNA decay factor (C. elegans)	protein-coding
chr11	87358300	87359338	+	966	NA	exon (NM_177167, exon 1 of 7)	exon (NM_177167, exon 1 of 7)	175	NM_177167	320472	Mm.341988	NM_177167	ENSMUSG00000046442	Ppm1e	AW049266|B930008A12Rik|POPX1|PP2CH|mKIAA1072	protein phosphatase 1E (PP2C domain containing)	protein-coding
chr11	87623218	87623509	+	595	NA	intron (NM_001045527, intron 2 of 5)	B3A|SINE|B2	6199	NM_001045527	327992	Mm.390371	NM_001045527	ENSMUSG00000070345	Hsf5	Gm739|MLZ-220	heat shock transcription factor family member 5	protein-coding
chr11	88294098	88294569	+	543	NA	exon (NM_028859, exon 1 of 1)	exon (NM_028859, exon 1 of 1)	290	NM_028859	74297	Mm.207320	NM_028859	ENSMUSG00000034031	Ccdc182	1700106J16Rik	coiled-coil domain containing 182	protein-coding
chr11	89432843	89433131	+	674	NA	intron (NM_001327810, intron 14 of 19)	intron (NM_001327810, intron 14 of 19)	-14039	NM_172534	382543	Mm.60997	NM_172534	ENSMUSG00000047773	Ankfn1	4932411E22Rik|Gm1175|nmf9	ankyrin-repeat and fibronectin type III domain containing 1	protein-coding
chr11	9048392	9049287	+	649	NA	5' UTR (NM_001037928, exon 1 of 7)	5' UTR (NM_001037928, exon 1 of 7)	152	NM_177576	194974	Mm.79210	NM_177576	ENSMUSG00000040985	Sun3	Sunc1	Sad1 and UNC84 domain containing 3	protein-coding
chr11	90538743	90539184	+	1000	NA	intron (NM_011505, intron 14 of 17)	intron (NM_011505, intron 14 of 17)	99145	NM_011505	20913	Mm.207203	NM_011505	ENSMUSG00000020546	Stxbp4	6030470M02Rik|Synip	syntaxin binding protein 4	protein-coding
chr1	191325734	191326900	+	900	NA	intron (NM_025864, intron 1 of 7)	CpG	415	NM_025864	66950	Mm.236300	NM_025864	ENSMUSG00000026627	Pacc1	2310028N02Rik|AI118576|Tmem206	proton activated chloride channel 1	protein-coding
chr1	191574987	191576226	+	1000	NA	promoter-TSS (NM_001305233)	promoter-TSS (NM_001305233)	-30	NM_001306204	77065	Mm.338175	NM_178632	ENSMUSG00000037461	Ints7	5930412E23Rik|int7	integrator complex subunit 7	protein-coding
chr11	93098838	93099806	+	645	NA	promoter-TSS (NM_028296)	promoter-TSS (NM_028296)	32	NM_028296	72605	Mm.342160	NM_028296	ENSMUSG00000056158	Car10	2700029L05Rik|BB085816|Ca10	carbonic anhydrase 10	protein-coding
chr1	193875328	193875727	+	959	NA	Intergenic	Intergenic	347232	NR_040477	74942	Mm.60689	NR_040477	ENSMUSG00000103692	4930503O07Rik	-	RIKEN cDNA 4930503O07 gene	ncRNA
chr11	94231529	94232130	+	618	NA	Intergenic	Intergenic	10750	NM_181819	278507	Mm.342216	NM_181819	ENSMUSG00000044177	Wfikkn2	2610304F08Rik|AY100450|Gasp1|WFIKKNRP	WAP, follistatin/kazal, immunoglobulin, kunitz and netrin domain containing 2	protein-coding
chr11	94363623	94364577	+	586	NA	exon (NM_001363189, exon 15 of 31)	exon (NM_001363189, exon 15 of 31)	28890	NM_001363187	76408	Mm.23942	NM_029600	ENSMUSG00000020865	Abcc3	1700019L09Rik|ABC31|MLP2|MOAT-D|MRP3	ATP-binding cassette, sub-family C (CFTR/MRP), member 3	protein-coding
chr11	94521138	94521873	+	789	NA	promoter-TSS (NM_170671)	promoter-TSS (NM_170671)	-3	NM_170671	104601	Mm.84725	NM_170671	ENSMUSG00000039110	Mycbpap	4932408B01Rik|AMAP-1|AW125474	MYCBP associated protein	protein-coding
chr11	94601391	94602213	+	688	NA	promoter-TSS (NM_153807)	promoter-TSS (NM_153807)	-16	NM_153807	264895	Mm.386885	NM_153807	ENSMUSG00000076435	Acsf2	-	acyl-CoA synthetase family member 2	protein-coding
chr11	94785302	94786362	+	570	NA	Intergenic	Intergenic	-3129	NM_001034896	544806	Mm.379774	NM_001034896	ENSMUSG00000075610	Tmem92	AU016430|Tmem92-ps	transmembrane protein 92	protein-coding
chr11	9497195	9497935	+	1000	NA	intron (NM_178259, intron 42 of 61)	MLT1B|LTR|ERVL-MaLR	305623	NM_178259	268379	Mm.39270	NM_178259	ENSMUSG00000004668	Abca13	9830132L24|A930002G16Rik|AI956815	ATP-binding cassette, sub-family A (ABC1), member 13	protein-coding
chr11	94992958	94993328	+	638	NA	intron (NM_172261, intron 1 of 9)	intron (NM_172261, intron 1 of 9)	1931	NM_172261	217124	Mm.229087	NM_172261	ENSMUSG00000038976	Ppp1r9b	SPL|Spn	protein phosphatase 1, regulatory subunit 9B	protein-coding
chr1	195033955	195034318	+	1000	NA	non-coding (NR_015566, exon 8 of 8)	non-coding (NR_015566, exon 8 of 8)	-2904	NR_029809	723963		NR_029809	ENSMUSG00000065412	Mir29b-2	Mirn29b-2|mir-29b-2	microRNA 29b-2	ncRNA
chr1	195091934	195092668	+	869	NA	promoter-TSS (NR_132621)	promoter-TSS (NR_132621)	-53	NM_010778	17221	Mm.12884	NM_010778	ENSMUSG00000016493	Cd46	Mcp	CD46 antigen, complement regulatory protein	protein-coding
chr11	95145843	95146490	+	551	NA	promoter-TSS (NM_007867)	promoter-TSS (NM_007867)	-365	NM_007867	13394	Mm.439766	NM_007867	ENSMUSG00000020871	Dlx4	Dlx-4|Dlx7	distal-less homeobox 4	protein-coding
chr11	95336634	95337734	+	1000	NA	exon (NM_172543, exon 1 of 8)	exon (NM_172543, exon 1 of 8)	166	NM_172543	215512	Mm.262113	NM_172543	ENSMUSG00000038893	Fam117a	5730593F17Rik|AW548096	family with sequence similarity 117, member A	protein-coding
chr11	95560598	95561130	+	1000	NA	Intergenic	Intergenic	26834	NM_033217	18053	Mm.283893	NM_033217	ENSMUSG00000000120	Ngfr	LNGFR|Tnfrsf16|p75|p75NGFR|p75NTR	nerve growth factor receptor (TNFR superfamily, member 16)	protein-coding
chr11	95666603	95667595	+	1000	NA	intron (NM_008831, intron 1 of 6)	intron (NM_008831, intron 1 of 6)	142	NM_008831	18673	Mm.263862	NM_008831	ENSMUSG00000038845	Phb	Bap32	prohibitin	protein-coding
chr11	95777543	95778192	+	786	NA	Intergenic	ID_B1|SINE|B4	28800	NM_201609	268469	Mm.389038	NM_201609	ENSMUSG00000075595	Zfp652	9530033F24Rik|ZNF652	zinc finger protein 652	protein-coding
chr11	95914230	95914961	+	667	NA	intron (NM_008081, intron 1 of 10)	CpG	276	NM_008081	14422	Mm.340702	NM_008081	ENSMUSG00000013418	B4galnt2	AI593864|Dlb-1|Dlb1|Galg2|Galgt2|Ggm3|Igf2bp1	beta-1,4-N-acetyl-galactosaminyl transferase 2	protein-coding
chr11	96260310	96260688	+	864	NA	intron (NR_037977, intron 1 of 2)	intron (NR_037977, intron 1 of 2)	-4665	NR_029721	387191		NR_029721	ENSMUSG00000065546	Mir196a-1	Mirn196|Mirn196a-1|miR-196|mir-196a-1	microRNA 196a-1	ncRNA
chr11	96318569	96319317	+	855	NA	exon (NM_010459, exon 1 of 2)	exon (NM_010459, exon 1 of 2)	676	NM_010459	15412	Mm.3546	NM_010459	ENSMUSG00000038692	Hoxb4	Hox-2.6	homeobox B4	protein-coding
chr11	97041306	97041752	+	760	NA	promoter-TSS (NM_027026)	promoter-TSS (NM_027026)	-53	NM_001357808	107732	Mm.208946	NM_026154	ENSMUSG00000001445	Mrpl10	0610040E02Rik|C78440|L10mt|MRP-L8|Rpml8	mitochondrial ribosomal protein L10	protein-coding
chr11	97138848	97139323	+	558	NA	exon (NM_198100, exon 8 of 9)	exon (NM_198100, exon 8 of 9)	7334	NR_106094	102466822		NR_106094	ENSMUSG00000099286	Mir7235	Gm27986|mmu-mir-7235	microRNA 7235	ncRNA
chr11	97150455	97151173	+	713	NA	Intergenic	CpG	-1102	NM_198100	73174	Mm.27882	NM_198100	ENSMUSG00000038517	Tbkbp1	3110043L15Rik|ProSAPiP2|SINTBAD	TBK1 binding protein 1	protein-coding
chr11	97574740	97575994	+	933	NA	promoter-TSS (NM_018873)	promoter-TSS (NM_018873)	-241	NM_018873	56013	Mm.342665	NM_018873	ENSMUSG00000038453	Srcin1	P140|SNIP|mKIAA1684|p140Cap	SRC kinase signaling inhibitor 1	protein-coding
chr11	97628343	97629972	+	972	NA	exon (NM_175332, exon 1 of 1)	exon (NM_175332, exon 1 of 1)	559	NM_175332	103551	Mm.24506	NM_175332	ENSMUSG00000043439	Epop	AA409164|AI413509|AW539173|E13|E130012A19Rik|esPRC2p48	elongin BC and polycomb repressive complex 2 associated protein	protein-coding
chr11	97660123	97660646	+	613	NA	Intergenic	CpG	-3028	NM_139311	246198	Mm.23685	NM_139311	ENSMUSG00000038437	Mllt6	AI315037|Af17	myeloid/lymphoid or mixed-lineage leukemia; translocated to, 6	protein-coding
chr11	98022270	98023052	+	595	NA	promoter-TSS (NM_001159319)	promoter-TSS (NM_001159319)	-34	NM_001282977	12295	Mm.41252	NM_031173	ENSMUSG00000020882	Cacnb1	CAB1|Cchb1|Cchlb1	calcium channel, voltage-dependent, beta 1 subunit	protein-coding
chr11	98391926	98392358	+	806	NA	intron (NM_001033537, intron 3 of 7)	intron (NM_001033537, intron 3 of 7)	5519	NM_008890	18948	Mm.57030	NM_008890	ENSMUSG00000038216	Pnmt	Pent	phenylethanolamine-N-methyltransferase	protein-coding
chr11	98400121	98400622	+	884	NA	exon (NM_001033537, exon 1 of 8)	exon (NM_001033537, exon 1 of 8)	119	NM_001033537	320655	Mm.86519	NM_001033537	ENSMUSG00000038208	Pgap3	CAB2|D430035D22Rik|Perld1	post-GPI attachment to proteins 3	protein-coding
chr11	98788885	98789201	+	944	NA	Intergenic	Intergenic	-6473	NM_001361931	74026	Mm.258352	NM_028722	ENSMUSG00000052915	Msl1	2810017F12Rik|4121402D02Rik|4930463F05Rik|AA682082|Msl-1	male specific lethal 1	protein-coding
chr11	98809558	98810252	+	1000	NA	promoter-TSS (NM_138660)	promoter-TSS (NM_138660)	97	NM_138660	192160	Mm.40120	NM_138660	ENSMUSG00000078676	Casc3	Btz|Mln51	cancer susceptibility candidate 3	protein-coding
chr11	99023898	99024511	+	899	NA	promoter-TSS (NM_011623)	promoter-TSS (NM_011623)	-15	NM_011623	21973	Mm.4237	NM_011623	ENSMUSG00000020914	Top2a	Top-2	topoisomerase (DNA) II alpha	protein-coding
chr11	99041159	99042012	+	792	NA	exon (NM_010517, exon 1 of 4)	exon (NM_010517, exon 1 of 4)	341	NM_010517	16010	Mm.233799	NM_010517	ENSMUSG00000017493	Igfbp4	AI875747|Deb2|IBP-4|IGFBP-4	insulin-like growth factor binding protein 4	protein-coding
chr11	99385927	99386767	+	671	NA	intron (NM_010660, intron 6 of 7)	intron (NM_010660, intron 6 of 7)	3017	NM_010660	16661	Mm.22662	NM_010660	ENSMUSG00000019761	Krt10	D130054E02Rik|K10|K1C1|Krt-1.10|Krt1-10	keratin 10	protein-coding
chr11	99414516	99415098	+	669	NA	TTS (NM_010661)	TTS (NM_010661)	-2436	NR_153851	353123		NR_153851	ENSMUSG00000084890	A830036E02Rik	-	RIKEN cDNA A830036E02 gene	ncRNA
chr11	99614403	99614930	+	736	NA	exon (NM_027800, exon 1 of 1)	exon (NM_027800, exon 1 of 1)	180	NM_027800	71453	Mm.51510	NM_027800	ENSMUSG00000060756	Krtap2-4	5530401P19Rik|KAP2.4|KRTAP2.4	keratin associated protein 2-4	protein-coding
chr11	99619947	99620435	+	815	NA	exon (NM_001177537, exon 1 of 1)	exon (NM_001177537, exon 1 of 1)	213	NM_001177537	100502803	Mm.351892	NM_001177537	ENSMUSG00000062278	Gm11562	-	predicted gene 11562	protein-coding
chr11	99985273	99986591	+	577	NA	exon (NM_001256057, exon 1 of 1)	exon (NM_001256057, exon 1 of 1)	661	NM_001256057	100504183	Mm.426560	NM_001256057	ENSMUSG00000078253	Krtap16-1	Gm11570	keratin associated protein 16-1	protein-coding
chr1	20870930	20871310	+	635	NA	Intergenic	Intergenic	19353	NR_040492	77741	Mm.159984	NR_040492	ENSMUSG00000097934	6720483E21Rik	-	RIKEN cDNA 6720483E21 gene	ncRNA
chr12	102080599	102081309	+	560	NA	Intergenic	Intergenic	-47773	NM_001362345	238384	Mm.312448	NM_172152	ENSMUSG00000041771	Slc24a4	A930002M03Rik|AW492432|NCKX4	solute carrier family 24 (sodium/potassium/calcium exchanger), member 4	protein-coding
chr12	102948586	102949380	+	826	NA	5' UTR (NM_001081017, exon 1 of 49)	5' UTR (NM_001081017, exon 1 of 49)	124	NM_001081017	217843	Mm.387073	NM_177621	ENSMUSG00000021198	Unc79	9030205A07Rik|Mlca3	unc-79 homolog	protein-coding
chr12	103241760	103242577	+	551	NA	promoter-TSS (NM_133364)	promoter-TSS (NM_133364)	-22	NM_133364	170952	Mm.217019	NM_133364	ENSMUSG00000041669	Prima1	B230212M13Rik|BB120497|PRiMA	proline rich membrane anchor 1	protein-coding
chr12	103281133	103281819	+	993	NA	Intergenic	Intergenic	33293	NR_136894	102632488	Mm.109435	NR_136894	ENSMUSG00000100789	Gm29508	-	predicted gene 29508	ncRNA
chr12	103325341	103325816	+	893	NA	exon (NM_023049, exon 8 of 10)	exon (NM_023049, exon 8 of 10)	10619	NM_001195726	100504156	Mm.425749	NM_001195726	ENSMUSG00000096753	Fam181a	EG544888	family with sequence similarity 181, member A	protein-coding
chr12	103437572	103437900	+	579	NA	intron (NM_194067, intron 4 of 5)	intron (NM_194067, intron 4 of 5)	3547	NM_194068	52668	Mm.2121	NM_026790	ENSMUSG00000064215	Ifi27	1110013J02Rik|2900026P10Rik|D12Ertd647e|ISG12a|Ifi27l1	interferon, alpha-inducible protein 27	protein-coding
chr12	10374728	10375318	+	593	NA	exon (NM_027588, exon 4 of 9)	exon (NM_027588, exon 4 of 9)	5052	NM_001310582	70881	Mm.272843	NM_027588	ENSMUSG00000020622	Nt5c1b	4921514H13Rik|AIRP|CN-IB|cN1B	5'-nucleotidase, cytosolic IB	protein-coding
chr12	103917481	103918301	+	821	NA	Intergenic	RMER1B|Other|Other	-12941	NM_009245	20702	Mm.439692	NM_009245	ENSMUSG00000079015	Serpina1c	Pi3|Pi6|Skalp|Spi1-3|Spi1-6|Wap3	serine (or cysteine) peptidase inhibitor, clade A, member 1C	protein-coding
chr12	104064650	104065642	+	1000	NA	Intergenic	Intergenic	-12813	NR_002861	321018	Mm.297023	NR_002861		Serpina4-ps1	KALps|Klst	serine (or cysteine) peptidase inhibitor, clade A, member 4, pseudogene 1	pseudo
chr12	104181225	104181961	+	654	NA	Intergenic	Intergenic	-27721	NM_008458	16625	Mm.422814	NM_008458	ENSMUSG00000066361	Serpina3c	1A1|Kalbp|Klkbp|spi2	serine (or cysteine) peptidase inhibitor, clade A, member 3C	protein-coding
chr12	104186252	104186787	+	1000	NA	Intergenic	L1MB5|LINE|L1	-27935	NM_009251	20715	Mm.312628	NM_009251		Serpina3g	2A2|AI119734|Spi2-1|Spi2/eb.1|Spi2A|spi2	serine (or cysteine) peptidase inhibitor, clade A, member 3G	protein-coding
chr12	104471832	104472333	+	781	NA	exon (NM_010351, exon 2 of 3)	exon (NM_010351, exon 2 of 3)	1154	NM_010351	14836	Mm.129	NM_010351	ENSMUSG00000021095	Gsc	-	goosecoid homeobox	protein-coding
chr12	105336064	105337702	+	549	NA	promoter-TSS (NR_125773)	promoter-TSS (NR_125773)	-110	NR_125773	69952	Mm.158311	NR_045047	ENSMUSG00000097929	Tunar	2810011L19Rik|Tuna	Tcl1 upstream neural differentiation associated RNA	ncRNA
chr12	108675537	108676263	+	562	NA	intron (NM_001163396, intron 7 of 14)	intron (NM_001163396, intron 7 of 14)	17280	NR_029771	723909		NR_029771	ENSMUSG00000065436	Mir342	Mirn342|mmu-mir-342	microRNA 342	ncRNA
chr12	109067642	109068203	+	754	NA	intron (NM_001163175, intron 1 of 6)	intron (NM_001163175, intron 1 of 6)	295	NM_001163175	380785	Mm.342085	NM_001163175	ENSMUSG00000040867	Begain	BM948371|Gm897	brain-enriched guanylate kinase-associated	protein-coding
chr12	109958764	109959261	+	685	NA	Intergenic	Intergenic	199061	NR_045466	67280	Mm.390495	NR_045466	ENSMUSG00000113331	3110009F21Rik	-	RIKEN cDNA 3110009F21 gene	ncRNA
chr12	110850122	110850899	+	919	NA	exon (NM_028365, exon 1 of 8)	exon (NM_028365, exon 1 of 8)	231	NM_001199785	72805	Mm.443524	NM_028365	ENSMUSG00000021271	Zfp839	2810455K09Rik	zinc finger protein 839	protein-coding
chr12	111187126	111187333	+	660	NA	intron (NM_001286122, intron 1 of 9)	intron (NM_001286122, intron 1 of 9)	-2738	NR_130987	78062	Mm.427248	NR_130987	ENSMUSG00000083193	4930595D18Rik	-	RIKEN cDNA 4930595D18 gene	ncRNA
chr12	111471076	111471497	+	755	NA	Intergenic	MT2A|LTR|ERVL	14537	NM_001033248	212539	Mm.81916	NM_001033248	ENSMUSG00000010529	Gm266	-	predicted gene 266	protein-coding
chr12	111553150	111553601	+	1000	NA	Intergenic	MTEa|LTR|ERVL-MaLR	12429	NR_033168	100316932	Mm.484709	NR_033168	ENSMUSG00000064493	Snora28	MBI-13	small nucleolar RNA, H/ACA box 28	snoRNA
chr12	111732526	111733413	+	968	NA	intron (NM_001163388, intron 4 of 5)	intron (NM_001163388, intron 4 of 5)	19700	NM_001163388	68020	Mm.425762	NM_026511	ENSMUSG00000037787	Apopt1	1700081D05Rik|2810002N01Rik|Apop-1|Apop1	apoptogenic, mitochondrial 1	protein-coding
chr12	111758294	111759210	+	890	NA	promoter-TSS (NM_001361610)	promoter-TSS (NM_001361610)	-97	NM_001025360	16593	Mm.278357	NM_008450	ENSMUSG00000021288	Klc1	AI874768|Kns2	kinesin light chain 1	protein-coding
chr12	112024106	112025651	+	555	NA	intron (NM_029056, intron 15 of 35)	intron (NM_029056, intron 15 of 35)	-44127	NM_001127685	217874	Mm.134213	NM_001127685	ENSMUSG00000091402	Rd3l	A930011N13	retinal degeneration 3-like	protein-coding
chr12	112062328	112062724	+	627	NA	intron (NM_029056, intron 33 of 35)	intron (NM_029056, intron 33 of 35)	-44157	NM_001081169	104816	Mm.77133	NM_001081169	ENSMUSG00000037686	Aspg	A530050D06Rik|AI429460|Gm690	asparaginase	protein-coding
chr12	112295112	112295906	+	1000	NA	Intergenic	Intergenic	127689	NR_036459	100504733	Mm.255309	NM_176956	ENSMUSG00000047828	A730018C14Rik	-	RIKEN cDNA A730018C14 gene	ncRNA
chr12	112516822	112517384	+	982	NA	Intergenic	RMER15-int|LTR|ERVL	-5943	NM_178915	104885	Mm.37751	NM_178915	ENSMUSG00000054013	Tmem179	AI839735	transmembrane protein 179	protein-coding
chr12	112897674	112898215	+	1000	NA	Intergenic	ORR1F|LTR|ERVL-MaLR	22597	NR_105906	102465567		NR_105906	ENSMUSG00000098338	Mir6941	Gm27923|mmu-mir-6941	microRNA 6941	ncRNA
chr12	11341810	11342523	+	591	NA	intron (NM_012038, intron 2 of 3)	intron (NM_012038, intron 2 of 3)	42279	NR_106136	102465775		NR_106136	ENSMUSG00000098879	Mir7675	Gm27965|mmu-mir-7675	microRNA 7675	ncRNA
chr12	113487634	113488000	+	568	NA	Intergenic	Intergenic	-1748	NM_001009545	238405	Mm.442216	NM_001009545	ENSMUSG00000051804	Adam6b	4930523C11Rik	a disintegrin and metallopeptidase domain 6B	protein-coding
chr12	113716489	113716846	+	854	NA	Intergenic	Intergenic	172759	NM_174885	238406	Mm.188683	NM_174885	ENSMUSG00000043945	Adam6a	Adam6|tMDCIV	a disintegrin and metallopeptidase domain 6A	protein-coding
chr12	115638185	115638966	+	603	NA	Intergenic	RMER13B|LTR|ERVK	57219	NR_105810	102465205		NR_105810	ENSMUSG00000098336	Mir6388	Gm27925|mmu-mir-6388	microRNA 6388	ncRNA
chr12	116404996	116406023	+	1000	NA	promoter-TSS (NR_028421)	promoter-TSS (NR_028421)	73	NM_133762	76044	Mm.491196	NM_133762	ENSMUSG00000042029	Ncapg2	5830426I05Rik|CAP-G2|Luzp5|Mtb|mCAP-G2	non-SMC condensin II complex, subunit G2	protein-coding
chr12	117153737	117154765	+	809	NA	intron (NM_011215, intron 12 of 22)	intron (NM_011215, intron 12 of 22)	-2982	NR_033538	100038689	Mm.445351	NR_033538	ENSMUSG00000099907	Gm10421	-	predicted gene 10421	ncRNA
chr12	118198524	118199089	+	913	NA	exon (NM_010060, exon 1 of 82)	exon (NM_010060, exon 1 of 82)	237	NM_010060	13411	Mm.390540	NM_010060	ENSMUSG00000018581	Dnah11	Dnahc11|avc4|b2b1203Clo|b2b1279Clo|b2b1289Clo|b2b1727Clo|b2b598Clo|iv|lrd	dynein, axonemal, heavy chain 11	protein-coding
chr12	12420863	12421553	+	941	NA	Intergenic	Intergenic	-28733	NR_045829	70858	Mm.410838	NR_045829	ENSMUSG00000114136	4921511I17Rik	-	RIKEN cDNA 4921511I17 gene	ncRNA
chr12	13202304	13202781	+	672	NA	Intergenic	Intergenic	46632	NM_134040	104721	Mm.251255	NM_134040	ENSMUSG00000037149	Ddx1	AA409185|DBP-RB	DEAD (Asp-Glu-Ala-Asp) box polypeptide 1	protein-coding
chr12	13268880	13269489	+	916	NA	promoter-TSS (NM_027706)	promoter-TSS (NM_027706)	57	NM_027706	71169	Mm.177520	NM_027706	ENSMUSG00000020576	Nbas	4933425L03Rik|Nag	neuroblastoma amplified sequence	protein-coding
chr12	13843475	13843915	+	686	NA	Intergenic	Intergenic	-216049	NR_136761	102639399	Mm.122052	NR_136761	ENSMUSG00000113666	Gm35725	-	predicted gene, 35725	ncRNA
chr12	14286734	14287022	+	672	NA	Intergenic	Intergenic	25344	NR_045003	791361	Mm.217963	NR_045003	ENSMUSG00000113336	Gm16497	-	predicted gene 16497	ncRNA
chr12	15816737	15817285	+	813	NA	promoter-TSS (NM_144551)	promoter-TSS (NM_144551)	-226	NM_144551	217410	Mm.491136	NM_144551	ENSMUSG00000020601	Trib2	AW319517|TRB-2|TRB2	tribbles pseudokinase 2	protein-coding
chr12	17085250	17085620	+	557	NA	Intergenic	Intergenic	-73708	NM_001201333	73667	Mm.159048	NM_001201332	ENSMUSG00000071398	2410004P03Rik	-	RIKEN cDNA 2410004P03 gene	protein-coding
chr1	21960716	21962346	+	543	NA	exon (NM_001310477, exon 1 of 13)	exon (NM_001310477, exon 1 of 13)	411	NM_023872	226922	Mm.336519	NM_023872	ENSMUSG00000028033	Kcnq5	7730402H11|9230107O05Rik|AA589396|D1Mgi1	potassium voltage-gated channel, subfamily Q, member 5	protein-coding
chr12	20233070	20234366	+	984	NA	Intergenic	MMERGLN-int|LTR|ERV1	582061	NR_015521	69513	Mm.273972	NR_015521	ENSMUSG00000099759	1700030C10Rik	-	RIKEN cDNA 1700030C10 gene	ncRNA
chr12	24680593	24681940	+	874	NA	5' UTR (NM_138686, exon 1 of 5)	5' UTR (NM_138686, exon 1 of 5)	529	NM_001161807	12879	Mm.52265	NM_138686	ENSMUSG00000062563	Cys1	2900006B19Rik|AV218859|Ccap|ck|cpk	cystin 1	protein-coding
chr12	25169590	25169939	+	725	NA	Intergenic	Intergenic	40590	NR_045844	432641	Mm.112955	NR_045844		Gm17746	-	predicted gene, 17746	ncRNA
chr12	26414511	26415438	+	546	NA	promoter-TSS (NR_105856)	promoter-TSS (NR_105856)	36	NR_105856	102466676		NR_105856	ENSMUSG00000098771	Mir6538	Gm27439|mmu-mir-6538	microRNA 6538	ncRNA
chr12	28589415	28589780	+	752	NA	Intergenic	Intergenic	-7069	NM_053156	94041	Mm.84927	NM_053156	ENSMUSG00000020636	Allc	1700012B22Rik|Alc	allantoicase	protein-coding
chr12	28750154	28750645	+	771	NA	promoter-TSS (NM_001161411)	promoter-TSS (NM_001161411)	-5	NM_001161410	217449	Mm.132006	NM_178811	ENSMUSG00000020628	Trappc12	CGI-87|D930014A20Rik|Ttc15	trafficking protein particle complex 12	protein-coding
chr12	30883803	30885050	+	543	NA	5' UTR (NM_001159743, exon 1 of 5)	5' UTR (NM_001159743, exon 1 of 5)	102	NM_001159743	100294583	Mm.399726	NM_001159743	ENSMUSG00000054204	Alkal2	6230419C23Rik|Fam150b	ALK and LTK ligand 2	protein-coding
chr12	31264798	31265381	+	667	NA	promoter-TSS (NM_008482)	promoter-TSS (NM_008482)	-204	NM_008482	16777	Mm.172674	NM_008482	ENSMUSG00000002900	Lamb1	C77966|C80098|C81607|D130003D08Rik|Lamb-1|Lamb1-1	laminin B1	protein-coding
chr12	31558971	31559872	+	552	NA	5' UTR (NM_011867, exon 2 of 21)	5' UTR (NM_011867, exon 2 of 21)	563	NM_011867	23985	Mm.100187	NM_011867	ENSMUSG00000020651	Slc26a4	Pds|pendrin	solute carrier family 26, member 4	protein-coding
chr12	32897558	32897961	+	598	NA	Intergenic	Intergenic	56030	NR_044986	74076	Mm.50114	NR_044986	ENSMUSG00000097494	4933406C10Rik	-	RIKEN cDNA 4933406C10 gene	ncRNA
chr12	33379774	33380418	+	616	NA	intron (NR_131031, intron 2 of 3)	intron (NR_131031, intron 2 of 3)	14664	NR_131031	75836	Mm.410807	NR_131031	ENSMUSG00000085664	Atxn7l1os2	4930556N08Rik	ataxin 7-like 1, opposite strand 2	ncRNA
chr12	33394900	33395552	+	574	NA	promoter-TSS (NR_131031)	promoter-TSS (NR_131031)	372	NM_029152	75040	Mm.156068	NM_029152	ENSMUSG00000020562	Efcab10	4930504H06Rik	EF-hand calcium binding domain 10	protein-coding
chr12	34906461	34907408	+	1000	NA	intron (NM_001271386, intron 2 of 27)	CpG	10161	NM_001271386	79221	Mm.310551	NM_024124	ENSMUSG00000004698	Hdac9	AV022454|D030072B18Rik|HD7B|HD9|HDRP|Hdac7b|Mitr|mKIAA0744	histone deacetylase 9	protein-coding
chr12	35193295	35193856	+	591	NA	Intergenic	Intergenic	1322	NR_030449	751520		NR_030449	ENSMUSG00000076253	Mir680-3	Mirn680-3	microRNA 680-3	ncRNA
chr12	35672330	35673081	+	559	NA	intron (NR_045050, intron 4 of 4)	MTD|LTR|ERVL-MaLR	13599	NR_045051	71581	Mm.100110	NR_045050	ENSMUSG00000113985	9130015A21Rik	100043575|Gm4527	RIKEN cDNA 9130015A21 gene	ncRNA
chr12	36156318	36158196	+	1000	NA	promoter-TSS (NM_025840)	promoter-TSS (NM_025840)	133	NM_146033	217473	Mm.130422	NM_146033	ENSMUSG00000036188	Ankmy2	AI035571|ZMYND20	ankyrin repeat and MYND domain containing 2	protein-coding
chr12	37108918	37109467	+	660	NA	exon (NM_008584, exon 1 of 3)	exon (NM_008584, exon 1 of 3)	652	NM_008584	17286	Mm.341398	NM_008584	ENSMUSG00000036144	Meox2	AI528662|Gax|Mox-2|Mox2	mesenchyme homeobox 2	protein-coding
chr1	23968256	23969007	+	678	NA	Intergenic	RMER1A|Other|Other	37009	NM_026503	68002	Mm.250424	NM_026503	ENSMUSG00000026154	Sdhaf4	1110058L19Rik|1700001E18Rik|C6orf57	succinate dehydrogenase complex assembly factor 4	protein-coding
chr12	40133741	40134262	+	666	NA	exon (NM_001146196, exon 1 of 16)	exon (NM_001146196, exon 1 of 16)	227	NM_001146196	20259	Mm.2416	NM_009132	ENSMUSG00000002565	Scin	AW545522|adseverin	scinderin	protein-coding
chr12	4132988	4133802	+	560	NA	promoter-TSS (NM_001159536)	promoter-TSS (NM_001159536)	-2	NM_001159536	104111	Mm.489807	NM_138305	ENSMUSG00000020654	Adcy3	AC3|ACIII|mKIAA0511	adenylate cyclase 3	protein-coding
chr1	24587326	24587554	+	655	NA	promoter-TSS (NM_007733)	promoter-TSS (NM_007733)	-3	NM_007733	12823	Mm.329196	NM_007733	ENSMUSG00000026141	Col19a1	-	collagen, type XIX, alpha 1	protein-coding
chr12	4841046	4841820	+	995	NA	exon (NM_016863, exon 1 of 4)	exon (NM_016863, exon 1 of 4)	162	NM_016863	14226	Mm.20453	NM_016863	ENSMUSG00000020635	Fkbp1b	12.6kDa|AW494148|FKBP12.6|calstabin2	FK506 binding protein 1b	protein-coding
chr12	4873943	4874851	+	909	NA	promoter-TSS (NM_001033488)	promoter-TSS (NM_001033488)	-38	NM_001033488	432628	Mm.154078	NM_001033488	ENSMUSG00000037336	Mfsd2b	Gm1964	major facilitator superfamily domain containing 2B	protein-coding
chr12	50038877	50039521	+	1000	NA	Intergenic	RMER6D|LTR|ERVK	-558337	NR_045472	69054	Mm.417838	NR_045472	ENSMUSG00000100844	1810007C17Rik	-	RIKEN cDNA 1810007C17 gene	ncRNA
chr12	50999645	50999938	+	762	NA	Intergenic	Intergenic	-5365	NR_126468	75494	Mm.416848	NR_126468	ENSMUSG00000111986	1700008C04Rik	-	RIKEN cDNA 1700008C04 gene	ncRNA
chr12	51592967	51594069	+	938	NA	5' UTR (NM_007728, exon 1 of 11)	5' UTR (NM_007728, exon 1 of 11)	177	NM_007728	12810	Mm.21325	NM_007728	ENSMUSG00000020953	Coch	AW122937|Coch-5B2|D12H14S564E	cochlin	protein-coding
chr12	52097615	52098008	+	908	NA	promoter-TSS (NM_029760)	promoter-TSS (NM_029760)	65	NM_029760	76826	Mm.244781	NM_029760	ENSMUSG00000035142	Nubpl	2410170E07Rik	nucleotide binding protein-like	protein-coding
chr12	53146460	53147142	+	918	NA	intron (NM_198111, intron 13 of 13)	intron (NM_198111, intron 13 of 13)	-101631	NM_001370963	27386	Mm.247044	NM_013780	ENSMUSG00000021010	Npas3	4930423H22Rik|bHLHe12	neuronal PAS domain protein 3	protein-coding
chr12	54611214	54612102	+	833	NA	Intergenic	RMER1A|Other|Other	34354	NR_035439	100316682		NR_035439	ENSMUSG00000106344	Mir1892	Mirn1892|mir-1892|mmu-mir-1892	microRNA 1892	ncRNA
chr12	55079824	55080909	+	1000	NA	promoter-TSS (NM_011899)	promoter-TSS (NM_011899)	-130	NM_011899	24067	Mm.471968	NM_011899	ENSMUSG00000073079	Srp54a	54kDa|Srp54	signal recognition particle 54A	protein-coding
chr12	55302424	55303051	+	1000	NA	promoter-TSS (NM_025373)	promoter-TSS (NM_025373)	100	NM_025373	66132	Mm.383213	NM_025373	ENSMUSG00000021023	Prorp	1110008L16Rik|Kiaa0391|Mrpp3|mKIAA0391	protein only RNase P catalytic subunit	protein-coding
chr12	55598829	55600768	+	850	NA	exon (NM_020287, exon 1 of 1)	exon (NM_020287, exon 1 of 1)	881	NM_020287	56856	Mm.114886	NM_020287	ENSMUSG00000045440	Insm2	Mlt1	insulinoma-associated 2	protein-coding
chr12	57201494	57201893	+	1000	NA	Intergenic	Lx2B2|LINE|L1	-4221	NM_172577	217593	Mm.32835	NM_172577	ENSMUSG00000035472	Slc25a21	9930033G19Rik|A630030I10|BB158148	solute carrier family 25 (mitochondrial oxodicarboxylate carrier), member 21	protein-coding
chr12	58219185	58219396	+	943	NA	Intergenic	Intergenic	7486	NM_009216	20605	Mm.278336	NM_009216	ENSMUSG00000035431	Sstr1	SRIF-2|SS-1-R|SS1-R|SS1R|Smstr-1|Smstr1|sst1	somatostatin receptor 1	protein-coding
chr12	70291994	70292521	+	984	NA	intron (NM_001110203, intron 2 of 8)	intron (NM_001110203, intron 2 of 8)	-16248	NR_037248	100526482		NR_037248	ENSMUSG00000078026	Mir466o	Mir4660|mmu-mir-466o	microRNA 466o	ncRNA
chr12	70910055	70910453	+	842	NA	Intergenic	Intergenic	-27603	NM_019785	56444	Mm.29317	NM_019785	ENSMUSG00000021076	Actr10	Actr11|Arp11	ARP10 actin-related protein 10	protein-coding
chr12	71136183	71136756	+	869	NA	promoter-TSS (NM_001163378)	promoter-TSS (NM_001163378)	206	NM_001024853	30056	Mm.207767	NM_013896	ENSMUSG00000021079	Timm9	2810011L15Rik|Tim10a|Timm10	translocase of inner mitochondrial membrane 9	protein-coding
chr12	71417039	71417437	+	671	NA	Intergenic	Intergenic	-33030	NR_136902	67348	Mm.54261	NR_136902	ENSMUSG00000100668	1700083H02Rik	100041190|Gm3190	RIKEN cDNA 1700083H02 gene	ncRNA
chr12	72085018	72086385	+	1000	NA	promoter-TSS (NM_024205)	promoter-TSS (NM_024205)	-138	NM_001205067	104771	Mm.258935	NM_024205	ENSMUSG00000005078	Jkamp	1200003C05Rik|2310047L11Rik|Jamp	JNK1/MAPK8-associated membrane protein	protein-coding
chr12	72939656	72940714	+	742	NA	exon (NM_011384, exon 1 of 2)	exon (NM_011384, exon 1 of 2)	303	NM_011384	20476	Mm.57138	NM_011384	ENSMUSG00000021099	Six6	Optx2|Six9	sine oculis-related homeobox 6	protein-coding
chr12	73147300	73147584	+	593	NA	intron (NM_008612, intron 1 of 7)	intron (NM_008612, intron 1 of 7)	23725	NM_008612	17420	Mm.246750	NM_008612	ENSMUSG00000021103	Mnat1	E130115E11Rik|MAT1|P36	menage a trois 1	protein-coding
chr12	73545522	73546836	+	622	NA	exon (NM_178715, exon 1 of 1)	exon (NM_178715, exon 1 of 1)	216	NM_178715	238257	Mm.251196	NM_178715	ENSMUSG00000034435	Tmem30b	9130011B11Rik	transmembrane protein 30B	protein-coding
chr12	74283955	74284538	+	683	NA	promoter-TSS (NR_030735)	promoter-TSS (NR_030735)	-30	NR_030733	74284	Mm.287421	NR_030733	ENSMUSG00000071265	1700086L19Rik	1700006L05Rik|AU016007	RIKEN cDNA 1700086L19 gene	ncRNA
chr12	75176209	75177626	+	735	NA	5' UTR (NM_172805, exon 1 of 11)	5' UTR (NM_172805, exon 1 of 11)	415	NM_172805	238271	Mm.44465	NM_172805	ENSMUSG00000034402	Kcnh5	Eag2	potassium voltage-gated channel, subfamily H (eag-related), member 5	protein-coding
chr12	76765400	76765964	+	928	NA	intron (NR_154884, intron 1 of 2)	CpG	144	NM_206534	211151	Mm.80970	NM_206534	ENSMUSG00000090258	Churc1	1700030P15Rik|My015|chch	churchill domain containing 1	protein-coding
chr12	76818128	76818491	+	1000	NA	promoter-TSS (NM_001347406)	promoter-TSS (NM_001347406)	65	NM_001347406	104886	Mm.172847	NM_134050	ENSMUSG00000021062	Rab15	2310012G06Rik|AI840042	RAB15, member RAS oncogene family	protein-coding
chr12	78860899	78862428	+	1000	NA	promoter-TSS (NM_023721)	promoter-TSS (NM_023721)	-25	NM_023721	73834	Mm.311549	NM_023721	ENSMUSG00000021114	Atp6v1d	1110004P10Rik|Atp6m|VATD|Vma8	ATPase, H+ transporting, lysosomal V1 subunit D	protein-coding
chr12	79006486	79007505	+	744	NA	5' UTR (NM_178745, exon 1 of 3)	5' UTR (NM_178745, exon 1 of 3)	282	NM_178745	268567	Mm.341747	NM_178745	ENSMUSG00000046157	Tmem229b	6330442E10Rik|9830138K24|AU019070	transmembrane protein 229B	protein-coding
chr12	79296098	79296567	+	1000	NA	promoter-TSS (NM_009014)	promoter-TSS (NM_009014)	-50	NM_001008550	211978	Mm.297919	NM_001008550	ENSMUSG00000066440	Zfyve26	4930465A13|9330197E15Rik|A630028O16Rik|Gm893|mKIAA0321	zinc finger, FYVE domain containing 26	protein-coding
chr12	79352164	79352688	+	548	NA	intron (NM_009014, intron 7 of 10)	intron (NM_009014, intron 7 of 10)	55075	NM_001252562	19363	Mm.341756	NM_009014	ENSMUSG00000059060	Rad51b	AI553500|R51H2|Rad51l1|mREC2	RAD51 paralog B	protein-coding
chr12	80112844	80113448	+	580	NA	promoter-TSS (NM_007564)	promoter-TSS (NM_007564)	-133	NM_007564	12192	Mm.235132	NM_007564	ENSMUSG00000021127	Zfp36l1	AW742437|AW743212|Berg36|Brf1|D530020L18Rik|ERF1|TIS11b|cMG1	zinc finger protein 36, C3H type-like 1	protein-coding
chr12	80344607	80345226	+	748	NA	intron (NM_001364324, intron 8 of 8)	intron (NM_001364324, intron 8 of 8)	46761	NR_037207	100526530		NR_037207	ENSMUSG00000105972	Mir1843a	Mir1843|mir-1843a|mmu-mir-1843|mmu-mir-1843a	microRNA 1843a	ncRNA
chr12	8070492	8071090	+	1000	NA	Intergenic	Intergenic	93114	NM_009693	238055	Mm.221239	NM_009693	ENSMUSG00000020609	Apob	AI315052|Apo B-100|apob-100|apob-48	apolipoprotein B	protein-coding
chr12	80937665	80938002	+	827	NA	Intergenic	Intergenic	7566	NR_045057	100504661	Mm.442322	NR_045057	ENSMUSG00000112880	Gm20337	-	predicted gene, 20337	ncRNA
chr12	81026722	81027273	+	892	NA	5' UTR (NM_022316, exon 1 of 13)	5' UTR (NM_022316, exon 1 of 13)	189	NM_001146217	64075	Mm.273295	NM_022316	ENSMUSG00000021136	Smoc1	2600002F22Rik|AI848508|SRG	SPARC related modular calcium binding 1	protein-coding
chr12	81532439	81533022	+	889	NA	exon (NM_001309848, exon 1 of 6)	exon (NM_001309848, exon 1 of 6)	181	NR_132136	24071	Mm.279603	NM_025292	ENSMUSG00000090935	Synj2bp	AA409442|ARIP2|ActRIP4|D12Wsu118e|OMP25	synaptojanin 2 binding protein	protein-coding
chr12	84361572	84362464	+	1000	NA	promoter-TSS (NM_172581)	promoter-TSS (NM_172581)	50	NM_172582	217707	Mm.280062	NM_172582	ENSMUSG00000021235	Coq6	5930427M12Rik|AW742344	coenzyme Q6 monooxygenase	protein-coding
chr12	84617226	84617621	+	1000	NA	promoter-TSS (NM_008992)	promoter-TSS (NM_008992)	43	NM_008992	19300	Mm.229109	NM_008992	ENSMUSG00000021240	Abcd4	P69r|P70R|Pxmp1l	ATP-binding cassette, sub-family D (ALD), member 4	protein-coding
chr12	84698250	84699023	+	622	NA	5' UTR (NM_001033334, exon 1 of 4)	5' UTR (NM_001033334, exon 1 of 4)	171	NM_001033334	627191	Mm.152484	NM_001033334	ENSMUSG00000071234	Syndig1l	DSPC1|Gm261|SynDIG2|Tmem90a	synapse differentiation inducing 1 like	protein-coding
chr12	84772800	84773449	+	1000	NA	promoter-TSS (NM_028863)	promoter-TSS (NM_028863)	-12	NM_023409	67963	Mm.282556	NM_023409	ENSMUSG00000021242	Npc2	2700012J19Rik|AA408070|AU045843|HE1	NPC intracellular cholesterol transporter 2	protein-coding
chr12	85175450	85176481	+	565	NA	promoter-TSS (NM_001271705)	promoter-TSS (NM_001271705)	17	NM_001271705	18654	Mm.4809	NM_008827	ENSMUSG00000004791	Pgf	AI854365|PIGF|Plgf	placental growth factor	protein-coding
chr12	85288345	85289432	+	1000	NA	promoter-TSS (NM_001364360)	promoter-TSS (NM_001364360)	297	NM_172414	72350	Mm.158810	NM_172414	ENSMUSG00000045064	Zc2hc1c	2810002I04Rik|AV046379|Fam164c	zinc finger, C2HC-type containing 1C	protein-coding
chr12	86142277	86142741	+	562	NA	intron (NM_029601, intron 4 of 7)	intron (NM_029601, intron 4 of 7)	-26832	NR_046081	328136	Mm.312050	NR_046081	ENSMUSG00000097543	Gm805	-	predicted gene 805	ncRNA
chr12	87299200	87300836	+	887	NA	promoter-TSS (NM_001290302)	promoter-TSS (NM_001290302)	-313	NM_001290302	217738	Mm.219363	NM_001290302	ENSMUSG00000050671	Ism2	Gm264|Thsd3	isthmin 2	protein-coding
chr12	87434701	87435321	+	592	NA	intron (NM_001102565, intron 3 of 5)	intron (NM_001102565, intron 3 of 5)	2746	NR_037228	100526546		NR_037228	ENSMUSG00000105428	Mir3068	mir-3068|mmu-mir-3068	microRNA 3068	ncRNA
chr12	87443428	87444009	+	767	NA	promoter-TSS (NM_026958)	promoter-TSS (NM_026958)	121	NM_001102565	211064	Mm.486235	NM_001102565	ENSMUSG00000079036	Alkbh1	2700073G19Rik|Abh|Alkbh|alkB|hABH	alkB homolog 1, histone H2A dioxygenase	protein-coding
chr12	87781324	87782461	+	668	NA	Intergenic	Intergenic	-6137	NM_001270722	100861908	Mm.464911	NM_001270722	ENSMUSG00000095724	Gm21319	-	predicted gene, 21319	protein-coding
chr12	87870151	87870408	+	908	NA	Intergenic	Intergenic	-3793	NM_001122662	100039042	Mm.423010	NM_001122662	ENSMUSG00000072905	Gm2016	-	predicted gene 2016	protein-coding
chr12	88278155	88278415	+	795	NA	Intergenic	Intergenic	-3788	NM_001013824	435337	Mm.441366	NM_001013824	ENSMUSG00000079029	Gm5662	EG435337	predicted gene 5662	protein-coding
chr12	88901644	88902026	+	600	NA	intron (NM_001198587, intron 3 of 19)	intron (NM_001198587, intron 3 of 19)	-51555	NM_172544	18191	Mm.425766	NM_172544	ENSMUSG00000066392	Nrxn3	-	neurexin III	protein-coding
chr12	90987904	90988152	+	745	NA	Intergenic	Intergenic	-57820	NR_045858	71349	Mm.442093	NR_045858	ENSMUSG00000085004	5430427M07Rik	-	RIKEN cDNA 5430427M07 gene	ncRNA
chr12	91400266	91401281	+	1000	NA	promoter-TSS (NM_011648)	promoter-TSS (NM_011648)	-220	NM_011648	22095	Mm.173847	NM_011648	ENSMUSG00000020963	Tshr	AI481368|hypothroid|hyt|pet	thyroid stimulating hormone receptor	protein-coding
chr12	99965540	99966350	+	634	NA	5' UTR (NM_146037, exon 2 of 3)	5' UTR (NM_146037, exon 2 of 3)	1446	NM_146037	217826	Mm.312335	NM_146037	ENSMUSG00000045404	Kcnk13	BB085247|F730021E22Rik|Gm1570|Gm1685	potassium channel, subfamily K, member 13	protein-coding
chr13	102594131	102594819	+	977	NA	Intergenic	B4A|SINE|B4	-99072	NM_001360519	17079	Mm.373974	NM_008533	ENSMUSG00000021624	Cd180	F630107B15|Ly-78|Ly78|RP105	CD180 antigen	protein-coding
chr13	104109267	104110081	+	1000	NA	promoter-TSS (NM_029447)	promoter-TSS (NM_029447)	-60	NM_029447	75805	Mm.127692	NM_029447	ENSMUSG00000021710	Nln	4930472G13Rik|C79345	neurolysin (metallopeptidase M3 family)	protein-coding
chr13	104460355	104460617	+	1000	NA	intron (NR_136938, intron 22 of 26)	intron (NR_136938, intron 22 of 26)	172651	NR_136938	108154	Mm.208125	NM_175496	ENSMUSG00000046169	Adamts6	A930019D11Rik|ADAM-TS6|b2b1879.1Clo|b2b2029Clo|b2b2182Clo|b2b2187.1Clo|b2b2228Clo	a disintegrin-like and metallopeptidase (reprolysin type) with thrombospondin type 1 motif, 6	protein-coding
chr13	104816515	104817387	+	769	NA	promoter-TSS (NM_026072)	promoter-TSS (NM_026072)	2	NM_026072	67285	Mm.235398	NM_026072	ENSMUSG00000021715	Cwc27	3110009E13Rik|NY-CO-10|Sdccag10	CWC27 spliceosome-associated protein	protein-coding
chr13	108316036	108316980	+	1000	NA	intron (NM_178683, intron 1 of 10)	CpG	171	NM_178683	218581	Mm.32318	NM_178683	ENSMUSG00000021697	Depdc1b	9830132O03|AW260467|XTP1	DEP domain containing 1B	protein-coding
chr13	110882717	110883277	+	794	NA	non-coding (NR_131194, exon 3 of 3)	non-coding (NR_131194, exon 3 of 3)	-20502	NR_131193	75139	Mm.490931	NR_131193	ENSMUSG00000114472	Gm38397	-	predicted gene, 38397	ncRNA
chr13	110907685	110908140	+	851	NA	non-coding (NR_131193, exon 5 of 5)	non-coding (NR_131193, exon 5 of 5)	-4066	NR_131194	102636142	Mm.417611	NR_131194		4930526H09Rik	-	RIKEN cDNA 4930526H09 gene	ncRNA
chr13	112054802	112055150	+	992	NA	Intergenic	Intergenic	187040	NR_130345	102636620	Mm.402328	NR_130345	ENSMUSG00000086111	Gm15326	-	predicted gene 15326	ncRNA
chr13	112318224	112318537	+	690	NA	intron (NM_001168403, intron 2 of 11)	intron (NM_001168403, intron 2 of 11)	29862	NM_001168404	77318	Mm.159895	NM_029898	ENSMUSG00000049985	Ankrd55	C030011J08Rik	ankyrin repeat domain 55	protein-coding
chr13	113354076	113354353	+	592	NA	Intergenic	Intergenic	144555	NM_023612	71690	Mm.38929	NM_023612	ENSMUSG00000042379	Esm1	0610042H23Rik|AV004503|ESM-1	endothelial cell-specific molecule 1	protein-coding
chr13	114458301	114459565	+	604	NA	promoter-TSS (NM_001301375)	promoter-TSS (NM_001301375)	18	NM_001301375	14313	Mm.4913	NM_008046	ENSMUSG00000021765	Fst	AL033346|FS	follistatin	protein-coding
chr13	114638809	114639359	+	928	NA	intron (NR_045976, intron 3 of 6)	intron (NR_045976, intron 3 of 6)	31856	NR_045976	75161	Mm.50406	NM_175218	ENSMUSG00000051758	4930544M13Rik	-	RIKEN cDNA 4930544M13 gene	ncRNA
chr13	117143768	117144229	+	825	NA	Intergenic	Intergenic	13973	NR_046023	623312	Mm.131279	NR_046023	ENSMUSG00000114792	Gm6416	-	predicted gene 6416	ncRNA
chr13	117602194	117602827	+	812	NA	5' UTR (NM_010408, exon 1 of 8)	5' UTR (NM_010408, exon 1 of 8)	190	NM_010408	15165	Mm.343429	NM_010408	ENSMUSG00000021730	Hcn1	Bcng1|C630013B14Rik|HAC2	hyperpolarization activated cyclic nucleotide gated potassium channel 1	protein-coding
chr13	120014971	120015804	+	611	NA	Intergenic	Intergenic	36817	NM_001302966	100861753	Mm.165042	NM_001302966	ENSMUSG00000095609	Gm21188	-	predicted gene, 21188	protein-coding
chr13	12461010	12461837	+	1000	NA	5' UTR (NM_001199043, exon 1 of 10)	5' UTR (NM_001199043, exon 1 of 10)	315	NM_018886	56048	Mm.474138	NM_018886	ENSMUSG00000057554	Lgals8	1200015E08Rik|AI326142|D13Ertd524e|Lgals-8	lectin, galactose binding, soluble 8	protein-coding
chr13	12565545	12566487	+	683	NA	5' UTR (NM_026184, exon 1 of 16)	5' UTR (NM_026184, exon 1 of 16)	133	NM_026184	67475	Mm.358706	NM_026184	ENSMUSG00000057069	Ero1lb	1300013B24Rik|1700065B09Rik|AI447560|Ero1b|ero1-beta	ERO1-like beta (S. cerevisiae)	protein-coding
chr13	12635303	12635524	+	655	NA	intron (NR_003568, intron 1 of 6)	intron (NR_003568, intron 1 of 6)	14982	NR_003568	664862	Mm.415635	NR_003568		Gpr137b-ps	2310041G17Rik	G protein-coupled receptor 137B, pseudogene	pseudo
chr13	12818644	12819038	+	959	NA	Intergenic	Intergenic	-18762	NM_011118	18812	Mm.457984	NM_011118	ENSMUSG00000056457	Prl2c3	Ghd1|MRP-2|MRP-3|Mrpplf3|PLF-2|PLF-3|Plf2|Prl2c4|mrp/plf3	prolactin family 2, subfamily c, member 3	protein-coding
chr13	13163058	13163421	+	785	NA	Intergenic	Intergenic	-19477	NM_181852	107849	Mm.392548	NM_181852	ENSMUSG00000055360	Prl2c5	Ghd3|MRP-4|Mrpplf4|PLF-4	prolactin family 2, subfamily c, member 5	protein-coding
chr13	14062987	14064794	+	1000	NA	promoter-TSS (NM_010282)	promoter-TSS (NM_010282)	106	NM_194262	94246	Mm.439784	NM_194262	ENSMUSG00000039219	Arid4b	BCAA|BRCAA1|RBBP1L1|Rbp1l1|SAP180	AT rich interactive domain 4B (RBP1-like)	protein-coding
chr13	15463014	15464462	+	582	NA	promoter-TSS (NM_008130)	promoter-TSS (NM_008130)	15	NM_008130	14634	Mm.5098	NM_008130	ENSMUSG00000021318	Gli3	AI854843|AU023367|Bph|GLI3-190|GLI3FL|Pdn|Xt|add	GLI-Kruppel family member GLI3	protein-coding
chr13	16012254	16012746	+	762	NA	intron (NM_008380, intron 2 of 4)	intron (NM_008380, intron 2 of 4)	649	NM_008380	16323	Mm.8042	NM_008380	ENSMUSG00000041324	Inhba	-	inhibin beta-A	protein-coding
chr13	16738357	16738661	+	631	NA	Intergenic	Intergenic	-715086	NR_155430	100503142	Mm.359204	NR_155430		B230303A05Rik	B230303A05|EG328191	U1 small nuclear ribonucleoprotein 1C pseudogene	pseudo
chr1	32104146	32104505	+	684	NA	Intergenic	MTD|LTR|ERVL-MaLR	-68397	NM_133235	170771	Mm.336594	NM_133235	ENSMUSG00000026058	Khdrbs2	6330586C16Rik|Slim1|Slm-1|Slm1|TG-RP135|Tg(LRRK2*R1441G)135Cjli|mSLM-1	KH domain containing, RNA binding, signal transduction associated 2	protein-coding
chr13	21417433	21417970	+	1000	NA	Intergenic	Intergenic	-14946	NM_001145778	72739	Mm.296071	NM_023685	ENSMUSG00000021327	Zkscan3	2810435N07Rik|AA408594|AI132359|Skz1|Zf47|Zfp-47|Zfp306|Zfp307|mszf35	zinc finger with KRAB and SCAN domains 3	protein-coding
chr13	21468266	21468690	+	580	NA	promoter-TSS (NM_025719)	promoter-TSS (NM_025719)	23	NM_025719	66707	Mm.116869	NM_025719	ENSMUSG00000059395	Nkapl	4921504I05Rik	NFKB activating protein-like	protein-coding
chr13	21833472	21833833	+	655	NA	promoter-TSS (NM_001097979)	promoter-TSS (NM_001097979)	-77	NM_001177544	665433	Mm.250564	NM_001177544	ENSMUSG00000094248	Hist1h2ao	Hist1h2ap	histone cluster 1, H2ao	protein-coding
chr13	22035582	22035916	+	752	NA	promoter-TSS (NM_175665)	promoter-TSS (NM_175665)	-72	NM_175665	319184	Mm.358955	NM_175665	ENSMUSG00000062727	Hist1h2bk	-	histone cluster 1, H2bk	protein-coding
chr13	23368880	23369412	+	750	NA	promoter-TSS (NM_001286155)	promoter-TSS (NM_001286155)	62	NM_001286156	218100	Mm.286454	NM_172586	ENSMUSG00000046351	Zfp322a	Znf322|Znf322a	zinc finger protein 322A	protein-coding
chr13	23535168	23535420	+	755	NA	promoter-TSS (NM_145073)	promoter-TSS (NM_145073)	-124	NM_145073	97908	Mm.261657	NM_145073	ENSMUSG00000099517	Hist1h3g	H3.1-221|M32460	histone cluster 1, H3g	protein-coding
chr13	23622236	23622678	+	609	NA	exon (NM_015787, exon 1 of 1)	exon (NM_015787, exon 1 of 1)	101	NM_015787	50709	Mm.170587	NM_015787	ENSMUSG00000051627	Hist1h1e	H1-4|H1.4|H1e|H1f4|H1s-4|H1var2	histone cluster 1, H1e	protein-coding
chr13	23738673	23739966	+	743	NA	exon (NM_015786, exon 1 of 1)	exon (NM_015786, exon 1 of 1)	512	NM_015786	50708	Mm.193539	NM_015786	ENSMUSG00000036181	Hist1h1c	0610008C09Rik|H1.2|H1c|H1f2|H1var1|His1a	histone cluster 1, H1c	protein-coding
chr13	24801081	24801867	+	671	NA	promoter-TSS (NM_024473)	promoter-TSS (NM_024473)	-183	NM_024473	79555	Mm.266668	NM_024473	ENSMUSG00000019132	BC005537	8030460C05Rik|C78201	cDNA sequence BC005537	protein-coding
chr13	24831380	24832059	+	1000	NA	promoter-TSS (NM_019551)	promoter-TSS (NM_019551)	60	NM_019551	56196	Mm.427162	NM_019551	ENSMUSG00000035958	Tdp2	D13Ertd656e|Ttrap	tyrosyl-DNA phosphodiesterase 2	protein-coding
chr13	28132777	28133134	+	912	NA	Intergenic	L1VL2|LINE|L1	-9529	NM_023746	28078	Mm.155058	NM_023746	ENSMUSG00000017064	Prl5a1	1600013P04Rik|D13Wsu14e|Ghd24|PLP-L|Prlpl	prolactin family 5, subfamily a, member 1	protein-coding
chr13	30136295	30136778	+	879	NA	promoter-TSS (NM_153546)	promoter-TSS (NM_153546)	46	NM_153546	218121	Mm.89682	NM_153546	ENSMUSG00000038732	Mboat1	9130215M02Rik|BC023845|LPEAT1|Moact1|Oact1	membrane bound O-acyltransferase domain containing 1	protein-coding
chr13	34002222	34002888	+	1000	NA	promoter-TSS (NM_009068)	promoter-TSS (NM_009068)	192	NM_001359997	19766	Mm.374799	NM_009068	ENSMUSG00000021408	Ripk1	D330015H01Rik|RIP|RIP-1|Rinp|Rip1	receptor (TNFRSF)-interacting serine-threonine kinase 1	protein-coding
chr13	34077730	34078210	+	591	NA	promoter-TSS (NM_009450)	promoter-TSS (NM_009450)	38	NM_009450	22151	Mm.422827	NM_009450	ENSMUSG00000058672	Tubb2a	M(beta)2|Tubb2	tubulin, beta 2A class IIA	protein-coding
chr13	34162730	34163618	+	676	NA	exon (NM_001110515, exon 1 of 2)	exon (NM_001110515, exon 1 of 2)	210	NM_001101430	69666	Mm.24788	NM_001101430	ENSMUSG00000071451	Psmg4	PAC-4|mPAC4	proteasome (prosome, macropain) assembly chaperone 4	protein-coding
chr13	34683206	34683797	+	677	NA	Intergenic	RMER15|LTR|ERVL	30578	NR_105041	101056149	Mm.421309	NR_105041	ENSMUSG00000086786	Gm15908	-	predicted gene 15908	ncRNA
chr13	35740594	35742119	+	1000	NA	promoter-TSS (NM_001123386)	promoter-TSS (NM_001123386)	-46	NM_001123386	12593	Mm.29002	NM_009881	ENSMUSG00000059288	Cdyl	AI325931	chromodomain protein, Y chromosome-like	protein-coding
chr13	36117278	36117937	+	1000	NA	promoter-TSS (NM_024274)	promoter-TSS (NM_024274)	-36	NM_024274	69955	Mm.70690	NM_024274	ENSMUSG00000021420	Fars2	Fars1|pheRS	phenylalanine-tRNA synthetase 2 (mitochondrial)	protein-coding
chr13	3633891	3634305	+	601	NA	promoter-TSS (NM_001267724)	promoter-TSS (NM_001267724)	66	NM_001267724	142688	Mm.253061	NM_178283	ENSMUSG00000033781	Asb13	2210015B19Rik|6430573K02Rik|Asb-13|C85285	ankyrin repeat and SOCS box-containing 13	protein-coding
chr13	37783539	37784624	+	744	NA	Intergenic	Intergenic	-41957	NM_026830	68750	Mm.491109	NM_026830	ENSMUSG00000039087	Rreb1	1110037N09Rik|AA414966|B930013M22Rik	ras responsive element binding protein 1	protein-coding
chr13	38123638	38124056	+	1000	NA	Intergenic	Intergenic	-27447	NM_023842	109620	Mm.355327	NM_023842	ENSMUSG00000054889	Dsp	2300002E22Rik|5730453H04Rik|AA407887|AA407888|AW109828|DP|rul	desmoplakin	protein-coding
chr13	38527929	38528953	+	766	NA	promoter-TSS (NM_001289599)	promoter-TSS (NM_001289599)	43	NM_145367	105245	Mm.28622	NM_145367	ENSMUSG00000038991	Txndc5	AL022641|ERp46|PC-TRP	thioredoxin domain containing 5	protein-coding
chr13	38634781	38635243	+	691	NA	promoter-TSS (NM_139063)	promoter-TSS (NM_139063)	80	NM_139063	17828	Mm.261554	NM_139063	ENSMUSG00000038982	Bloc1s5	1810074A19Rik|Muted|mu	biogenesis of lysosomal organelles complex-1, subunit 5, muted	protein-coding
chr13	38658459	38659261	+	1000	NA	intron (NM_025380, intron 1 of 3)	CpG	168	NM_025380	66143	Mm.490319	NM_025380	ENSMUSG00000001707	Eef1e1	1110003A02Rik	eukaryotic translation elongation factor 1 epsilon 1	protein-coding
chr13	38960397	38960829	+	758	NA	promoter-TSS (NR_131019)	promoter-TSS (NR_131019)	-6	NR_131019	75958	Mm.399749	NR_131019	ENSMUSG00000096932	5033403F01Rik	-	RIKEN cDNA 5033403F01 gene	ncRNA
chr13	41000882	41001365	+	671	NA	promoter-TSS (NR_155347)	promoter-TSS (NR_155347)	23	NR_155347	102633880	Mm.314757	NR_155347		A730081D07Rik	-	RIKEN cDNA A730081D07 gene	ncRNA
chr13	41219970	41220784	+	708	NA	promoter-TSS (NM_019423)	promoter-TSS (NM_019423)	26	NM_019423	54326	Mm.2567	NM_019423	ENSMUSG00000021364	Elovl2	AI317360|Ssc2	elongation of very long chain fatty acids (FEN1/Elo2, SUR4/Elo3, yeast)-like 2	protein-coding
chr13	41249565	41250327	+	1000	NA	5' UTR (NM_001135577, exon 1 of 2)	5' UTR (NM_001135577, exon 1 of 2)	102	NM_001135577	108934	Mm.38578	NM_001135577	ENSMUSG00000091264	Smim13	2900036K02Rik	small integral membrane protein 13	protein-coding
chr13	41358662	41359204	+	1000	NA	promoter-TSS (NM_017464)	promoter-TSS (NM_017464)	68	NM_017464	18003	Mm.288980	NM_017464	ENSMUSG00000021365	Nedd9	Cas-L|CasL|HEF1|MEF1|Nedd-9|p105	neural precursor cell expressed, developmentally down-regulated gene 9	protein-coding
chr13	43398253	43398834	+	875	NA	exon (NM_023554, exon 1 of 8)	exon (NM_023554, exon 1 of 8)	167	NM_023554	70078	Mm.439927	NM_023554	ENSMUSG00000063200	Nol7	2210008F15Rik|5730556I21Rik|NOP27|RARG-1	nucleolar protein 7	protein-coding
chr13	46418764	46419166	+	729	NA	5' UTR (NM_001081425, exon 1 of 4)	5' UTR (NM_001081425, exon 1 of 4)	665	NM_001081425	666794	Mm.38269	NM_001081425	ENSMUSG00000038132	Rbm24	6330546B05Rik|AI606861	RNA binding motif protein 24	protein-coding
chr13	47013962	47015003	+	598	NA	exon (NM_175340, exon 1 of 1)	exon (NM_175340, exon 1 of 1)	368	NM_175340	105193	Mm.25593	NM_175340	ENSMUSG00000044231	Nhlrc1	AI505271|B230309E09Rik|EPM2B	NHL repeat containing 1	protein-coding
chr1	34849841	34850495	+	803	NA	intron (NM_175421, intron 1 of 6)	CpG	179	NM_001357425	226971	Mm.292751	NM_145516	ENSMUSG00000026123	Plekhb2	2310009M15Rik|AU018239|Evt2|Phdc|evt-2	pleckstrin homology domain containing, family B (evectins) member 2	protein-coding
chr13	50417735	50418148	+	694	NA	promoter-TSS (NR_154272)	promoter-TSS (NR_154272)	77	NM_175401	109082	Mm.18638	NM_175401	ENSMUSG00000037816	Fbxw17	1110064L07Rik|C85886	F-box and WD-40 domain protein 17	protein-coding
chr13	51100253	51101446	+	736	NA	promoter-TSS (NM_146043)	promoter-TSS (NM_146043)	-31	NM_001283028	20729	Mm.188432	NM_011462	ENSMUSG00000021395	Spin1	Spin	spindlin 1	protein-coding
chr13	51170666	51171629	+	662	NA	5' UTR (NM_029173, exon 1 of 2)	5' UTR (NM_029173, exon 1 of 2)	122	NM_029173	75124	Mm.179243	NM_029173	ENSMUSG00000021396	Nxnl2	4930519N16Rik|Rdcvf2	nucleoredoxin-like 2	protein-coding
chr13	52659260	52659780	+	985	NA	Intergenic	Intergenic	62638	NM_011518	20963	Mm.375031	NM_011518	ENSMUSG00000021457	Syk	Sykb	spleen tyrosine kinase	protein-coding
chr13	54565122	54565554	+	875	NA	promoter-TSS (NM_001252647)	promoter-TSS (NM_001252647)	44	NM_001252645	97820	Mm.24593	NM_133797	ENSMUSG00000025871	4833439L19Rik	4930558H15Rik|C81457|Kiaa1191|P33monox	RIKEN cDNA 4833439L19 gene	protein-coding
chr13	54578546	54579053	+	590	NA	TTS (NR_162773)	TTS (NR_162773)	660	NR_162773	114483555		NR_162773		Mir1271	mmu-mir-1271	microRNA mir-1271	ncRNA
chr13	54589961	54590735	+	1000	NA	promoter-TSS (NM_178605)	promoter-TSS (NM_178605)	117	NM_025933	67044	Mm.29353	NM_025933	ENSMUSG00000025868	Higd2a	2010110M21Rik|AA690237	HIG1 domain family, member 2A	protein-coding
chr13	55329366	55330475	+	894	NA	promoter-TSS (NM_016662)	promoter-TSS (NM_016662)	-189	NM_016662	17121	Mm.20350	NM_016662	ENSMUSG00000021485	Mxd3	4631412E13Rik|Mad3|bHLHc13	Max dimerization protein 3	protein-coding
chr13	55464084	55464999	+	581	NA	intron (NM_001030296, intron 1 of 2)	CpG	274	NM_001030296	432763	Mm.315457	NM_001030296	ENSMUSG00000034686	Prr7	XM_484263	proline rich 7 (synaptic)	protein-coding
chr13	55536435	55536844	+	1000	NA	promoter-TSS (NM_134059)	promoter-TSS (NM_134059)	19	NM_134059	72935	Mm.205045	NM_134059	ENSMUSG00000021494	Ddx41	2900024F02Rik|AA958953|ABS|AI324246	DEAD (Asp-Glu-Ala-Asp) box polypeptide 41	protein-coding
chr13	55622857	55623198	+	760	NA	promoter-TSS (NM_007596)	promoter-TSS (NM_007596)	22	NM_007596	12328	Mm.2313	NM_007596	ENSMUSG00000021501	Caml	AI385748|Camlg	calcium modulating ligand	protein-coding
chr13	56601185	56601574	+	878	NA	Intergenic	Intergenic	-8207	NM_009369	21810	Mm.14455	NM_009369	ENSMUSG00000035493	Tgfbi	68kDa|AI181842|AI747162|Beta-ig|big-h3	transforming growth factor, beta induced	protein-coding
chr13	58158636	58158929	+	692	NA	intron (NM_198004, intron 1 of 4)	B3|SINE|B2	1133	NM_198004	75731	Mm.293919	NM_198004	ENSMUSG00000050002	Idnk	5133401N09Rik	idnK gluconokinase homolog (E. coli)	protein-coding
chr13	58215303	58216318	+	946	NA	promoter-TSS (NM_026842)	promoter-TSS (NM_026842)	-157	NM_026842	56085	Mm.182053	NM_026842	ENSMUSG00000005312	Ubqln1	1110046H03Rik|1810030E05Rik|AU019746|C77538|D13Ertd372e|Da41|Dsk2|Plic-1|Plic1|Xdrp1	ubiquilin 1	protein-coding
chr13	58401537	58403321	+	1000	NA	promoter-TSS (NM_001301345)	promoter-TSS (NM_001301345)	83	NR_153502	15387	Mm.142872	NM_025279	ENSMUSG00000021546	Hnrnpk	Hnrpk|KBBP|NOVA	heterogeneous nuclear ribonucleoprotein K	protein-coding
chr13	5841500	5841770	+	817	NA	Intergenic	Intergenic	16457	NR_045891	71867	Mm.179181	NR_045891	ENSMUSG00000100625	1700016G22Rik	-	RIKEN cDNA 1700016G22 gene	ncRNA
chr13	59723862	59724217	+	600	NA	Intergenic	Intergenic	7713	NM_177711	238663	Mm.444776	NM_177711	ENSMUSG00000043986	Spata31d1d	4932411G14Rik|Fam75d1d	spermatogenesis associated 31 subfamily D, member 1D	protein-coding
chr13	60662535	60662873	+	807	NA	intron (NM_134062, intron 2 of 26)	intron (NM_134062, intron 2 of 26)	60493	NM_134062	69635	Mm.24103	NM_029653	ENSMUSG00000021559	Dapk1	D13Ucla1|DAP-Kinase	death associated protein kinase 1	protein-coding
chr13	60897360	60897715	+	607	NA	promoter-TSS (NM_007797)	promoter-TSS (NM_007797)	-90	NM_001145801	13025	Mm.30144	NM_007797	ENSMUSG00000074874	Ctla2b	AW545568|Ctla-2b	cytotoxic T lymphocyte-associated protein 2 beta	protein-coding
chr1	36116527	36117029	+	647	NA	Intergenic	Intergenic	27535	NR_105862	102465540		NR_105862	ENSMUSG00000098752	Mir6897	Gm27652|mmu-mir-6897	microRNA 6897	ncRNA
chr13	62466733	62466984	+	868	NA	promoter-TSS (NM_001136496)	promoter-TSS (NM_001136496)	-46	NM_178875	71508	Mm.442497	NM_178875	ENSMUSG00000113450	Zfp935	8430426H19Rik|Es113	zinc finger protein 935	protein-coding
chr13	62653141	62653391	+	686	NA	Intergenic	Intergenic	-29084	NM_173381	211378	Mm.247448	NM_173381	ENSMUSG00000072066	6720489N17Rik	9330128I06	RIKEN cDNA 6720489N17 gene	protein-coding
chr13	63186756	63187520	+	902	NA	intron (NM_001289926, intron 7 of 15)	intron (NM_001289926, intron 7 of 15)	-52891	NR_110520	72061	Mm.188105	NM_028079	ENSMUSG00000021458	Aopep	2010111I01Rik|2300006M17Rik|AP-O|AW742919|ApO|mir-23b|mir-24-1|mir-27b	aminopeptidase O	protein-coding
chr13	63815043	63815716	+	1000	NA	5' UTR (NM_023507, exon 1 of 14)	5' UTR (NM_023507, exon 1 of 14)	139	NM_023507	76251	Mm.186610	NM_023507	ENSMUSG00000021470	Ercc6l2	0610007P08Rik|1700019D06Rik|9330134C04Rik|Rad26l|Sr278	excision repair cross-complementing rodent repair deficiency, complementation group 6 like 2	protein-coding
chr13	64248567	64249148	+	677	NA	promoter-TSS (NM_001122989)	promoter-TSS (NM_001122989)	157	NR_045798	66503	Mm.443331	NR_045798	ENSMUSG00000097101	1810034E14Rik	-	RIKEN cDNA 1810034E14 gene	ncRNA
chr13	65278451	65279040	+	948	NA	promoter-TSS (NM_178364)	promoter-TSS (NM_178364)	-109	NM_178364	170936	Mm.151546	NM_178364	ENSMUSG00000021514	Zfp369	B930030B22Rik|D230020H11Rik|NRIF2	zinc finger protein 369	protein-coding
chr13	66904972	66905480	+	1000	NA	promoter-TSS (NM_001177750)	promoter-TSS (NM_001177750)	124	NM_026219	67530	Mm.379136	NM_026219	ENSMUSG00000021520	Uqcrb	2210415M14Rik|QP-C|QPC|UQBC|UQBP|UQPC	ubiquinol-cytochrome c reductase binding protein	protein-coding
chr13	67081083	67081674	+	1000	NA	intron (NM_001012325, intron 1 of 3)	intron (NM_001012325, intron 1 of 3)	167	NM_001292066	432769	Mm.458849	NM_001012325	ENSMUSG00000058883	Zfp708	Rslcan11	zinc finger protein 708	protein-coding
chr13	67637285	67637959	+	924	NA	intron (NM_183146, intron 1 of 3)	intron (NM_183146, intron 1 of 3)	159	NM_183146	212281	Mm.342918	NM_183146	ENSMUSG00000021510	Zfp729a	A530054K11Rik|Rslcan3	zinc finger protein 729a	protein-coding
chr13	68581716	68582473	+	1000	NA	promoter-TSS (NR_131892)	promoter-TSS (NR_131892)	10	NM_001308475	210009	Mm.205514	NM_172480	ENSMUSG00000034617	Mtrr	4732420G08|MSR	5-methyltetrahydrofolate-homocysteine methyltransferase reductase	protein-coding
chr13	69739202	69740129	+	683	NA	5' UTR (NM_001145162, exon 1 of 2)	5' UTR (NM_001145162, exon 1 of 2)	232	NM_001145162	76980	Mm.23960	NM_001145162	ENSMUSG00000052981	Ube2ql1	3110006E14Rik	ubiquitin-conjugating enzyme E2Q family-like 1	protein-coding
chr13	72639527	72640389	+	1000	NA	Intergenic	Intergenic	11138	NM_010574	16372	Mm.28888	NM_010574	ENSMUSG00000001504	Irx2	-	Iroquois homeobox 2	protein-coding
chr13	73160271	73160723	+	786	NA	Intergenic	Intergenic	68603	NR_126459	75361	Mm.385732	NR_126459		4930555K05Rik	-	RIKEN cDNA 4930555K05 gene	ncRNA
chr13	73330875	73331432	+	597	NA	intron (NM_053163, intron 1 of 1)	CpG	144	NM_053163	94066	Mm.26775	NM_053163	ENSMUSG00000021607	Mrpl36	AI646041	mitochondrial ribosomal protein L36	protein-coding
chr13	74208436	74208993	+	619	NA	promoter-TSS (NM_177333)	promoter-TSS (NM_177333)	-14	NM_177333	211446	Mm.261859	NM_177333	ENSMUSG00000034152	Exoc3	2810050O03Rik|E430013E20Rik|Sec6|Sec6l1	exocyst complex component 3	protein-coding
chr1	37429754	37430675	+	1000	NA	promoter-TSS (NM_026123)	promoter-TSS (NM_026123)	75	NM_026123	67387	Mm.27404	NM_026123	ENSMUSG00000026111	Unc50	1110002A21Rik|GMH1|UNCL|URP	unc-50 homolog	protein-coding
chr13	74807550	74808777	+	1000	NA	promoter-TSS (NM_009817)	promoter-TSS (NM_009817)	-203	NM_009817	12380	Mm.29163	NM_009817	ENSMUSG00000021585	Cast	-	calpastatin	protein-coding
chr13	76098282	76098830	+	820	NA	promoter-TSS (NM_001081352)	promoter-TSS (NM_001081352)	104	NM_001360843	77041	Mm.196399	NM_029847	ENSMUSG00000021592	Arsk	2810429K17Rik|4833414G15Rik	arylsulfatase K	protein-coding
chr13	76123217	76123544	+	874	NA	intron (NM_001081352, intron 12 of 43)	B4|SINE|B4	24646	NM_001081352	218343	Mm.277964	NM_001081352	ENSMUSG00000033991	Ttc37	-	tetratricopeptide repeat domain 37	protein-coding
chr13	77135009	77135818	+	1000	NA	promoter-TSS (NM_001145676)	promoter-TSS (NM_001145676)	55	NM_134071	105377	Mm.209730	NM_134071	ENSMUSG00000021597	Slf1	2700017A04Rik|AW545819|Ankrd32|Brctd1|Brctx|C730024G01Rik	SMC5-SMC6 complex localization factor 1	protein-coding
chr13	77708527	77708976	+	668	NA	promoter-TSS (NR_028109)	promoter-TSS (NR_028109)	61	NR_028109	68675	Mm.343005	NM_138312	ENSMUSG00000064138	Fam172a	1110033M05Rik|2610318O14Rik|53-E6|9430037D06Rik|AF064782|pEN87	family with sequence similarity 172, member A	protein-coding
chr1	37890055	37890793	+	812	NA	promoter-TSS (NM_026913)	promoter-TSS (NM_026913)	-13	NM_026913	69028	Mm.63984	NM_026913	ENSMUSG00000026088	Mitd1	1500032H18Rik	MIT, microtubule interacting and transport, domain containing 1	protein-coding
chr13	8087228	8087488	+	763	NA	Intergenic	Intergenic	-115508	NM_001289530	94191	Mm.425794	NM_052977	ENSMUSG00000052551	Adarb2	Adar3|RED2	adenosine deaminase, RNA-specific, B2	protein-coding
chr13	80936492	80936784	+	597	NA	Intergenic	Intergenic	-3765	NR_103550	71416	Mm.415500	NR_103550		5430425K12Rik	-	RIKEN cDNA 5430425K12 gene	ncRNA
chr13	81684344	81684610	+	758	NA	intron (NM_001081176, intron 5 of 7)	ORR1B1|LTR|ERVL-MaLR	26536	NM_001081176	67486	Mm.279781	NM_001081176	ENSMUSG00000035834	Polr3g	2310047G20Rik|AV275904|RPC32|RPC7	polymerase (RNA) III (DNA directed) polypeptide G	protein-coding
chr13	83163791	83164330	+	902	NA	Intergenic	Intergenic	-339974	NM_025282	17260	Mm.24001	NM_025282	ENSMUSG00000005583	Mef2c	5430401D19Rik|9930028G15Rik|AV011172|Mef2	myocyte enhancer factor 2C	protein-coding
chr1	38626625	38628025	+	732	NA	promoter-TSS (NM_001290814)	promoter-TSS (NM_001290814)	-81	NM_001290814	16764	Mm.336679	NM_010678	ENSMUSG00000037138	Aff3	3222402O04Rik|A730046J16|LAF-4|Laf4	AF4/FMR2 family, member 3	protein-coding
chr13	89444694	89445211	+	1000	NA	Intergenic	Intergenic	-95684	NM_013500	12950	Mm.266790	NM_013500	ENSMUSG00000021613	Hapln1	BB099155|CLP|Crtl1|Crtl1l|LP|LP-1	hyaluronan and proteoglycan link protein 1	protein-coding
chr13	90515901	90516233	+	826	NA	Intergenic	Intergenic	389288	NM_001145879	435376	Mm.292579	NM_001145879	ENSMUSG00000078958	Atp6ap1l	EG435376	ATPase, H+ transporting, lysosomal accessory protein 1-like	protein-coding
chr13	91650029	91650308	+	970	NA	intron (NM_024272, intron 5 of 16)	intron (NM_024272, intron 5 of 16)	-91353	NM_028790	74156	Mm.275963	NM_028790	ENSMUSG00000021620	Acot12	1300004O04Rik|4930449F15Rik|AV027244|Cach|mCACH-1	acyl-CoA thioesterase 12	protein-coding
chr13	92425826	92427120	+	675	NA	intron (NM_175455, intron 1 of 4)	CpG	504	NM_175455	218440	Mm.213623	NM_175455	ENSMUSG00000045034	Ankrd34b	6430502M16Rik|DP58	ankyrin repeat domain 34B	protein-coding
chr13	92483845	92484200	+	972	NA	promoter-TSS (NM_001163627)	promoter-TSS (NM_001163627)	9	NM_001163627	73942	Mm.85935	NM_001163627	ENSMUSG00000034334	Fam151b	4930405M20Rik	family with sequence similarity 151, member B	protein-coding
chr13	92610703	92611540	+	752	NA	promoter-TSS (NM_172588)	promoter-TSS (NM_172588)	-17	NM_172588	218442	Mm.297970	NM_172588	ENSMUSG00000021703	Serinc5	A130038L21Rik|AIGP3|C86123|TPO1	serine incorporator 5	protein-coding
chr13	96388049	96388480	+	1000	NA	promoter-TSS (NM_026173)	promoter-TSS (NM_026173)	-30	NM_026173	67463	Mm.86472	NM_026173	ENSMUSG00000021671	Poc5	1200014M14Rik|AV144706	POC5 centriolar protein	protein-coding
chr13	96487300	96487768	+	1000	NA	intron (NM_001347604, intron 10 of 12)	L1MD3|LINE|L1	-16315	NM_001369169	271144	Mm.470057	NM_001042714	ENSMUSG00000047117	Ankdd1b	9330128J19Rik	ankyrin repeat and death domain containing 1B	protein-coding
chr13	97137603	97138088	+	613	NA	promoter-TSS (NM_001271465)	promoter-TSS (NM_001271465)	81	NM_021552	59050	Mm.390634	NM_021552	ENSMUSG00000060739	Nsa2	5730427N09Rik|LNR42|Nsa2p|Tinp1|Yr29	NSA2 ribosome biogenesis homolog	protein-coding
chr13	97626755	97627084	+	572	NA	Intergenic	Intergenic	66919	NR_046157	328314	Mm.138047	NR_046157	ENSMUSG00000110235	Gm5086	B230311A21|EG328314	predicted gene 5086	ncRNA
chr13	98205762	98206620	+	765	NA	promoter-TSS (NM_012026)	promoter-TSS (NM_012026)	-26	NM_012026	110596	Mm.252718	NM_012026	ENSMUSG00000021662	Arhgef28	9230110L08Rik|AI323540|D13Bwg1089e|RIP2|Rgnef|RhoGEF|Rhoip2|p190RhoGEF	Rho guanine nucleotide exchange factor (GEF) 28	protein-coding
chr13	98262843	98263194	+	836	NA	promoter-TSS (NM_001271389)	promoter-TSS (NM_001271389)	-26	NM_178918	105372	Mm.28221	NM_178918	ENSMUSG00000041747	Utp15	AW544865	UTP15 small subunit processome component	protein-coding
chr1	40340595	40340969	+	875	NA	intron (NM_001356478, intron 4 of 10)	B4|SINE|B4	16193	NM_133193	107527	Mm.155583	NM_133193	ENSMUSG00000070942	Il1rl2	AI481289|AW551444|IL-1Rrp2	interleukin 1 receptor-like 2	protein-coding
chr1	40444768	40445196	+	602	NA	intron (NM_001025602, intron 6 of 10)	intron (NM_001025602, intron 6 of 10)	5353	NM_001025602	17082	Mm.289824	NM_010743	ENSMUSG00000026069	Il1rl1	DER4|Fit-1|Ly84|ST2L|St2|St2-rs1|T1|T1/ST2	interleukin 1 receptor-like 1	protein-coding
chr1	40465530	40465971	+	693	NA	promoter-TSS (NM_008365)	promoter-TSS (NM_008365)	129	NM_001161843	16182	Mm.253664	NM_008365	ENSMUSG00000026070	Il18r1	Il18ralpha|Il1rrp	interleukin 18 receptor 1	protein-coding
chr1	40847590	40847885	+	800	NA	intron (NM_001081198, intron 4 of 4)	intron (NM_001081198, intron 4 of 4)	42136	NM_001081198	381339	Mm.334678	NM_001081198	ENSMUSG00000079588	Tmem182	2310079P10Rik|AI414494	transmembrane protein 182	protein-coding
chr14	102981305	102983115	+	963	NA	TTS (NR_039592)	TTS (NR_039592)	422	NR_039592	100628599		NR_039592	ENSMUSG00000092901	Mir5130	mir-5130|mmu-mir-5130|mu-mir-5130	microRNA 5130	ncRNA
chr14	103012616	103012877	+	1000	NA	intron (NR_045657, intron 2 of 2)	intron (NR_045657, intron 2 of 2)	21057	NR_045657	71264	Mm.399572	NR_045657	ENSMUSG00000114980	4933432I03Rik	-	RIKEN cDNA 4933432I03 gene	ncRNA
chr14	105588706	105589151	+	1000	NA	promoter-TSS (NR_102319)	promoter-TSS (NR_102319)	-621	NR_102319	380930	Mm.427836	NR_102319	ENSMUSG00000115149	9330188P03Rik	Gm1589|mgt-6	RIKEN cDNA 9330188P03 gene	ncRNA
chr14	106156669	106156927	+	1000	NA	Intergenic	Intergenic	50600	NR_073203	212085	Mm.78128	NM_198601	ENSMUSG00000022113	Trim52	4921513B05Rik	tripartite motif-containing 52	protein-coding
chr14	108258634	108259004	+	746	NA	Intergenic	RMER15|LTR|ERVL	655420	NM_199065	76965	Mm.257268	NM_199065	ENSMUSG00000075478	Slitrk1	3200001I04Rik	SLIT and NTRK-like family, member 1	protein-coding
chr14	110754826	110755325	+	1000	NA	promoter-TSS (NM_175499)	promoter-TSS (NM_175499)	74	NM_175499	239250	Mm.49728	NM_175499	ENSMUSG00000045871	Slitrk6	4832410J21Rik|Sltk6	SLIT and NTRK-like family, member 6	protein-coding
chr14	11161596	11162283	+	924	NA	promoter-TSS (NM_001360141)	promoter-TSS (NM_001360141)	96	NM_010210	14198	Mm.397619	NM_010210	ENSMUSG00000060579	Fhit	AW045638|Fra14A2	fragile histidine triad gene	protein-coding
chr14	113342716	113343034	+	650	NA	Intergenic	Intergenic	-1489090	NR_045661	75822	Mm.410813	NR_045661	ENSMUSG00000115320	4930524C18Rik	-	RIKEN cDNA 4930524C18 gene	ncRNA
chr14	118088791	118089630	+	840	NA	Intergenic	Intergenic	-36964	NM_010024	13190	Mm.19987	NM_010024	ENSMUSG00000022129	Dct	DT|TRP-2|TRP2|Tyrp-2|Tyrp2|slaty|slt	dopachrome tautomerase	protein-coding
chr14	118132597	118132943	+	832	NA	promoter-TSS (NM_029578)	promoter-TSS (NM_029578)	-5	NM_029578	76355	Mm.251537	NM_029578	ENSMUSG00000022130	Tgds	2610017J16Rik|2610025M23Rik|AI648925	TDP-glucose 4,6-dehydratase	protein-coding
chr14	118304534	118304919	+	575	NA	Intergenic	Intergenic	37568	NM_001101609	668814	Mm.425909	NM_001101609	ENSMUSG00000092109	Gm9376	EG668814	predicted gene 9376	protein-coding
chr14	118393676	118394164	+	750	NA	intron (NR_045624, intron 4 of 5)	intron (NR_045624, intron 4 of 5)	28042	NR_045624	73306	Mm.362328	NR_045624	ENSMUSG00000099911	1700044C05Rik	-	RIKEN cDNA 1700044C05 gene	ncRNA
chr14	118768104	118768350	+	630	NA	Intergenic	Intergenic	-19644	NM_023878	58187	Mm.390755	NM_021386	ENSMUSG00000022132	Cldn10	6720456I16Rik|Cldn10a|Cldn10b|D14Ertd728e	claudin 10	protein-coding
chr14	119137553	119138589	+	668	NA	promoter-TSS (NM_015820)	promoter-TSS (NM_015820)	-194	NM_015820	50787	Mm.445777	NM_015820	ENSMUSG00000053465	Hs6st3	6OST3|HS6ST-3	heparan sulfate 6-O-sulfotransferase 3	protein-coding
chr14	120137580	120138173	+	994	NA	Intergenic	Intergenic	-95441	NM_001001490	239283	Mm.138520	NM_001001490	ENSMUSG00000044819	Oxgr1	Cysltr3|Gm299|Gpr80|Gpr99|P2Y15	oxoglutarate (alpha-ketoglutarate) receptor 1	protein-coding
chr14	121524766	121525161	+	553	NA	Intergenic	L1MB5|LINE|L1	-19709	NM_053079	56643	Mm.155618	NM_053079	ENSMUSG00000025557	Slc15a1	D630032F02|PECT1|PEPT1	solute carrier family 15 (oligopeptide transporter), member 1	protein-coding
chr14	122473708	122475252	+	727	NA	promoter-TSS (NM_009574)	promoter-TSS (NM_009574)	719	NR_045046	69248	Mm.235369	NR_045046	ENSMUSG00000085555	2610035F20Rik	-	RIKEN cDNA 2610035F20 gene	ncRNA
chr14	122902821	122903409	+	918	NA	intron (NM_145466, intron 1 of 2)	intron (NM_145466, intron 1 of 2)	-9915	NR_155286	105245866	Mm.390754	NM_001039531	ENSMUSG00000075463	4930594M22Rik	F930011C10Rik|Gm15735	RIKEN cDNA 4930594M22 gene	ncRNA
chr14	123312401	123312678	+	1000	NA	intron (NM_177393, intron 27 of 43)	intron (NM_177393, intron 27 of 43)	143353	NR_045143	380934	Mm.393838	NR_045143	ENSMUSG00000115016	AA536875	Gm1591	expressed sequence AA536875	ncRNA
chr14	123533072	123533357	+	600	NA	intron (NM_177393, intron 7 of 43)	intron (NM_177393, intron 7 of 43)	93930	NM_177393	338370	Mm.255348	NM_177393	ENSMUSG00000000197	Nalcn	A530023G15Rik|AI849508|Vgcnl1	sodium leak channel, non-selective	protein-coding
chr14	123662254	123662921	+	1000	NA	intron (NM_145467, intron 2 of 10)	intron (NM_145467, intron 2 of 10)	2447	NM_145467	223272	Mm.383176	NM_145467	ENSMUSG00000032925	Itgbl1	B930011D01Rik	integrin, beta-like 1	protein-coding
chr14	124489016	124489371	+	710	NA	intron (NM_207667, intron 1 of 4)	intron (NM_207667, intron 1 of 4)	187934	NM_207667	14169	Mm.206362	NM_010201	ENSMUSG00000025551	Fgf14	FHF-4|Fhf4|Tg(tetO-MAPT*P301L)4510Kha|mFHF-4(1B)	fibroblast growth factor 14	protein-coding
chr14	12821450	12823185	+	656	NA	exon (NM_001042617, exon 1 of 31)	exon (NM_001042617, exon 1 of 31)	762	NM_001359920	27062	Mm.260881	NM_012061	ENSMUSG00000054423	Cadps	AU067781|CAPS|CAPS1|mKIAA1121	Ca2+-dependent secretion activator	protein-coding
chr14	13960698	13961837	+	813	NA	promoter-TSS (NM_001285780)	promoter-TSS (NM_001285780)	46	NM_001359900	66231	Mm.295875	NM_025435	ENSMUSG00000053453	Thoc7	Nif3l1bp1	THO complex 7	protein-coding
chr14	16249101	16250058	+	1000	NA	promoter-TSS (NM_001359882)	promoter-TSS (NM_001359882)	229	NM_027695	71147	Mm.197960	NM_027695	ENSMUSG00000021786	Oxsm	4933425A18Rik|C80494	3-oxoacyl-ACP synthase, mitochondrial	protein-coding
chr14	20294526	20294746	+	769	NA	promoter-TSS (NM_026341)	promoter-TSS (NM_026341)	-54	NM_001359868	67725	Mm.317636	NM_026341	ENSMUSG00000021809	Nudt13	4933433B15Rik	nudix (nucleoside diphosphate linked moiety X)-type motif 13	protein-coding
chr14	20388526	20389123	+	608	NA	promoter-TSS (NM_134081)	promoter-TSS (NM_134081)	86	NM_134081	108671	Mm.2871	NM_134081	ENSMUSG00000021811	Dnajc9	5330419I01Rik|AU020082	DnaJ heat shock protein family (Hsp40) member C9	protein-coding
chr14	20609975	20610576	+	869	NA	intron (NM_030180, intron 1 of 20)	intron (NM_030180, intron 1 of 20)	8079	NM_030180	78787	Mm.301173	NM_030180	ENSMUSG00000034235	Usp54	4930429G18Rik|AI115571|C030002J06Rik	ubiquitin specific peptidase 54	protein-coding
chr14	20660776	20662215	+	619	NA	exon (NM_001310432, exon 2 of 2)	exon (NM_001310432, exon 2 of 2)	3079	NM_001310432	68760	Mm.35789	NM_175132	ENSMUSG00000039376	Synpo2l	1110054M18Rik|Chap	synaptopodin 2-like	protein-coding
chr14	20793207	20794407	+	1000	NA	promoter-TSS (NR_153779)	promoter-TSS (NR_153779)	281	NM_001039138	12325	Mm.235182	NM_178597	ENSMUSG00000021820	Camk2g	Camkg	calcium/calmodulin-dependent protein kinase II gamma	protein-coding
chr14	20806161	20806932	+	617	NA	Intergenic	Intergenic	12307	NR_153779	102631887	Mm.122292	NR_153779	ENSMUSG00000114241	Gm30108	-	predicted gene, 30108	ncRNA
chr14	21750406	21751218	+	587	NA	promoter-TSS (NM_001359953)	promoter-TSS (NM_001359953)	281	NM_026283	67630	Mm.102765	NM_026283	ENSMUSG00000021770	Samd8	1110053F04Rik|1700010P07Rik|SMSr	sterile alpha motif domain containing 8	protein-coding
chr14	21995345	21995815	+	701	NA	Intergenic	CpG	-5979	NM_145459	218820	Mm.292401	NM_145459	ENSMUSG00000039081	Zfp503	AI181838|B830002A16Rik|Nolz-1|Nolz1|Znf503	zinc finger protein 503	protein-coding
chr14	24004446	24005088	+	641	NA	promoter-TSS (NM_001253373)	promoter-TSS (NM_001253373)	-224	NR_131107	78019	Mm.243845	NR_131107	ENSMUSG00000114953	4930519K11Rik	-	RIKEN cDNA 4930519K11 gene	ncRNA
chr14	25588967	25589736	+	835	NA	non-coding (NR_033492, exon 1 of 1)	non-coding (NR_033492, exon 1 of 1)	2547	NR_033492	77592	Mm.444871	NM_175264		4931406H21Rik	-	RIKEN cDNA 4931406H21 gene	ncRNA
chr14	25841938	25842754	+	956	NA	intron (NM_013469, intron 1 of 14)	CpG	191	NM_013469	11744	Mm.294083	NM_013469	ENSMUSG00000021866	Anxa11	A830099O17Rik|Anx11	annexin A11	protein-coding
chr14	26066741	26067524	+	752	NA	promoter-TSS (NM_001270496).2	promoter-TSS (NM_001270496).2	-129	NM_025311	66039	Mm.33344	NM_025311	ENSMUSG00000072676	Tmem254a	0610008K04Rik|0610010A22Rik|AA960404|D14Ertd449e|Tmem254	transmembrane protein 254a	protein-coding
chr14	26668358	26670195	+	1000	NA	TTS (NR_106132)	TTS (NR_106132)	332	NR_106132	102465773		NR_106132	ENSMUSG00000098751	Mir7672	Gm27314|mmu-mir-7672	microRNA 7672	ncRNA
[truncated: 2,202 more rows]
