# Supplementary material for: The LINC complex transmits integrin-dependent tension to the nuclear lamina and represses epidermal differentiation
Source: eLife. 2021 Mar 29;10:e58541. doi: 10.7554/eLife.58541 (PMC8051949; doi:10.7554/eLife.58541)
Supplement: Supplementary file 5. [file elife-58541-supp5.xlsx]

## Sheet: Sheet 1
no change
more peaks in SUNdKO
less peaks in SUN dKO
ND
Keratins / Intermediate Filaments
KRT1
KRT5
KRT6a
KRT6b
KRT10
KRT13
KRT14
KRT15
KRT16
KRT19
Cell Adhesion genes
Itga6
Cdh1
Dsc2
Dsg1b
Dsg2
Cldn1
Cldn4
Ocln
Proliferation GO term genes (http://www.informatics.jax.org/go/term/GO:0043616)
Bcl11b
Cask
Cd109
Cdh3
Cdh13
Crnn
Ctsl
Efnb2
Eppk1
Ereg
Fermt1
Fgf7
Fgf10
Fgfr2
Fst
Has2
Intu
Irf6
Kdf1
Klf9
Klk8
Mdk
Med1
Notch2
Ovol2
Ppard
Prkd1
Ptch1
Ptprk
Reg3a
Reg3g
Sdr16c5
Sfn
Slurp1
Slurp2
Snai2
Srsf6
Stxbp4
Tgm1
Tlr4
Trp63
Twist2
Vdr
Wnt16
Yap1
Zfp36
Zfp36l1
Cyclins / Cdks
Cdkn1a
Ccnd2
Cdk18
Cdkn1c
Ccne1
